# Supplementary material for: Enantioselective Michael addition of 3-hydroxy-2-pyridone to nitroolefins using cinchona-derived bifunctional organocatalysts
Source: Royal Society of Chemistry journal article supplement (doi:10.1039/d4ob01042f), 2024-01-01

Supporting Information for

## Enantioselective Michael Addition of 3-Hydroxy-2-pyridone to Nitroolefins using *Cinchona*-derived Bifunctional Organocatalysts

Minseok Gi,<sup>†</sup> Daehyun Oh,<sup>†</sup> Sehun Yang,<sup>†</sup> Jaeyong Lee,<sup>†</sup> So Hyun Jung,<sup>†</sup> Ju Ha Baek,<sup>†</sup> Min Woo Ha,<sup>§</sup> Geumwoo Lee,<sup>†,\*</sup> and Hyeung-geun Park<sup>†,\*</sup>

<sup>†</sup>*Research Institute of Pharmaceutical Sciences and College of Pharmacy, Seoul National University, Seoul 08826, Korea.* <sup>§</sup>*Jeju Research Institute of Pharmaceutical Sciences, College of Pharmacy, Jeju National University, Jeju 63243, Republic of Korea*

[hgpk@snu.ac.kr](mailto:hgpk@snu.ac.kr)

### List of Contents

|                                                                        |      |
|------------------------------------------------------------------------|------|
| (1) General Information -----                                          | S2   |
| (2) General Procedures -----                                           | S2   |
| (3) Analytical data -----                                              | S4   |
| (4) Reference -----                                                    | S22  |
| (5) <sup>1</sup> H, <sup>13</sup> C, <sup>19</sup> F NMR Spectra ----- | S23  |
| (6) Chiral HPLC Chromatogram -----                                     | S101 |
| (7) COSY & <sup>1</sup> H- <sup>13</sup> C HSQC -----                  | S120 |
| (8) Gram-scale procedure of <b>8o</b> -----                            | S122 |
| (9) X-ray Crystallographic Data of <b>8o</b> -----                     | S123 |

## (1) General Information

All reagents purchased from commercial sources were used without further purification. TLC analyses were performed using pre-coated TLC plate (silica gel 60 GF<sub>254</sub>, 0.25 mm). Flash column chromatography was performed on flash silica gel 230~400 mesh size. The values of enantiomeric excess (ee) of chiral products were determined by HPLC using 4.6 mm × 250 mm Daicel Chiralpak AD-H, Chiralcel OD-H, Chiralpak OJ-H and Chiralpak ID columns. Infrared analyses (KBr pellet) were performed by FT-IR. <sup>1</sup>H-NMR spectra were recorded at 400 MHz, 600 MHz or 800 MHz with reference to CHCl<sub>3</sub> (δ 7.24), CH<sub>3</sub>OH (δ 3.31) and DMSO (δ 2.5). <sup>13</sup>C-NMR spectra were obtained by 101 MHz, 151 MHz or 201 MHz spectrometer relative to the central CDCl<sub>3</sub> (δ 77.0) or CD<sub>3</sub>OD (δ 49.0) resonance. <sup>19</sup>F-NMR spectra were obtained by 376 MHz, 564 MHz or 753 MHz spectrometer. Coupling constants (*J*) in <sup>1</sup>H-NMR are in Hz. Low-resolution mass spectra (LRMS) and high-resolution mass spectra (HRMS) were measured on positive-ion FAB or CI spectrometer. Melting points were measured on melting point apparatus and were uncorrected. Optical rotations were measured on polarimeter and calibrated with pure solvent as blank. The organocatalysts **3a**<sup>1</sup>, **3b**<sup>2</sup>, **4**<sup>3</sup> and **5a-d**<sup>4</sup> were prepared following the reported procedures. [The crystal structure of \*\*8o\*\* was measured by Dr. Huiyeong Ju using a single-crystal X-ray diffractometer at the Korea Basic Science Institute \(KBSI\) Western Seoul Center](#)

## (2) General Procedures

### *(A) Procedure for preparation of 6.*

a) 2,3-Dihydroxypyridine (220 mg, 1.98 mmol), imidazole (337 mg, 4.95 mmol) and anhydrous DMF (5 ml) were added to round bottom flask charged with argon gas. The reaction

mixture was stirred for 15 min and add TBDMSCl (239 mg, 2.18 mmol). The mixture was stirred for another 4 hours. After the reaction was finished, the mixture was diluted with diethyl ether (30 ml), washed with water and brine, dried over anhydrous MgSO<sub>4</sub>, filtered, and concentrated *in vacuo*. Purification of the residue by recrystallization with diethyl ether and hexane to afford 3-((*tert*-butyldimethylsilyl)oxy)pyridin-2(1*H*)-one (400 mg, 90% yield) as a white clear crystal.

b) 3-((*tert*-Butyldimethylsilyl)oxy)pyridin-2(1*H*)-one (400 mg, 1.78 mmol) and diethyl ether (20 mL) were added to round bottom flask charged with argon gas. After lower the temperature to 0 °C, MeLi in ether (1.6 M in diethyl ether, 1.2 mL, 2.14 mmol) was added and stirred for 2 hours. Add 4-Toluenesulfonyl chloride (338 mg, 1.78 mmol) and the reaction was stirred another 30 hours for room temperature. After the reaction was finished, the mixture was diluted with diethyl ether (30 mL), washed with water and brine, dried over anhydrous MgSO<sub>4</sub>, filtered, and concentrated *in vacuo*. Purification of the residue by recrystallization with diethyl ether and hexane to afford 3-((*tert*-butyldimethylsilyl)oxy)-1-tosylpyridin-2(1*H*)-one (492 mg, 73% yield) as a white solid.

c) 3-((*tert*-Butyldimethylsilyl)oxy)-1-tosylpyridin-2(1*H*)-one (1.37 g, 3.6 mmol) and dichloromethane (10 mL) was added to round bottom flask. After lower the temperature to 0 °C, boron trifluoro diethyl etherate (0.49 mL, 3.96 mmol) was added dropwise and the reaction mixture was stirred for 24 hours. After the reaction was finished, the mixture was diluted with dichloromethane (30 mL) and washed with water and brine, dried over anhydrous MgSO<sub>4</sub>, filtered, and concentrated *in vacuo*. Purification of the residue by recrystallization with dichloromethane and hexane to afford **6** (1.01 g, 96% yield) as a white crystal.

### ***(B) General procedure for nitroolefin***

Aldehyde (15.0 mmol), nitromethane (0.9 mL, 16.6 mmol) and methanol (10 mL) were added to round bottom flask. After lower the temperature to 0 °C, NaOH (0.72 g, 18.1 mmol) was added portionwise and stirred. After an hour, 2 N HCl (15 mL, 30 mmol) was added slow and stirred for 15 min. After the reaction was finished, the mixture was diluted with dichloromethane and washed with water and brine, dried over anhydrous MgSO<sub>4</sub>, filtered, and concentrated *in vacuo*. Purifications of the residue by flash column chromatography (ethyl acetate/ hexane, 1/100 ~ 1/10. v/v) to afford aliphatic nitroolefin **7**.

### ***(C) Typical experimental procedure for asymmetric Michael reaction.***

**6** (20 mg, 0.08 mmol), nitroolefin **7** (0.16 mmol), catalyst **5a** (4.2 mg, 0.01 mmol) and dichloromethane (0.7 ml) were added to round bottom flask. At the designated temperature, the reaction mixture was stirred. After the reaction finished, the reaction mixture was concentrated. Purification of the residue by flash column chromatography (ethyl acetate/hexane, 1~100~4/10, v/v) to afford Michael adduct **8**.

## **(3) Analytical data**

### **3-Hydroxy-1-tosylpyridin-2(1H)-one (**6**)**

Following the procedure (A) from 2,3-dihydroxypyridine (220 mg, 1.98 mmol), the molecule **6** was obtained as a white solid (262 mg, overall 50% yield). <sup>1</sup>H-NMR (400 MHz, CDCl<sub>3</sub>) δ 8.00 (d, *J* = 8.2 Hz, 2H), 7.66 (dd, *J* = 7.5, 1.6 Hz, 1H), 7.36 (d, *J* = 8.7 Hz, 2H), 6.75 (dd, *J* = 7.1, 1.6 Hz, 1H), 6.53 (s, 1H), 6.23 (t, *J* = 7.3 Hz, 1H), 2.44 (s, 3H)ppm. <sup>13</sup>C NMR (101 MHz, CDCl<sub>3</sub>) δ 157.41, 147.27, 146.74, 133.12, 129.96, 129.75, 121.47, 114.41, 107.04, 77.43,

77.12, 76.80, 21.94 ppm, Compound **6** conforms to the reported data in the literature.<sup>5</sup>

### 3-methoxy-1-tosylpyridin-2(1H)-one (**6a**)

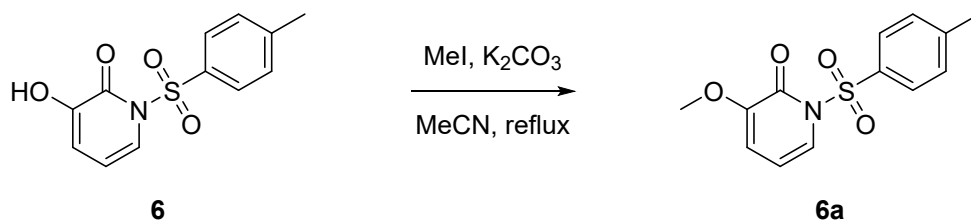

To a solution of compound **6** (50 mg, 0.19 mmol) and  $K_2CO_3$  (78 mg, 0.57 mmol) dissolved in acetonitrile (1.9 mL) was added methyl iodide (12.9  $\mu$ L, 0.21 mmol) in glass screw vial. The reaction mixture was heated at reflux for 3 h. After the reaction was finished, the mixture was quenched with water, extracted with EtOAc (10 mL). The organic phase was washed with brine, dried over anhydrous  $Na_2SO_4$ , filtered, and concentrated *in vacuo*. Purification of the residue by flash column chromatography (ethyl acetate/ hexane, 1/5 to 2/1 gradient. v/v) to afford Synthesis of 3-methoxy-1-tosylpyridin-2(1H)-one as a white solid (37 mg, 70% yield), m.p. 146.2–148.6  $^{\circ}C$ ;  $^1H$ -NMR (400 MHz,  $CDCl_3$ )  $\delta$  8.00 (d,  $J = 8.2$  Hz, 2H), 7.71 (dd,  $J = 7.3, 1.4$  Hz, 1H), 7.30 (d,  $J = 7.8$  Hz, 2H), 6.49 (dd,  $J = 7.3, 1.4$  Hz, 1H), 6.16 (t,  $J = 7.5$  Hz, 1H), 3.72 (s, 3H), 2.41 (s, 3H) ppm;  $^{13}C$  NMR (101 MHz,  $CDCl_3$ )  $\delta$  156.2, 151.0, 146.2, 133.3, 130.2, 129.5, 122.4, 112.4, 105.2, 77.4, 77.1, 76.8, 56.2, 21.9 ppm; IR (KBr) 1680, 1370, 1175, 1087  $cm^{-1}$ ; HRMS (FAB) Calcd for  $[C_{13}H_{14}NO_4S]^+$ : 280.0644, found 280.0646.

### 4-bromo-3-hydroxy-1-tosylpyridin-2(1H)-one (**6b**)

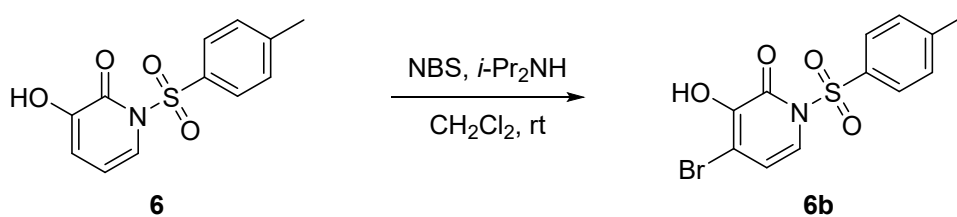

To a solution of compound **6** (50 mg, 0.19 mmol) and Diisopropylamine (2.66  $\mu$ L, 0.019 mmol)

dissolved in DCM (500  $\mu$ L) was added *N*-bromosuccinimide (37 mg, 0.21 mmol) portionwise under argon atmosphere. The reaction mixture was stirred for 1 h. After the reaction was finished, the mixture was quenched with water, extracted with DCM (10 mL). The organic phase was washed with brine, dried over anhydrous  $\text{Na}_2\text{SO}_4$ , filtered, and concentrated *in vacuo*. Purification of the residue by flash column chromatography (ethyl acetate/ hexane, 1/10 to 1/1 gradient. v/v) to afford Synthesis of 4-bromo-3-hydroxy-1-tosylpyridin-2(1*H*)-one as a white solid (31 mg, 52% yield), m.p. 140.3–142.2  $^\circ\text{C}$ ;  $^1\text{H-NMR}$  (400 MHz,  $\text{DMSO-}d_6$ )  $\delta$  10.62 (s, 1H), 7.92 (d,  $J = 8.7$  Hz, 2H), 7.57 (d,  $J = 8.2$  Hz, 1H), 7.45 (d,  $J = 8.2$  Hz, 2H), 6.59 (d,  $J = 7.8$  Hz, 1H), 2.38 (s, 3H) ppm ;  $^{13}\text{C NMR}$  (101 MHz,  $\text{DMSO-}d_6$ )  $\delta$  155.1, 147.1, 146.3, 133.2, 130.4, 129.9, 121.2, 113.2, 111.6, 21.77 ppm ; IR (KBr) 1635, 1372, 1180, 668  $\text{cm}^{-1}$ ; HRMS (FAB) Calcd for  $[\text{C}_{12}\text{H}_{11}\text{BrNO}_4\text{S}]^+$  : 343.9592, found 343.9602.

#### **(*E*)-1-Chloro-4-(3-nitroallyl)benzene (7l)**

Following the general procedure (**B**) from the 2-(4-chlorophenyl)acetaldehyde (200 mg, 1.3 mmol), the molecule **7l** was obtained as a yellow oil (91 mg, 44% yield).  $^1\text{H-NMR}$  (400 MHz,  $\text{CDCl}_3$ )  $\delta$  7.30-7.40 (m, 3H), 7.11 (dt,  $J = 8.8, 2.2$  Hz, 2H), 6.88 (dt,  $J = 13.3, 1.8$  Hz, 1H), 3.55 (dd,  $J = 7.1, 1.6$  Hz, 2H) ppm,  $^{13}\text{C NMR}$  (101 MHz,  $\text{CDCl}_3$ )  $\delta$  140.6, 140.5, 134.2, 133.5, 130.2, 129.3, 34.0 ppm, IR (KBr) 1650, 1523, 1352  $\text{cm}^{-1}$ ; HRMS (FAB) Calcd for  $[\text{C}_9\text{H}_8\text{ClNO}_2]^+$  : 197.0244, found 197.0247.

#### **(*E*)-1-Methyl-4-(3-nitroallyl)benzene (7m)**

Following the general procedure (**B**) from the 2-(*p*-tolyl)acetaldehyde (258 mg, 1.9 mmol), the molecule **7m** was obtained as a yellow oil (146 mg, 43% yield).  $^1\text{H-NMR}$  (400 MHz,  $\text{CDCl}_3$ )  $\delta$  7.37-7.43 (m, 1H), 7.15 (d,  $J = 7.8$  Hz, 2H), 7.06 (d,  $J = 7.8$  Hz, 2H), 6.89 (dt,  $J = 13.4, 1.7$

Hz, 1H), 3.53 (dd,  $J = 6.9, 1.4$  Hz, 2H), 2.34 (s, 3H) ppm,  $^{13}\text{C}$  NMR (101 MHz,  $\text{CDCl}_3$ )  $\delta$  141.5, 140.3, 137.2, 132.6, 129.8, 128.7, 34.3, 21.2 ppm, IR (KBr) 1650, 1520, 1350  $\text{cm}^{-1}$ ; HRMS (FAB) Calcd for  $[\text{C}_{10}\text{H}_{12}\text{NO}_2]^+$  : 177.0790, found 177.0783.

**(E)-1-Methoxy-4-(3-nitroallyl)benzene (7n)**

Following the general procedure (B) from the 2-(4-methoxyphenyl)acetaldehyde (290 mg, 1.9 mmol), the molecule 7n was obtained as a yellow oil (146 mg, 39% yield).  $^1\text{H}$ -NMR (400 MHz,  $\text{CDCl}_3$ )  $\delta$  7.35-7.42 (m, 1H), 7.08 (d,  $J = 8.7$  Hz, 2H), 6.85-6.89 (m, 3H), 3.79 (s, 3H), 3.51 (dd,  $J = 6.9, 1.8$  Hz, 2H) ppm,  $^{13}\text{C}$  NMR (101 MHz,  $\text{CDCl}_3$ )  $\delta$  159.0, 141.7, 140.3, 129.9, 127.6, 114.5, 55.4, 33.9 ppm, IR (KBr) 1649, 1513, 1351  $\text{cm}^{-1}$ ; HRMS (FAB) Calcd for  $[\text{C}_{10}\text{H}_{11}\text{NO}_3]^+$  : 193.0739, found 193.0739.

**(E)-1-Chloro-4-(4-nitrobut-3-en-1-yl)benzene (7q)**

Following the general procedure (B) from the 3-(4-chlorophenyl)propanal (672.1 mg, 4.0 mmol), the molecule 7q was obtained as a yellow oil (616.2 mg, 73% yield).  $^1\text{H}$ -NMR (400 MHz,  $\text{CDCl}_3$ )  $\delta$  7.28-7.20 (m, 4H), 7.09 (dt,  $J = 9.0, 2.3$  Hz, 2H), 6.94 (dt,  $J = 13.4, 1.5$  Hz, 1H), 2.80 (t,  $J = 7.3$  Hz, 2H), 2.56 (qd,  $J = 7.5, 1.4$  Hz, 2H) ppm;  $^{13}\text{C}$  NMR (101 MHz,  $\text{CDCl}_3$ )  $\delta$  141.2, 140.2, 138.2, 132.4, 129.8, 128.9, 33.8, 33.3, 30.0 ppm; IR (KBr) 1648, 1524, 1351  $\text{cm}^{-1}$ ; HRMS (FAB) Calcd for  $[\text{C}_{10}\text{H}_{11}\text{ClNO}_2]^+$  : 211.0400, found 211.0398.

**(E)-1-Methyl-4-(4-nitrobut-3-en-1-yl)benzene (7s)**

Following the general procedure (B) from the 3-(4-methylphenyl)propanal (592.4 mg, 4.0 mmol), the molecule 7s was obtained as a yellow oil (443 mg, 58% yield).  $^1\text{H}$ -NMR (400 MHz,  $\text{CDCl}_3$ )  $\delta$  7.31-7.24 (m, 1H), 7.10 (dd,  $J = 24.7, 7.8$  Hz, 4H), 6.95 (d,  $J = 13.7$  Hz, 1H), 2.79

(t,  $J = 7.5$  Hz, 2H), 2.60-2.54 (m, 2H), 2.33 (s, 3H) ppm,  $^{13}\text{C}$  NMR (101 MHz,  $\text{CDCl}_3$ )  $\delta$  141.7, 140.0, 136.6, 136.3, 129.5, 128.3, 33.6, 30.3, 21.1 ppm, IR (KBr) 1648, 1524, 1351  $\text{cm}^{-1}$ ; HRMS (CI) Calcd for  $[\text{C}_{11}\text{H}_{14}\text{NO}_2]^+$  : 192.1025, found 192.1028.

**(R)-3-Hydroxy-4-(1-nitropentan-2-yl)-1-tosylpyridin-2(1H)-one (8a)**

Following the general procedure (C) from **7a** (17.4 mg, 0.16 mmol), the molecule **8a** was obtained as a white solid (28.0 mg, 92% yield) m.p. 141–144 °C;  $^1\text{H}$ -NMR (400 MHz,  $\text{CDCl}_3$ )  $\delta$  8.01 (d,  $J = 8.7$  Hz, 2H), 7.64 (d,  $J = 7.8$  Hz, 1H), 7.38 (d,  $J = 8.3$  Hz, 2H), 6.88 (s, 1H), 6.12 (d,  $J = 7.8$  Hz, 1H), 4.72-4.51 (m, 2H), 3.63-3.55 (m, 1H), 2.46 (s, 3H), 1.77-1.55 (m, 3H), 1.26 (td,  $J = 15.1, 7.3$  Hz, 3H), 0.90 (t,  $J = 7.3$  Hz, 3H) ppm ;  $^{13}\text{C}$  NMR (101 MHz,  $\text{CDCl}_3$ )  $\delta$  156.7, 146.9, 144.5, 132.8, 130.1, 129.8, 126.8, 120.8, 107.7, 38.8, 32.3, 21.9, 20.3, 13.8 ppm ; IR (KBr) 1655, 1550, 1381, 1175  $\text{cm}^{-1}$ ; HRMS (FAB) Calcd for  $[\text{C}_{17}\text{H}_{22}\text{N}_2\text{O}_6\text{S}]^-$  : 381.1120, found 381.1118. The enantioselectivity was determined by chiral HPLC analysis (DAICEL Chiralpak AD-H, hexane : 2-propanol = 80 : 20, flow rate = 0.5 ml/min, 23 °C,  $\lambda = 243$  nm) retention time: minor isomer 75.2 min, major isomer 66.6 min, 96% ee,  $[\alpha]_D^{25} = -3.8$  ( $c$  1.0,  $\text{CHCl}_3$ ).

**(R)-3-Hydroxy-4-(1-nitroheptan-2-yl)-1-tosylpyridin-2(1H)-one (8b)**

Following the general procedure (C) from **7b** (21.6 mg, 0.16 mmol), the molecule **8b** was obtained as a yellow oil (27.4 mg, 84% yield).  $^1\text{H}$ -NMR (400 MHz,  $\text{CDCl}_3$ )  $\delta$  8.01 (d,  $J = 8.7$  Hz, 2H), 7.64 (d,  $J = 7.8$  Hz, 1H), 7.38 (d,  $J = 7.8$  Hz, 2H), 6.82 (d,  $J = 7.8$  Hz, 1H), 6.12 (d,  $J = 7.8$  Hz, 1H), 4.69 (dd,  $J = 12.8, 8.7$  Hz, 1H), 4.53 (q,  $J = 6.4$  Hz, 1H), 3.60-3.52 (m, 1H), 2.46 (s, 3H), 1.76-1.57 (m, 2H), 1.24 (dd,  $J = 7.5, 2.1$  Hz, 7H), 0.85 (t,  $J = 6.6$  Hz, 3H) ppm ;  $^{13}\text{C}$  NMR (101 MHz,  $\text{CDCl}_3$ )  $\delta$  156.7, 146.9, 144.5, 132.8, 130.1, 129.8, 126.8, 120.8, 107.7,



38.8, 32.3, 21.9, 20.3, 13.8 ppm ; IR (KBr) 1655, 1551, 1377, 1175  $\text{cm}^{-1}$ ; HRMS (FAB) Calcd for  $[\text{C}_{19}\text{H}_{25}\text{N}_2\text{O}_6\text{S}]^+$  : 409.1433, found 409.1428. The enantioselectivity was determined by chiral HPLC analysis (DAICEL Chiralpak ID, hexane : 2-propanol = 30 : 70, flow rate = 0.5 ml/min, 23 °C,  $\lambda$  = 243 nm) retention time: minor isomer 26.0 min, major isomer 34.1 min, 97% ee,  $[\alpha]_{\text{D}}^{25} = -7.9$  (*c* 1.0,  $\text{CHCl}_3$ ).

**(R)-3-Hydroxy-4-(1-nitroundecan-2-yl)-1-tosylpyridin-2(1H)-one (8c)**

Following the general procedure (C) from the compound **7c** (31.9 mg, 0.16 mmol), the molecule **8c** was obtained as a clear oil (29.7 mg, 80% yield).  $^1\text{H-NMR}$  (400 MHz,  $\text{CDCl}_3$ )  $\delta$  8.02 (d,  $J$  = 8.2 Hz, 2H), 7.64 (d,  $J$  = 7.8 Hz, 1H), 7.38 (d,  $J$  = 8.2 Hz, 2H), 6.85 (s, 1H), 6.12 (d,  $J$  = 7.8 Hz, 1H), 4.69 (dd,  $J$  = 13.0, 8.5 Hz, 1H), 4.53 (q,  $J$  = 6.4 Hz, 1H), 3.60-3.52 (m, 1H), 2.46 (s, 3H), 1.76-1.58 (m, 2H), 1.26-1.22 (m, 14H), 0.87 (t,  $J$  = 6.9 Hz, 3H)ppm ;  $^{13}\text{C}$  NMR (101 MHz,  $\text{CDCl}_3$ )  $\delta$  156.7, 147.0, 144.5, 132.8, 130.1, 129.8, 126.9, 120.8, 107.8, 39.1, 31.9, 30.2, 29.5, 29.4, 29.3, 27.1, 22.7, 22.0, 14.2 ppm ; IR (KBr) 1654, 1552, 1378, 1176  $\text{cm}^{-1}$ ; HRMS (FAB) Calcd for  $[\text{C}_{23}\text{H}_{33}\text{N}_2\text{O}_6\text{S}]^+$  : 465.2059, found 465.2060. The enantioselectivity was determined by chiral HPLC analysis (DAICEL Chiralpak ID, hexane : 2-propanol = 30 : 70, flow rate = 0.5 ml/min, 23 °C,  $\lambda$  = 243 nm) retention time: minor isomer 30.7 min, major isomer 22.3 min, 97% ee,  $[\alpha]_{\text{D}}^{25} = -5.3$  (*c* 1.0,  $\text{CHCl}_3$ ).

**(R)-3-Hydroxy-4-(4-methyl-1-nitropentan-2-yl)-1-tosylpyridin-2(1H)-one (8d)**

Following the general procedure (C) from the compound **7d** (19.5 mg, 0.16 mmol), the molecule **8d** was obtained as a white solid (27.1 mg, 86% yield), m.p. 152–155 °C;  $^1\text{H-NMR}$  (400 MHz,  $\text{CDCl}_3$ )  $\delta$  8.01 (d,  $J$  = 8.3 Hz, 2H), 7.64 (d,  $J$  = 7.8 Hz, 1H), 7.38 (d,  $J$  = 8.3 Hz, 2H), 6.99 (s, 1H), 6.14 (d,  $J$  = 7.8 Hz, 1H), 4.65 (dd,  $J$  = 12.9, 8.7 Hz, 1H), 4.50 (q,  $J$  = 6.3

Hz, 1H), 3.74-3.67 (m, 1H), 2.45 (s, 3H), 1.77-1.69 (m, 1H), 1.43-1.33 (m, 2H), 0.90 (t,  $J = 6.7$  Hz, 6H) ppm ;  $^{13}\text{C}$  NMR (101 MHz,  $\text{CDCl}_3$ )  $\delta$  156.7, 147.0, 144.7, 135.1, 132.8, 132.5, 130.1, 129.9, 129.8, 126.8, 120.9, 107.6, 91.0, 78.7, 39.1, 36.8, 25.6, 23.3, 21.9, 21.6 ppm ; IR (KBr) 1655, 1551, 1378, 1175  $\text{cm}^{-1}$ ; HRMS (FAB) Calcd for  $[\text{C}_{18}\text{H}_{23}\text{N}_2\text{O}_6\text{S}]^+$  : 395.1277, found 395.1278. The enantioselectivity was determined by chiral HPLC analysis (DAICEL Chiralcel OD-H, hexane : 2-propanol = 95 : 5, flow rate = 0.5 ml/min, 23 °C,  $\lambda = 243$  nm) retention time: minor isomer 87.3 min, major isomer 69.3 min, 96% ee,  $[\alpha]_D^{25} = -4.6$  ( $c$  1.0,  $\text{CHCl}_3$ ).

**(*R*)-3-Hydroxy-4-(3-methyl-1-nitrobutan-2-yl)-1-tosylpyridin-2(1H)-one (8e)**

Following the general procedure (C) from the compound 7e (17.4 mg, 0.16 mmol), the molecule 8e was obtained as a white solid (18.0 mg, 59% yield). m.p. 150–151 °C;  $^1\text{H}$ -NMR (400 MHz,  $\text{CDCl}_3$ )  $\delta$  8.00 (d,  $J = 8.2$  Hz, 2H), 7.61 (d,  $J = 7.8$  Hz, 1H), 7.37 (d,  $J = 8.2$  Hz, 2H), 6.72 (s, 1H), 6.09 (d,  $J = 7.8$  Hz, 1H), 4.63-4.82 (m, 2H), 3.28 (td,  $J = 9.5, 4.6$  Hz, 1H), 2.45 (s, 3H), 1.99-2.12 (m, 1H), 1.02 (d,  $J = 6.9$  Hz, 3H), 0.85 (d,  $J = 6.9$  Hz, 3H) ppm ;  $^{13}\text{C}$  NMR (101 MHz,  $\text{CDCl}_3$ )  $\delta$  156.66, 146.94, 144.58, 132.84, 130.07, 129.83, 126.61, 120.51, 120.47, 108.49, 76.02, 46.20, 29.36, 22.03, 20.92, 20.62 ppm ; IR (KBr) 1654, 1552, 1375, 1174  $\text{cm}^{-1}$ ; HRMS (FAB) Calcd for  $[\text{C}_{17}\text{H}_{21}\text{N}_2\text{O}_6\text{S}]^+$  : 381.1120, found 381.1123. The enantioselectivity was determined by chiral HPLC analysis (DAICEL Chiralpak ID, hexane : EtOH = 30 : 70, flow rate = 0.5 ml/min, 23 °C,  $\lambda = 243$  nm) retention time: minor isomer 103.0 min, major isomer 115.6 min, 99% ee,  $[\alpha]_D^{25} = -22.6$  ( $c$  1.0,  $\text{CHCl}_3$ ).

**(*R*)-4-(1-Cyclohexyl-2-nitroethyl)-3-hydroxy-1-tosylpyridin-2(1H)-one (8f)**

Following the general procedure (C) from the compound 7f (25.8 mg, 0.16 mmol), the

molecule **8f** was obtained as a white solid (21.2 mg, 63% yield), m.p. 191–194 °C; <sup>1</sup>H-NMR (400 MHz, CDCl<sub>3</sub>) δ 8.00 (d, *J* = 8.3 Hz, 2H), 7.59 (d, *J* = 8.3 Hz, 1H), 7.37 (d, *J* = 7.3 Hz, 2H), 6.63 (s, 1H), 6.07 (d, *J* = 7.8 Hz, 1H), 4.77 (t, *J* = 11.5 Hz, 1H), 4.66 (dd, *J* = 13.1, 4.8 Hz, 1H), 3.35-3.29 (m, 1H), 2.45 (s, 3H), 1.77-1.49 (m, 6H), 1.24-0.90 (m, 6H) ppm ; <sup>13</sup>C NMR (101 MHz, CDCl<sub>3</sub>) δ 156.7, 146.9, 144.5, 132.9, 130.1, 129.8, 126.7, 120.4, 108.6, 75.8, 45.1, 38.6, 31.1, 30.9, 26.0, 22.0 ppm ; IR (KBr) 1653, 1550, 1376, 1175, cm<sup>-1</sup>; HRMS (FAB) Calcd for [C<sub>20</sub>H<sub>25</sub>N<sub>2</sub>O<sub>6</sub>S]<sup>+</sup> : 421.1433, found 421.1424. The enantioselectivity was determined by chiral HPLC analysis (DAICEL Chiralpak OJ-H, hexane : EtOH = 90 : 10, flow rate = 0.5 ml/min, 23 °C, λ = 243 nm) retention time: minor isomer 60.3 min, major isomer 68.1 min, 84% ee, [α]<sub>D</sub><sup>25</sup> = -3.8 (*c* 1.0, CHCl<sub>3</sub>).

**(*R*)-3-Hydroxy-4-(2-nitro-1-phenylethyl)-1-tosylpyridin-2(1H)-one (8h)**

Following the general procedure (C) from the compound **7h** (36.5 mg, 0.16 mmol), the molecule **8h** as obtained as a white solid (20.3 mg, 62% yield). m.p. 68.3–72.7 °C; <sup>1</sup>H-NMR (400 MHz, CDCl<sub>3</sub>) δ 7.98 (d, *J* = 8.7 Hz, 2H), 7.59 (d, *J* = 7.8 Hz, 1H), 7.26-7.39 (m, 7H), 7.00 (s, 1H), 6.09 (d, *J* = 7.8 Hz, 1H), 5.08-5.14 (m, 1H), 4.90-4.96 (m, 2H), 2.44 (s, 3H) ppm ; <sup>13</sup>C NMR (101 MHz, CDCl<sub>3</sub>) δ 156.8, 147.0, 144.0, 136.5, 132.7, 130.1, 129.8, 129.4, 128.5, 127.8, 126.2, 121.1, 107.5, 76.2, 44.0, 22.0 ppm ; IR (KBr) 1685, 1557, 1379, 1178 cm<sup>-1</sup>; HRMS (FAB) Calcd for [C<sub>20</sub>H<sub>19</sub>N<sub>2</sub>O<sub>6</sub>S]<sup>+</sup> : 415.0964, found 415.0964. The enantioselectivity was determined by chiral HPLC analysis (DAICEL Chiralcel OD-H, hexane : 2-propanol = 70 : 30, flow rate = 0.5 ml/min, 23 °C, λ = 243 nm) retention time: minor isomer 103.0 min, major isomer 115.6 min, 39% ee, [α]<sub>D</sub><sup>25</sup> = -9.08 (*c* 1.0, CHCl<sub>3</sub>).

**(*R*)-4-(1-(4-Bromophenyl)-2-nitroethyl)-3-hydroxy-1-tosylpyridin-2(1H)-one (8i)**

Following the general procedure (C) from the compound **7i** (55 mg, 0.16 mmol), the molecule **8i** was obtained as a white solid (22 mg, 56% yield), m.p. 125.4–129.5 °C; <sup>1</sup>H-NMR (400 MHz, CDCl<sub>3</sub>) δ 7.98 (d, *J* = 8.2 Hz, 2H), 7.60 (d, *J* = 7.8 Hz, 1H), 7.45 (d, *J* = 8.2 Hz, 2H), 7.36 (d, *J* = 7.8 Hz, 2H), 7.15 (d, *J* = 7.8 Hz, 2H), 6.94 (s, 1H), 6.05 (d, *J* = 7.8 Hz, 1H), 4.84-5.09 (m, 3H), 2.44 (s, 3H) ppm ; <sup>13</sup>C NMR (101 MHz, CDCl<sub>3</sub>) δ 156.7, 147.1, 144.0, 135.6, 132.6, 132.5, 130.1, 129.8, 129.5, 125.5, 122.5, 121.3, 107.2, 76.0, 43.6, 22.0 ppm ; IR (KBr) 1649, 1553, 1360, 1175 cm<sup>-1</sup>; HRMS (FAB) Calcd for [C<sub>20</sub>H<sub>18</sub>BrN<sub>2</sub>O<sub>6</sub>S]<sup>+</sup> : 493.0063, found 493.0078. The enantioselectivity was determined by chiral HPLC analysis (DAICEL Chiralcel OD-H, hexane : 2-propanol = 50 : 50, flow rate = 0.5 ml/min, 23 °C, λ = 240 nm) retention time: minor isomer 35.8 min, major isomer 43.6 min, 70% ee, [α]<sup>25</sup><sub>D</sub> = -3.14 (*c* 1.0, CHCl<sub>3</sub>).

**(R)-3-Hydroxy-4-(2-nitro-1-(4-nitrophenyl)ethyl)-1-tosylpyridin-2(1H)-one (8j)**

Following the general procedure (C) from the compound **7j** (47.5 mg, 0.16 mmol), the molecule **8j** was obtained as a white solid (18.7 mg, 51% yield), m.p. 138.8–142.3 °C; <sup>1</sup>H-NMR (400 MHz, CDCl<sub>3</sub>) δ 8.19 (d, *J* = 8.2 Hz, H, 7.98 (d, *J* = 7.8 Hz, 2H), 7.63 (d, *J* = 7.8 Hz, 1H), 7.47 (d, *J* = 8.7 Hz, 2H), 7.36 (d, *J* = 7.8 Hz, 2H), 6.98 (s, 1H), 6.07 (d, *J* = 7.8 Hz, 1H), 5.00-5.15 (m, 3H), 2.44 (s, 3H) ppm ; <sup>13</sup>C NMR (101 MHz, CDCl<sub>3</sub>) δ 156.6, 147.8, 147.3, 144.3, 143.8, 132.5, 130.2, 129.9, 128.9, 124.5, 121.6, 106.9, 75.6, 43.8, 22.0 ppm ; IR (KBr) 1648, 1554, 1522, 1347, 1175 cm<sup>-1</sup>; HRMS (FAB) Calcd for [C<sub>20</sub>H<sub>18</sub>N<sub>3</sub>O<sub>8</sub>S]<sup>+</sup>: 460.0815, found 460.0792. The enantioselectivity was determined by chiral HPLC analysis (DAICEL Chiralcel OD-H, hexane : 2-propanol : trifluoroacetic acid = 700 : 300 : 1, flow rate = 0.5 ml/min, 23 °C, λ = 240 nm) retention time: minor isomer 80.4 min, major isomer 94.7 min, 68% ee, [α]<sup>25</sup><sub>D</sub> = -9.6 (*c* 1.0, CHCl<sub>3</sub>).

**(R)-3-Hydroxy-4-(1-nitro-3-phenylpropan-2-yl)-1-tosylpyridin-2(1H)-one (8k)**

Following the general procedure (C) from the compound **7k** (24.6 mg, 0.16 mmol), the molecule **8k** was obtained as a white solid (28.0 mg, 82% yield), m.p. 68–71 °C; <sup>1</sup>H-NMR (400 MHz, CDCl<sub>3</sub>) δ 8.02 (d, *J* = 8.3 Hz, 2H), 7.60 (d, *J* = 7.8 Hz, 1H), 7.41 (d, *J* = 8.3 Hz, 2H), 7.33-7.24 (m, 4H), 7.16 (d, *J* = 6.4 Hz, 2H), 6.91 (s, 1H), 6.07 (d, *J* = 7.8 Hz, 1H), 4.83 (dd, *J* = 13.6, 9.0 Hz, 1H), 4.57 (dd, *J* = 13.3, 5.5 Hz, 1H), 3.83 (qd, *J* = 8.3, 5.6 Hz, 1H), 3.03 (ddd, *J* = 30.1, 13.8, 8.0 Hz, 2H), 2.49 (s, 3H) ppm; <sup>13</sup>C NMR (101 MHz, CDCl<sub>3</sub>) δ 156.7, 147.0, 144.3, 137.2, 132.8, 130.0, 129.8, 128.9, 128.9, 127.2, 126.5, 120.8, 108.2, 76.0, 41.4, 36.2, 31.7, 22.8, 22.0, 14.2 ppm; IR (KBr) 1656, 1551, 1376, 1175 cm<sup>-1</sup>; HRMS (FAB) Calcd for [C<sub>21</sub>H<sub>21</sub>N<sub>2</sub>O<sub>6</sub>S]<sup>+</sup>: 429.1120, found 429.1127. The enantioselectivity was determined by chiral HPLC analysis (DAICEL Chiralcel OD-H, hexane : 2-propanol = 70 : 30, flow rate = 0.5 ml/min, 23 °C, λ = 243 nm) retention time: minor isomer 28.4 min, major isomer 37.5 min, 99% ee, [α]<sub>D</sub><sup>25</sup> = -11.0 (*c* 1.0, CHCl<sub>3</sub>).

**(R)-4-(1-(4-Chlorophenyl)-3-nitropropan-2-yl)-3-hydroxy-1-tosylpyridin-2(1H)-one (8l)**

Following the general procedure (C) from the compound **7l** (48.4 mg, 0.16 mmol), the molecule **8l** was obtained as a brown solid (29.7 mg, 80% yield), m.p. 66–71 °C; <sup>1</sup>H-NMR (400 MHz, CDCl<sub>3</sub>) δ 7.97 (d, *J* = 8.2 Hz, 2H), 7.55 (d, *J* = 7.8 Hz, 1H), 7.37 (d, *J* = 8.2 Hz, 2H), 7.21 (d, *J* = 8.7 Hz, 2H), 7.03 (d, *J* = 8.2 Hz, 2H), 6.85 (s, 1H), 5.97 (d, *J* = 7.8 Hz, 1H), 4.51-4.79 (m, 2H), 3.70-3.77 (m, 1H), 2.90-3.02 (m, 2H), 2.45 (s, 3H) ppm; <sup>13</sup>C NMR (101 MHz, CDCl<sub>3</sub>) δ 156.6, 147.0, 144.4, 135.7, 133.1, 132.8, 130.3, 130.0, 129.9, 129.0, 125.9, 120.9, 108.1, 76.0, 41.3, 35.4, 22.0 ppm; IR (KBr) 1654, 1552, 1377, 1175 cm<sup>-1</sup>; HRMS (FAB) Calcd for [C<sub>21</sub>H<sub>20</sub>ClN<sub>2</sub>O<sub>6</sub>S]<sup>+</sup>: 463.0731, found 463.0721. The enantioselectivity was determined by chiral HPLC analysis (DAICEL Chiralcel OD-H, hexane : 2-propanol : trifluoroacetic acid =

700 : 300 : 1, flow rate = 0.5 ml/min, 23 °C,  $\lambda$  = 240 nm) retention time: major isomer 28.9 min, minor isomer 36.4 min, 99% ee,  $[\alpha]^{25}_{\text{D}} = -104.9$  (*c* 1.0, CHCl<sub>3</sub>).

**(R)-3-Hydroxy-4-(1-nitro-3-(p-tolyl)propan-2-yl)-1-tosylpyridin-2(1H)-one (8m)**

Following the general procedure (C) from the compound **7m** (43.4 mg, 0.16 mmol), the molecule **8m** was obtained as a brown solid (33.6 mg, 95% yield), m.p. 132.9–137.6 °C; <sup>1</sup>H-NMR (400 MHz, CDCl<sub>3</sub>)  $\delta$  7.98 (d, *J* = 8.2 Hz, 2H), 7.56 (d, *J* = 7.8 Hz, 1H), 7.37 (d, *J* = 8.2 Hz, 2H), 7.06 (d, *J* = 7.8 Hz, 2H), 7.00 (d, *J* = 8.2 Hz, 2H), 6.87 (s, 1H), 6.04 (d, *J* = 7.8 Hz, 1H), 4.48-4.80 (m, 2H), 3.73-3.80 (m, 1H), 2.93 (m, 2H), 2.45 (s, 3H), 2.30 (s, 3H) ppm ; <sup>13</sup>C NMR (101 MHz, CDCl<sub>3</sub>)  $\delta$  156.7, 147.0, 144.3, 136.8, 134.0, 132.8, 130.0, 129.8, 129.6, 128.8, 126.7, 120.7, 108.2, 76.0, 41.4, 35.8, 22.0, 21.1 ppm ; IR (KBr) 1656, 1552, 1377, 1175 cm<sup>-1</sup>; HRMS (FAB) Calcd for [C<sub>22</sub>H<sub>23</sub>N<sub>2</sub>O<sub>6</sub>S]<sup>+</sup> : 443.1277, found 443.1284. The enantioselectivity was determined by chiral HPLC analysis (DAICEL Chiralpak ID, hexane : 2-propanol = 50 : 50, flow rate = 0.5 ml/min, 23 °C,  $\lambda$  = 243 nm) retention time: minor isomer 52.3 min, major isomer 67.0 min, 98% ee,  $[\alpha]^{25}_{\text{D}} = -75.0$  (*c* 1.0, CHCl<sub>3</sub>).

**(R)-3-Hydroxy-4-(1-nitro-3-(p-tolyl)propan-2-yl)-1-tosylpyridin-2(1H)-one (8n)**

Following the general procedure (C) from the compound **7n** (48.4 mg, 0.16 mmol), the molecule **8n** was obtained as a yellow solid (33.0 mg, 90% yield), m.p. 69.6–72.7 °C; <sup>1</sup>H-NMR (400 MHz, CDCl<sub>3</sub>)  $\delta$  7.98 (d, *J* = 7.8 Hz, 2H), 7.55 (d, *J* = 7.8 Hz, 1H), 7.37 (d, *J* = 8.2 Hz, 2H), 7.02 (d, *J* = 8.7 Hz, 2H), 6.83 (s, 1H), 6.78 (d, *J* = 8.7 Hz, 2H), 6.02 (d, *J* = 7.8 Hz, 1H), 4.49-4.79 (m, 2H), 3.70-3.80 (m, 4H), 2.92 (m, 2H), 2.44 (s, 3H) ppm ; <sup>13</sup>C NMR (101 MHz, CDCl<sub>3</sub>)  $\delta$  158.7, 156.66, 147.0, 144.3, 132.8, 130.0, 130.0, 129.8, 129.1, 126.6, 120.7, 114.2, 108.2, 77.5, 77.1, 76.8, 76.0, 55.3, 41.6, 35.4, 22.0 ppm ; IR (KBr) 1657, 1552, 1377, 1175

cm<sup>-1</sup>; HRMS (FAB) Calcd for [C<sub>22</sub>H<sub>23</sub>N<sub>2</sub>O<sub>7</sub>S]<sup>+</sup> : 459.1226, found 459.1221. The enantioselectivity was determined by chiral HPLC analysis (DAICEL Chiralpak ID, hexane : 2-propanol = 50 : 50, flow rate = 0.5 ml/min, 23 °C, λ = 240 nm) retention time: minor isomer 75.5 min, major isomer 92.3 min, 98% ee, [α]<sup>25</sup><sub>D</sub> = -77.9 (c 1.0, CHCl<sub>3</sub>).

**(R)-3-Hydroxy-4-(1-nitro-4-phenylbutan-2-yl)-1-tosylpyridin-2(1H)-one (8o)**

Following the general procedure (C) from the compound **7o** (26.7 mg, 0.16 mmol), the molecule **8o** was obtained as a white solid (31.9 mg, 90% yield), m.p. 110–112 °C; <sup>1</sup>H-NMR (400 MHz, CDCl<sub>3</sub>) δ 8.02 (d, *J* = 8.3 Hz, 2H), 7.64 (d, *J* = 7.8 Hz, 1H), 7.37 (d, *J* = 8.3 Hz, 2H), 7.27-7.23 (m, 2H), 7.19-7.15 (m, 1H), 7.11-7.09 (m, 2H), 7.04 (s, 1H), 6.11 (d, *J* = 7.8 Hz, 1H), 4.73-4.52 (m, 2H), 3.61-3.54 (m, 1H), 2.58-2.53 (m, 2H), 2.44 (s, 3H), 2.16-1.91 (m, 2H) ppm ; <sup>13</sup>C NMR (101 MHz, CDCl<sub>3</sub>) δ 156.6, 147.0, 144.7, 140.4, 132.8, 130.2, 129.9, 128.6, 128.4, 126.5, 126.4, 120.9, 108.0, 38.9, 33.3, 31.7, 22.0 ppm ; IR (KBr) 1653, 1551, 1377, 1175 cm<sup>-1</sup>; HRMS (FAB) Calcd for [C<sub>22</sub>H<sub>23</sub>N<sub>2</sub>O<sub>6</sub>S]<sup>+</sup> : 443.1277, found 443.1273. The enantioselectivity was determined by chiral HPLC analysis (DAICEL Chiralcel OD-H, hexane : 2-propanol = 30 : 70, flow rate = 0.5 ml/min, 23 °C, λ = 243 nm) retention time: minor isomer 32.5 min, major isomer 44.0 min, 99% ee, [α]<sup>25</sup><sub>D</sub> = -5.5 (c 1.0, CHCl<sub>3</sub>).

**(R)-4-(4-(4-Fluorophenyl)-1-nitrobutan-2-yl)-3-hydroxy-1-tosylpyridin-2(1H)-one (8p)**

Following the general procedure (C) from the compound **7p** (29.4 mg, 0.16 mmol), the molecule **8p** was obtained as a white solid (31.0 mg, 84% yield), m.p. 124–126 °C; <sup>1</sup>H-NMR (400 MHz, CDCl<sub>3</sub>) δ 8.03 (d, *J* = 8.3 Hz, 2H), 7.65 (d, *J* = 7.8 Hz, 1H), 7.40 (d, *J* = 8.3 Hz, 2H), 7.05 (td, *J* = 6.0, 2.6 Hz, 2H), 6.97-6.92 (m, 2H), 6.09 (d, *J* = 7.8 Hz, 1H), 4.72-4.52 (m, 2H), 3.58-3.50 (m, 1H), 2.56-2.50 (m, 2H), 2.47 (s, 3H), 2.14-1.87 (m, 2H) ppm ; <sup>13</sup>C NMR

(101 MHz, CDCl<sub>3</sub>)  $\delta$  161.44 (d,  $J$  = 244.7 Hz, CF), 156.5, 147.2, 147.0, 144.5, 135.9, 132.6, 130.0, 129.8, 129.7, 129.6, 125.9, 120.9, 115.4, 115.2, 107.8, 77.2, 38.8, 32.4, 31.6, 21.9, 14.1 ppm ; IR (KBr) 1655, 1551, 1376, 1175 cm<sup>-1</sup>; HRMS (FAB) Calcd for [C<sub>22</sub>H<sub>22</sub>FN<sub>2</sub>O<sub>6</sub>S]<sup>+</sup> : 461.1183, found 461.1184. The enantioselectivity was determined by chiral HPLC analysis (DAICEL Chiralpak OJ-H, hexane : 2-propanol = 50 : 50, flow rate = 0.5 ml/min, 23 °C,  $\lambda$  = 243 nm) retention time: minor isomer 71.3 min, major isomer 85.1 min, > 99% ee,  $[\alpha]_{\text{D}}^{25} = -19.0$  ( $c$  1.0, CHCl<sub>3</sub>).

**(R)-4-(4-(4-Chlorophenyl)-1-nitrobutan-2-yl)-3-hydroxy-1-tosylpyridin-2(1H)-one (8q)**

Following the general procedure (C) from the compound **7q** (29.4 mg, 0.16 mmol), the molecule **8q** was obtained as a white solid (32.4 mg, 85% yield), m.p. 48–51 °C; <sup>1</sup>H-NMR (400 MHz, CDCl<sub>3</sub>)  $\delta$  8.03 (d,  $J$  = 8.3 Hz, 2H), 7.65 (d,  $J$  = 7.8 Hz, 1H), 7.39 (d,  $J$  = 8.3 Hz, 2H), 7.23 (dt,  $J$  = 8.9, 2.3 Hz, 2H), 7.03 (d,  $J$  = 8.7 Hz, 2H), 6.92 (s, 1H), 6.10 (d,  $J$  = 7.8 Hz, 1H), 4.69 (dd,  $J$  = 13.1, 8.5 Hz, 1H), 4.55 (q,  $J$  = 6.6 Hz, 1H), 3.58-3.51 (m, 1H), 2.55-2.49 (m, 2H), 2.46 (s, 3H), 2.14-1.88 (m, 2H)ppm ; <sup>13</sup>C NMR (101 MHz, CDCl<sub>3</sub>)  $\delta$  156.6, 147.1, 144.7, 138.8, 132.7, 132.2, 130.1, 129.9, 129.7, 128.8, 126.0, 121.0, 107.8, 38.8, 32.6, 31.5, 29.8, 22.0 ppm ; IR (KBr) 1653, 1551, 1377, 1175 cm<sup>-1</sup>; HRMS (FAB) Calcd for [C<sub>22</sub>H<sub>22</sub>ClN<sub>2</sub>O<sub>6</sub>S]<sup>+</sup> : 477.0887, found 477.0884. The enantioselectivity was determined by chiral HPLC analysis (DAICEL Chiralpak ID, hexane : 2-propanol = 30 : 70, flow rate = 0.5 ml/min, 23 °C,  $\lambda$  = 243 nm) retention time: minor isomer 40.4 min, major isomer 55.4 min, 99% ee,  $[\alpha]_{\text{D}}^{25} = -25.0$  ( $c$  1.0, CHCl<sub>3</sub>)

**(R)-4-(4-(4-Bromophenyl)-1-nitrobutan-2-yl)-3-hydroxy-1-tosylpyridin-2(1H)-one (8r)**

Following the general procedure (C) from the compound **7r** (38.6 mg, 0.16 mmol), the



molecule **8r** was obtained as a brown solid (38.4 mg, 92% yield), m.p. 48–51 °C; <sup>1</sup>H-NMR (400 MHz, CDCl<sub>3</sub>) δ 8.02 (d, *J* = 8.3 Hz, 2H), 7.64 (d, *J* = 7.8 Hz, 1H), 7.35-7.39 (m, 5H), 6.94-6.97 (m, 2H), 6.79 (d, *J* = 23.9 Hz, 1H), 6.08 (d, *J* = 7.8 Hz, 1H), 4.50-4.71 (m, 2H), 3.49-3.56 (m, 1H), 2.41-2.51 (m, 2H), 2.45 (s, 3H), 1.83-2.12 (m, 2H) ppm ; <sup>13</sup>C NMR (101 MHz, CDCl<sub>3</sub>) δ 156.6, 147.1, 144.7, 138.8, 132.7, 132.2, 130.1, 129.9, 129.7, 128.8, 126.0, 121.0, 107.8, 38.8, 32.6, 31.5, 29.8, 22.0 ppm ; IR (KBr) 1653, 1551, 1377, 1175 cm<sup>-1</sup>; HRMS (FAB) Calcd for [C<sub>22</sub>H<sub>22</sub>ClN<sub>2</sub>O<sub>6</sub>S]<sup>+</sup> : 477.0887, found 477.0884. The enantioselectivity was determined by chiral HPLC analysis (DAICEL Chiralpak ID, hexane : 2-propanol = 30 : 70, flow rate = 0.5 ml/min, 23 °C, λ = 243 nm) retention time: minor isomer 40.4 min, major isomer 55.4 min, 97% ee, [α]<sub>D</sub><sup>25</sup> = -25.0 (*c* 1.0, CHCl<sub>3</sub>)

**(R)-3-Hydroxy-4-(1-nitro-4-(*p*-tolyl)butan-2-yl)-1-tosylpyridin-2(1H)-one (8s)**

Following the general procedure (C) from the compound **7s** (28.8 mg, 0.16 mmol), the molecule **8s** was obtained as a white solid (34.7 mg, 95% yield), m.p. 135 °C; <sup>1</sup>H-NMR (400 MHz, CDCl<sub>3</sub>) δ 8.03 (d, *J* = 8.3 Hz, 2H), 7.65 (t, *J* = 3.9 Hz, 1H), 7.39 (d, *J* = 8.3 Hz, 2H), 7.08 (d, *J* = 7.8 Hz, 2H), 6.99 (d, *J* = 8.3 Hz, 2H), 6.88 (s, 1H), 6.11 (d, *J* = 7.8 Hz, 1H), 4.73-4.51 (m, 2H), 3.59-3.52 (m, 1H), 2.56-2.49 (m, 2H), 2.46 (s, 3H), 2.32 (d, *J* = 7.3 Hz, 3H), 2.14-1.89 (m, 2H) ppm ; <sup>13</sup>C NMR (101 MHz, CDCl<sub>3</sub>) δ 156.7, 147.0, 144.6, 137.3, 136.0, 132.8, 130.1, 129.9, 129.3, 128.2, 126.4, 120.9, 108.1, 38.9, 32.8, 31.8, 22.0, 21.1 ppm ; IR (KBr) 1655, 1550, 1376, 1175 cm<sup>-1</sup>; HRMS (FAB) Calcd for [C<sub>22</sub>H<sub>22</sub>N<sub>2</sub>O<sub>6</sub>S]<sup>+</sup> : 457.1433, found 457.1437. The enantioselectivity was determined by chiral HPLC analysis (DAICEL Chiralpak ID, hexane : 2-propanol = 30 : 70, flow rate = 0.5 ml/min, 23 °C, λ = 243 nm) retention time: minor isomer 39.0 min, major isomer 50.5 min, 99% ee, [α]<sub>D</sub><sup>25</sup> = -2.3 (*c* 1.0, CHCl<sub>3</sub>).

**(R)-3-Hydroxy-4-(4-(4-methoxyphenyl)-1-nitrobutan-2-yl)-1-tosylpyridin-2(1H)-one (8t)**

Following the general procedure (C) from the compound **7t** (31.3 mg, 0.16 mmol), the molecule **8t** was obtained as a white solid (35.5 mg, 94% yield), m.p. 136–138 °C; <sup>1</sup>H-NMR (400 MHz, CDCl<sub>3</sub>) δ 8.04 (t, *J* = 8.7 Hz, 2H), 7.64 (d, *J* = 7.8 Hz, 1H), 7.39 (d, *J* = 8.3 Hz, 2H), 7.03-7.01 (m, 2H), 6.89 (s, 1H), 6.81 (dd, *J* = 6.6, 2.1 Hz, 2H), 6.10 (t, *J* = 7.1 Hz, 1H), 4.73-4.51 (m, 2H), 3.79 (d, *J* = 4.6 Hz, 3H), 3.58-3.51 (m, 1H), 2.54-2.49 (m, 2H), 2.46 (s, 3H), 2.13-1.87 (m, 2H) ppm; <sup>13</sup>C NMR (101 MHz, CDCl<sub>3</sub>) δ 158.2, 156.7, 147.0, 144.6, 132.8, 132.4, 130.1, 129.9, 129.3, 126.4, 120.9, 114.0, 108.1, 55.4, 38.9, 32.3, 31.9, 31.7, 22.8, 22.0, 14.2 ppm; IR (KBr) 1655, 1550, 1376, 1175 cm<sup>-1</sup>; HRMS (FAB) Calcd for [C<sub>23</sub>H<sub>25</sub>N<sub>2</sub>O<sub>6</sub>S]<sup>+</sup>: 473.1382, found 473.1388. The enantioselectivity was determined by chiral HPLC analysis (DAICEL Chiralpak ID, hexane : 2-propanol = 50 : 50, flow rate = 0.5 ml/min, 23 °C, λ = 243 nm) retention time: minor isomer 124.3 min, major isomer 173.0 min, 97% ee, [α]<sub>D</sub><sup>25</sup> = -5.1 (*c* 1.0, CHCl<sub>3</sub>).

**(R)-4-(1-Nitro-4-phenylbutan-2-yl)-2-oxo-1-tosyl-1,2-dihydropyridin-3-yl trifluoromethanesulfonate (9)**

To a solution of compound **8o** (500 mg, 1.13 mmol) and pyridine (225 μL, 2.82 mmol) dissolved in dry dichloromethane (11 mL) was added trifluoromethanesulfonic anhydride (285 μL, 1.70 mmol) slowly under argon atmosphere at 0°C. The reaction mixture was stirred for 5 min. After the reaction was finished, the mixture was quenched with water, extracted with dichloromethane. The organic phase was washed with brine, dried over anhydrous MgSO<sub>4</sub>, filtered, and concentrated *in vacuo*. Purification of the residue by flash column chromatography (ethyl acetate/ hexane, 1/4. v/v) to afford compound **9** as a white solid (650 mg, >99% yield),

m.p. 65.4–70.8 °C; <sup>1</sup>H-NMR (400 MHz, CDCl<sub>3</sub>) δ 8.02-8.07 (m, 3H), 7.38 (d, *J* = 8.3 Hz, 2H), 7.24 (t, *J* = 7.4 Hz, 2H), 7.14-7.18 (m, 1H), 7.07 (d, *J* = 6.9 Hz, 2H), 6.10 (d, *J* = 7.8 Hz, 1H), 4.46-4.56 (m, 2H), 3.75-3.82 (m, 1H), 2.49-2.64 (m, 2H), 2.46 (s, 3H), 2.19-1.80 (2H) ppm ; <sup>13</sup>C NMR (151 MHz, CDCl<sub>3</sub>) δ 154.0, 147.4, 144.4, 139.5, 138.7, 132.1, 131.1, 130.4, 130.0, 128.8, 128.2, 126.8, 118.6 (q, *J* = 321.3 Hz, CF<sub>3</sub>), 102.2, 76.9, 37.1, 33.1, 32.8, 22.0 ppm ; <sup>19</sup>F NMR (376 MHz, CDCl<sub>3</sub>) δ -71.97 ppm ; IR (KBr) 1685, 1557, 1379, 1178 cm<sup>-1</sup>; HRMS (FAB) Calcd for [C<sub>23</sub>H<sub>22</sub>F<sub>3</sub>N<sub>3</sub>O<sub>8</sub>S<sub>2</sub>]<sup>+</sup> : 575.0770, found 575.0766; [α]<sup>25</sup><sub>D</sub> = +76.4 (*c* 1.0, CHCl<sub>3</sub>).

**(*R*)-4-(1-Nitro-4-phenylbutan-2-yl)-2-oxo-1,2-dihydropyridin-3-yl trifluoromethanesulfonate (10)**

Compound **9** (250 mg, 0.44 mmol), bis(triphenylphosphine)palladium(II) dichloride (30.5 mg, 0.044 mmol), 1,3-bis(diphenylphosphino)propane (35.9 mg, 0.087 mmol) and dimethylformamide (10 mL) was added to glass screw vial charged with argon gas. The reaction mixture was stirred for 10 min and to the solution was added tributylamine (415 μL, 1.74 mmol) and formic acid (49 μL, 1.31 mmol). The mixture was stirred for another 1 hours at 80 °C. After the reaction was finished, the mixture was diluted with dichloromethane, washed with water and brine, dried over anhydrous MgSO<sub>4</sub>, filtered, and concentrated *in vacuo*. Purification of the residue by flash column chromatography (ethyl acetate/ hexane, 90/10. v/v) to afford compound **10** as a white solid (165 mg, 90% yield), m.p. 51.9–55.4 °C; <sup>1</sup>H-NMR (400 MHz, CD<sub>3</sub>OD) δ 7.44 (d, *J* = 6.9 Hz, 1H), 7.22 (t, *J* = 7.3 Hz, 2H), 7.13 (dd, *J* = 14.2, 7.8 Hz, 3H), 6.48 (d, *J* = 6.9 Hz, 1H), 4.71-4.89 (m, 2H), 3.80-3.88 (m, 1H), 2.46-2.63 (m, 2H), 1.86-2.10 (m, 2H) ppm ; <sup>13</sup>C NMR (151 MHz, CDCl<sub>3</sub>) δ 158.0, 145.0, 139.7, 138.2, 134.7, 128.8, 126.7, 118.7 (q, *J* = 320.8 Hz, CF<sub>3</sub>), 103.7, 77.5, 36.8, 33.2, 33.0 ppm ; <sup>19</sup>F NMR (376 MHz, CDCl<sub>3</sub>) δ -72.43 ppm ; IR (KBr) 1667, 1557, 1378, 1137 cm<sup>-1</sup>; HRMS (FAB) Calcd for

$[\text{C}_{16}\text{H}_{16}\text{F}_3\text{N}_2\text{O}_6\text{S}]^+ : 421.0681$ , found  $421.0668$ ;  $[\alpha]_{\text{D}}^{25} = +57.8$  ( $c$  1.0,  $\text{CHCl}_3$ ).

**(R)-4-(1-Nitro-4-phenylbutan-2-yl)pyridine-2,3-diyl bis(trifluoromethanesulfonate) (11)**

To a solution of compound **10** (124 mg, 0.30 mmol) and pyridine (59  $\mu\text{L}$ , 0.74 mmol) dissolved in dry dichloromethane (3 mL) was added trifluoromethanesulfonic anhydride (74  $\mu\text{L}$ , 0.44 mmol) slowly under argon atmosphere at 0 °C. The reaction mixture was stirred for 5 min. After the reaction was finished, the mixture was quenched with water, extracted with dichloromethane. The organic phase was washed with brine, dried over anhydrous  $\text{MgSO}_4$ , filtered, and concentrated *in vacuo*. Purification of the residue by flash column chromatography (Ethyl acetate/ hexane, 1/3. v/v) to afford compound **11** as a yellow oil (105.3 mg, 65% yield);  $^1\text{H-NMR}$  (400 MHz,  $\text{CDCl}_3$ )  $\delta$  8.35 (d,  $J = 5.0$  Hz, 1H), 7.33 (d,  $J = 5.0$  Hz, 1H), 7.25-7.28 (m, 2H), 7.18-7.22 (m, 1H), 7.06 (d,  $J = 6.9$  Hz, 2H), 4.57-4.68 (m, 2H), 4.00 (dt,  $J = 14.9, 6.9$  Hz, 1H), 2.52-2.66 (m, 2H), 2.00-2.21 (m, 2H) ppm ;  $^{13}\text{C NMR}$  (151 MHz,  $\text{CDCl}_3$ )  $\delta$  148.7, 148.3, 147.2, 139.2, 132.6, 128.9, 128.2, 126.9, 122.9, 118.5 (q,  $J = 321.0$  Hz,  $\text{CF}_3$ ), 118.4 (q,  $J = 321.0$  Hz,  $\text{CF}_3$ ), 77.7, 36.8, 34.2, 33.0 ppm ;  $^{19}\text{F NMR}$  (376 MHz,  $\text{CDCl}_3$ )  $\delta$  -72.04, 72.26 ppm ; IR (KBr) 1559, 1378, 1150  $\text{cm}^{-1}$ ; HRMS (FAB) Calcd for  $[\text{C}_{17}\text{H}_{15}\text{F}_6\text{N}_2\text{O}_8\text{S}_2]^+ : 553.0174$ , found 553.0180.  $[\alpha]_{\text{D}}^{25} = +13.4$  ( $c$  1.0,  $\text{CHCl}_3$ ).

**(R)-4-(1-Nitro-4-phenylbutan-2-yl)-2-phenylpyridin-3-yl trifluoromethanesulfonate (12)**

Compound **11** (10.3 mg, 0.018 mmol),  $\text{Pd}(\text{dppf})\text{Cl}_2 \cdot \text{CH}_2\text{Cl}_2$  (4.4 mg, 0.0054 mmol), phenyl boronic acid (6.6 mg, 0.054 mmol) and sodium carbonate (17.5 mg, 0.054 mmol) dissolved in 1,4-dioxane (0.5 mL) and water (0.1 mL) was added to a glass microwave vial. The reaction mixture was heated to 100 °C under microwave irradiation for 1 h. The resulting mixture was quenched with water, extracted with dichloromethane. The organic phase was washed with

brine, dried over anhydrous MgSO<sub>4</sub>, filtered, and concentrated *in vacuo*. Purification of the residue by flash column chromatography (ethyl acetate/ hexane, 1/3. v/v) to afford compound **12** as a pale yellow oil (5.6 mg, 62% yield), <sup>1</sup>H-NMR (400 MHz, CD<sub>3</sub>OD) δ 9.92 (d, *J* = 5.5 Hz, 1H), 8.92 (d, *J* = 5.5 Hz, 1H), 8.88-8.90 (m, 2H), 8.76-8.79 (m, 3H), 8.51-8.55 (m, 2H), 8.44 (dd, *J* = 7.0, 5.4 Hz, 3H), 6.19 (ddd, *J* = 73.6, 13.7, 7.3 Hz, 2H), 5.28-5.35 (m, 1H), 3.86-3.99 (m, 2H), 3.34-3.53 (m, 2H) ppm ; <sup>13</sup>C NMR (201 MHz, CD<sub>3</sub>OD) δ 13C-NMR (201 MHz, CD<sub>3</sub>OD) δ 153.8, 149.0, 145.5, 142.0, 140.3, 135.6, 129.5, 129.2, 128.2, 128.0, 126.0, 122.2, 118.0 (q, *J* = 320.0 Hz, CF<sub>3</sub>) 78.0, 36.9, 34.2, 32.8 ppm ; <sup>19</sup>F NMR (376 MHz, CDCl<sub>3</sub>) δ -73.15 ppm ; IR (KBr) 1553, 1375, 1039 cm<sup>-1</sup>; HRMS (FAB) Calcd for [C<sub>22</sub>H<sub>20</sub>F<sub>3</sub>N<sub>2</sub>O<sub>5</sub>S]<sup>+</sup> : 481.1045, found 481.1041. [ $\alpha$ ]<sub>D</sub><sup>25</sup> = +47.8 (*c* 1.0, CH<sub>3</sub>OH).

#### (4) References

- (1) Medina, S.; Harper, M. J.; Balmond, E. I.; Miranda, S.; Crisenza, G. E. M.; Coe, D. M.; McGarrigle, E. M.; Galan, M. C. Stereoselective Glycosylation of 2-Nitrogalactals Catalyzed by a Bifunctional Organocatalyst. *Org. Lett.* **2016**, *18* (17), 4222–4225. <https://doi.org/10.1021/acs.orglett.6b01962>.
- (2) Vakulya, B.; Varga, S.; Csámpai, A.; Soós, T. Highly Enantioselective Conjugate Addition of Nitromethane to Chalcones Using Bifunctional Cinchona Organocatalysts. *Org. Lett.* **2005**, *7* (10), 1967–1969. <https://doi.org/10.1021/ol050431s>.
- (3) Malerich, J. P.; Hagihara, K.; Rawal, V. H. Chiral Squaramide Derivatives Are Excellent Hydrogen Bond Donor Catalysts. *J. Am. Chem. Soc.* **2008**, *130* (44), 14416–14417. <https://doi.org/10.1021/ja805693p>.
- (4) Woong Lee, J.; Hi Ryu, T.; Suk Oh, J.; Yong Bae, H.; Bin Jang, H.; Eui Song, C. Self-Association-Free Dimeric Cinchona Alkaloid Organocatalysts: Unprecedented Catalytic

Activity, Enantioselectivity and Catalyst Recyclability in Dynamic Kinetic Resolution of Racemic Azlactones. *Chem. Commun.* **2009**, No. 46, 7224. <https://doi.org/10.1039/b917882a>.

- (5) Böhm, M.; Lorthiois, E.; Meyyappan, M.; Vasella, A. Synthesis and Evaluation as Glycosidase Inhibitors of Isoquinuclidines Mimicking a Distorted  $\beta$ -Mannopyranoside. *Helv. Chim. Acta* **2003**, 86 (11), 3787–3817. <https://doi.org/10.1002/hlca.200390320>.

## (5) $^1\text{H}$ & $^{13}\text{C}$ NMR Spectra

$^1\text{H}$ -NMR of compound (6)

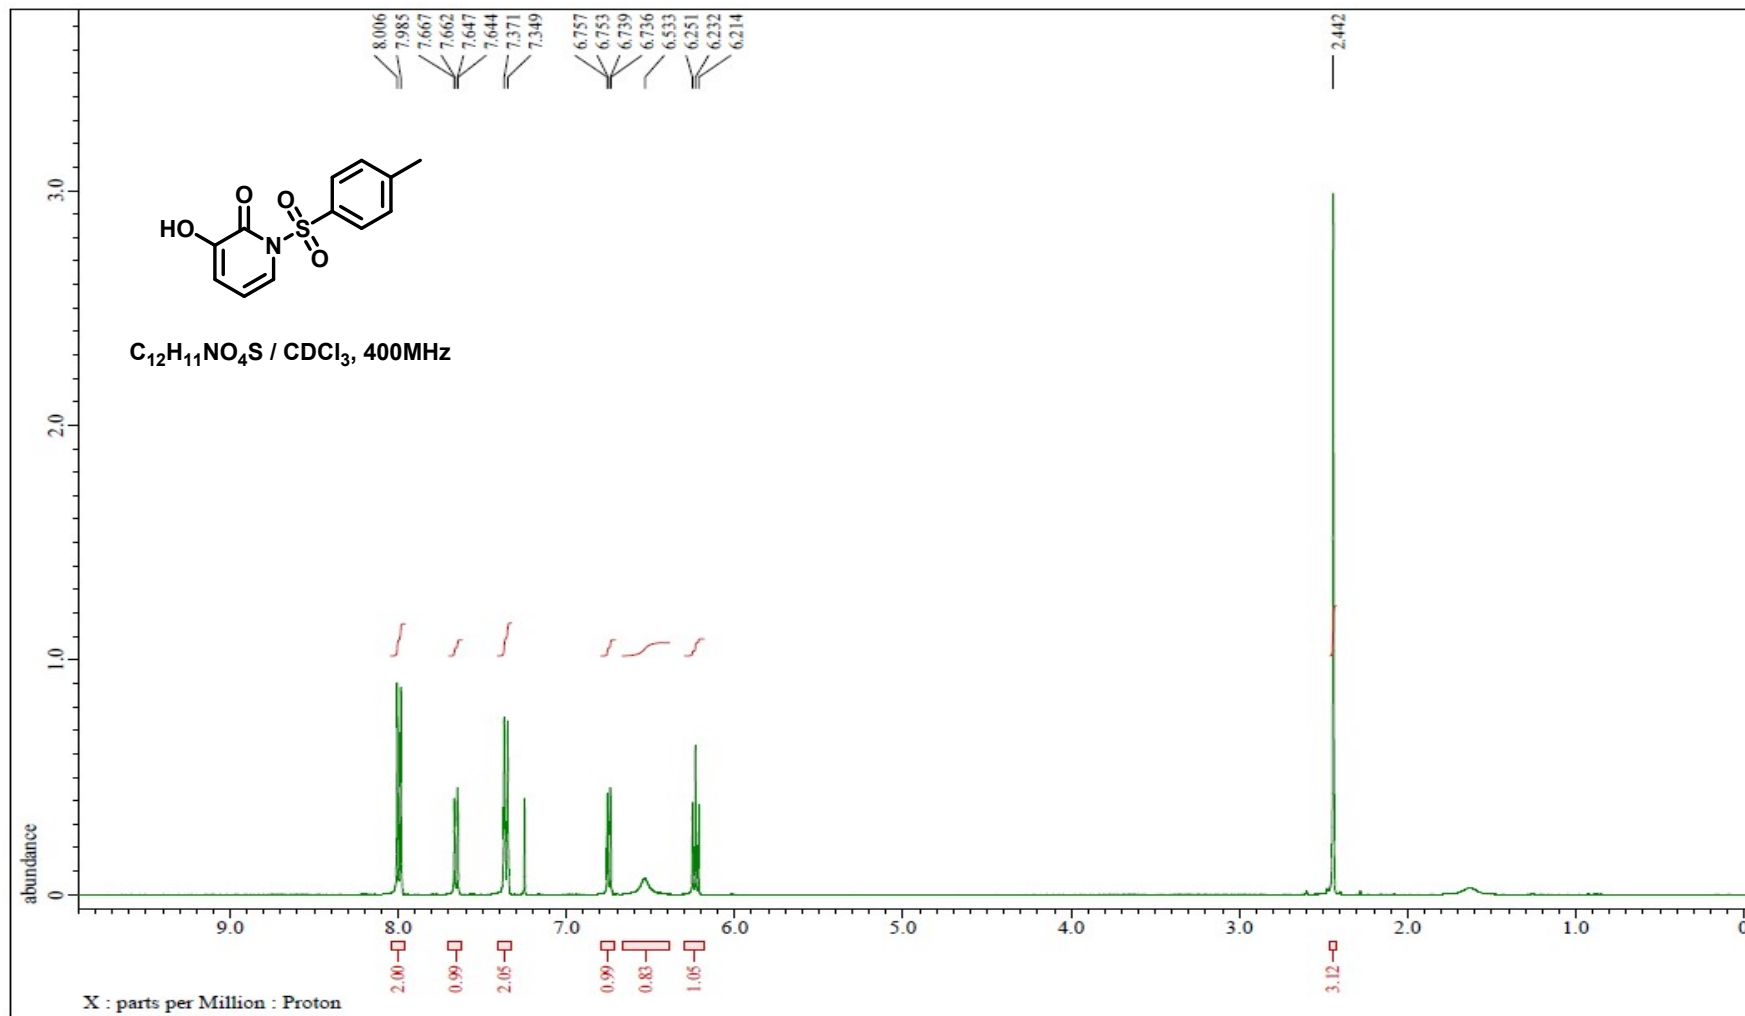

<sup>13</sup>C-NMR of compound (6)

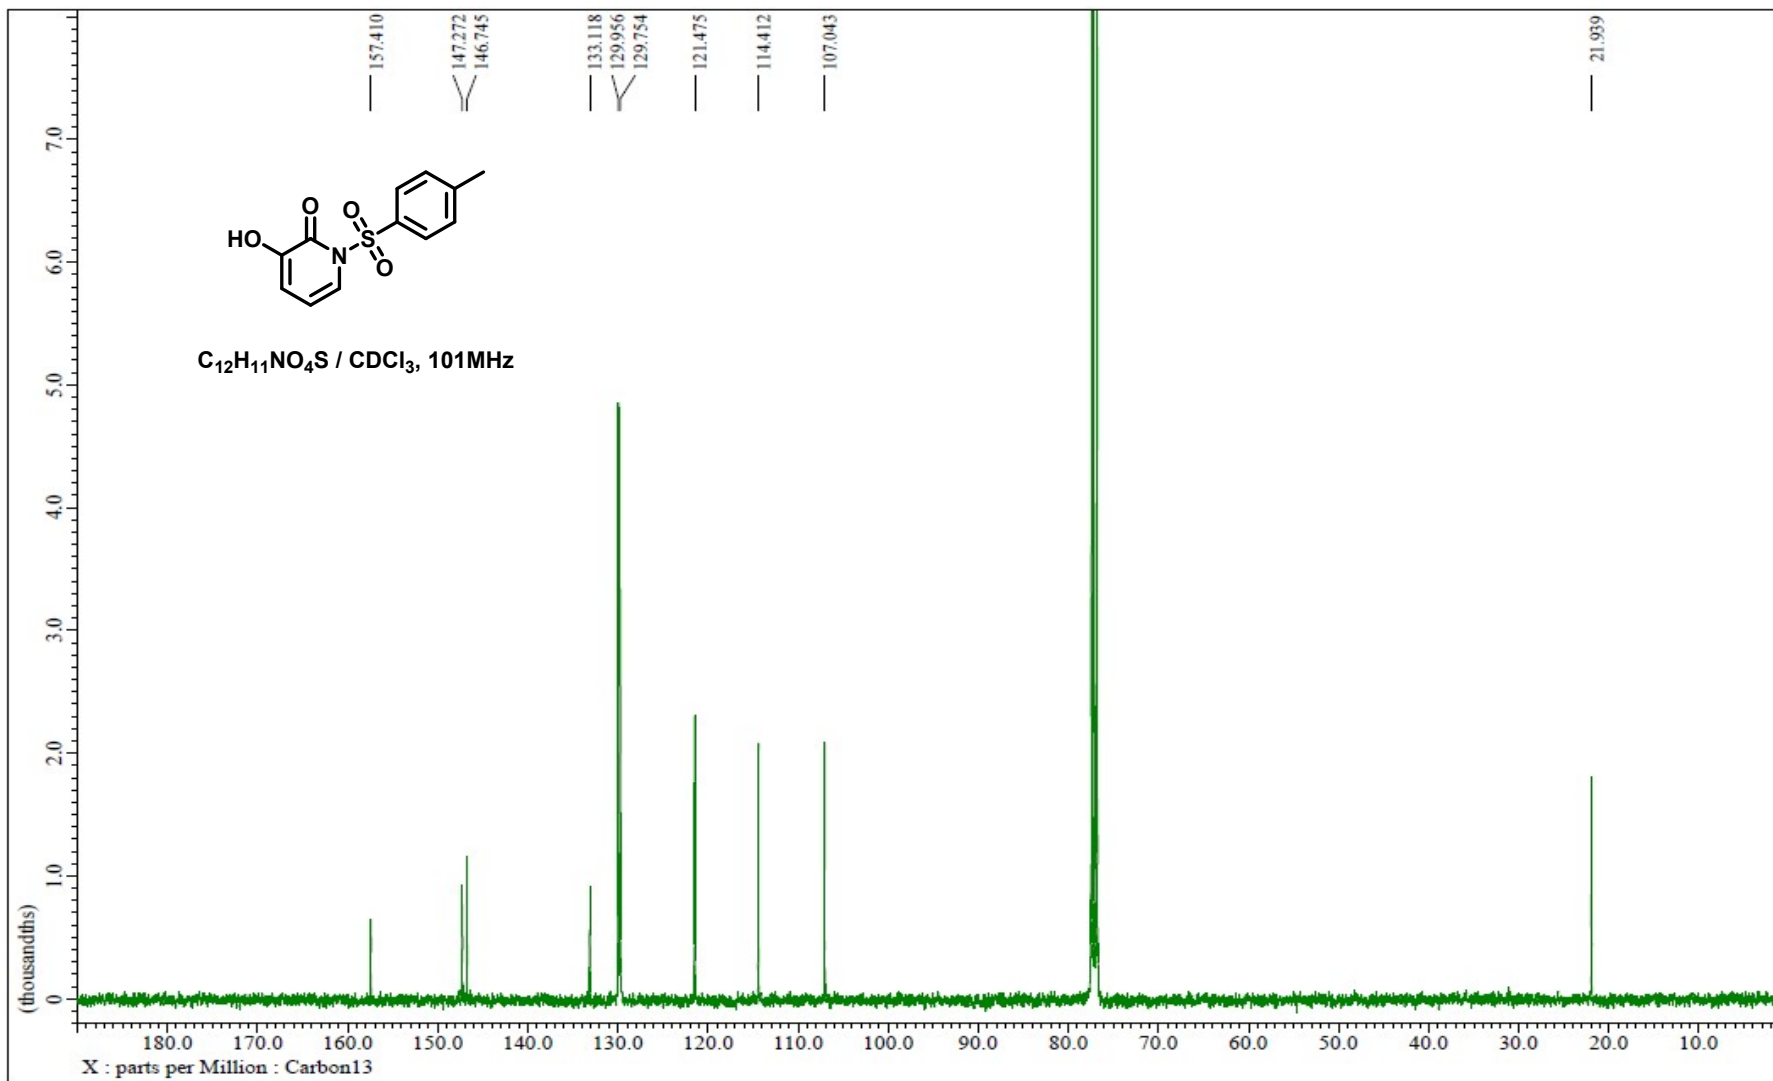



<sup>1</sup>H-NMR of compound (6a)

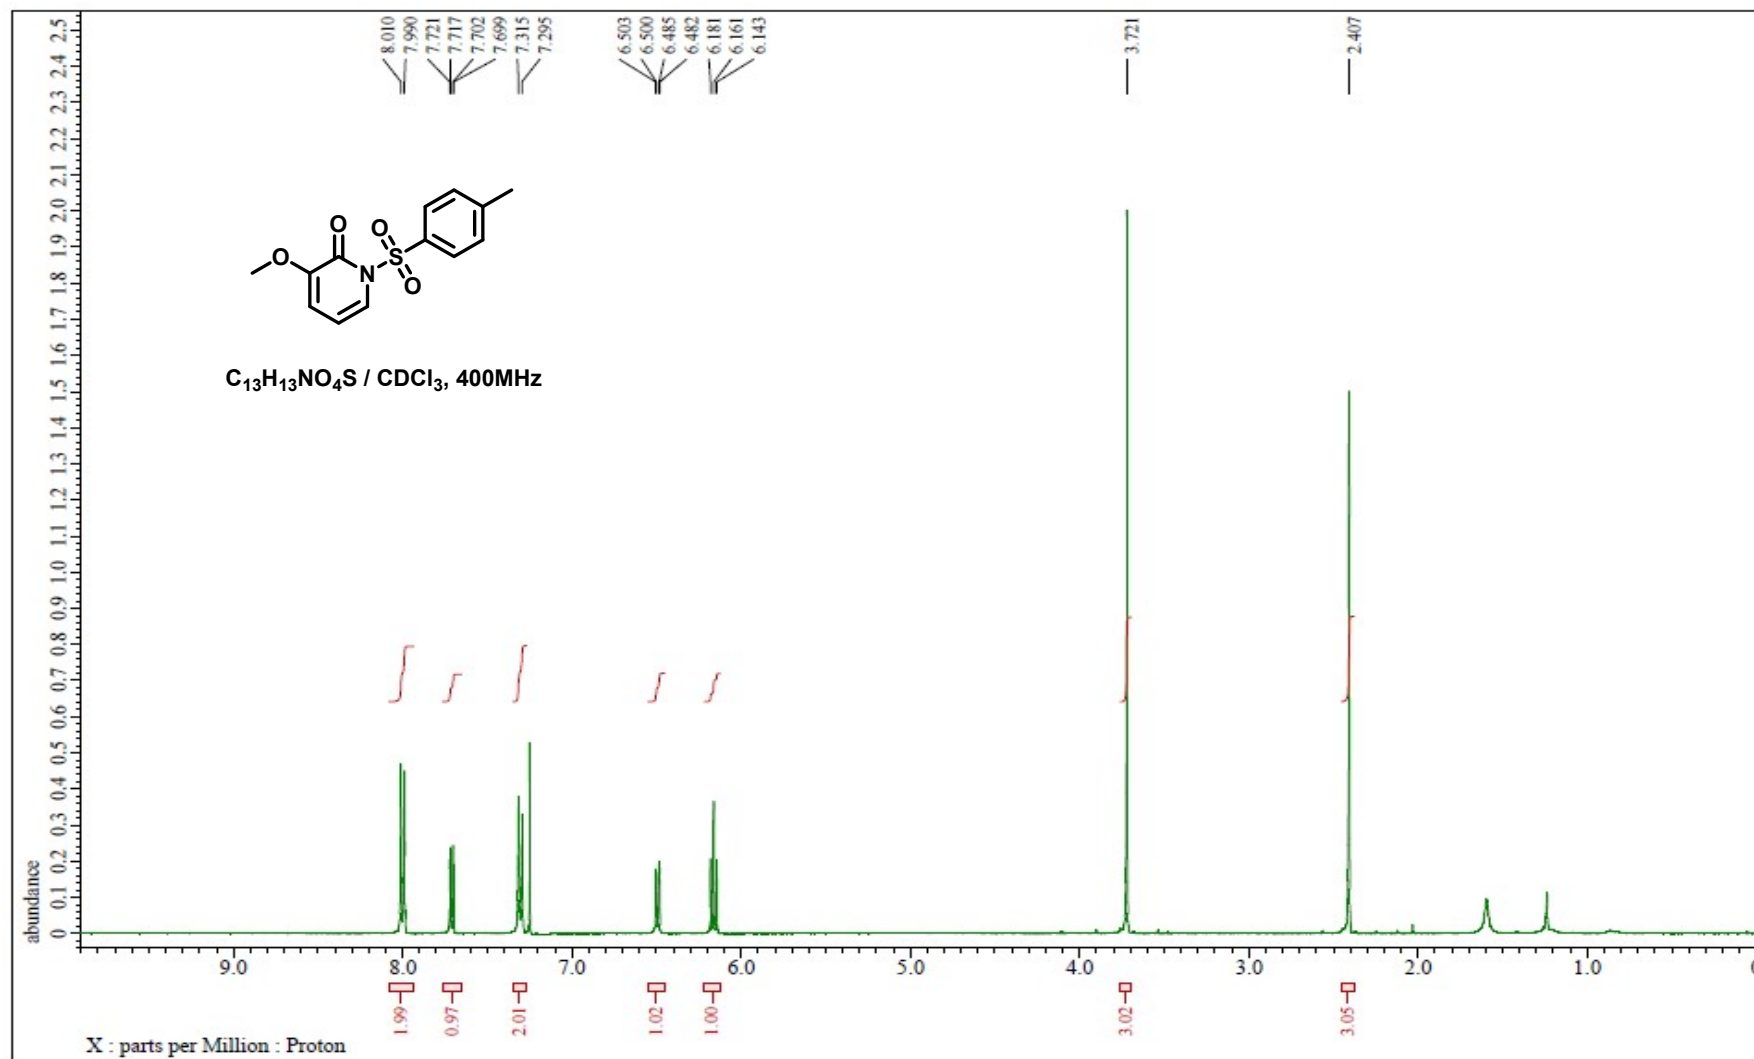

*<sup>13</sup>C -NMR of compound (6a)*

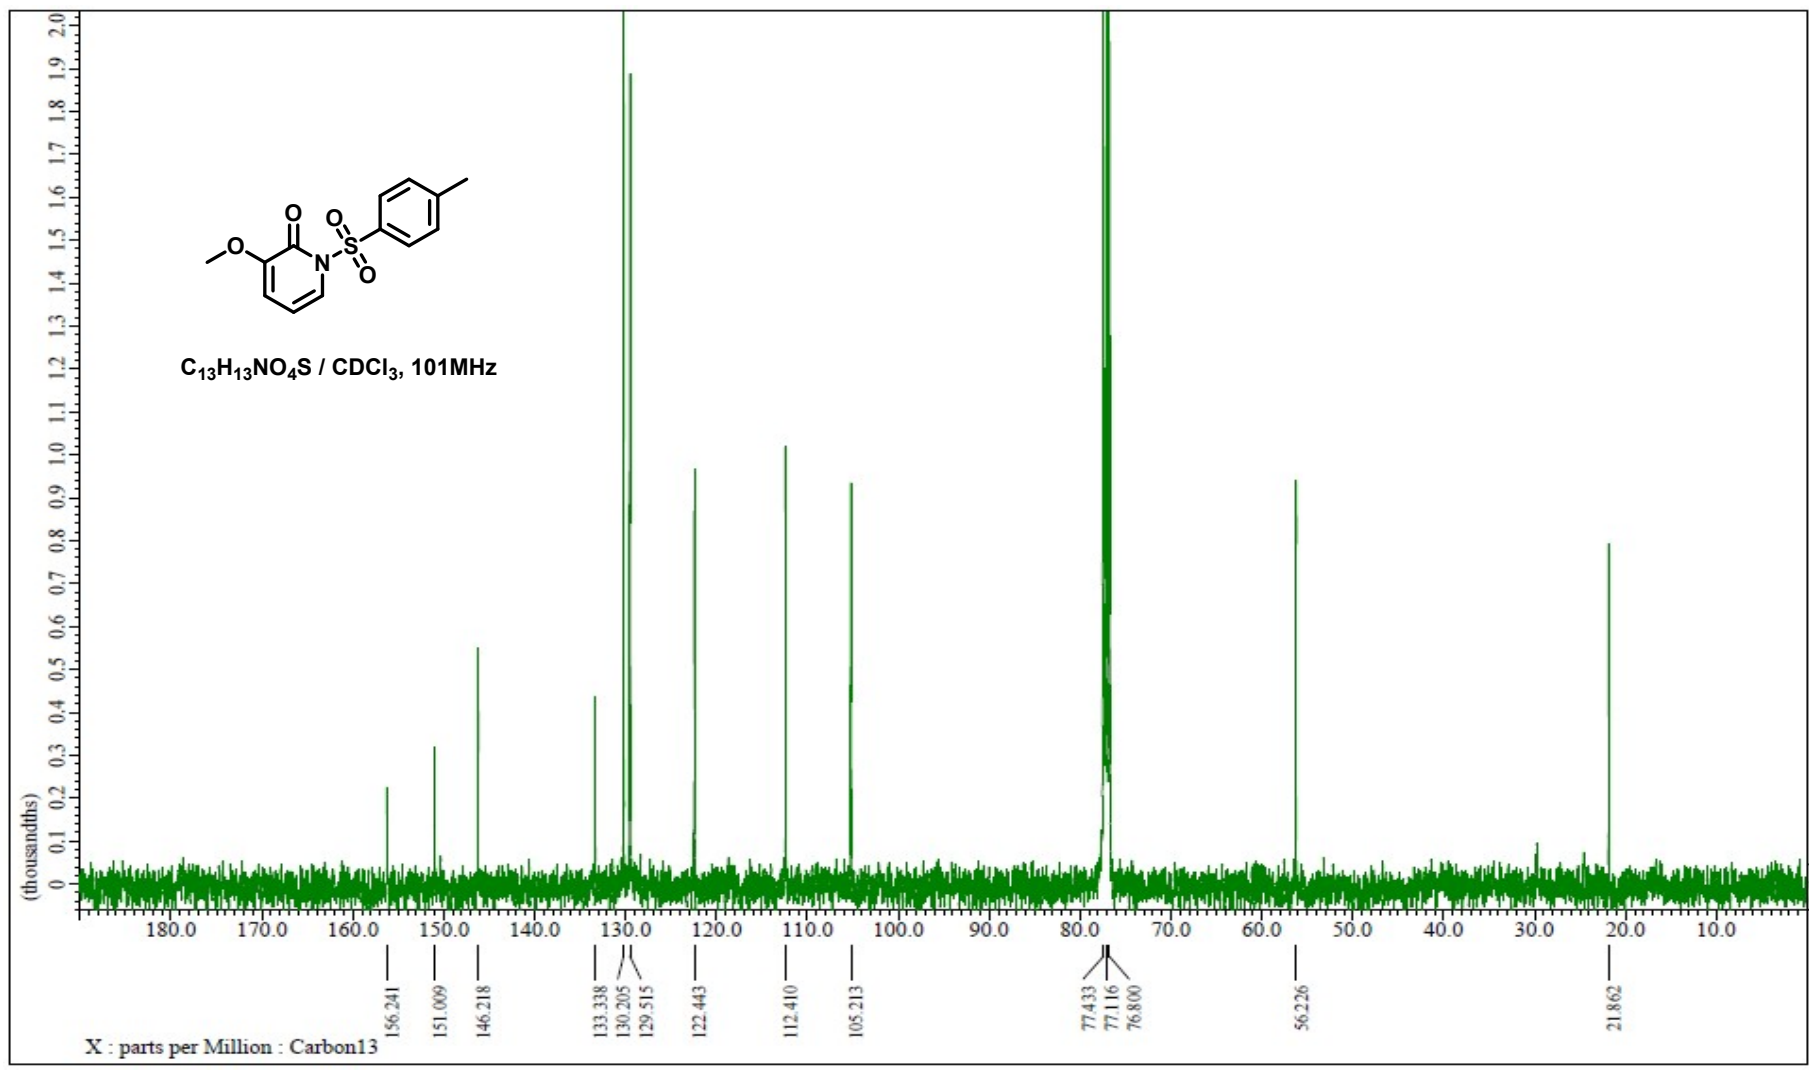

*<sup>1</sup>H-NMR of compound (6b)*

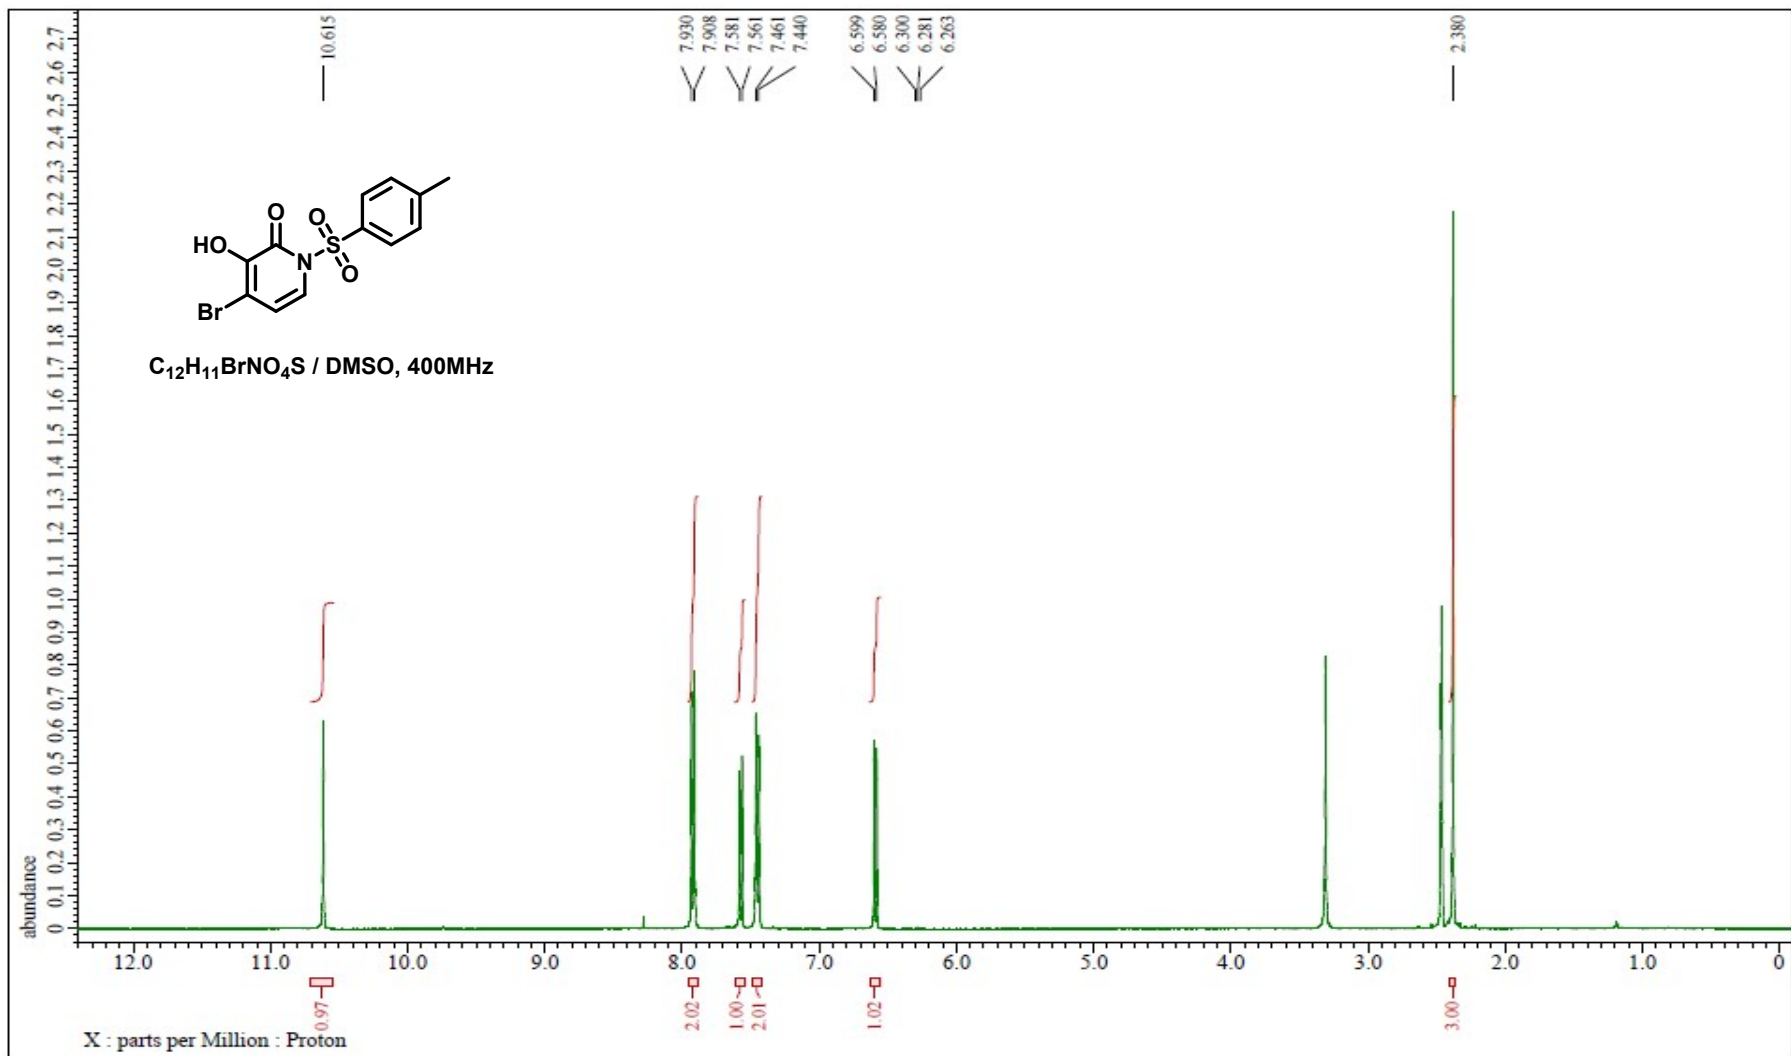

*<sup>13</sup>C -NMR of compound (6b)*

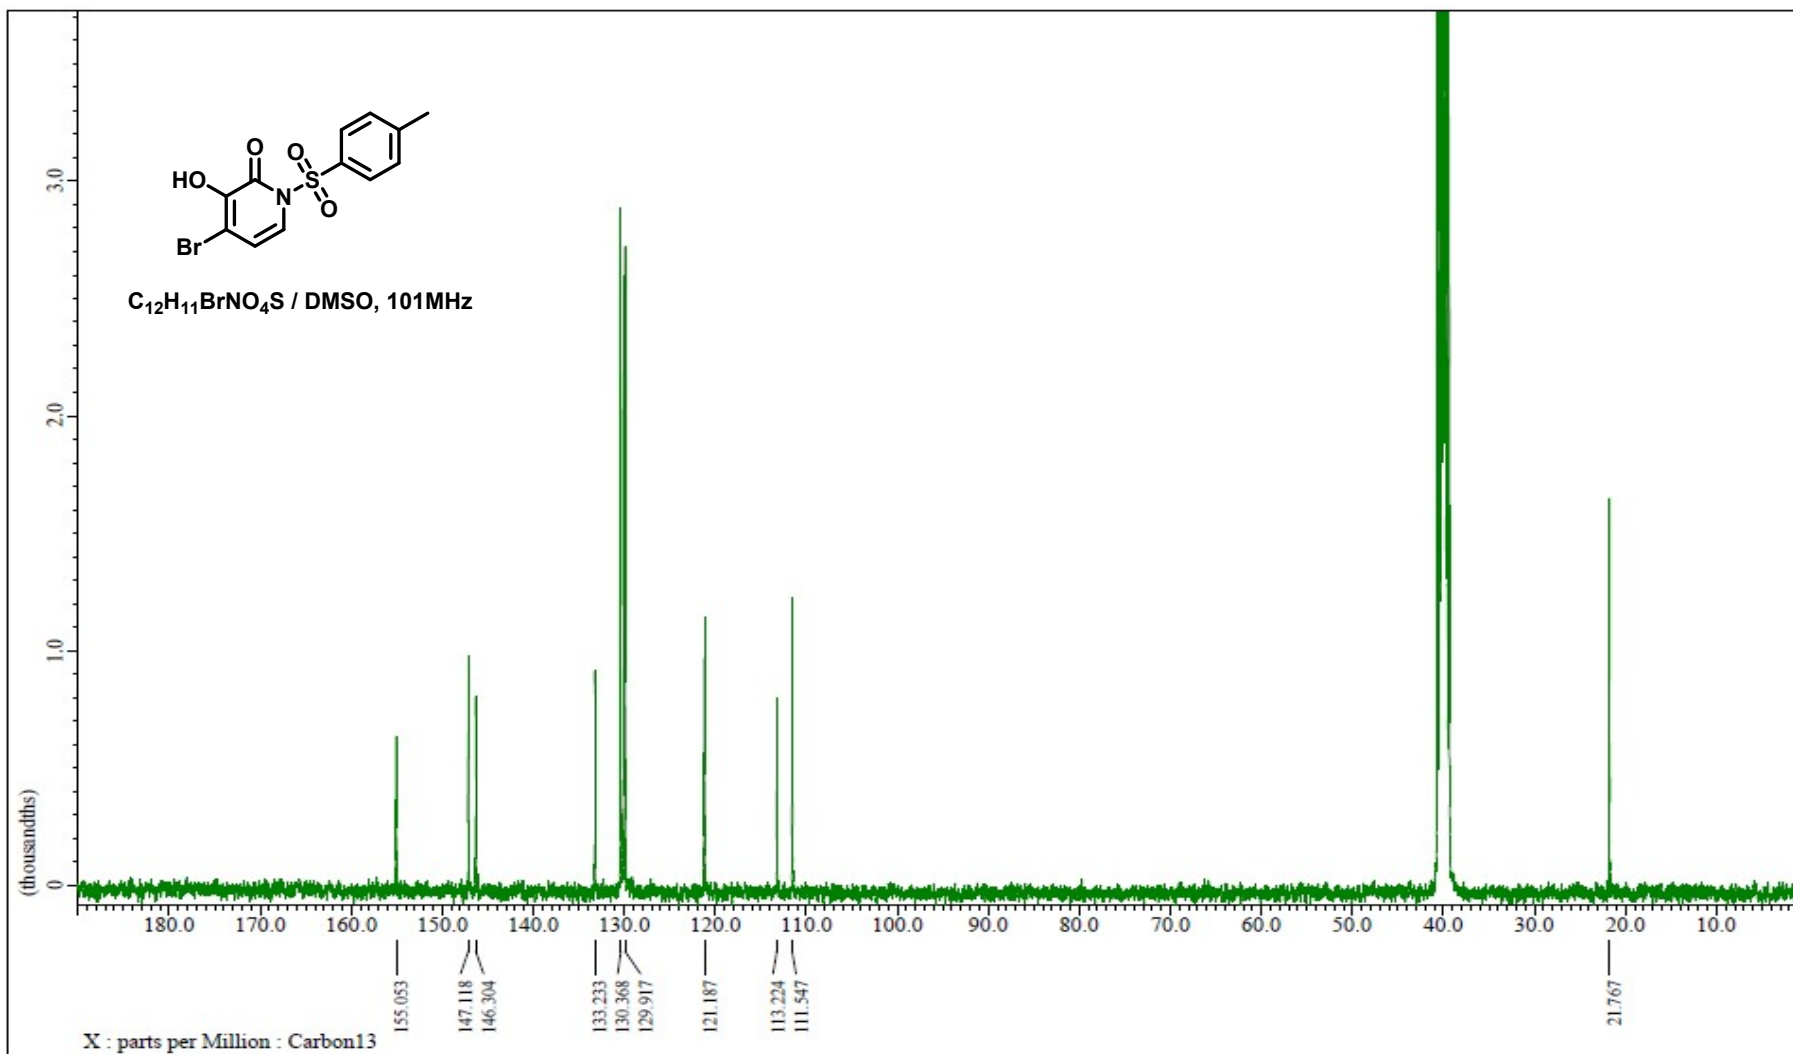

<sup>1</sup>H-NMR of compound (7a)

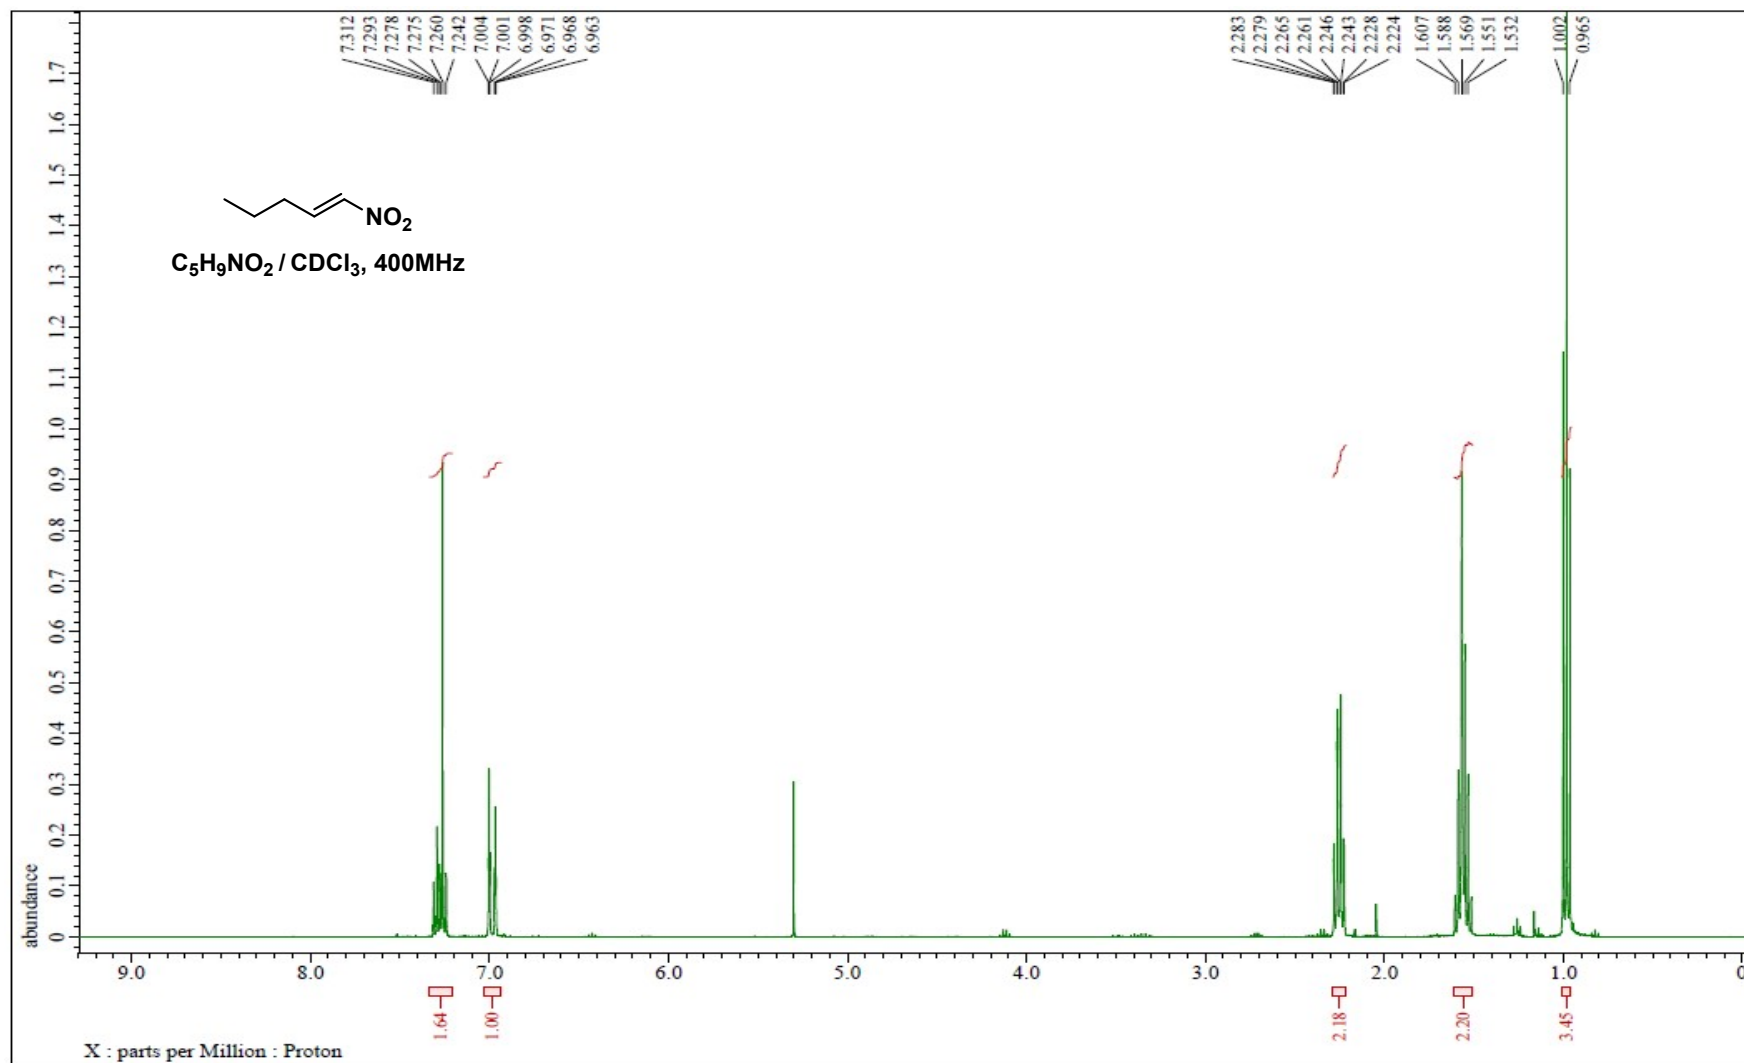



<sup>1</sup>H-NMR of compound (7b)

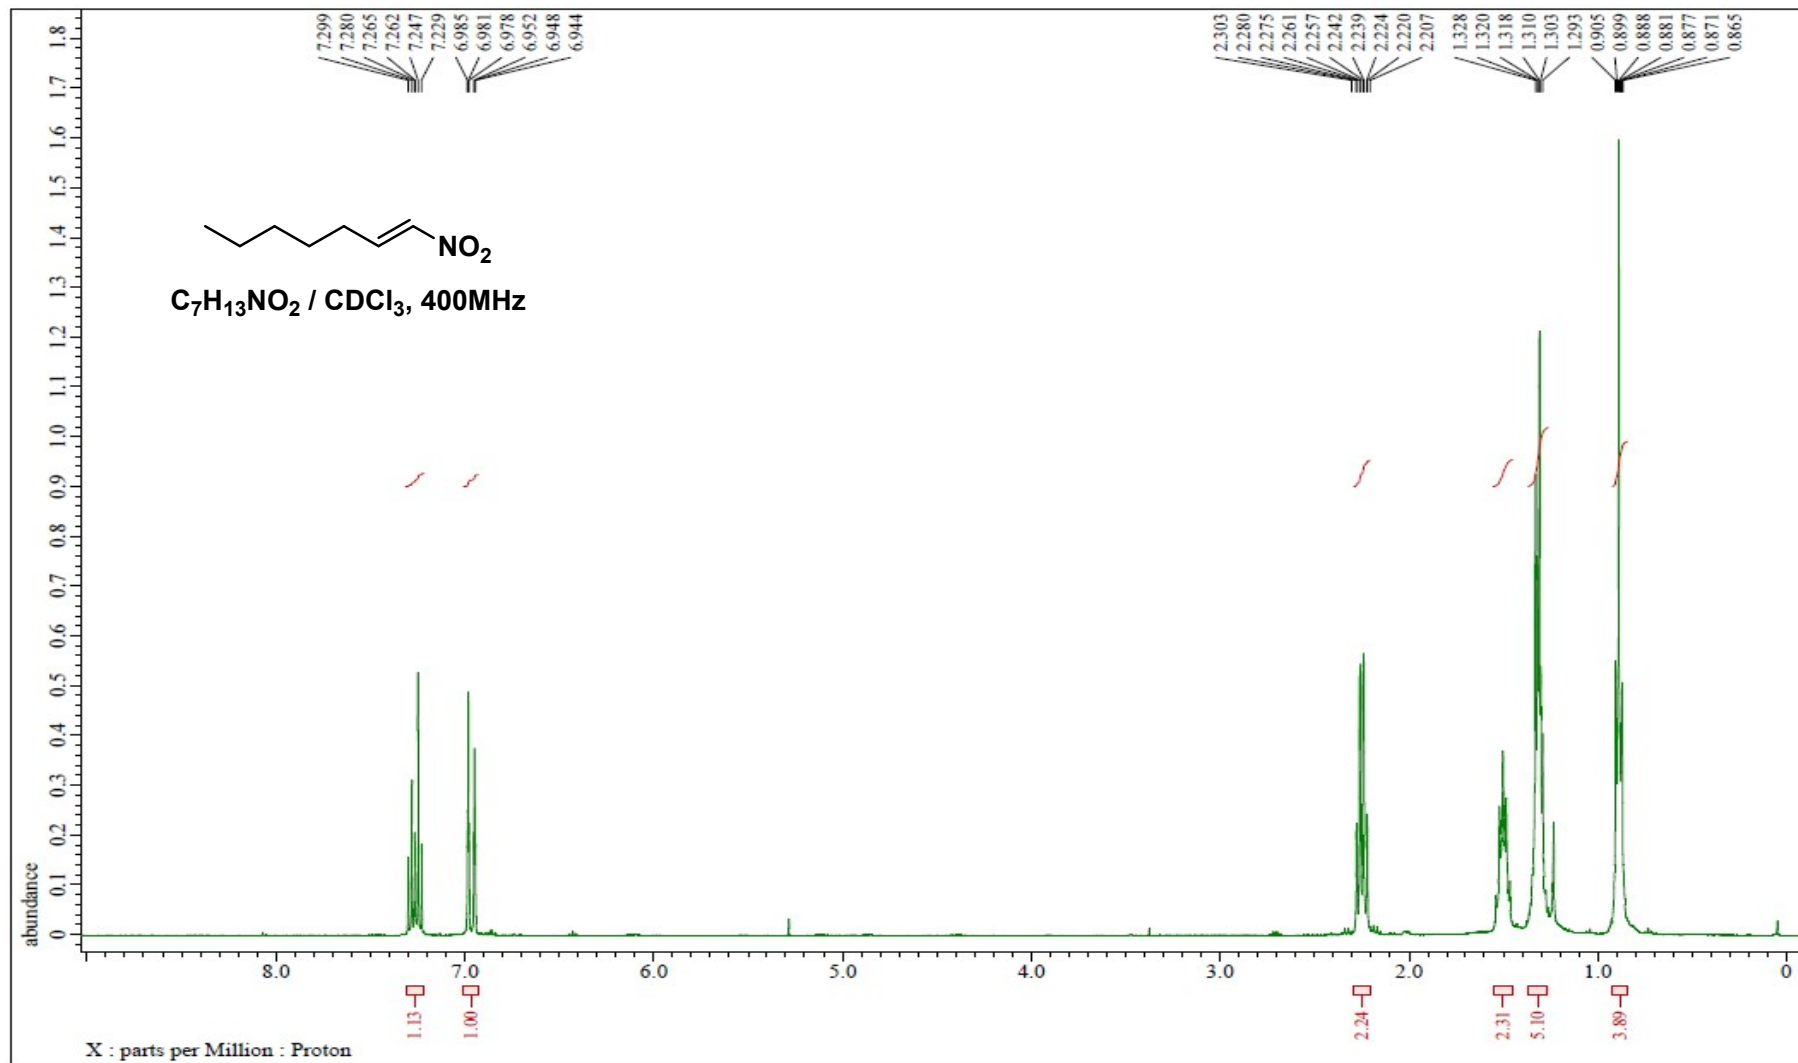

<sup>1</sup>H-NMR of compound (7c)

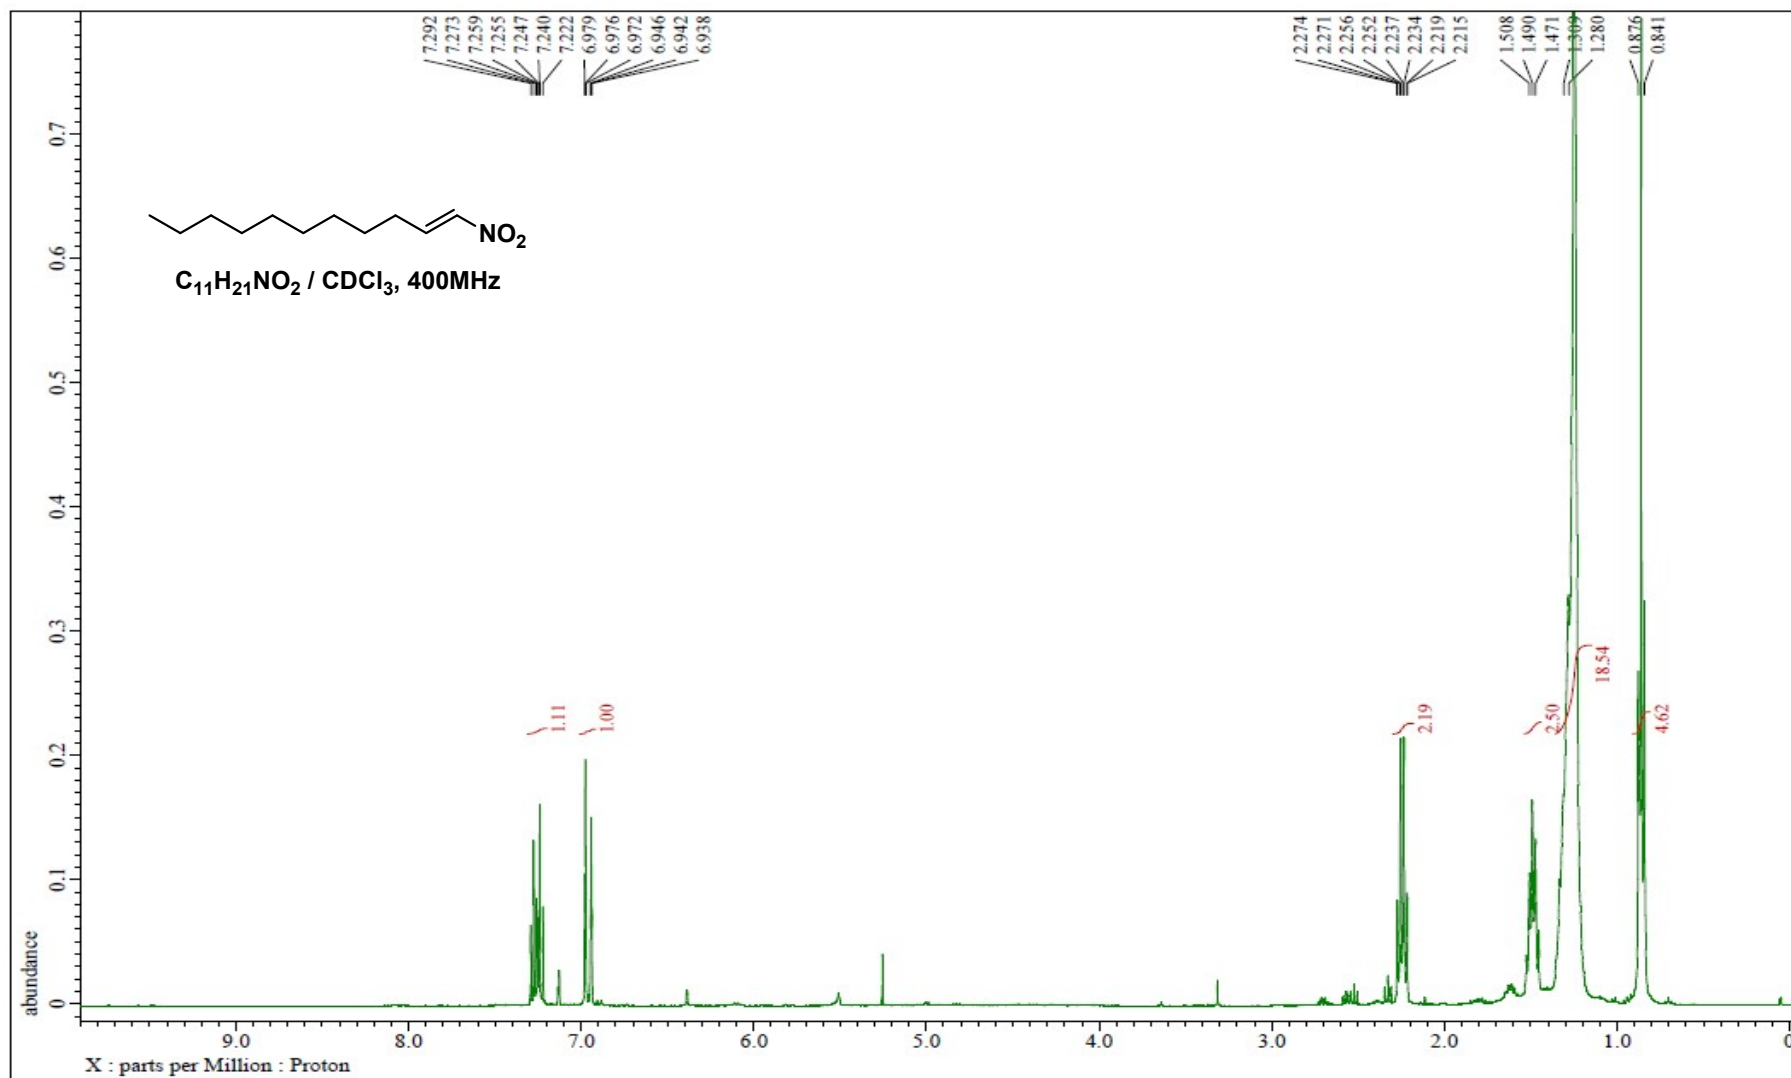

<sup>1</sup>H-NMR of compound (7d)

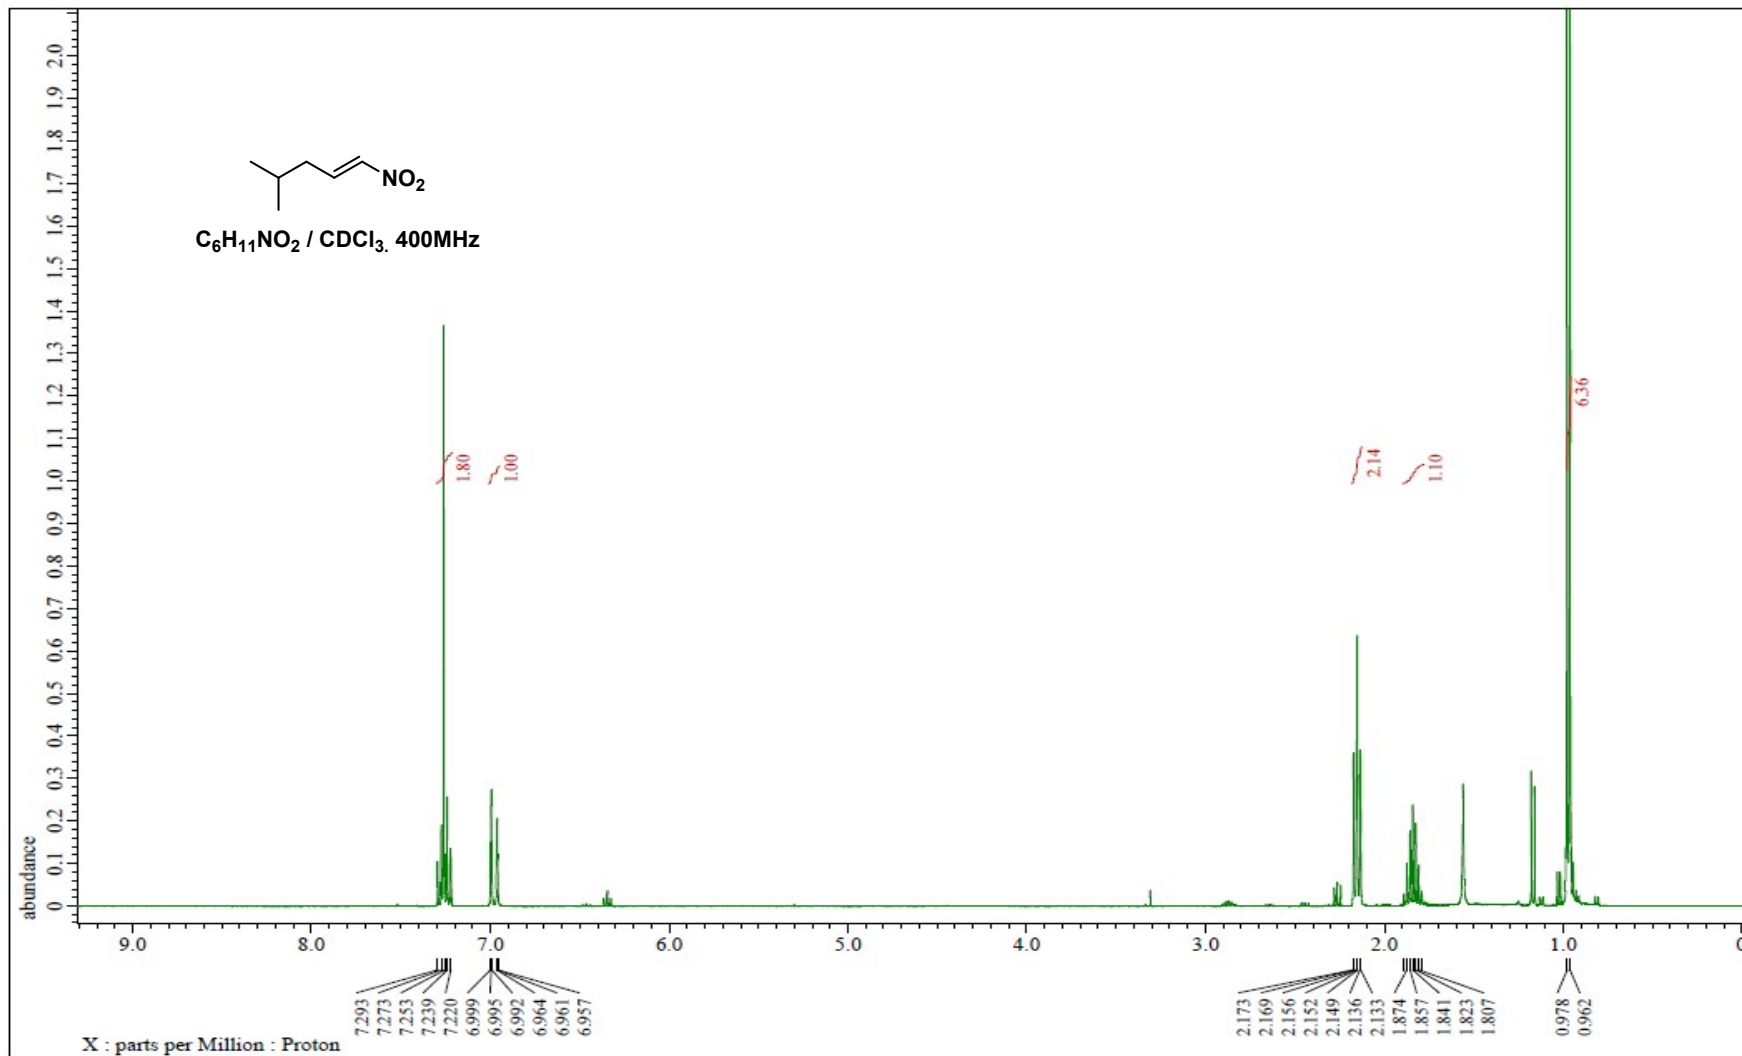

<sup>1</sup>H-NMR of compound (7e)

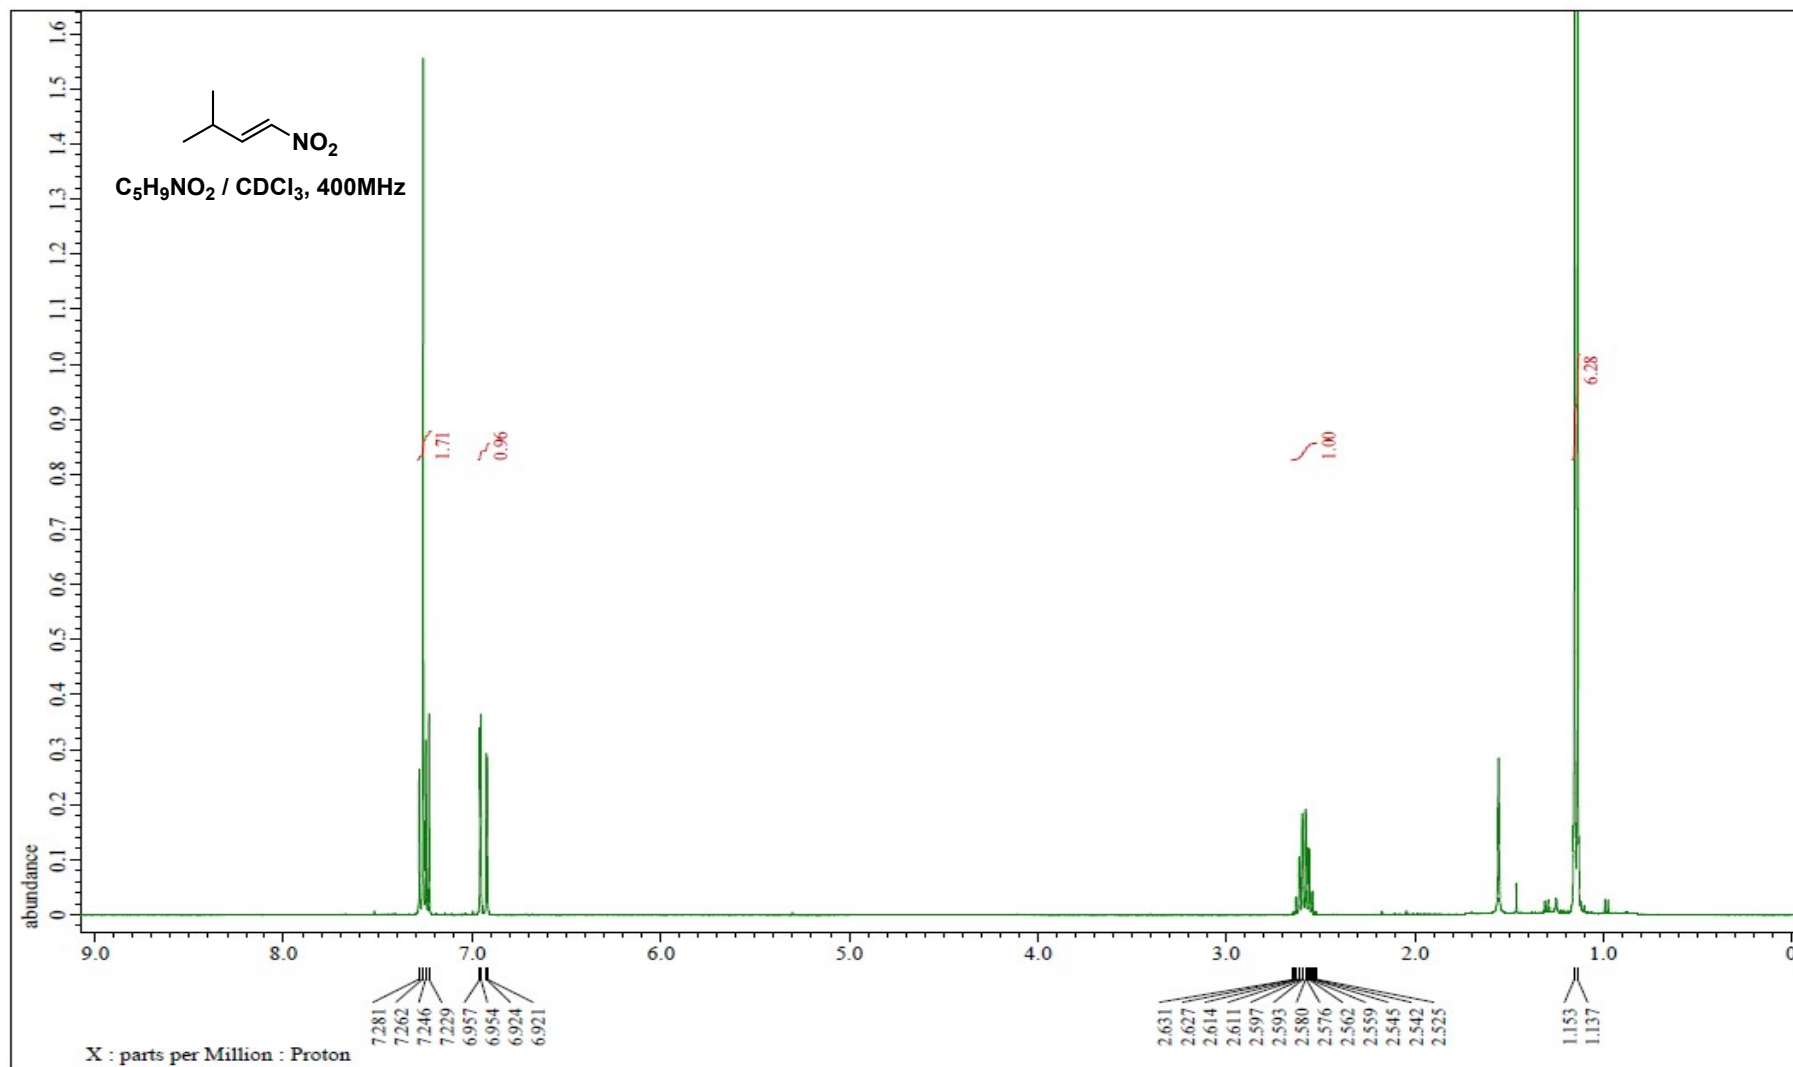

<sup>1</sup>H-NMR of compound (7f)

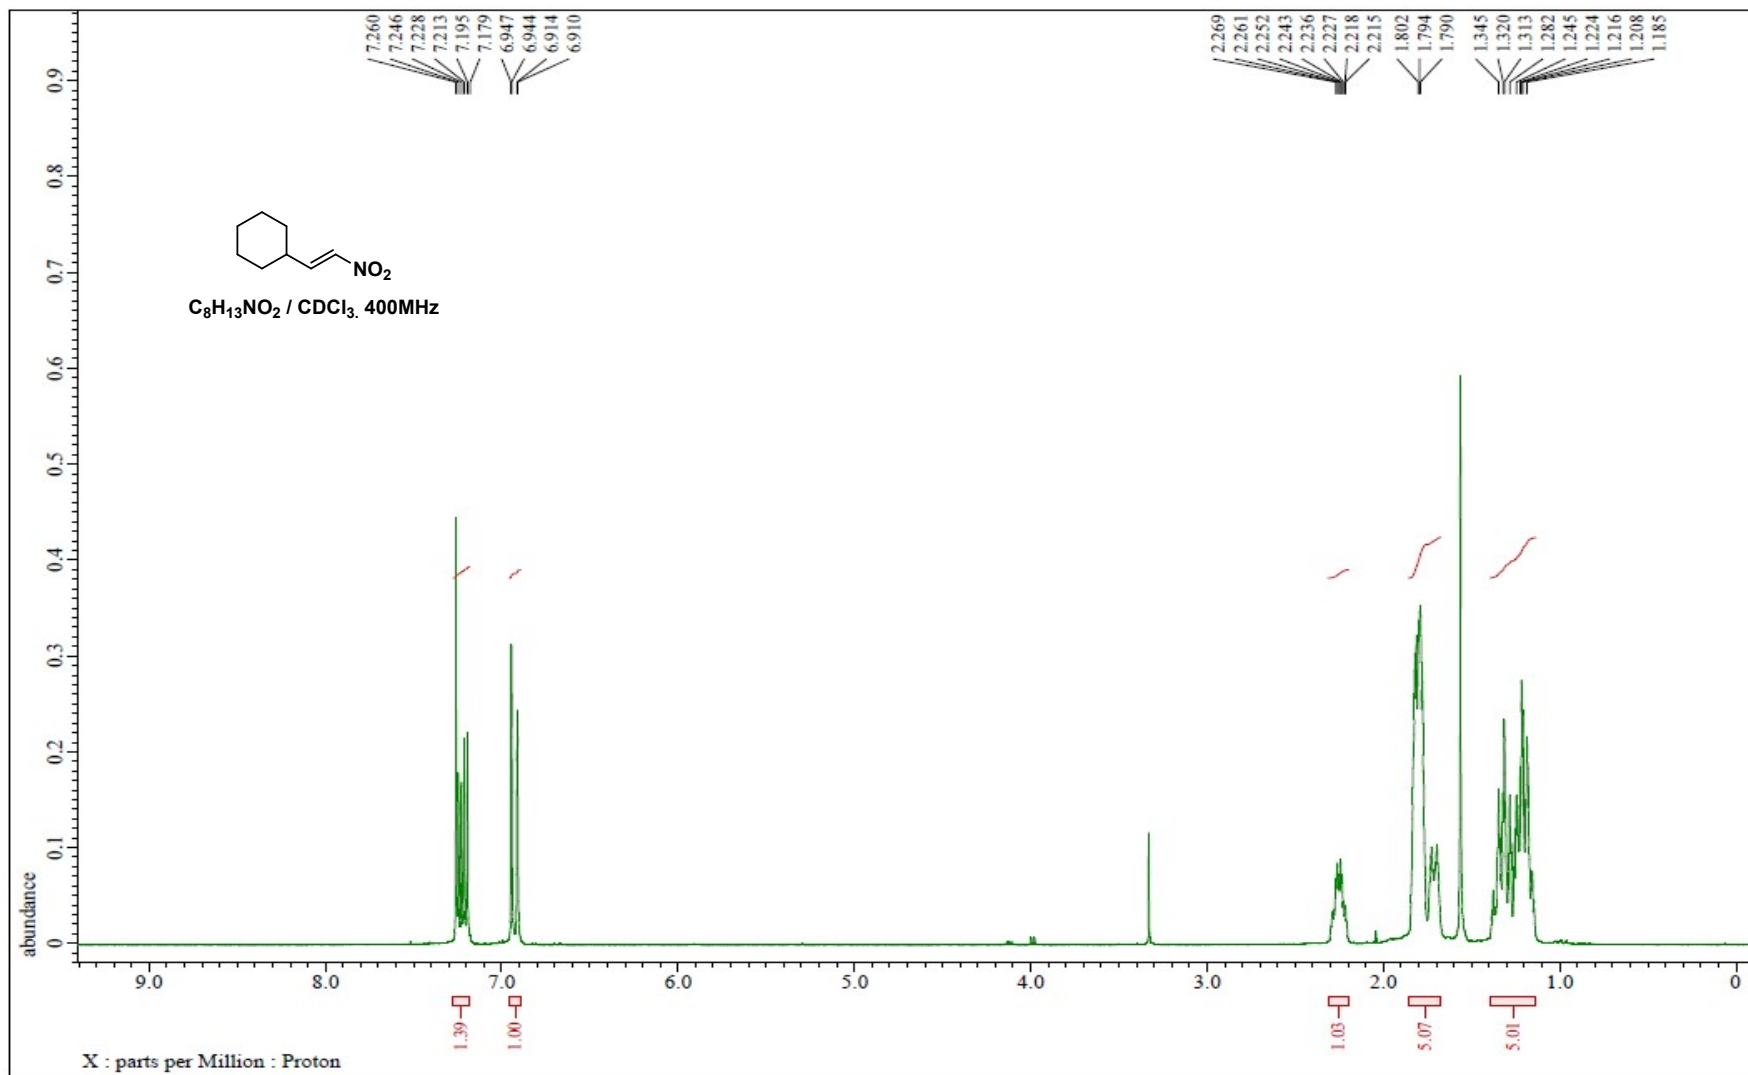

<sup>1</sup>H-NMR of compound (7j)

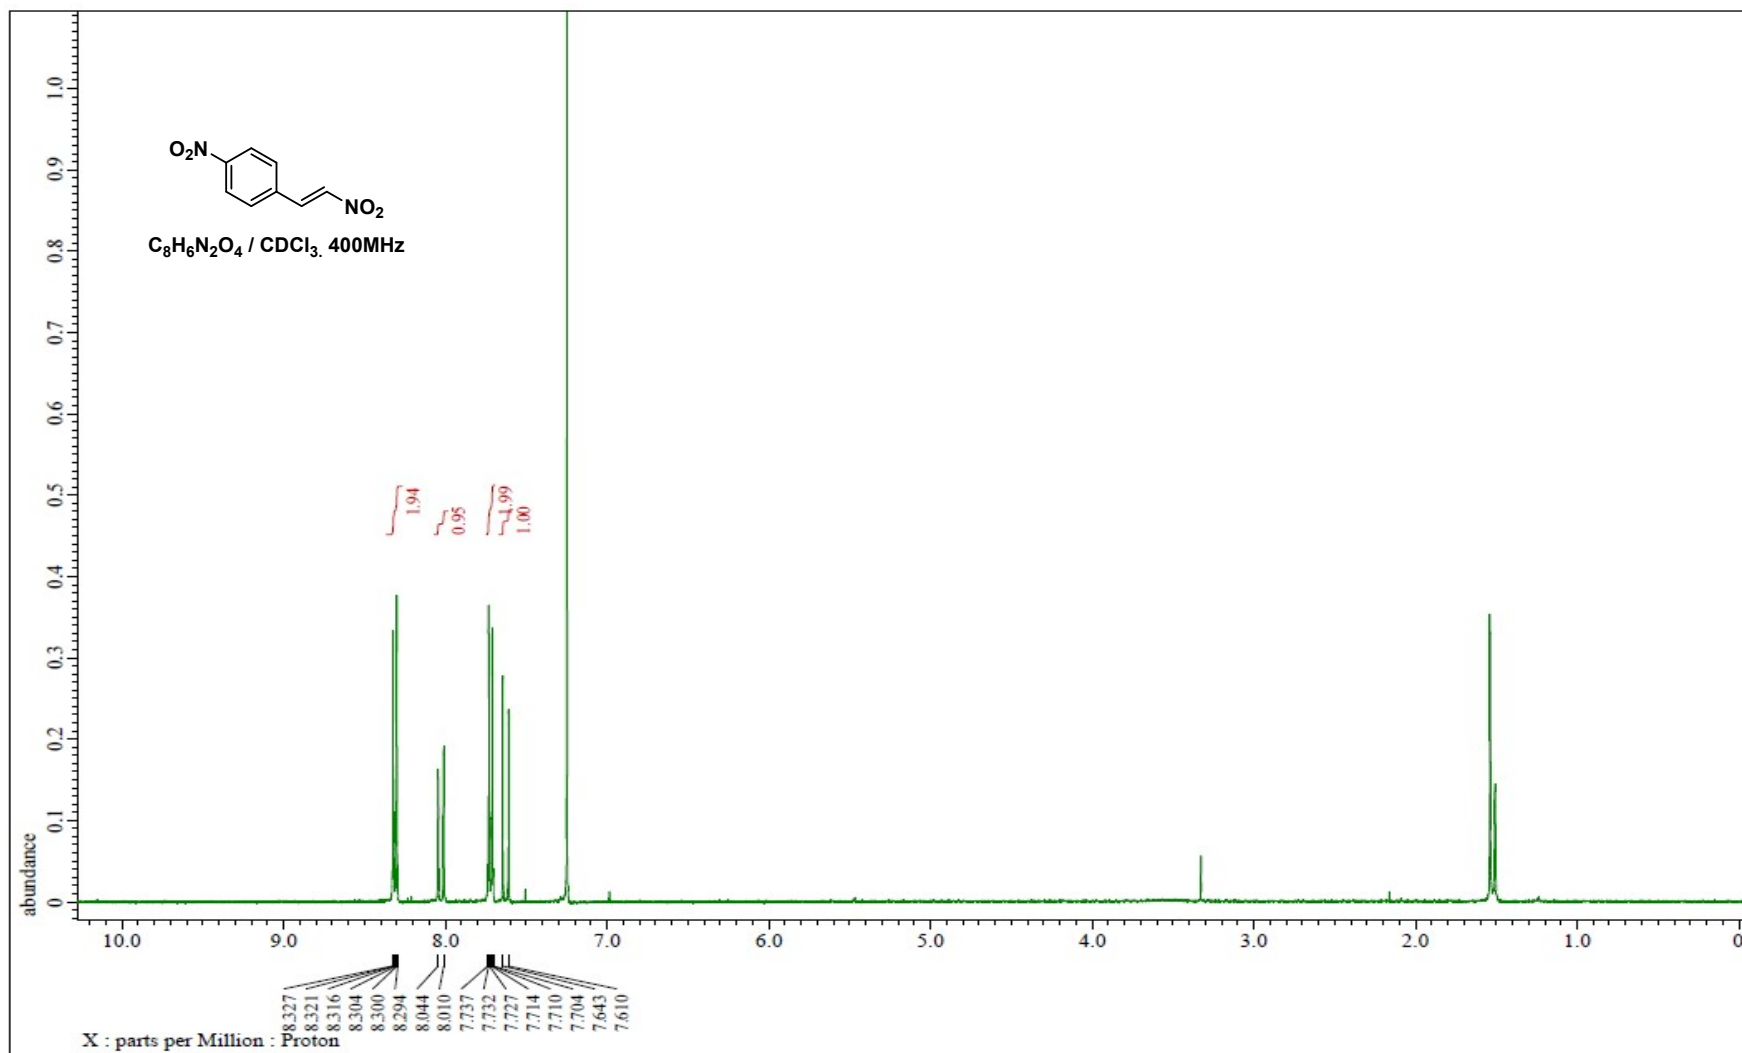

<sup>1</sup>H-NMR of compound (7k)

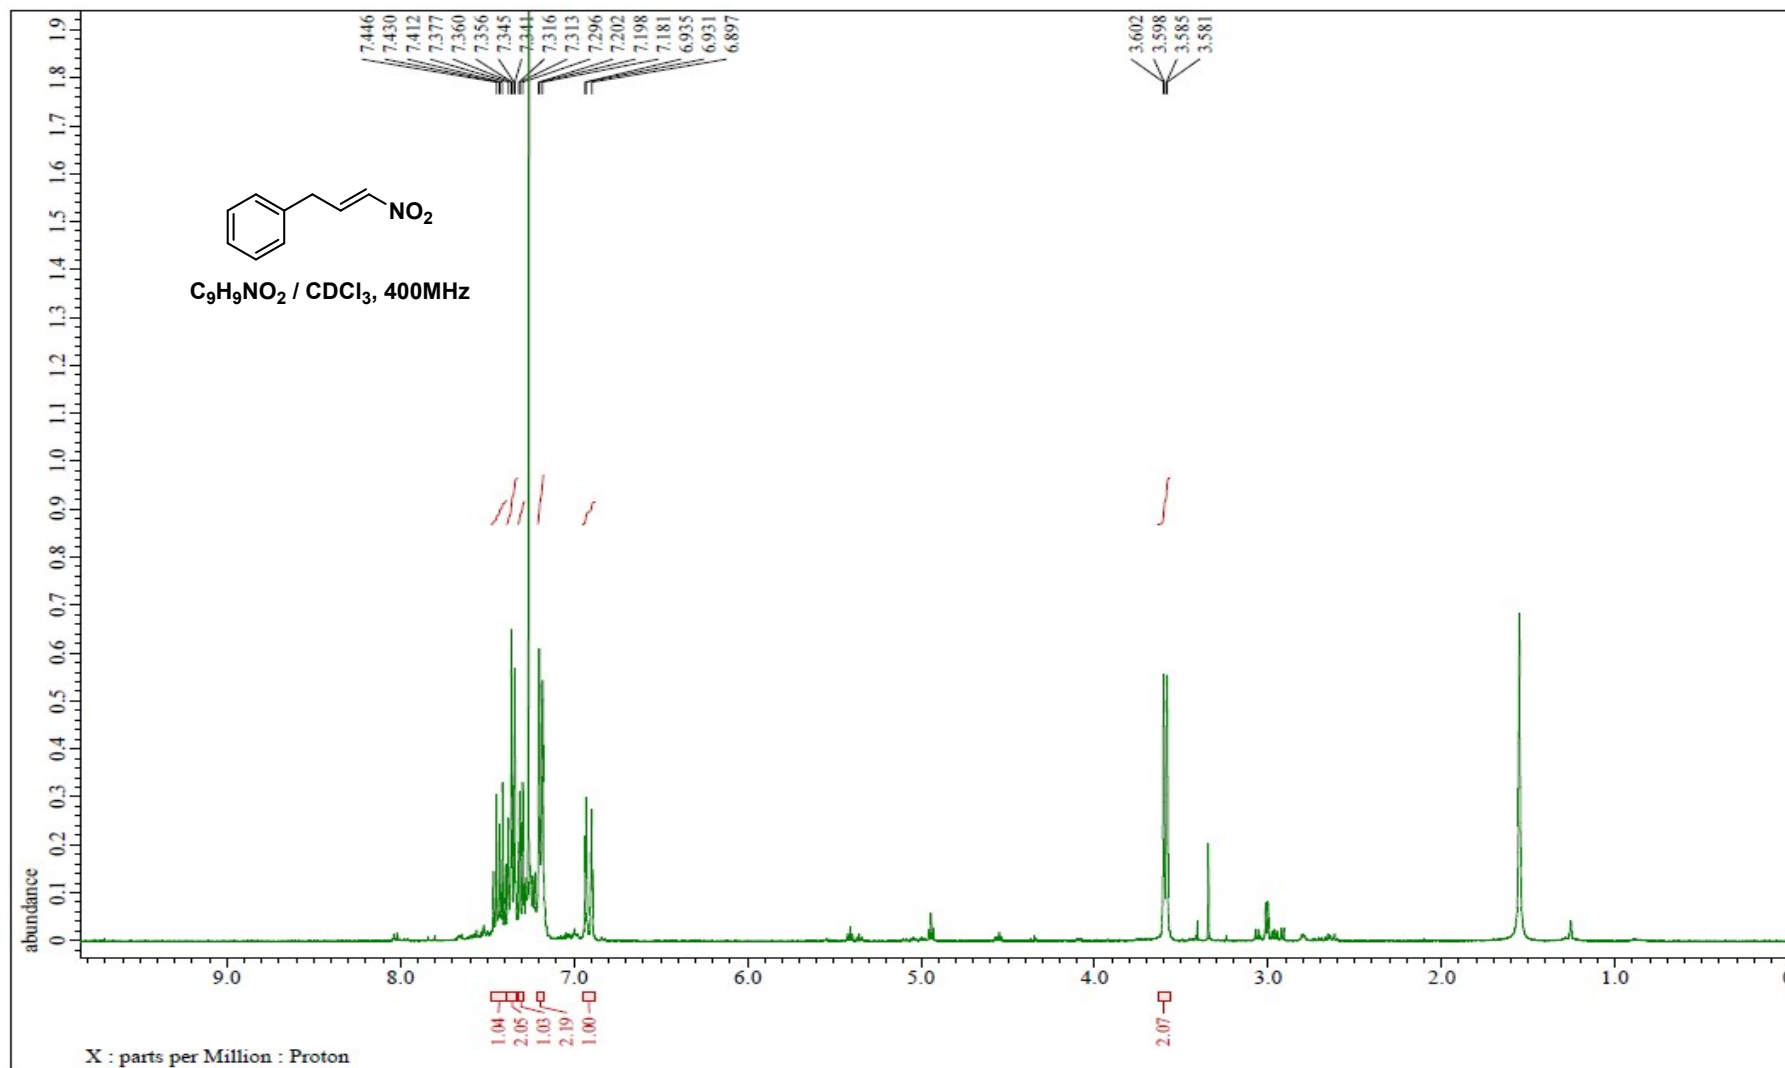

<sup>1</sup>H-NMR of compound (71)

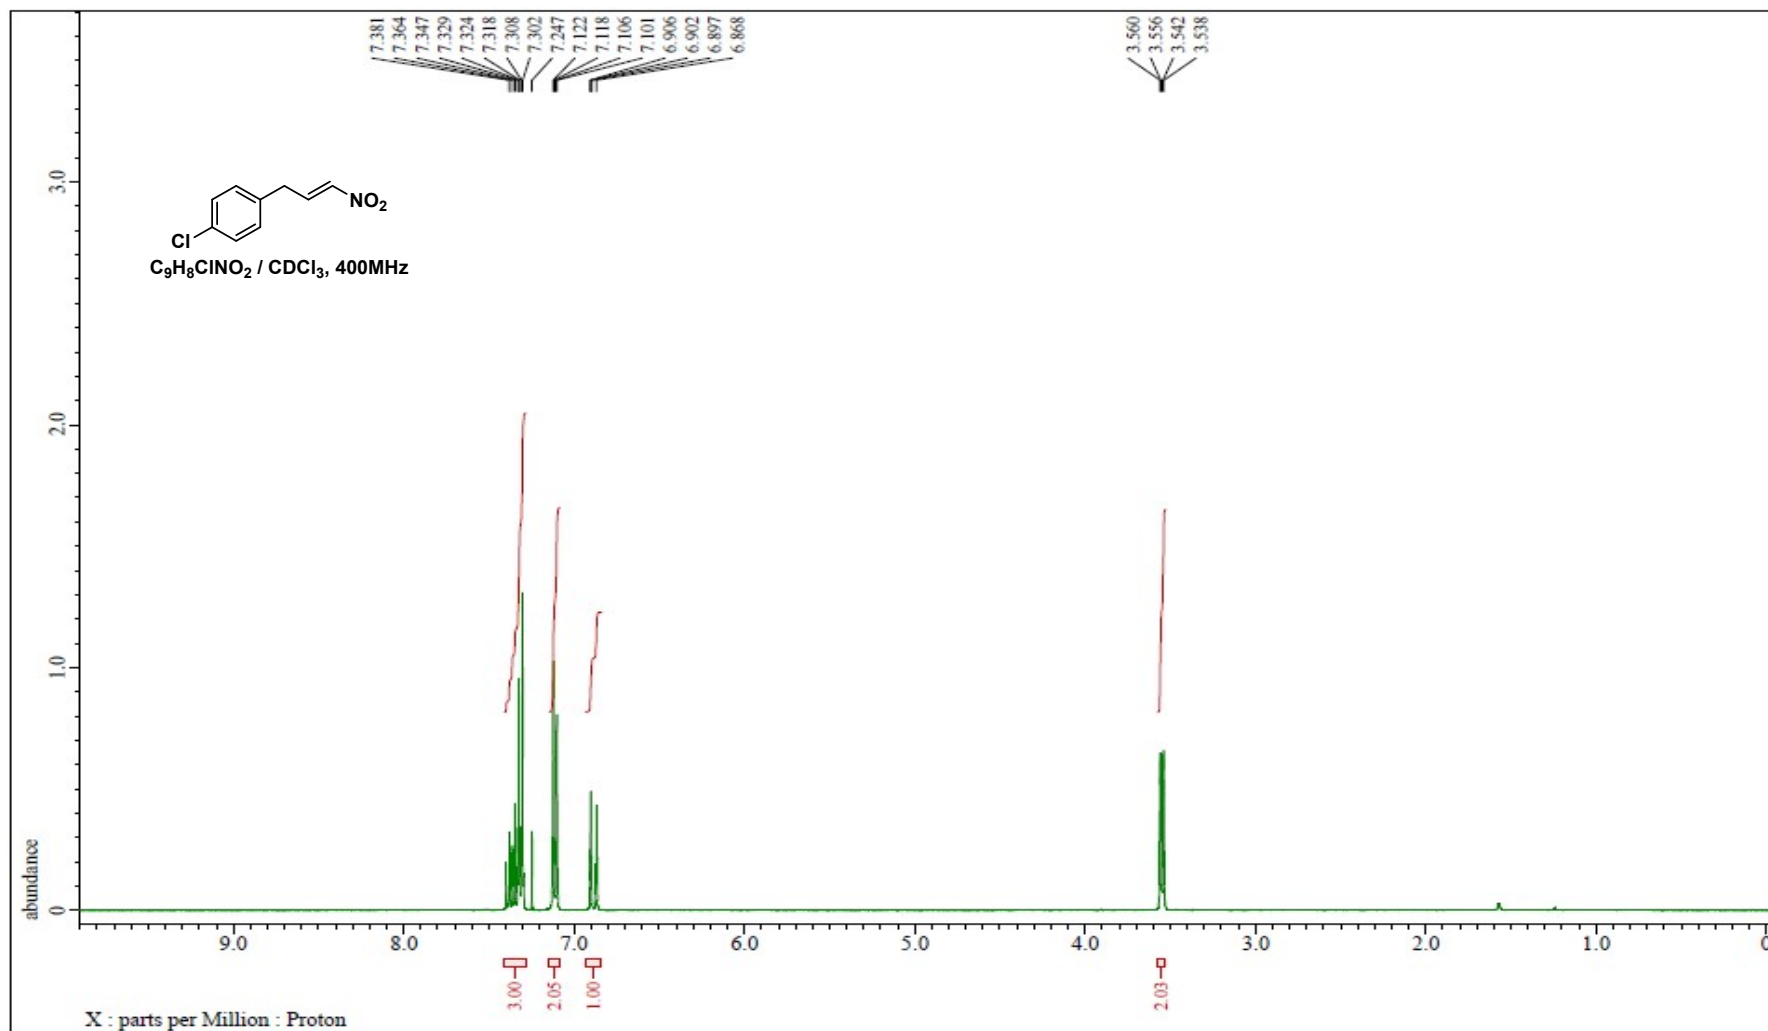



<sup>13</sup>C-NMR of compound (71)

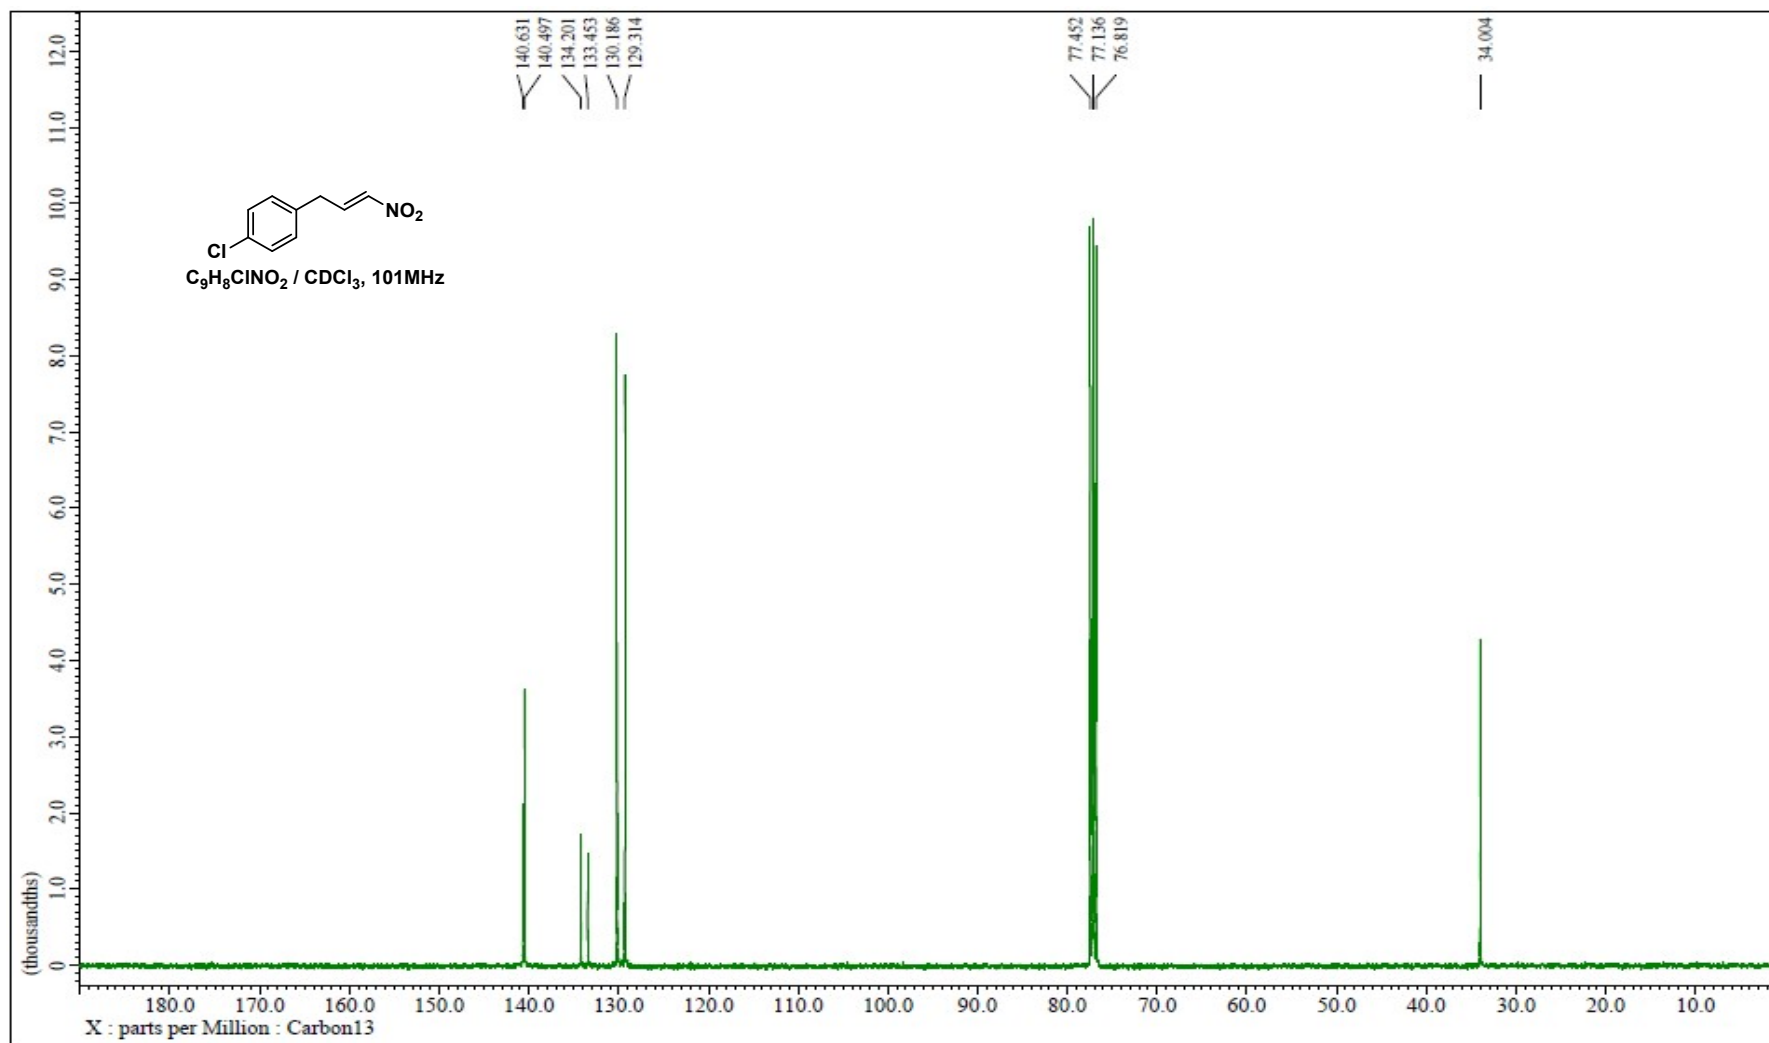

<sup>1</sup>H-NMR of compound (7m)

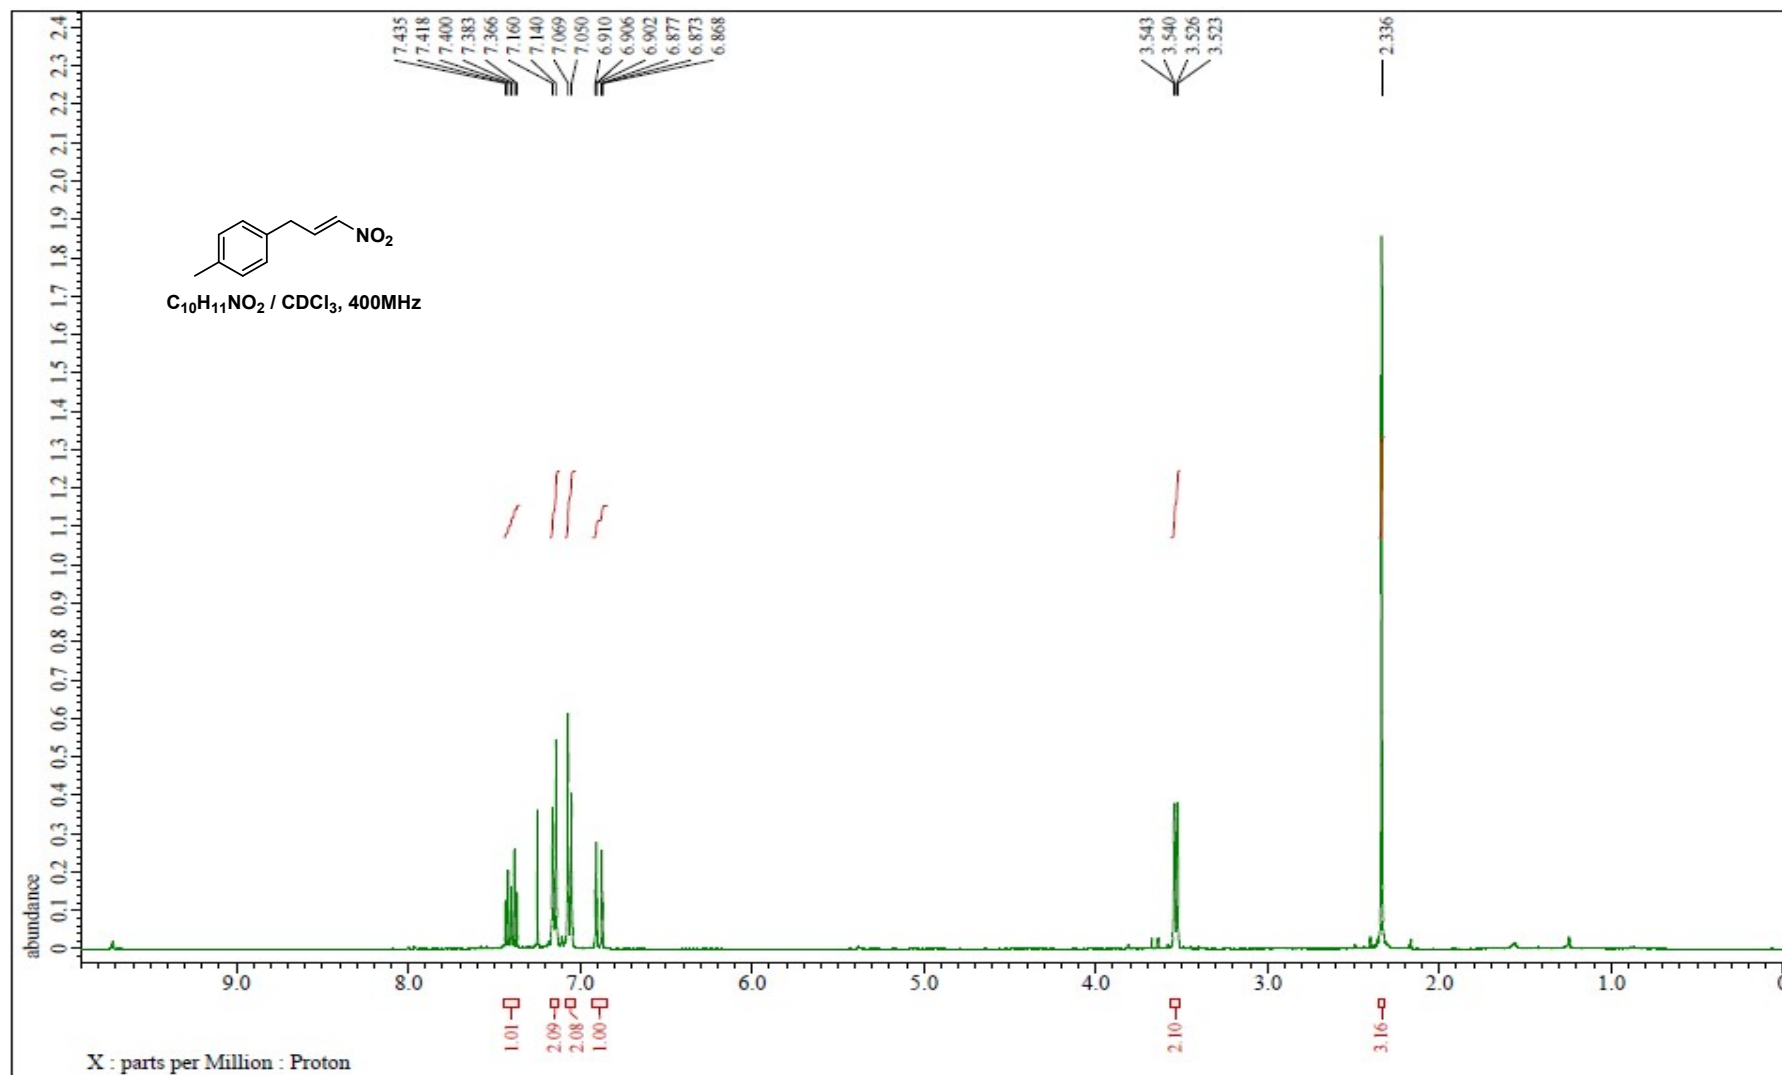

<sup>13</sup>C-NMR of compound (7m)

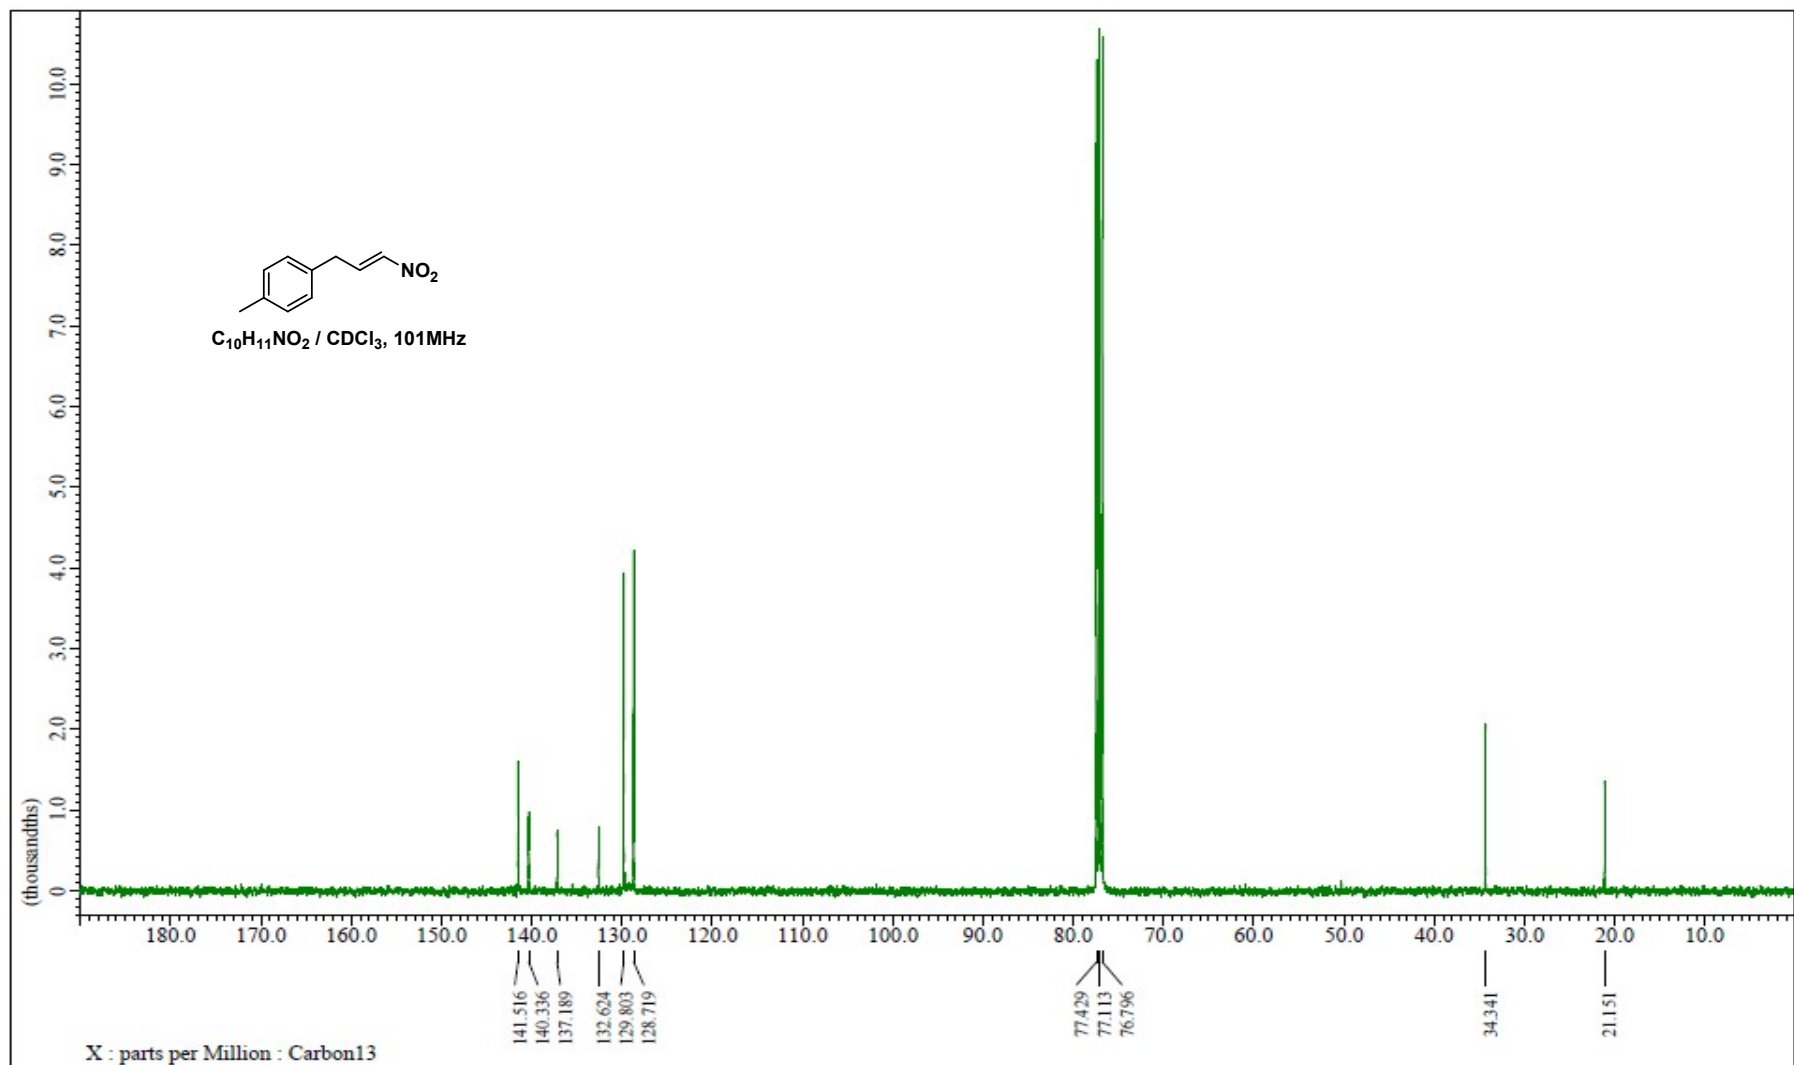

<sup>1</sup>H-NMR of compound (7n)

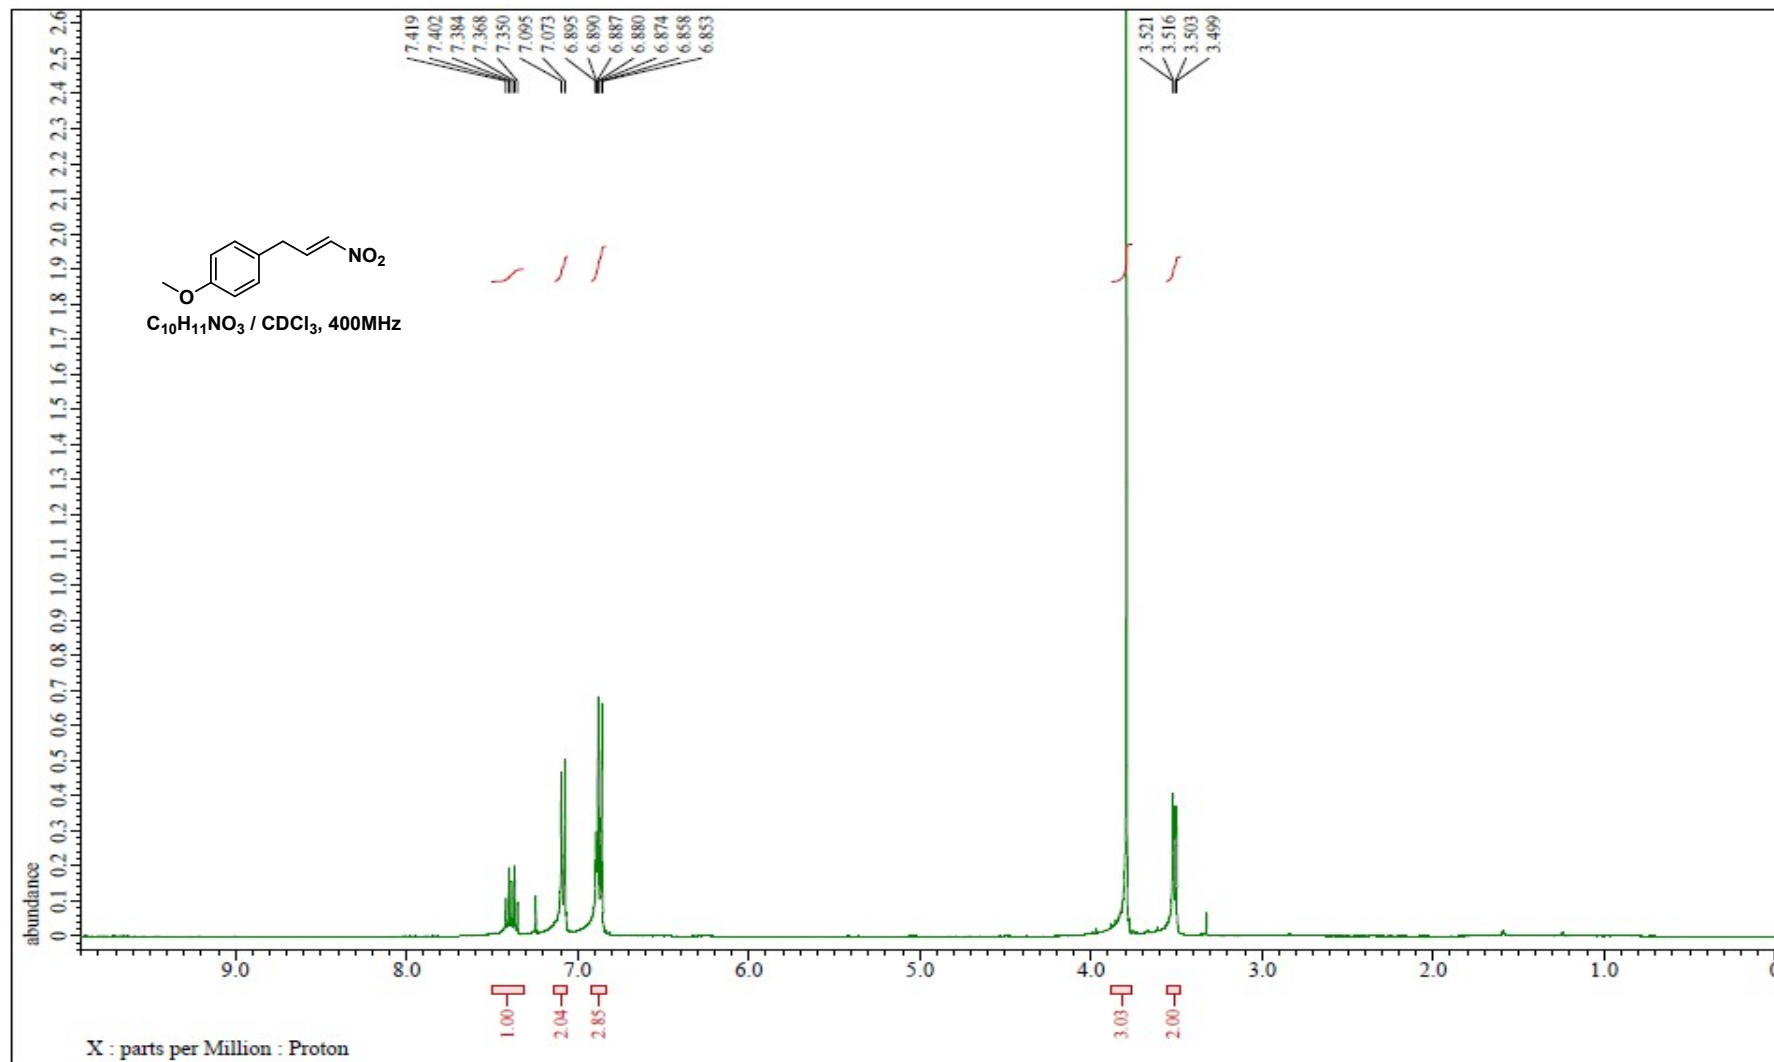

*<sup>13</sup>C -NMR of compound (7n)*

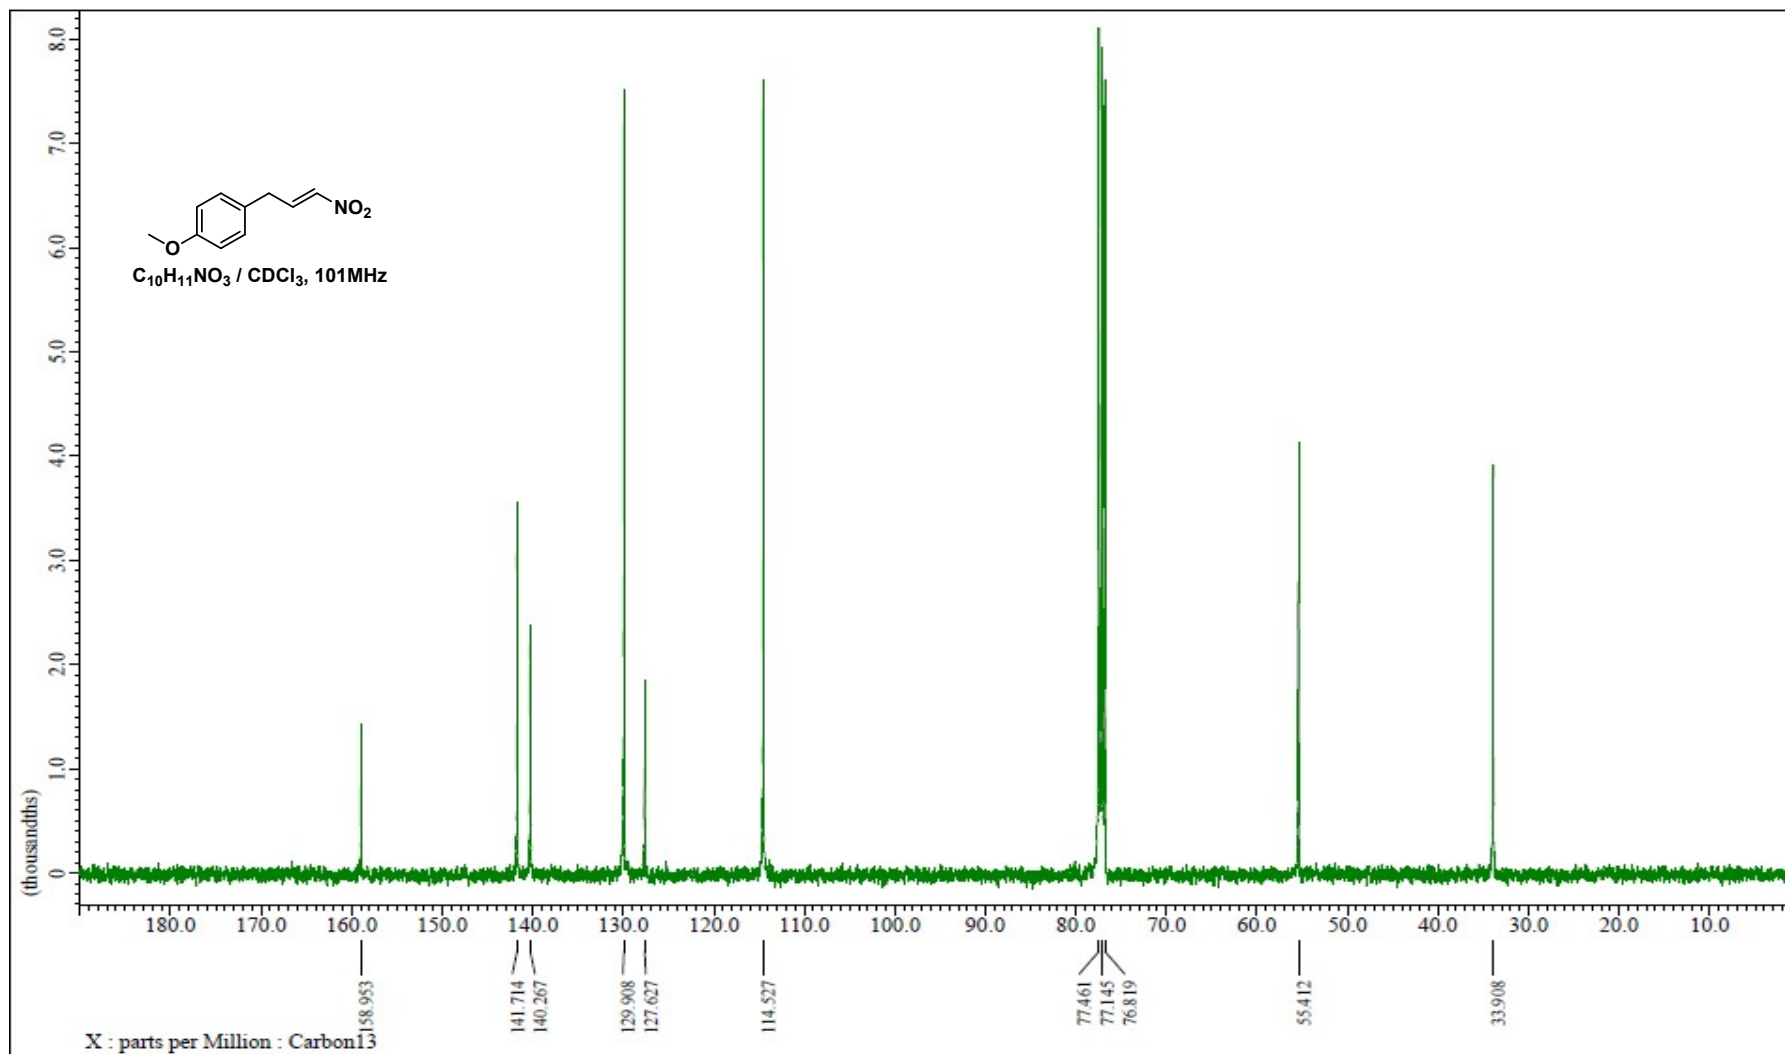

<sup>1</sup>H-NMR of compound (7o)

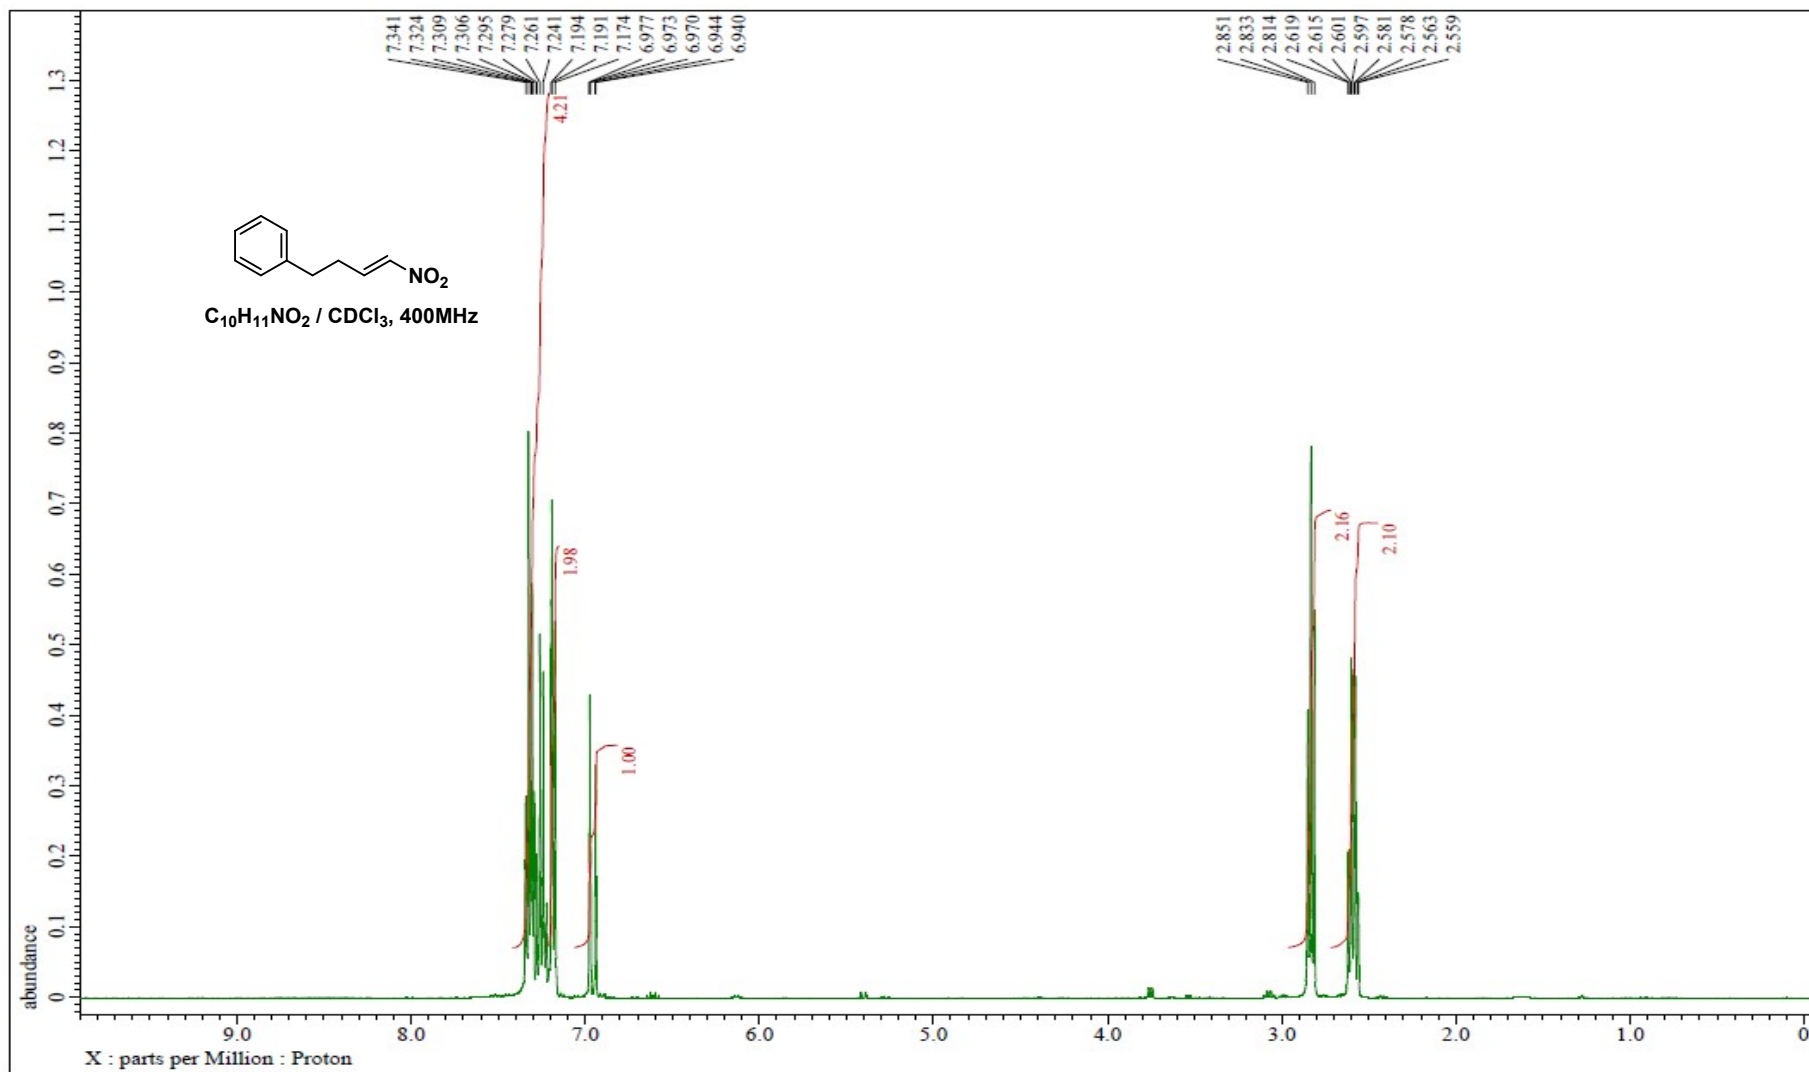

<sup>1</sup>H-NMR of compound (7p)

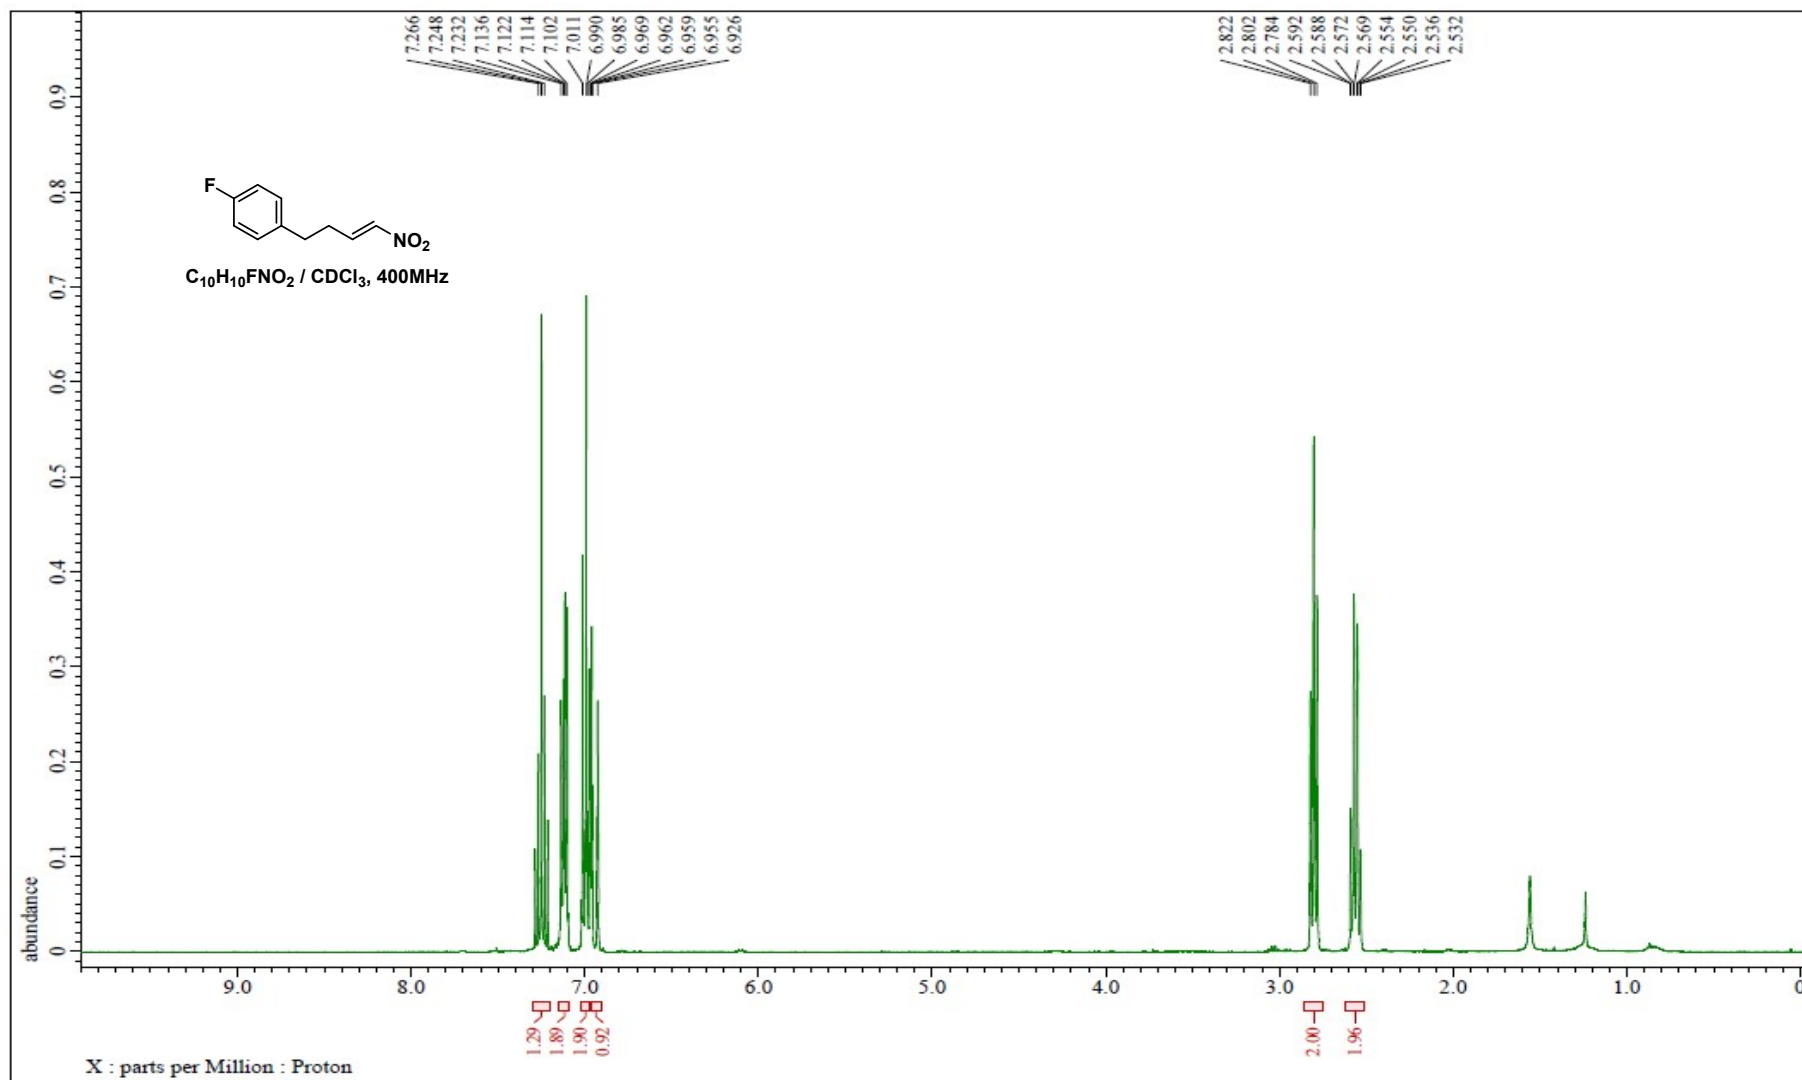



<sup>1</sup>H-NMR of compound (7q)

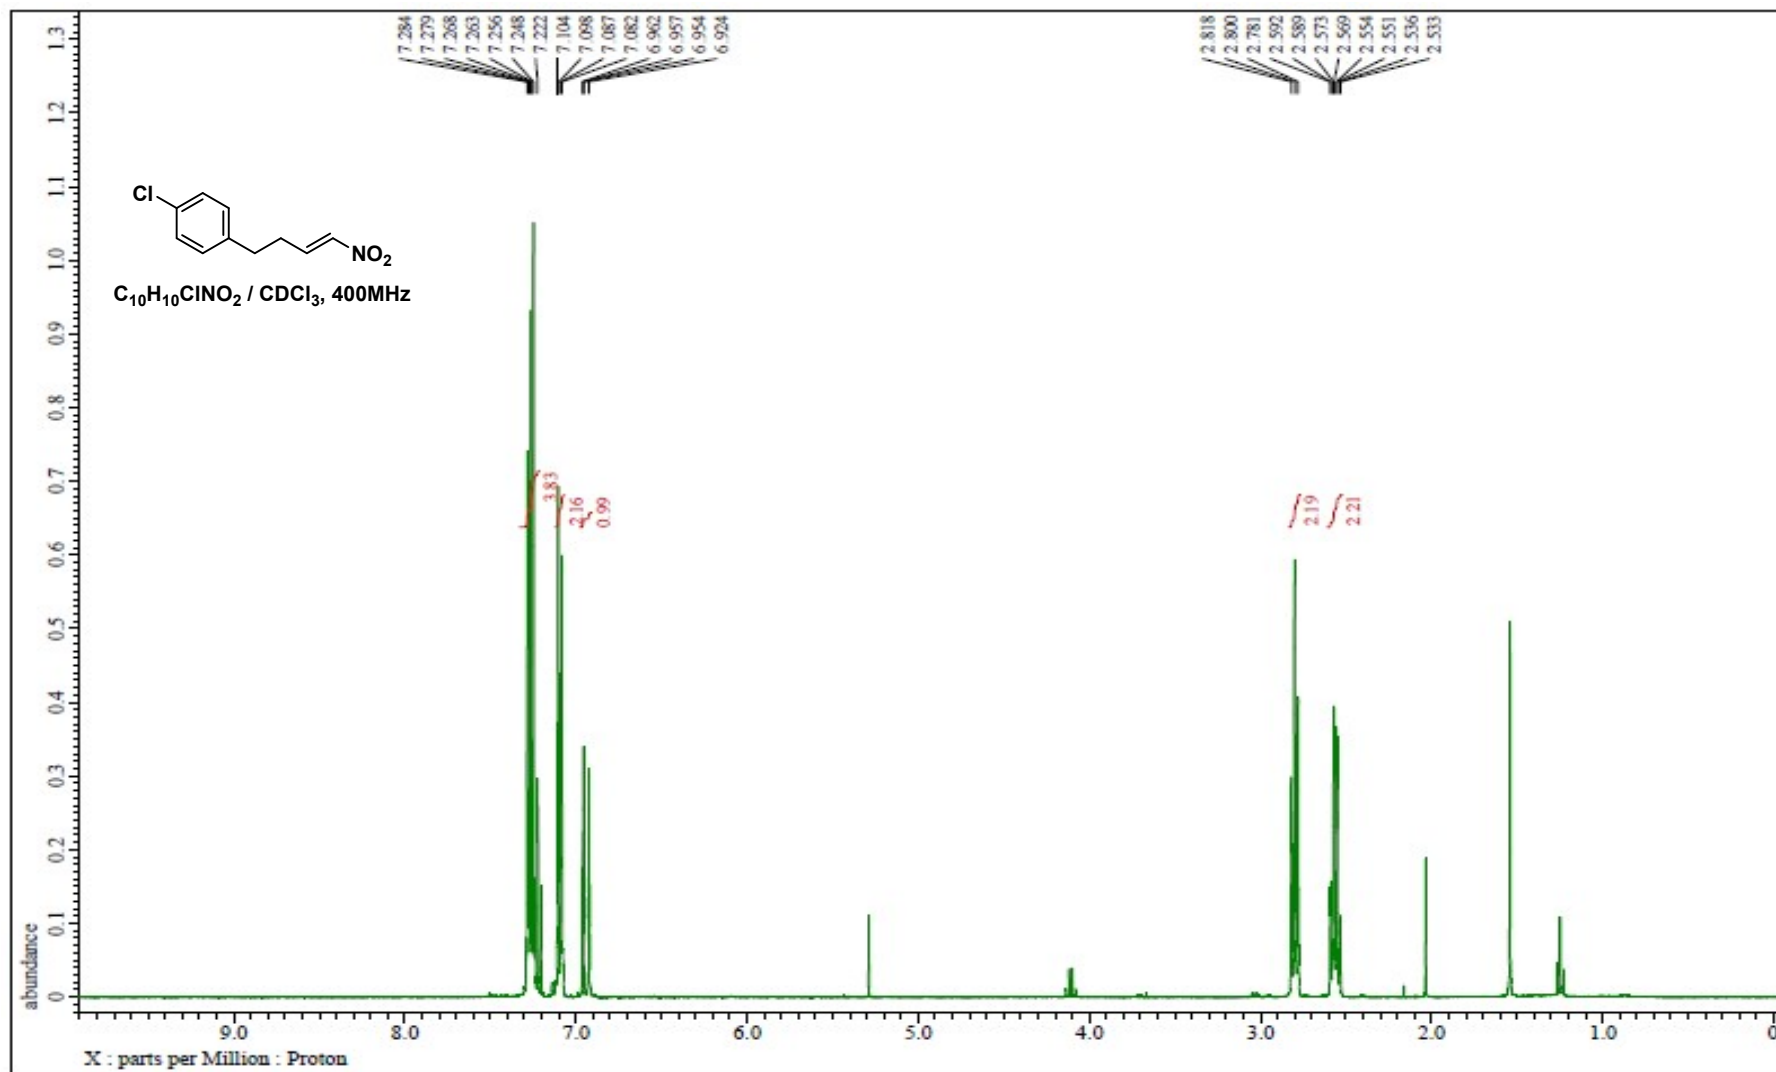

<sup>13</sup>C-NMR of compound (7q)

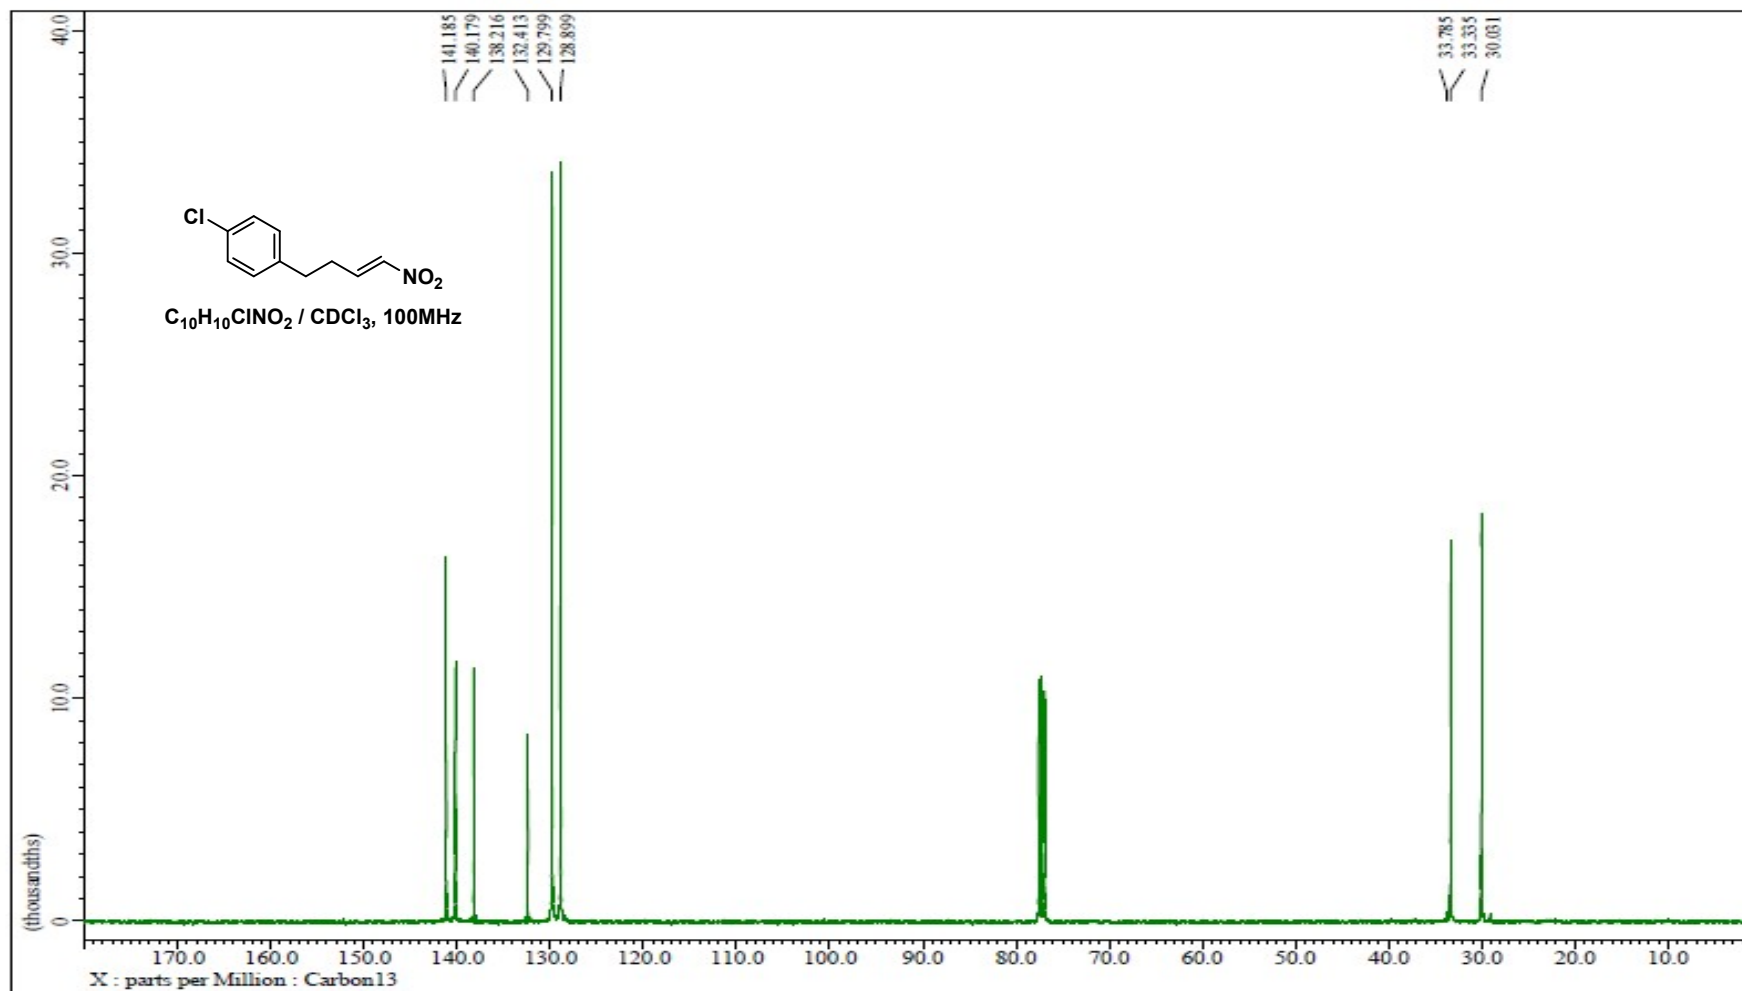

<sup>1</sup>H-NMR of compound (7r)

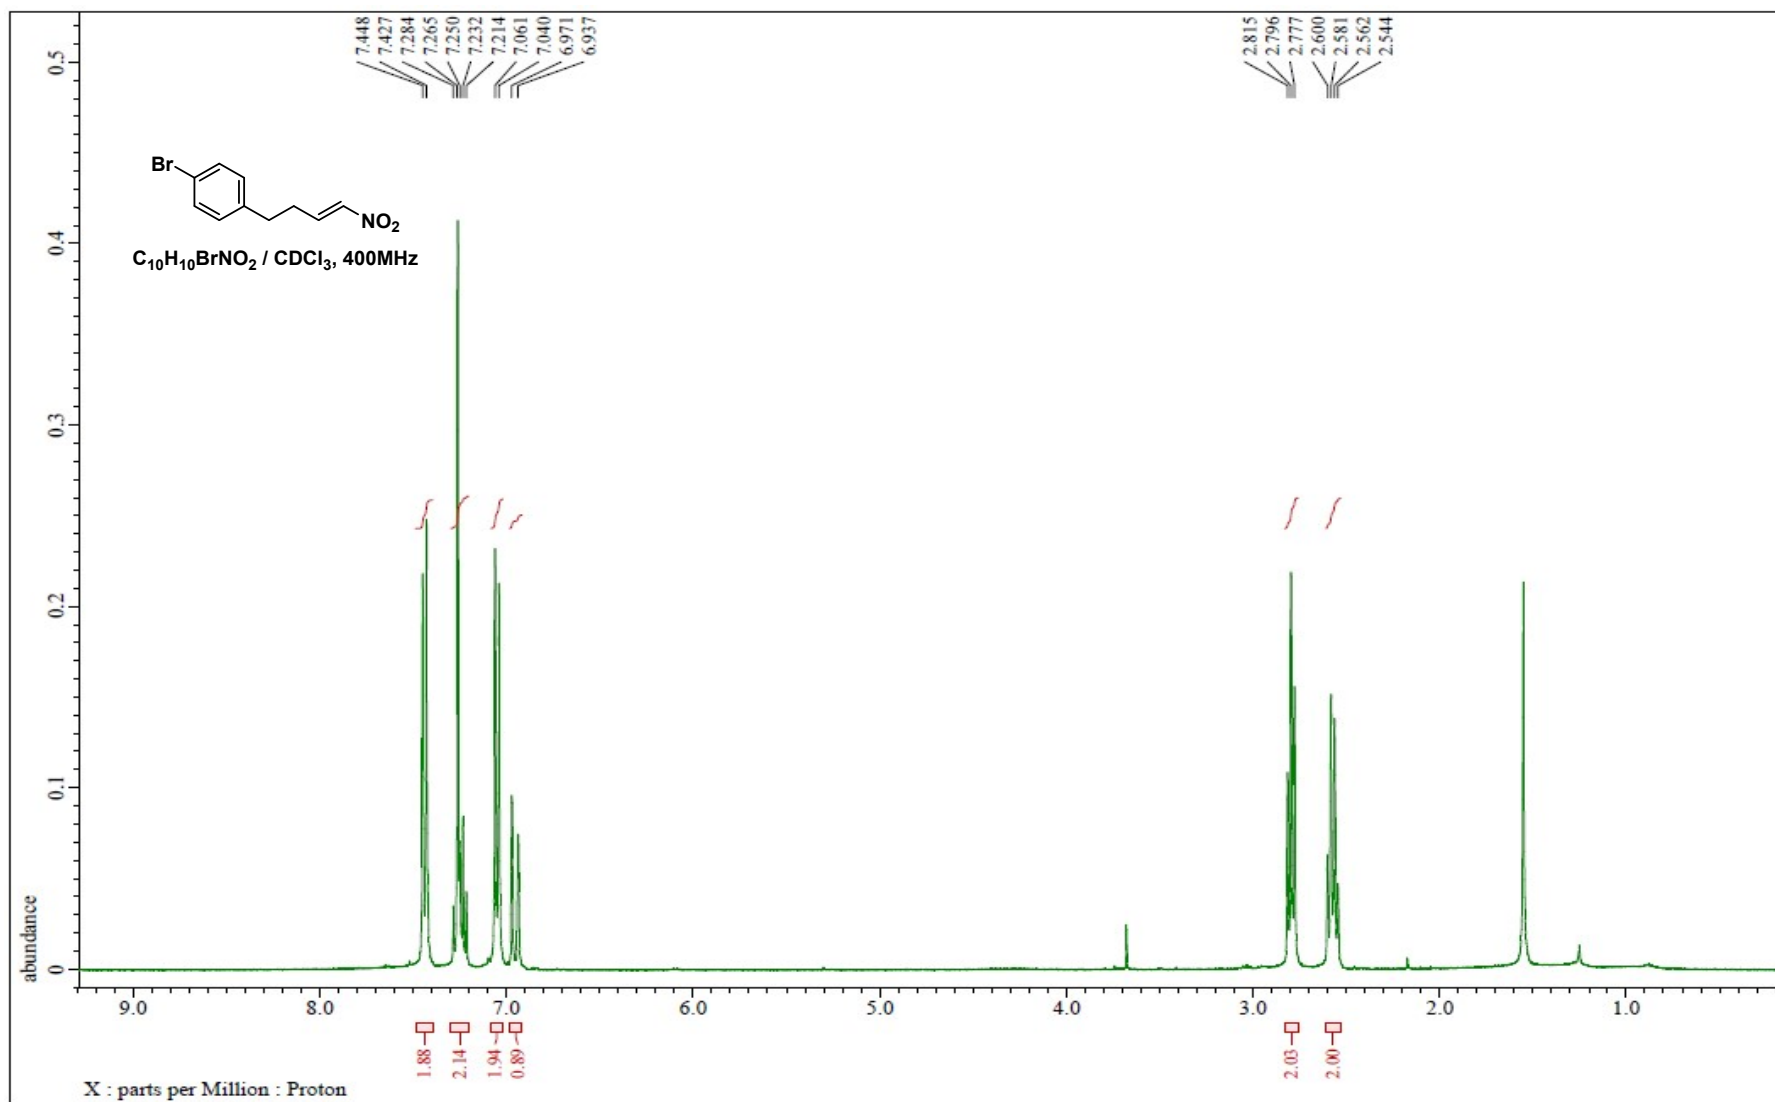

<sup>1</sup>H-NMR of compound (7s)

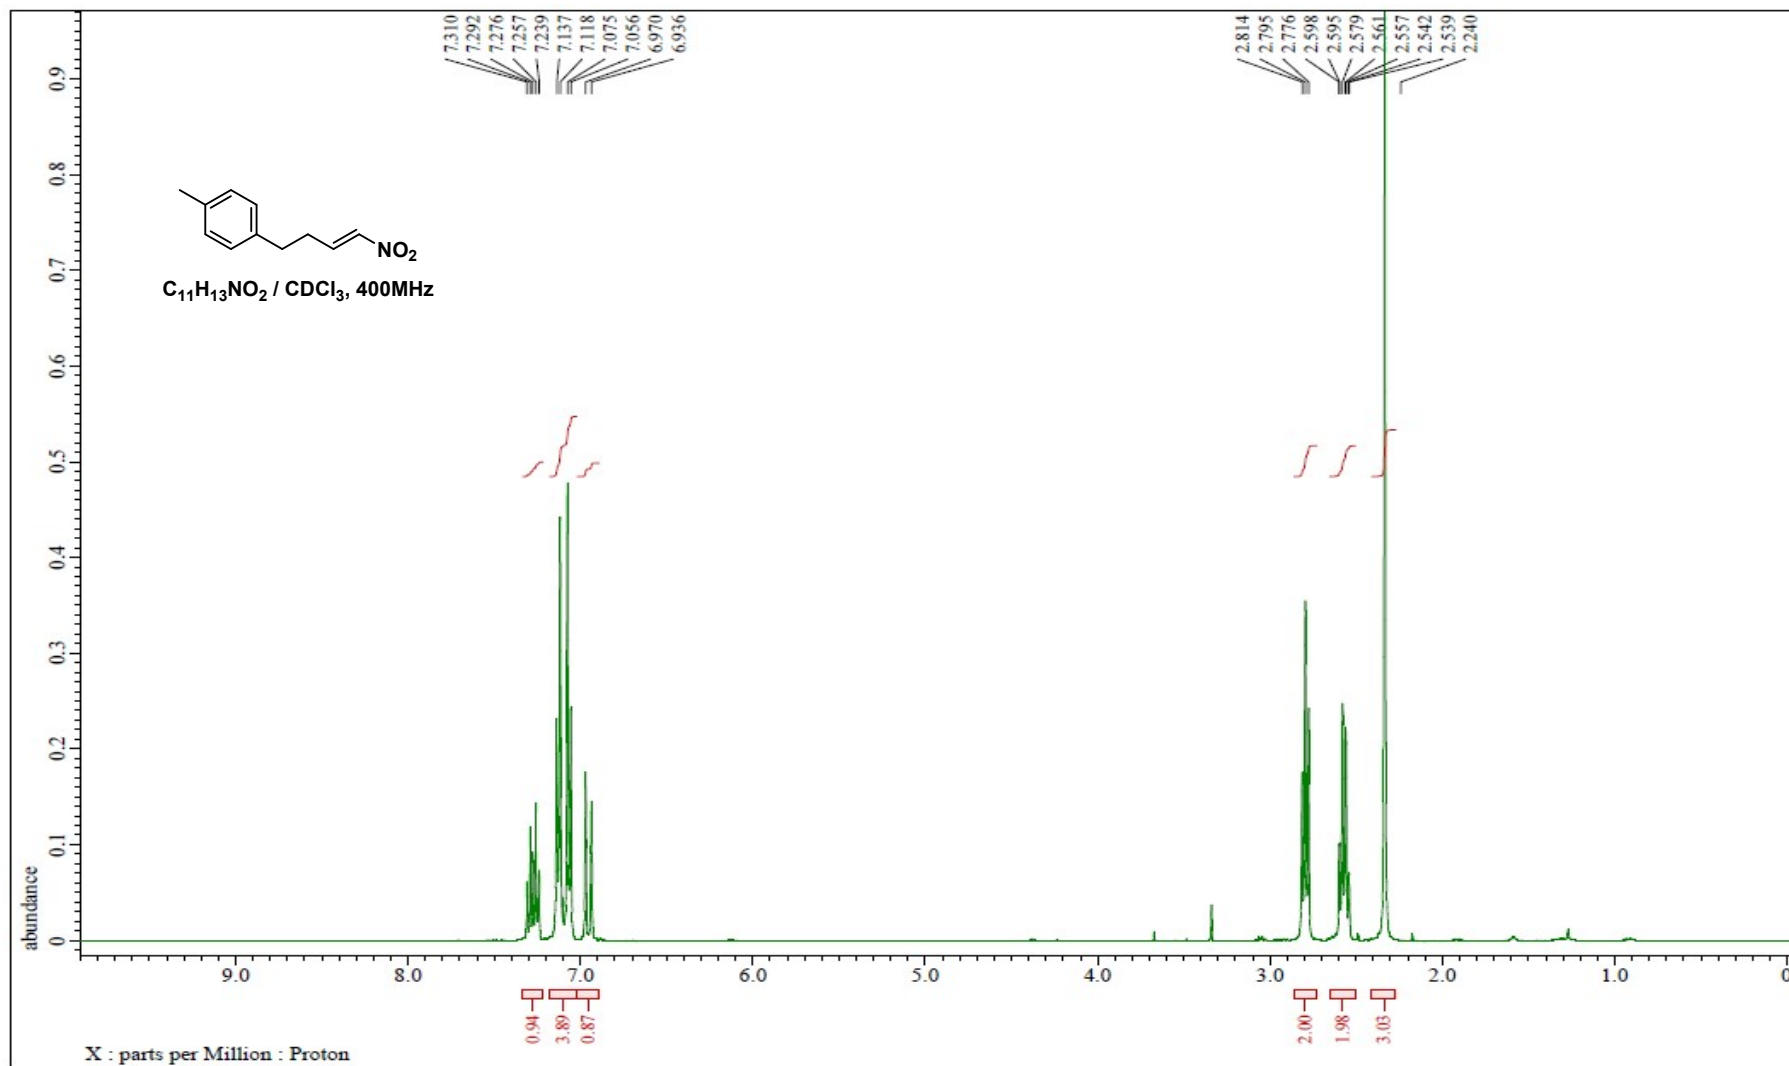

$^{13}\text{C}$ -NMR of compound (7s)

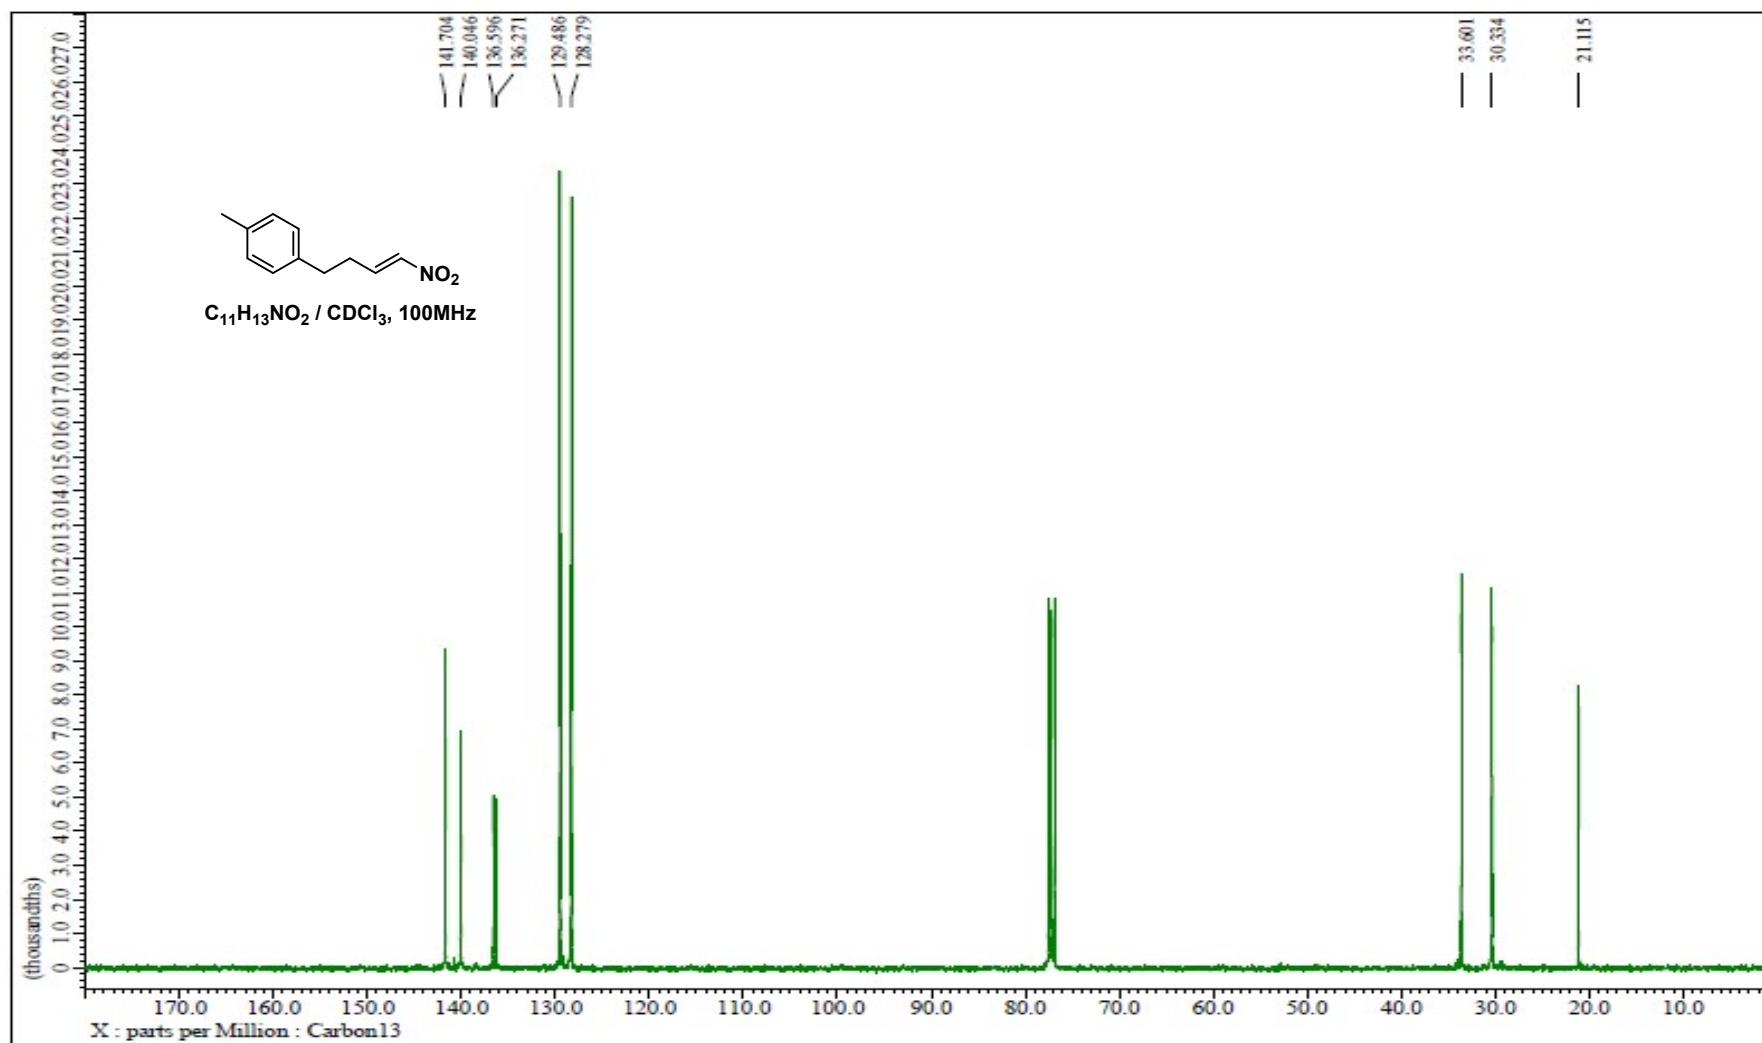

<sup>1</sup>H-NMR of compound (7t)

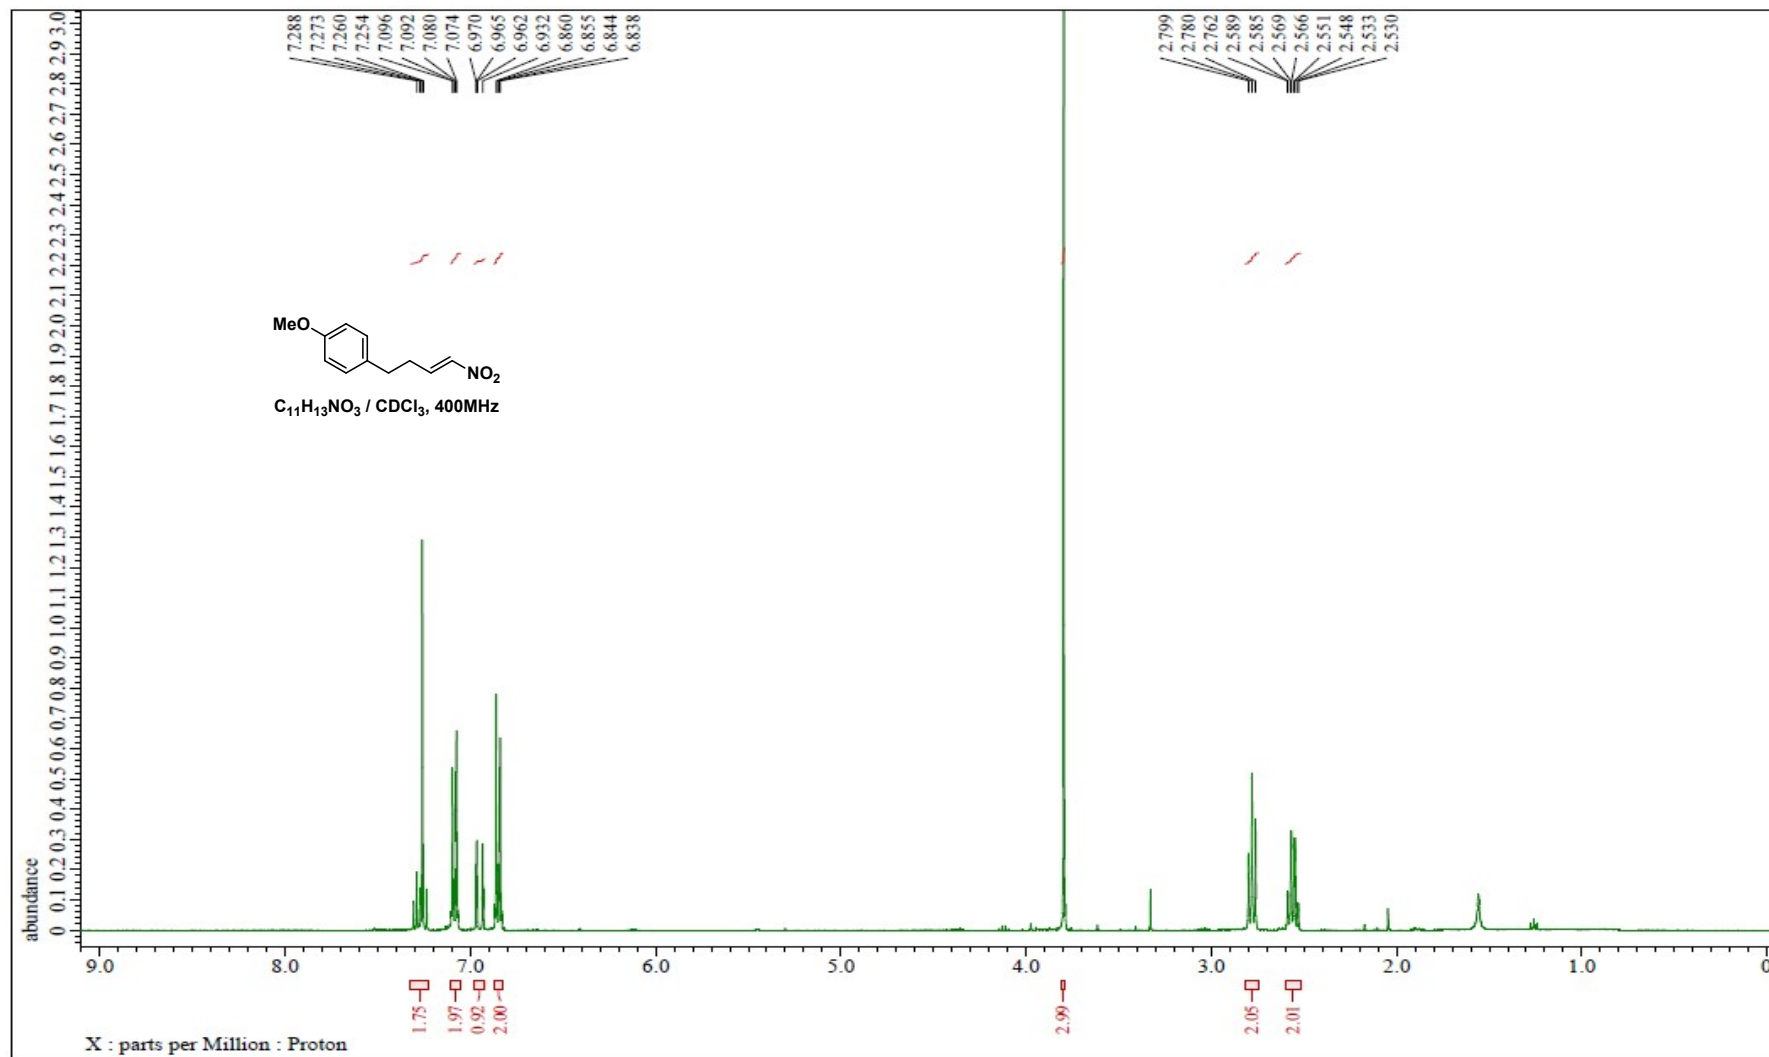

<sup>1</sup>H-NMR of compound (8a)

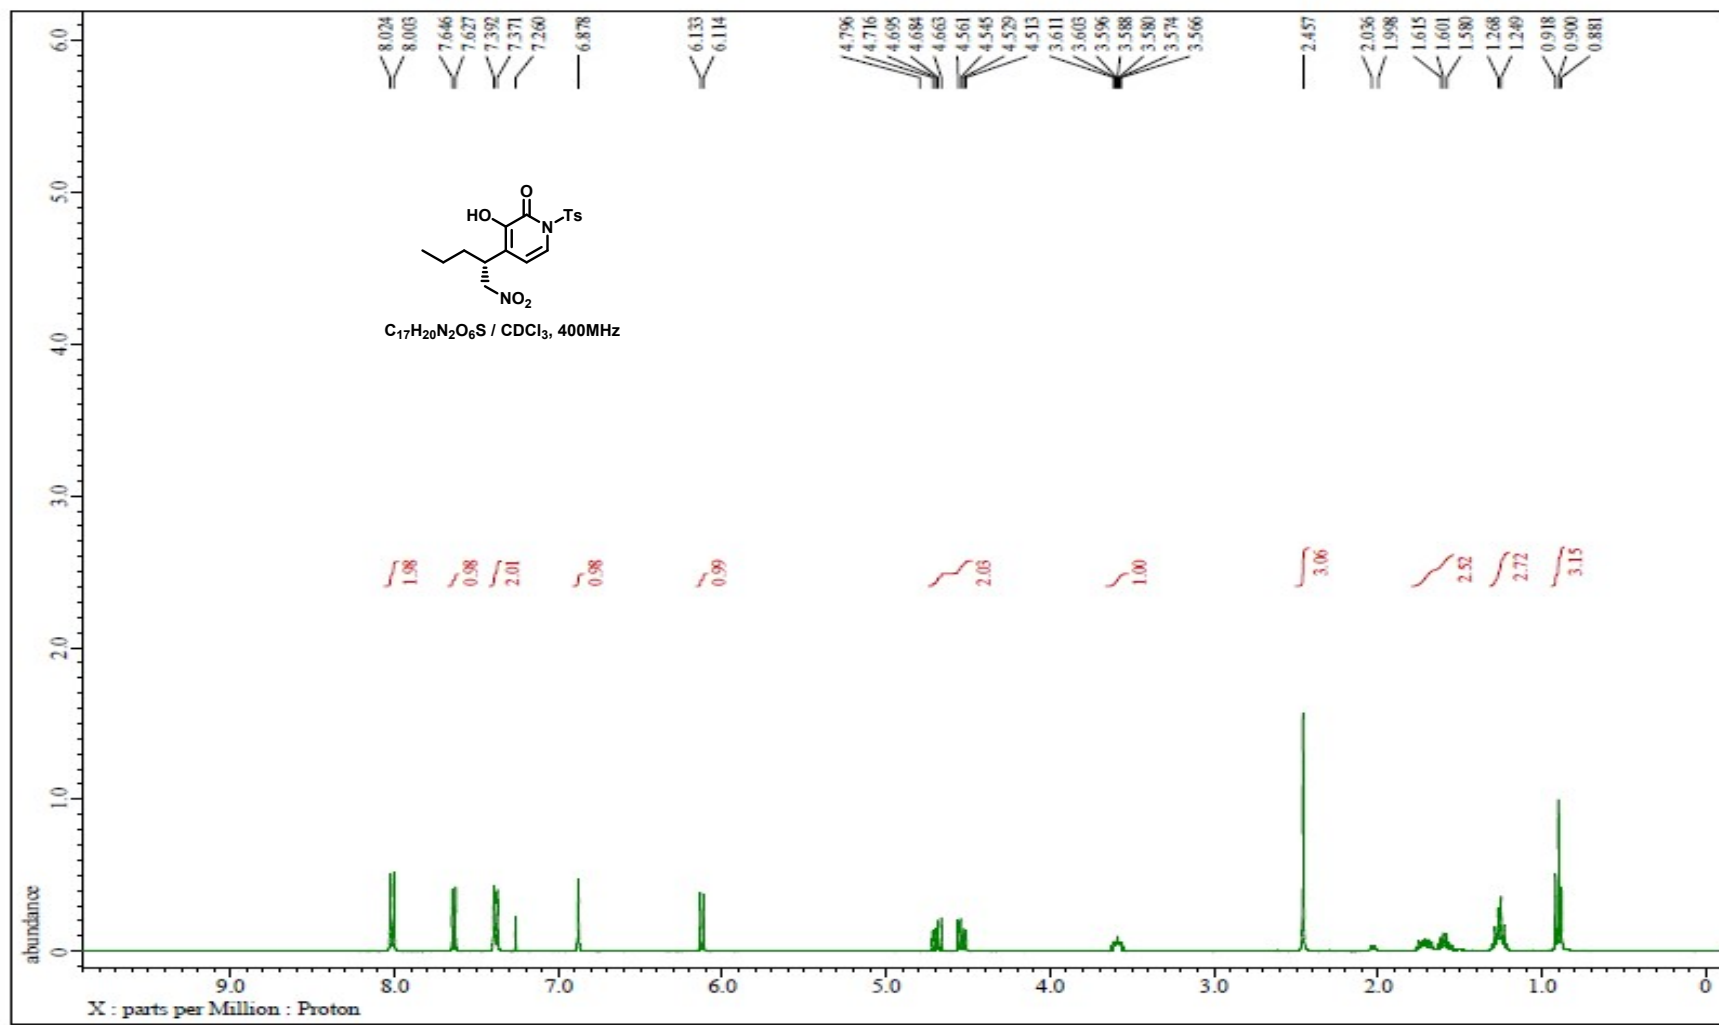

<sup>13</sup>C-NMR of compound (8a)

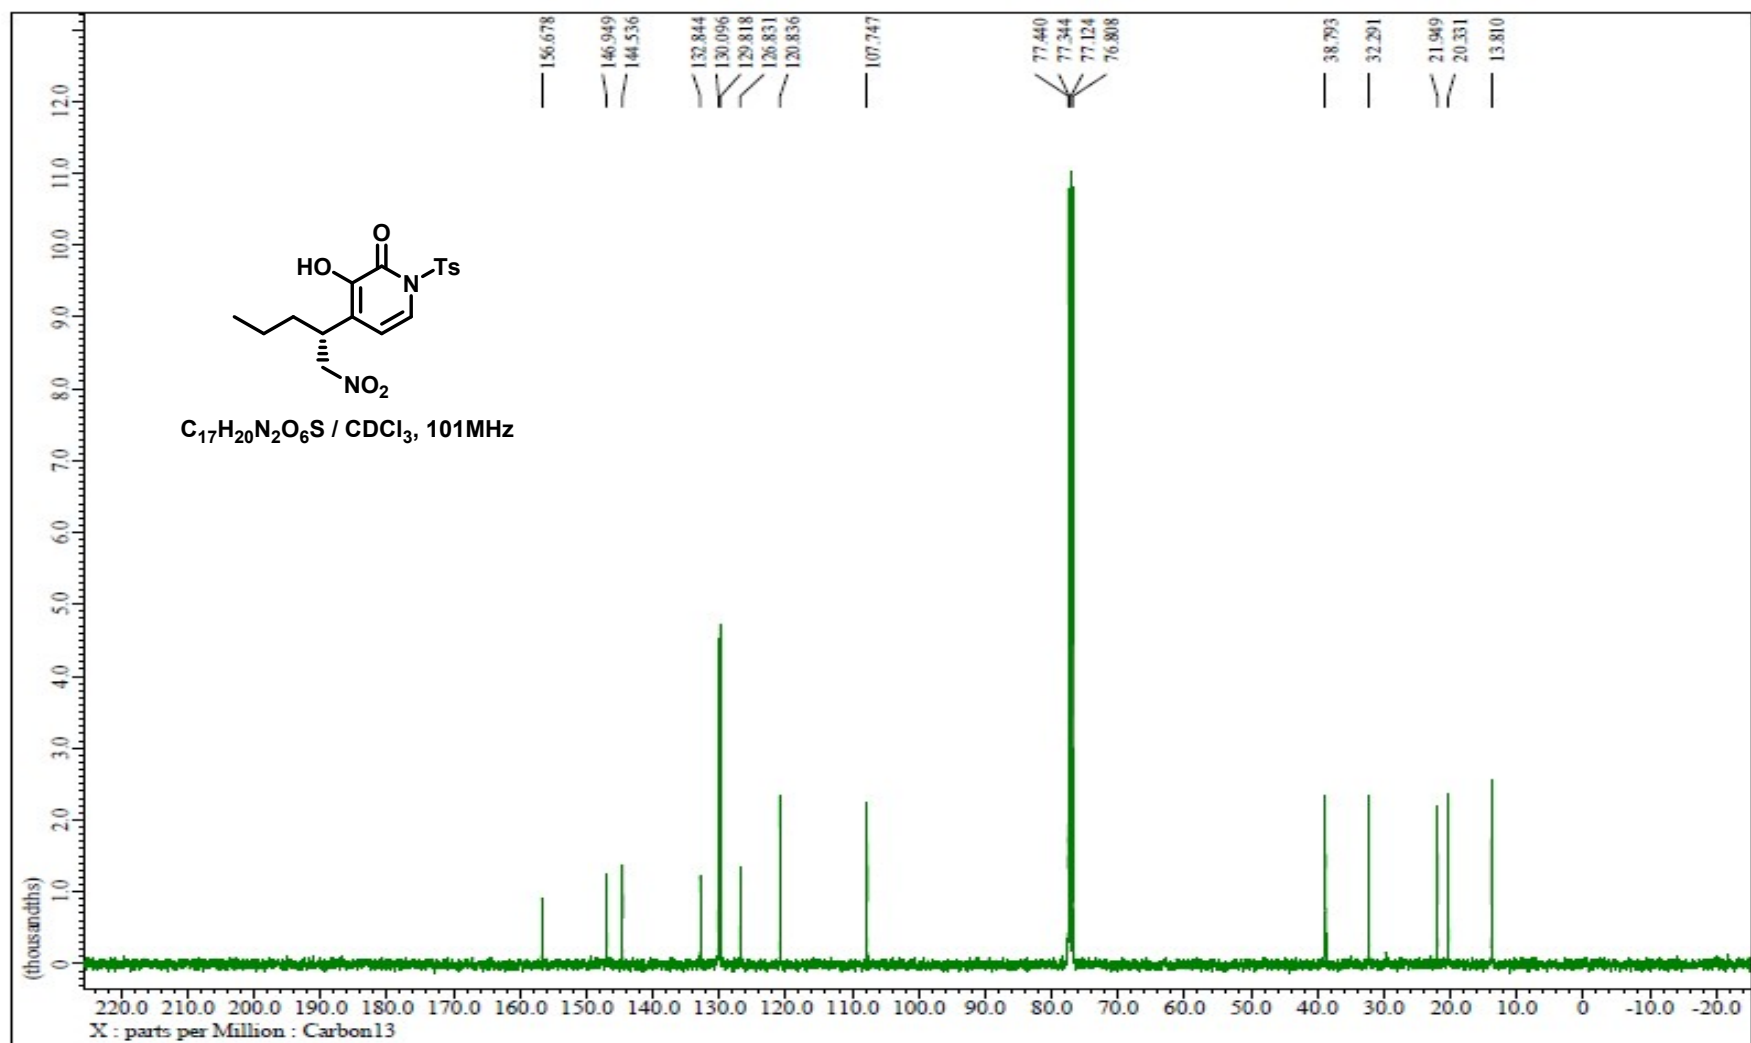



<sup>1</sup>H-NMR of compound (8b)

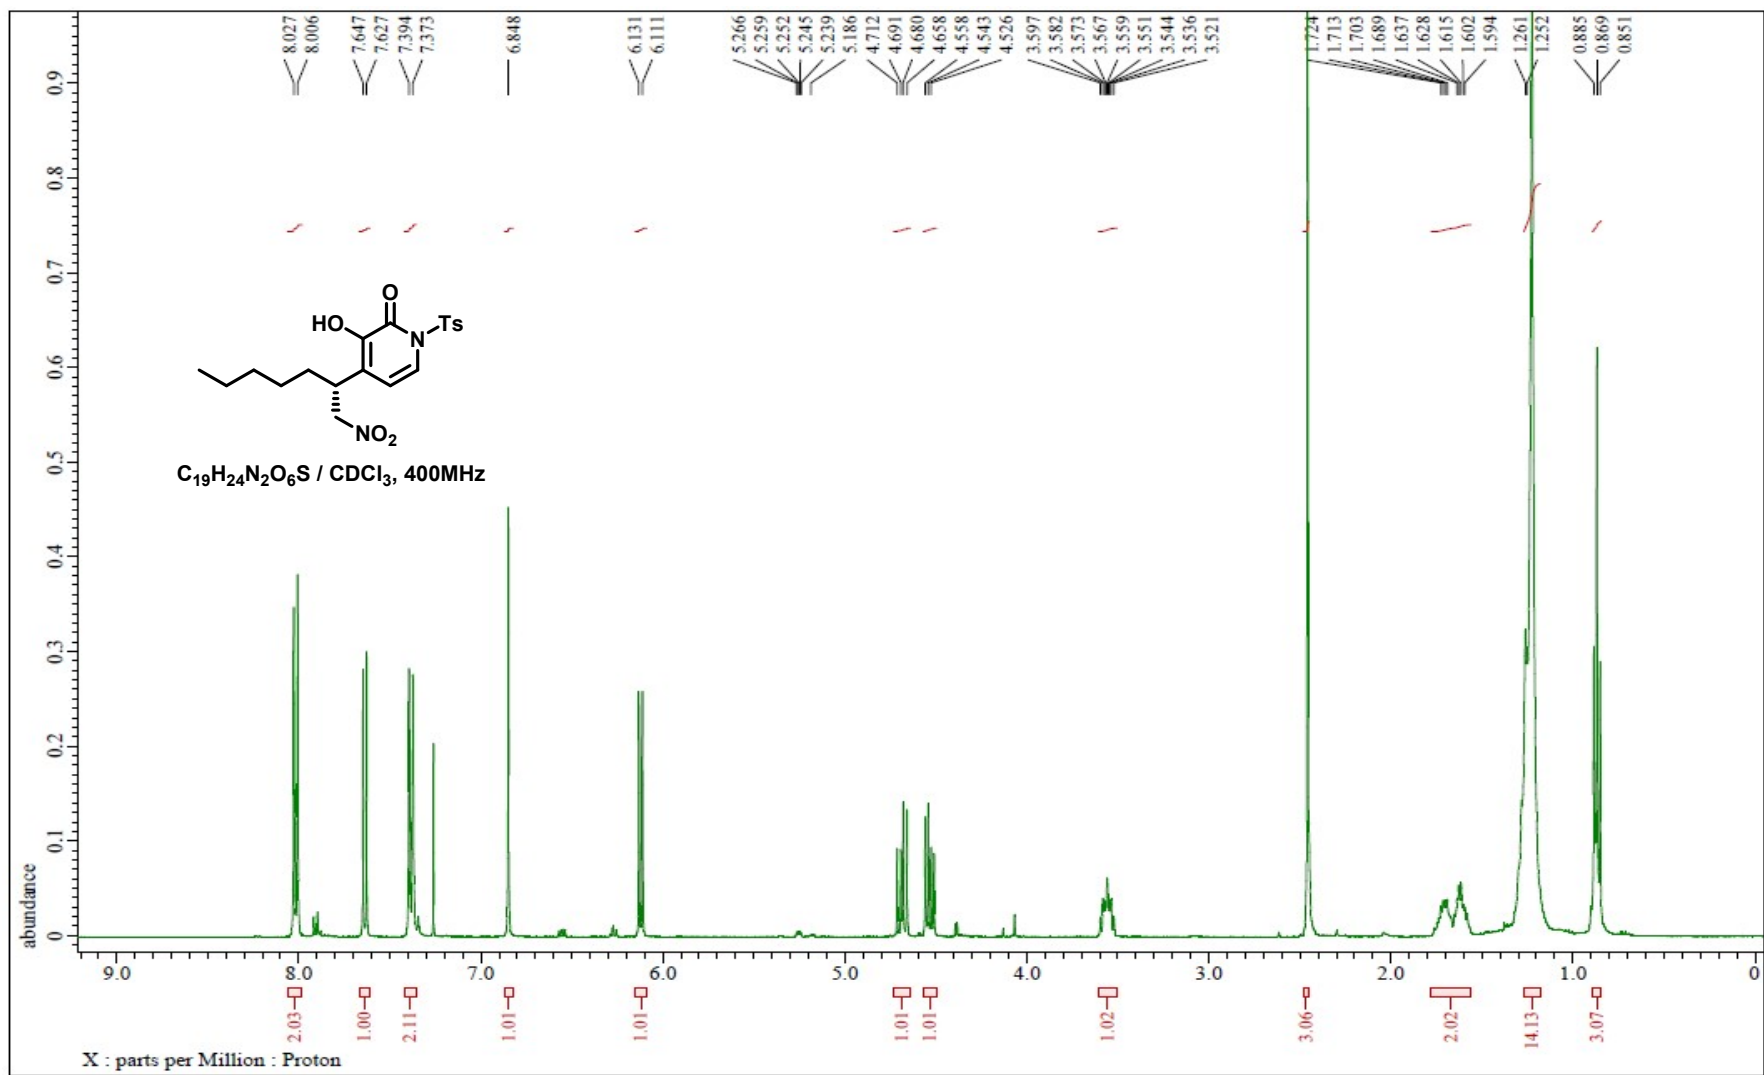

<sup>13</sup>C-NMR of compound (8b)

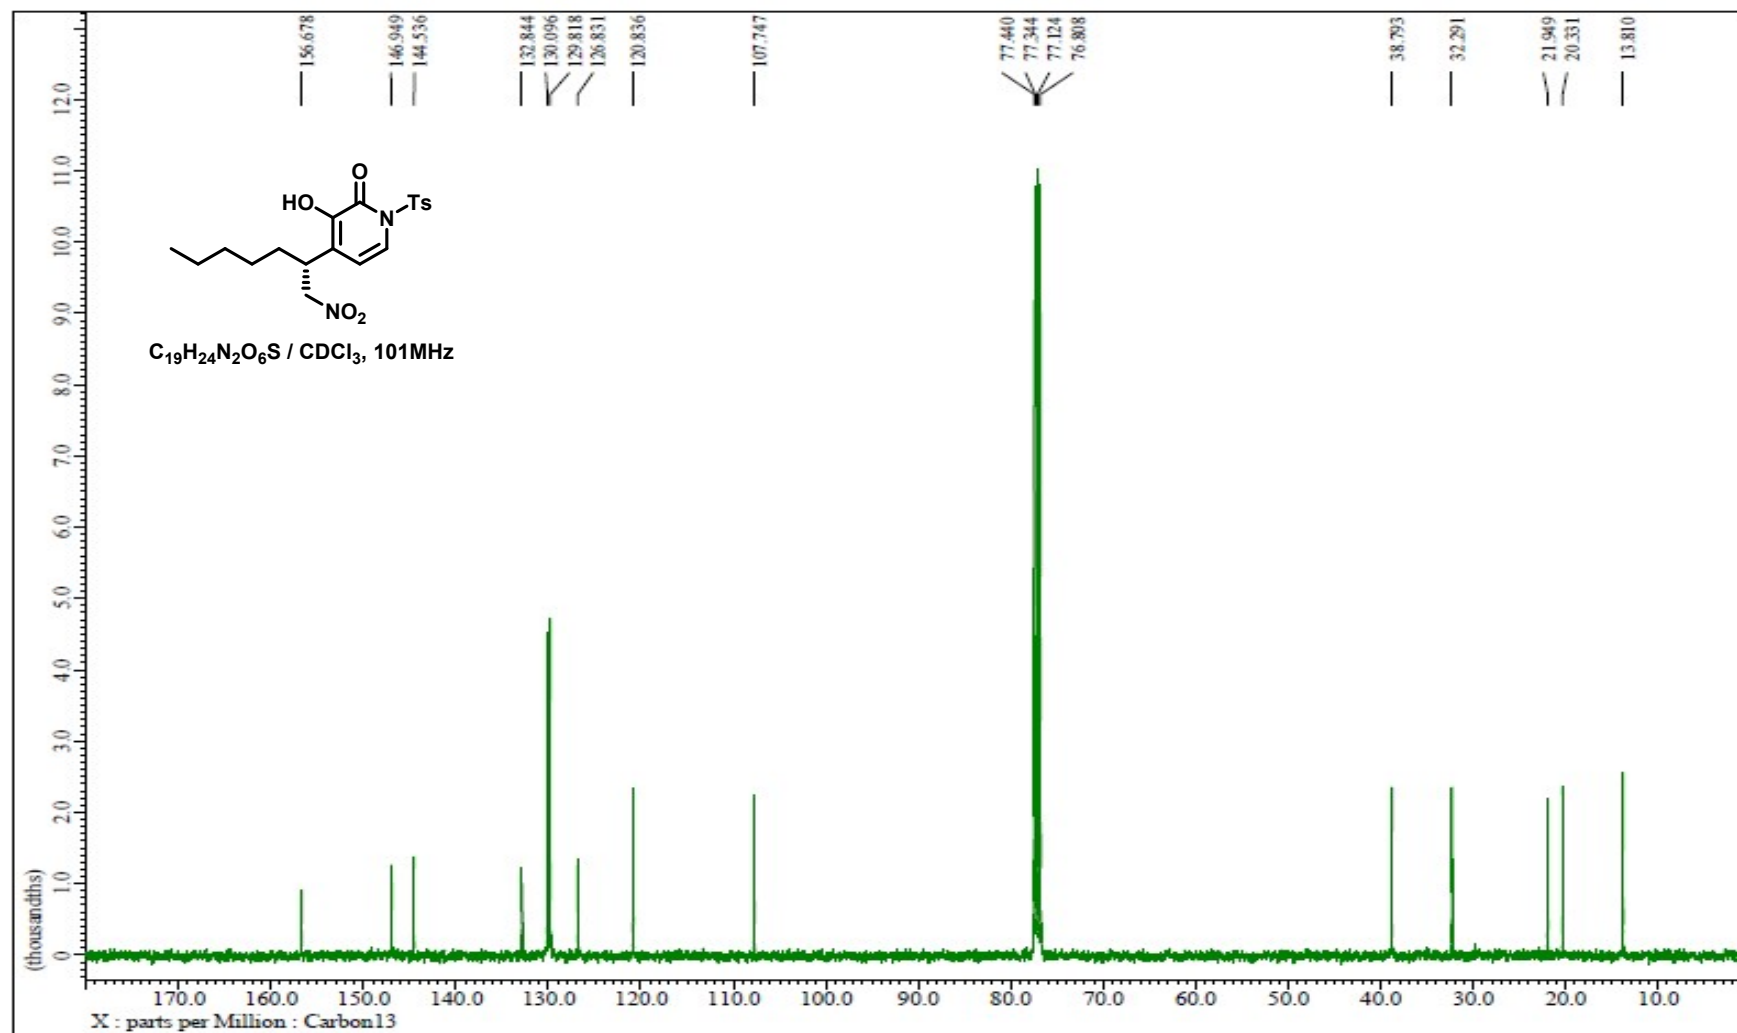

*<sup>1</sup>H-NMR of compound (8c)*

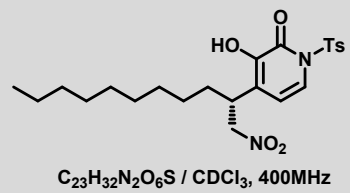

<sup>13</sup>C-NMR of compound (8c)

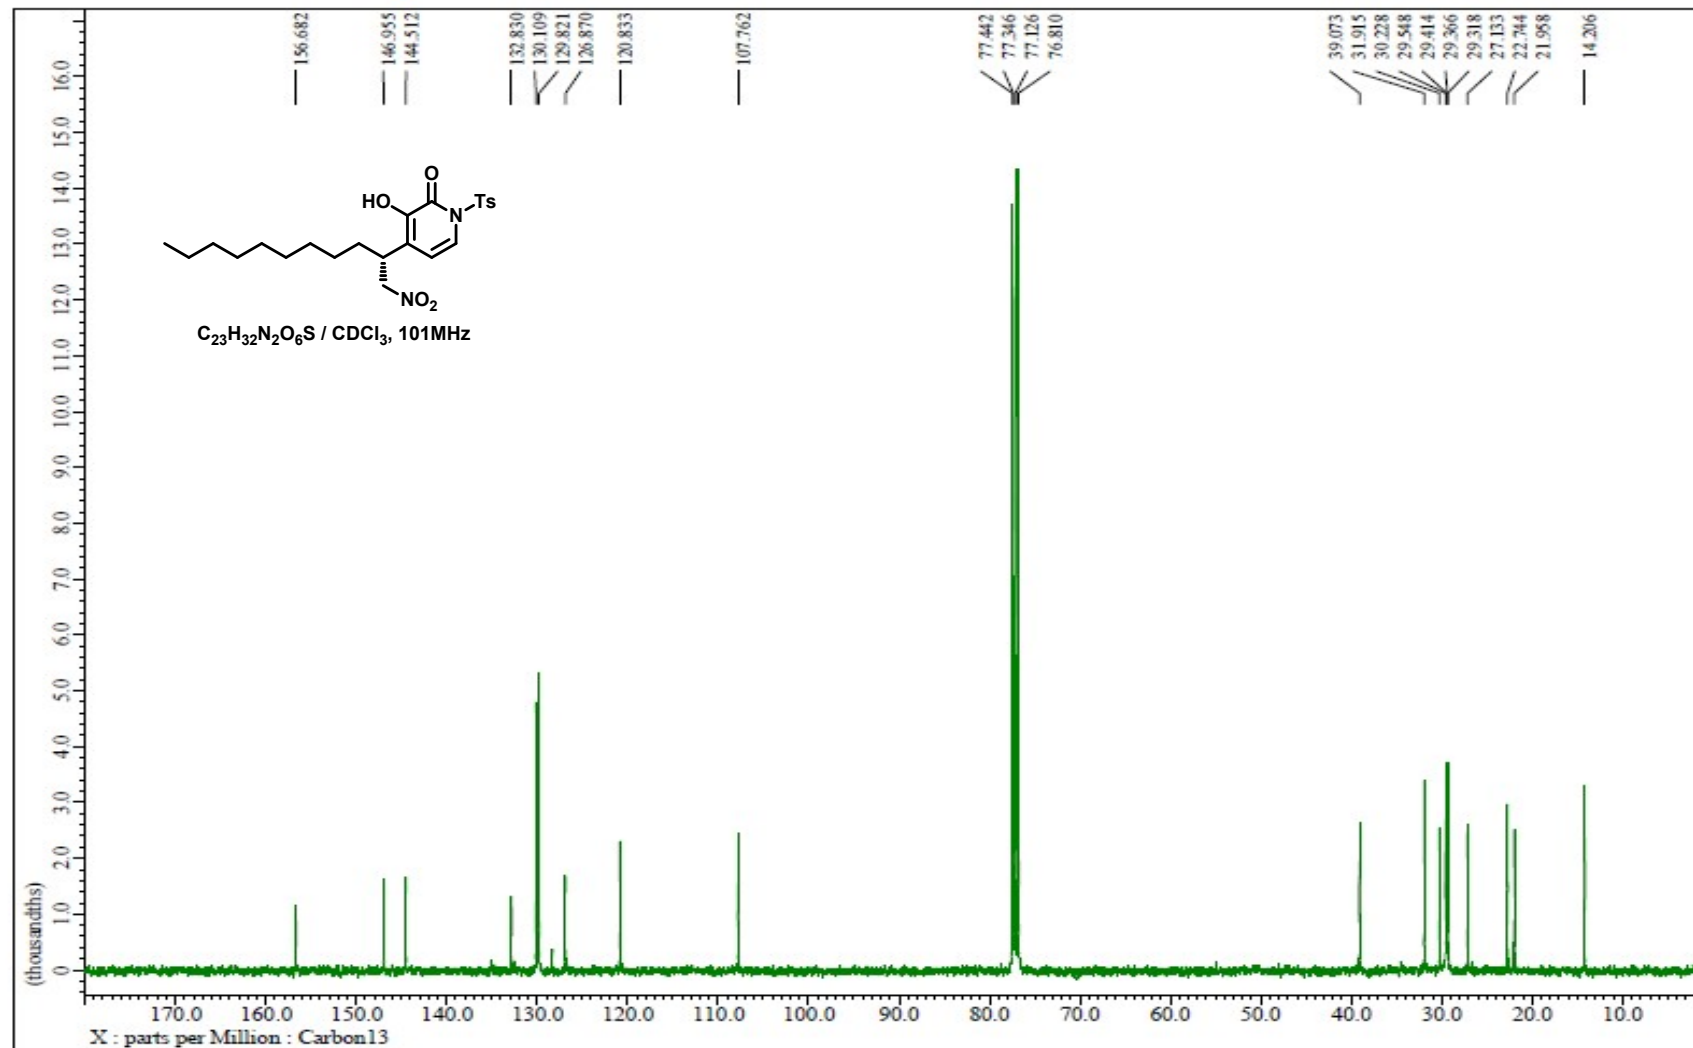

<sup>1</sup>H-NMR of compound (8d)

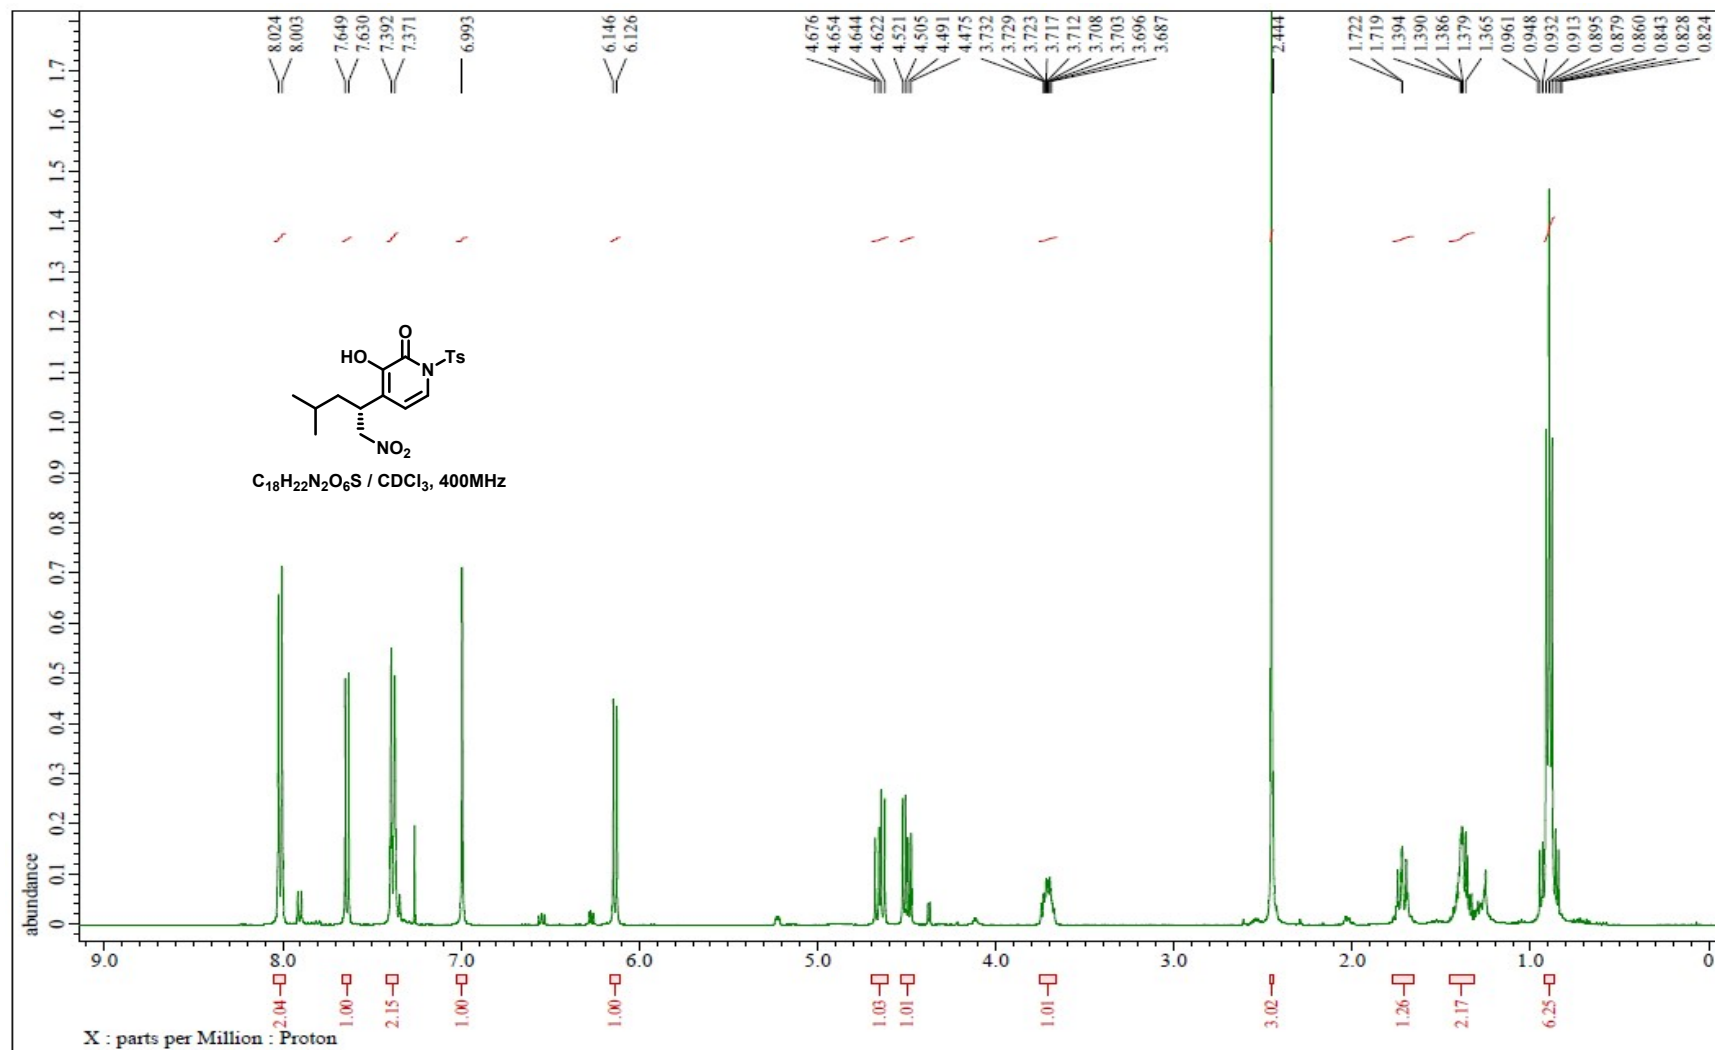

<sup>13</sup>C-NMR of compound (8d)

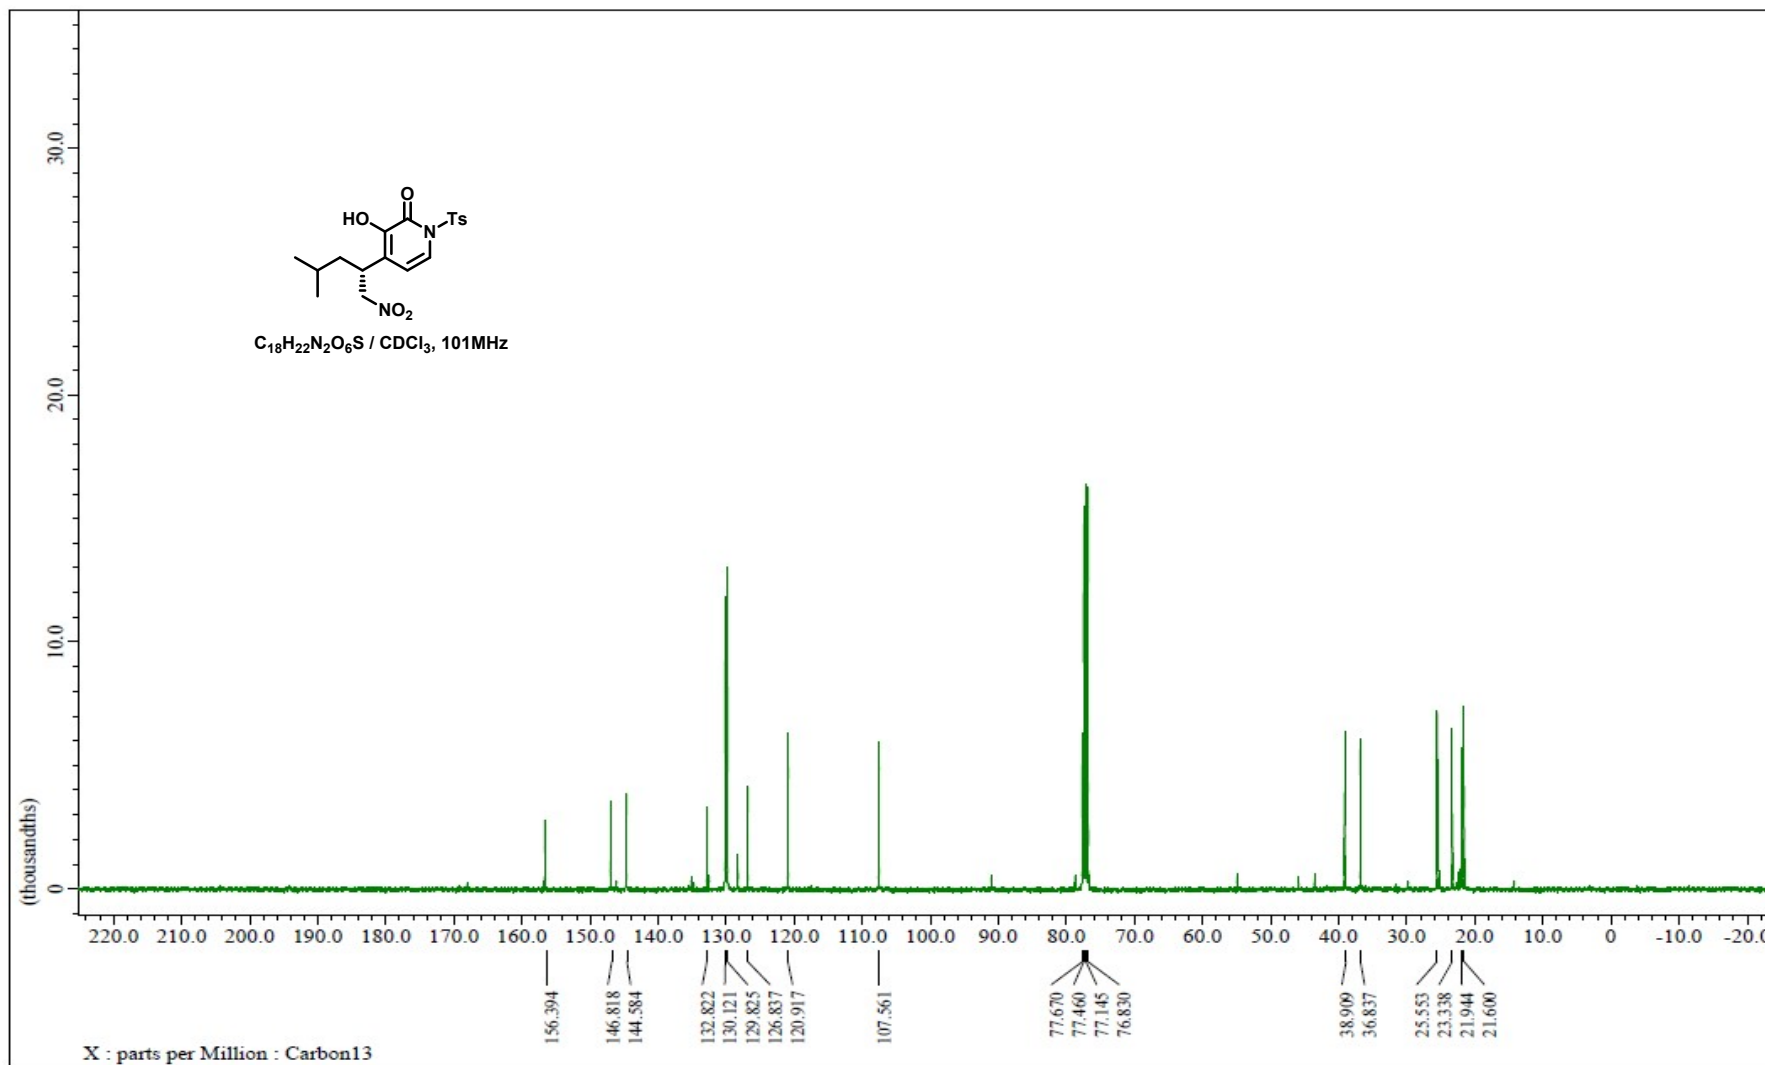

<sup>1</sup>H-NMR of compound (8e)

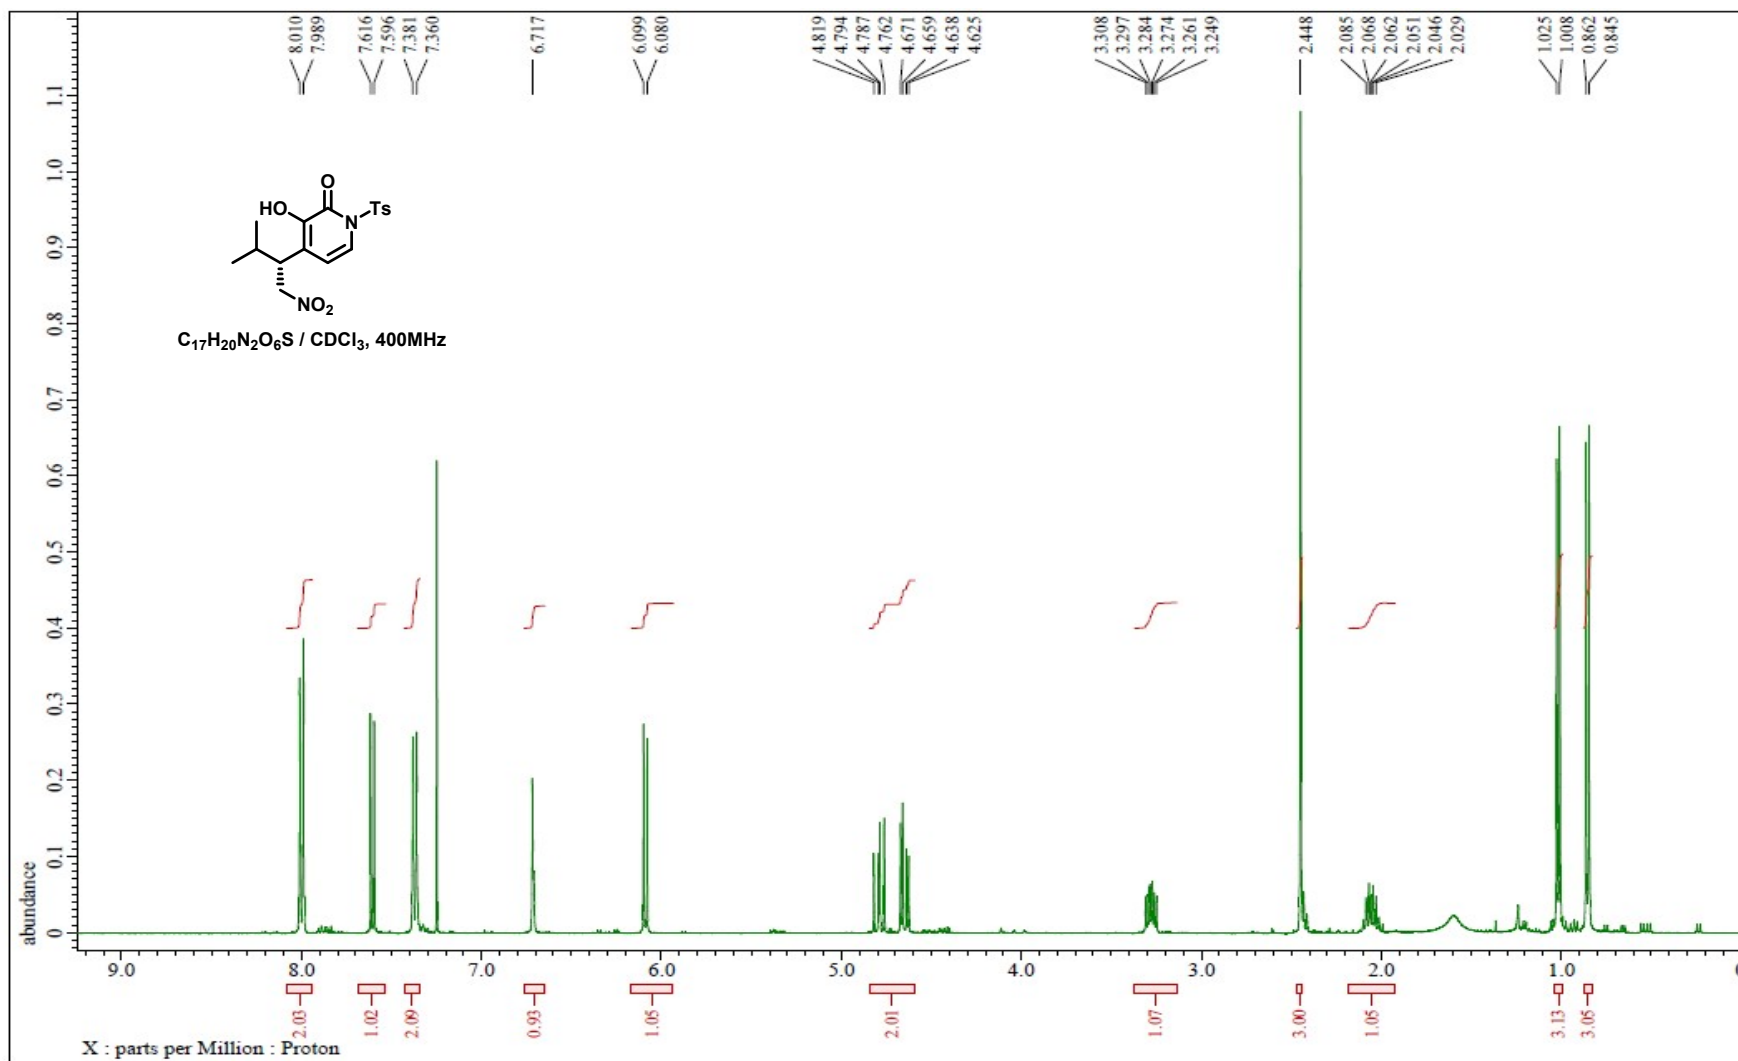

<sup>13</sup>C-NMR of compound (8e)

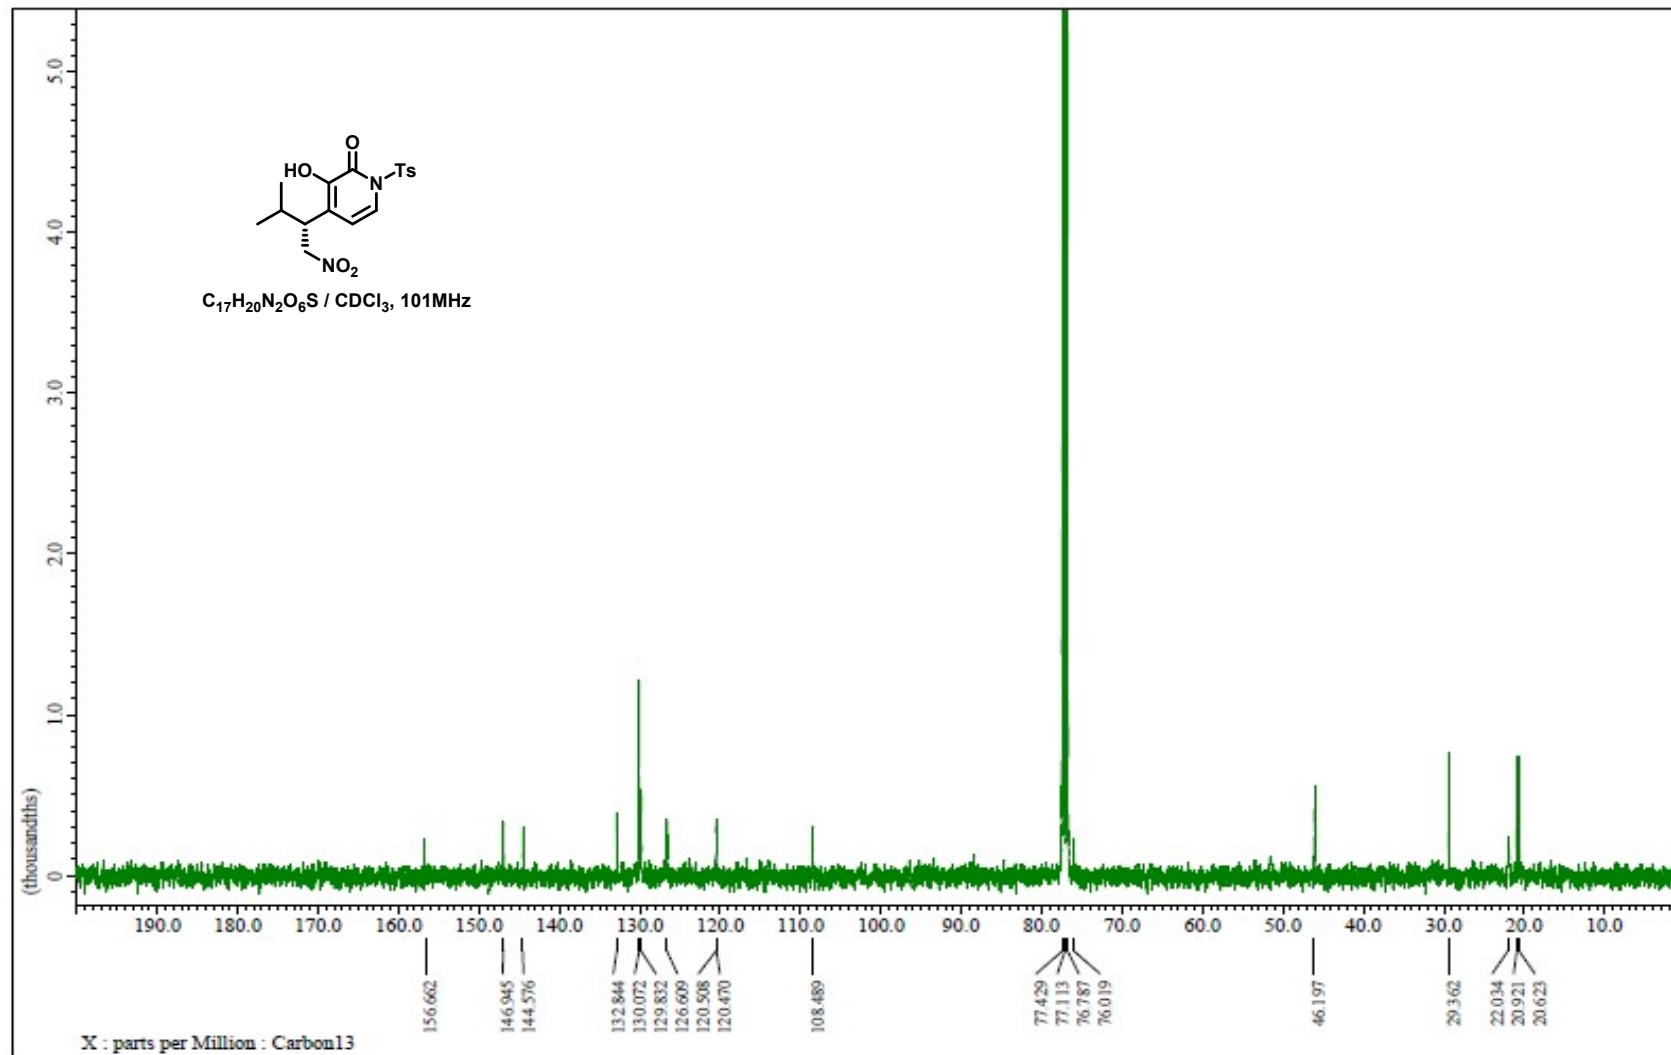



<sup>1</sup>H-NMR of compound (8f)

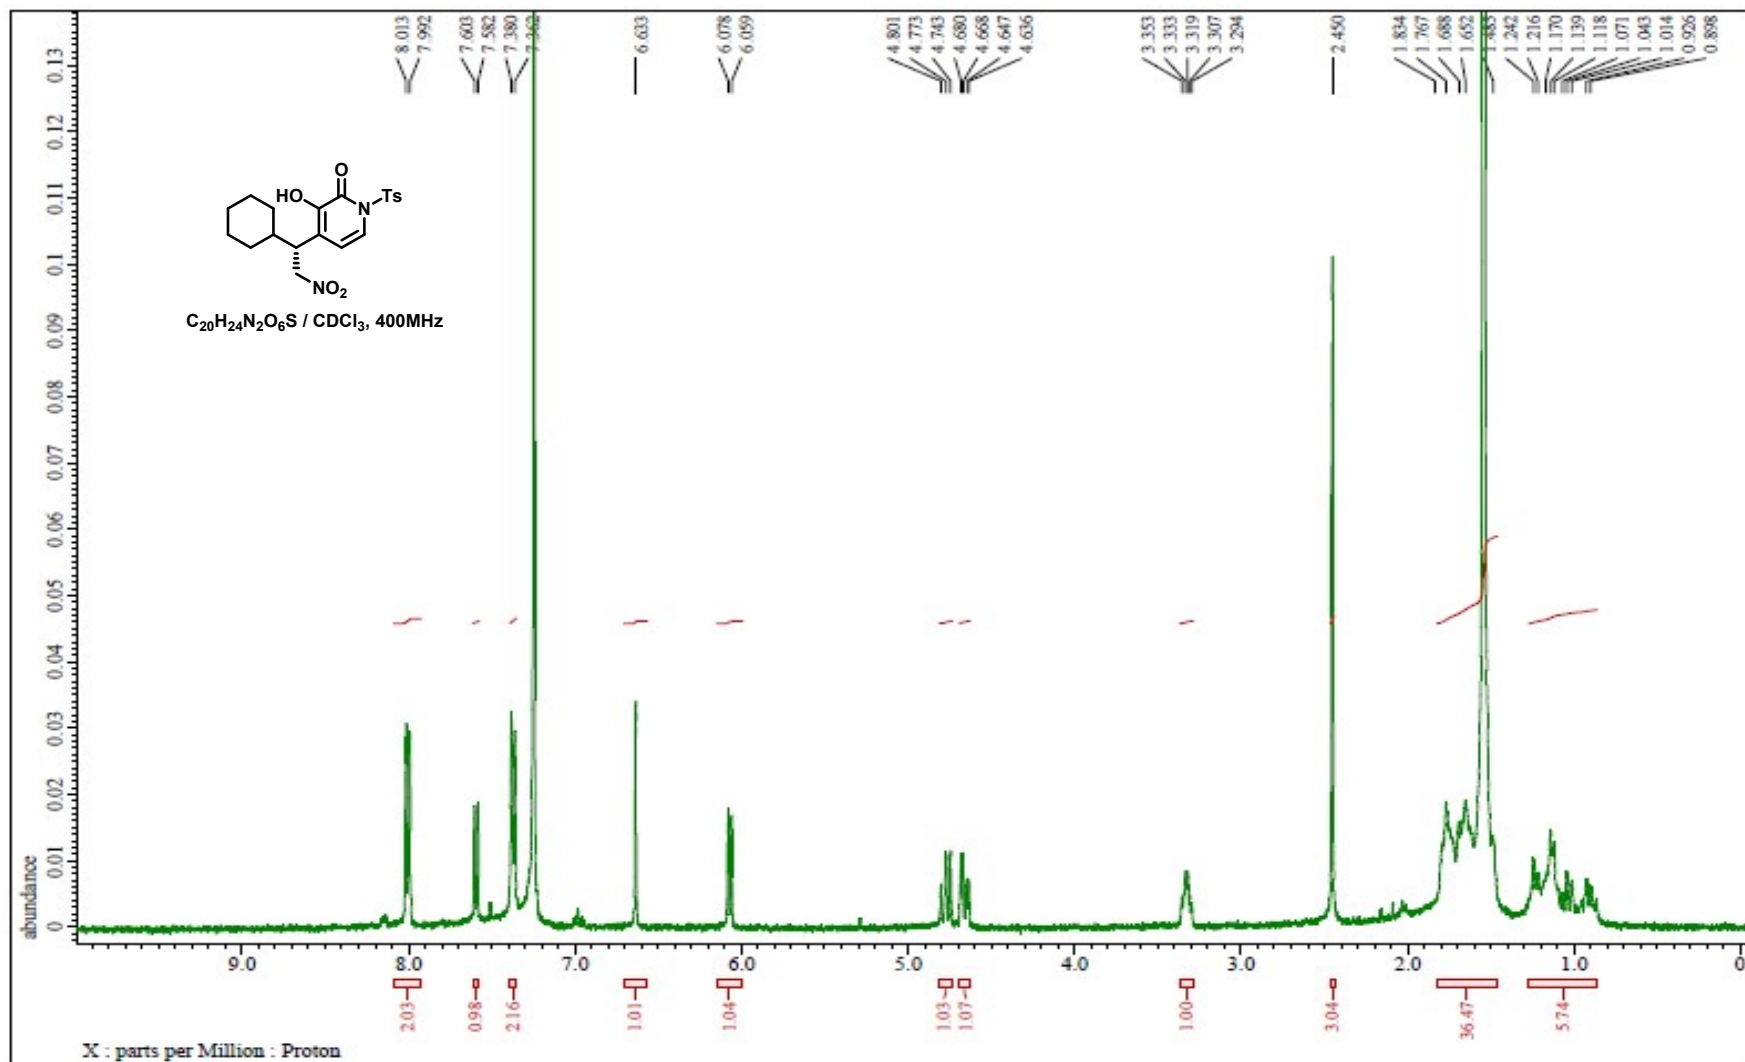

<sup>13</sup>C-NMR of compound (8f)

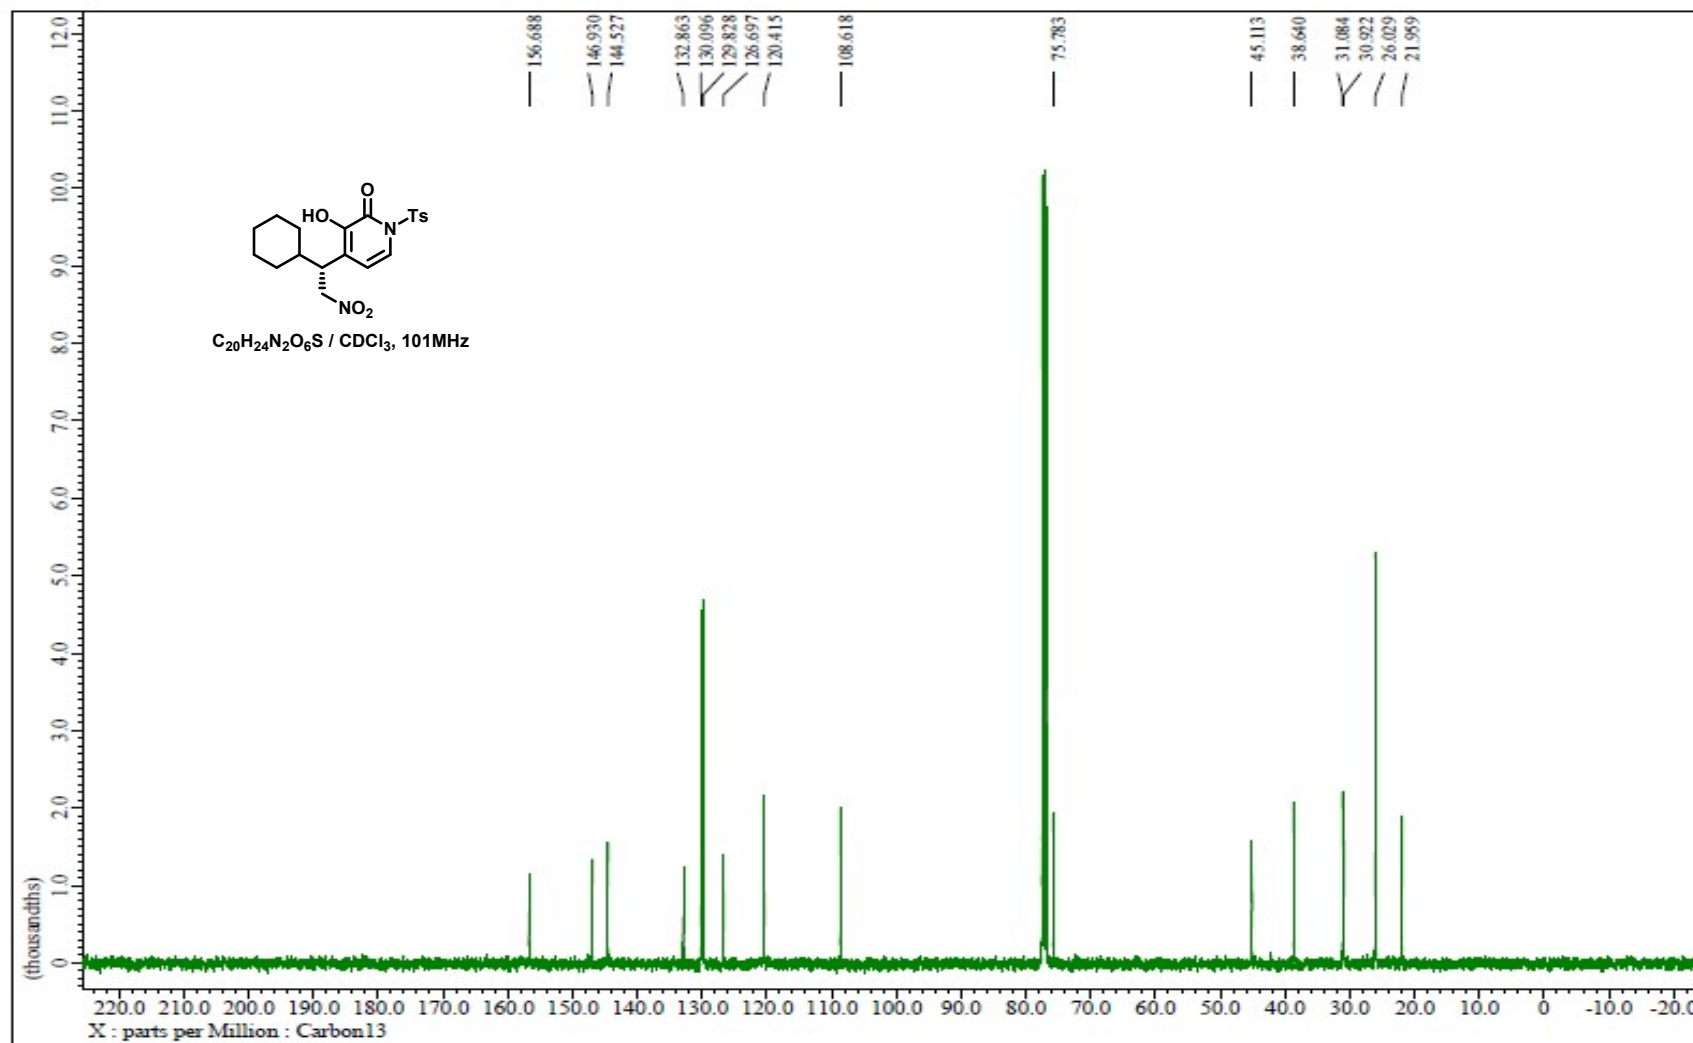

<sup>1</sup>H-NMR of compound (8h)

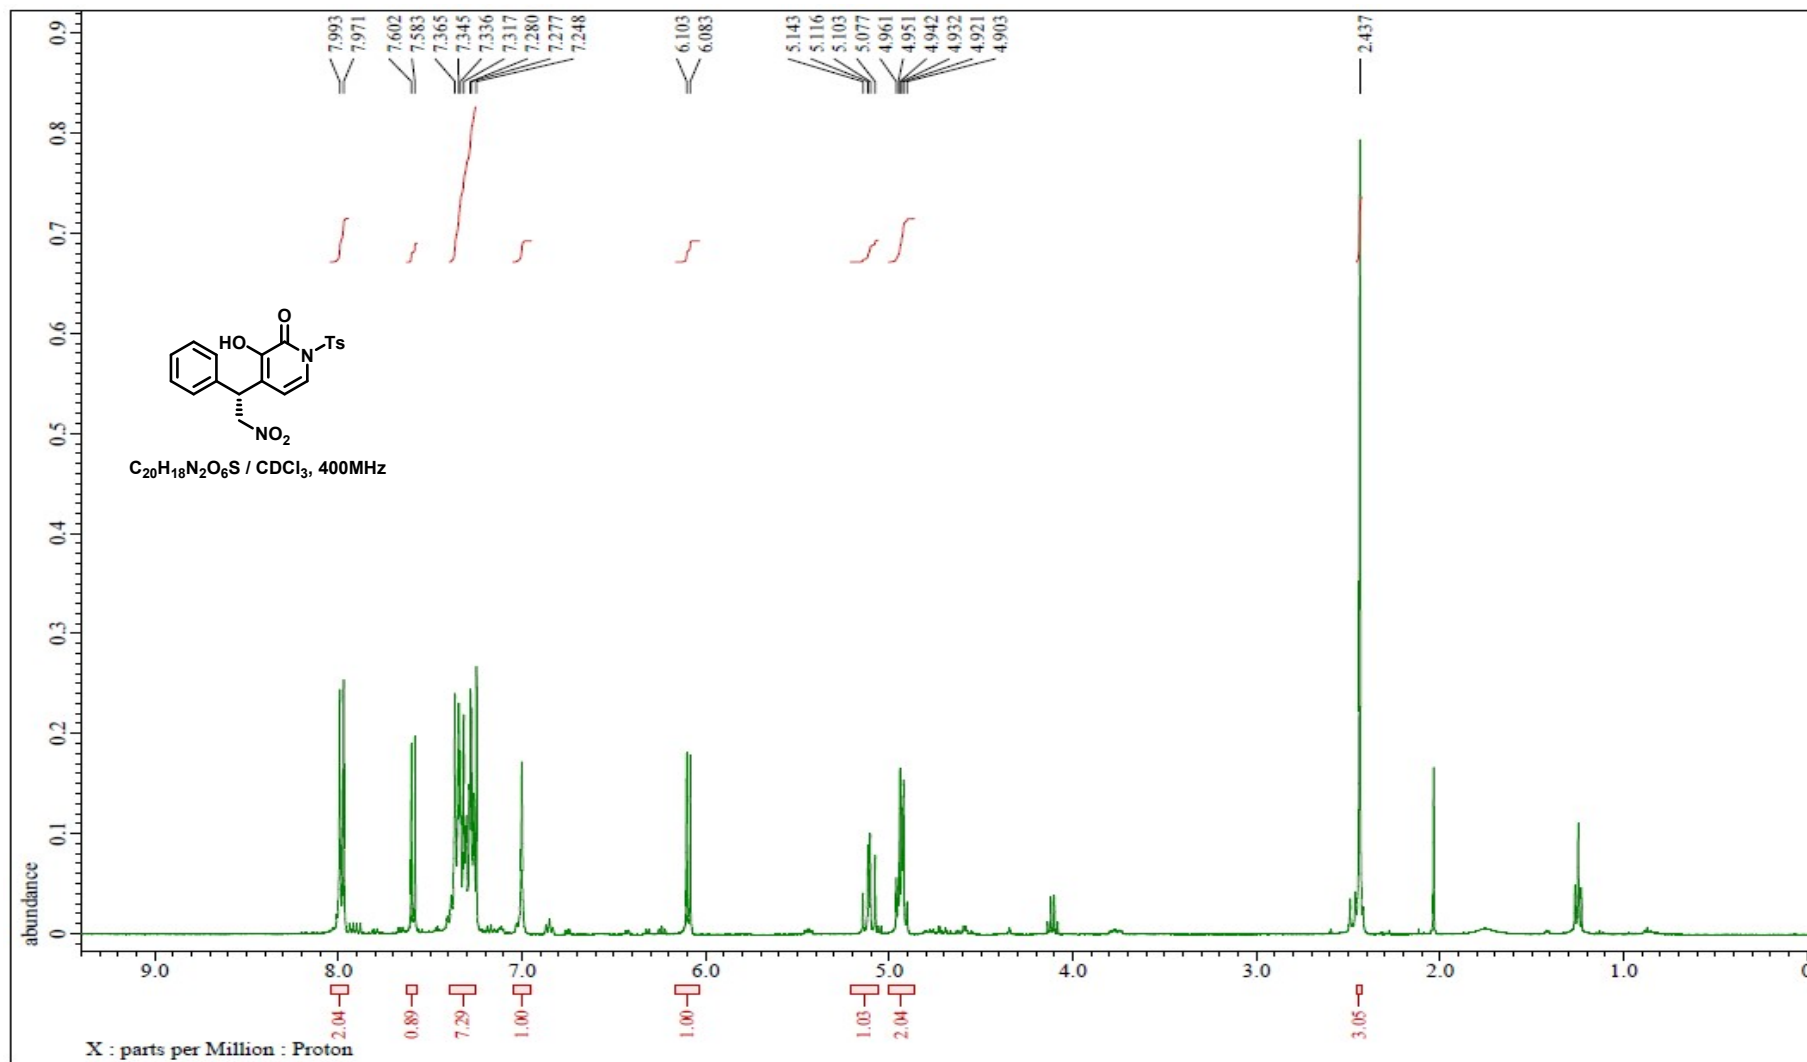

<sup>13</sup>C-NMR of compound (8h)

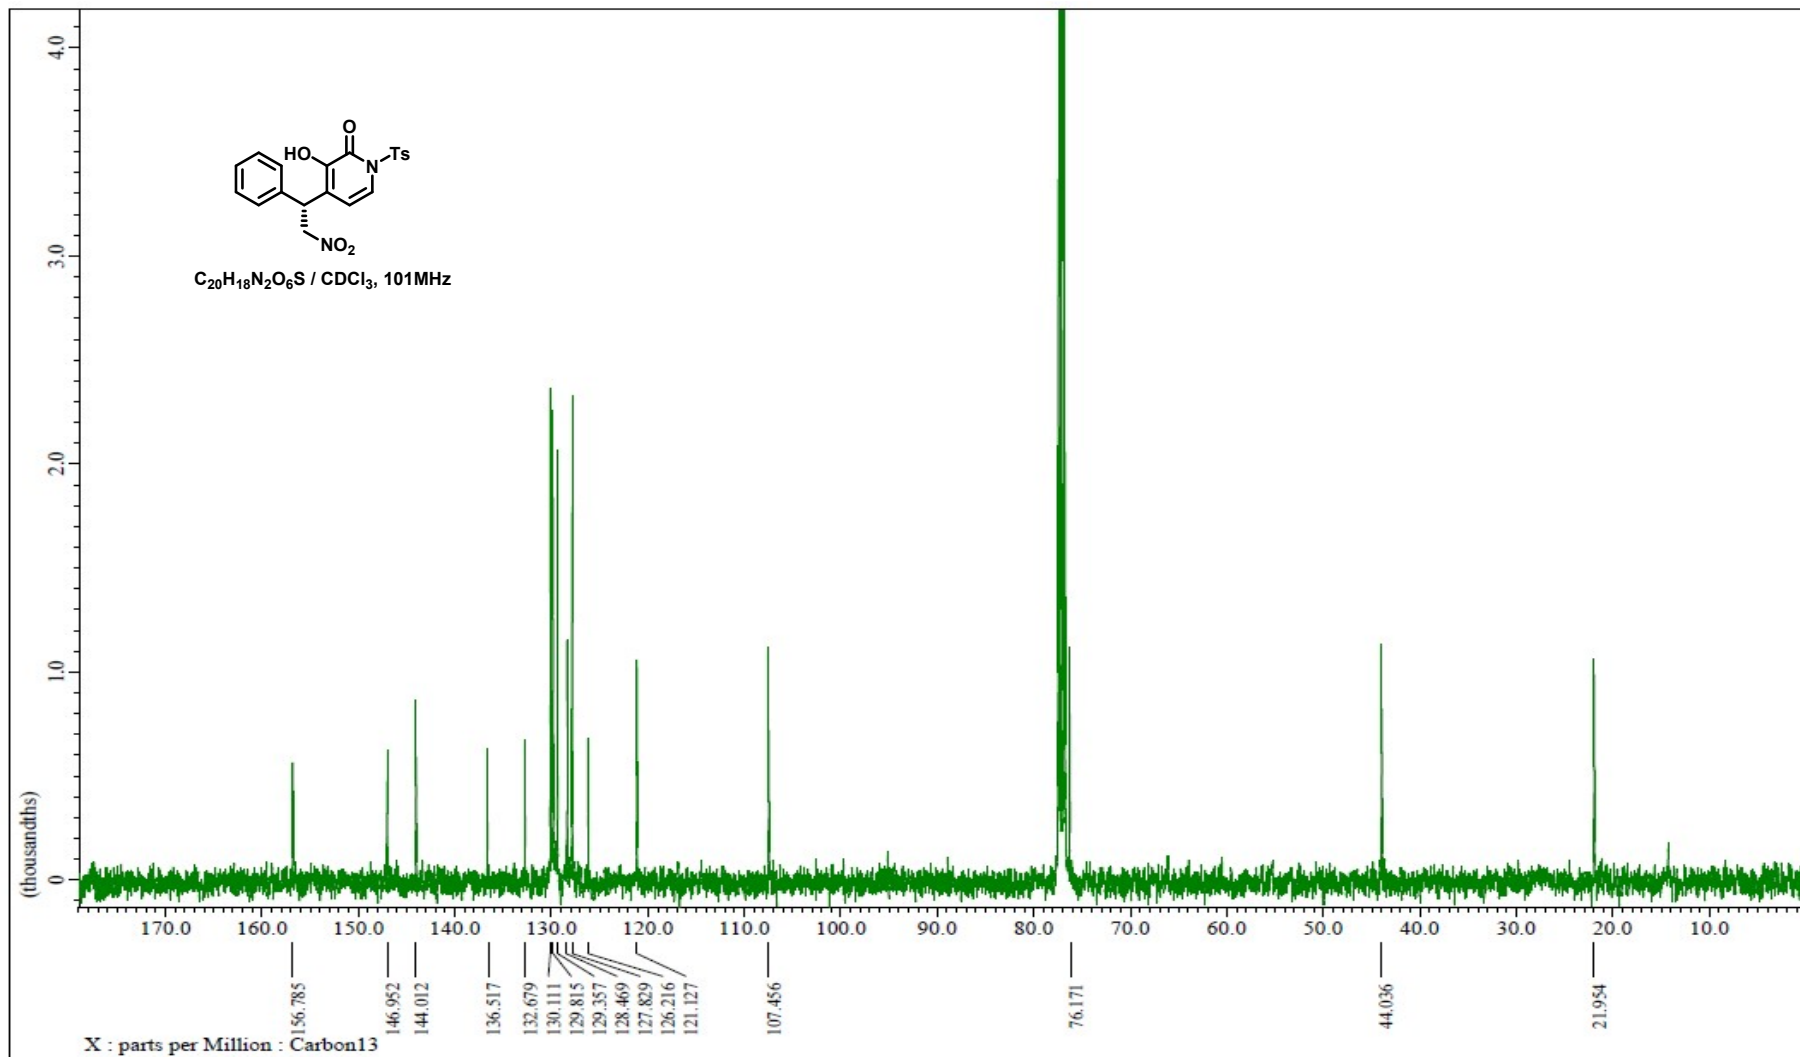

<sup>1</sup>H-NMR of compound (8i)

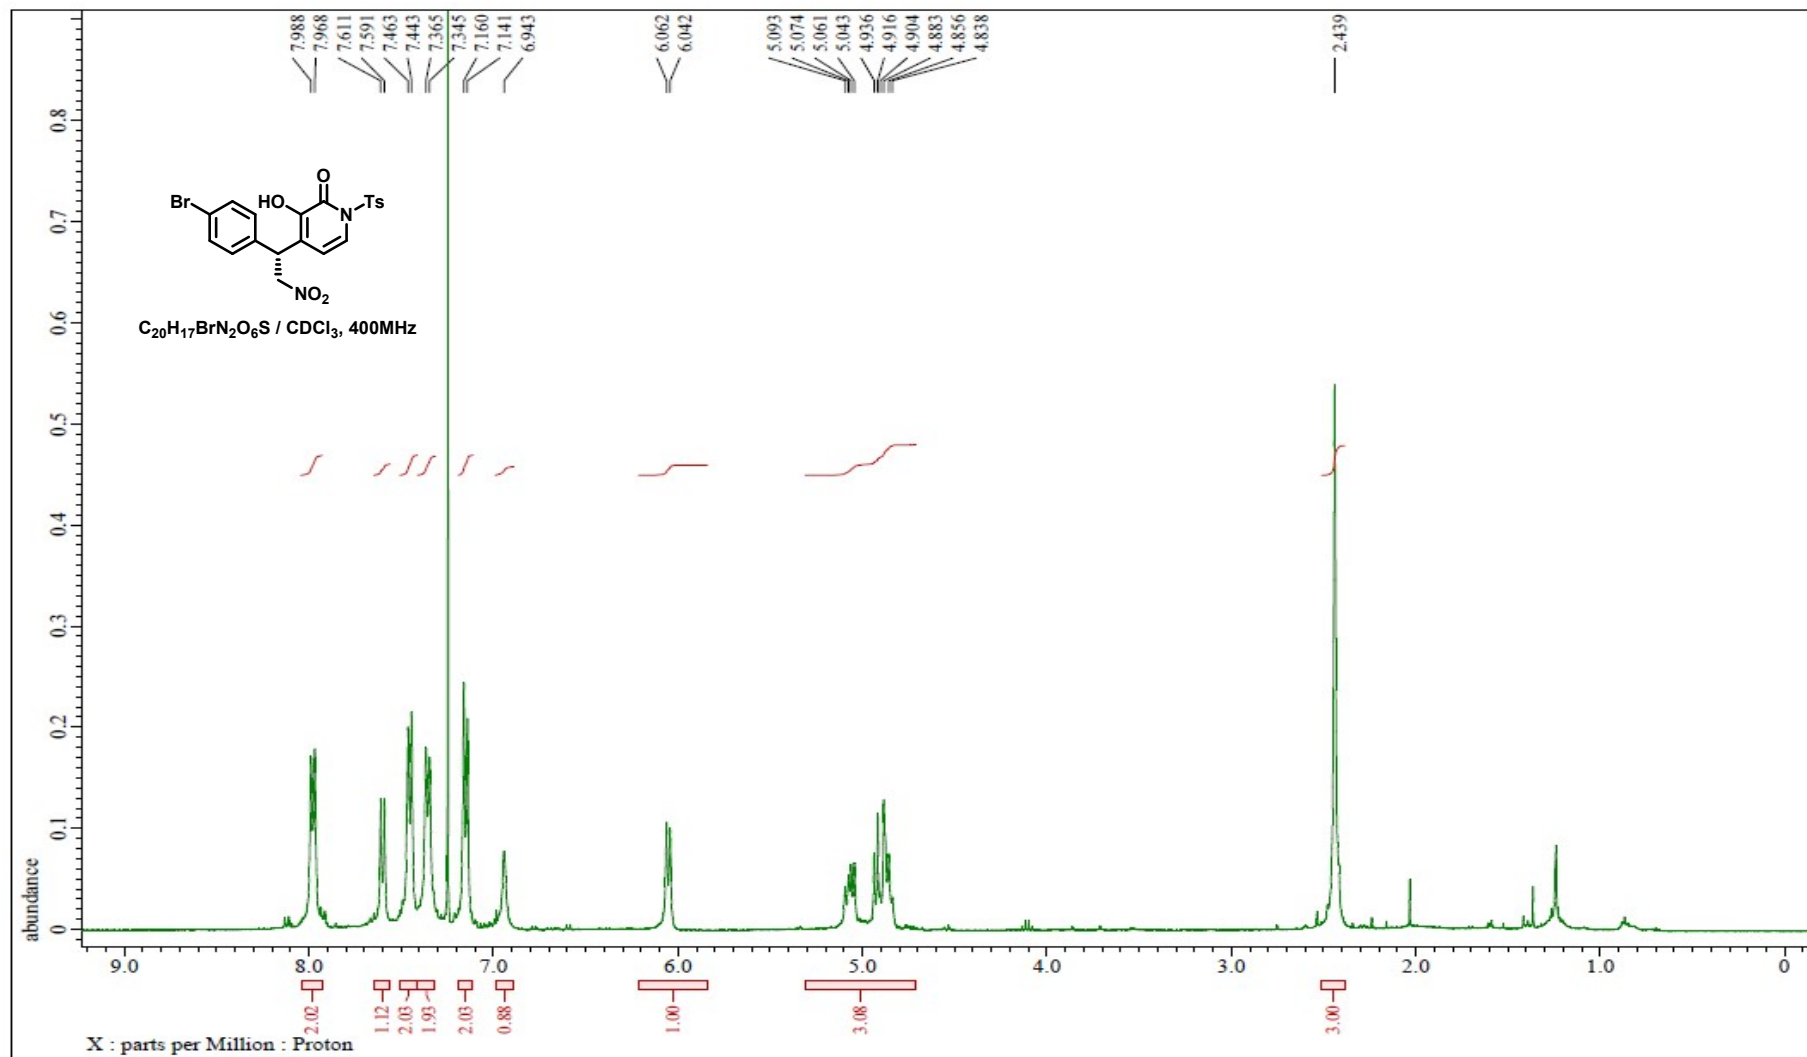

<sup>13</sup>C-NMR of compound (8i)

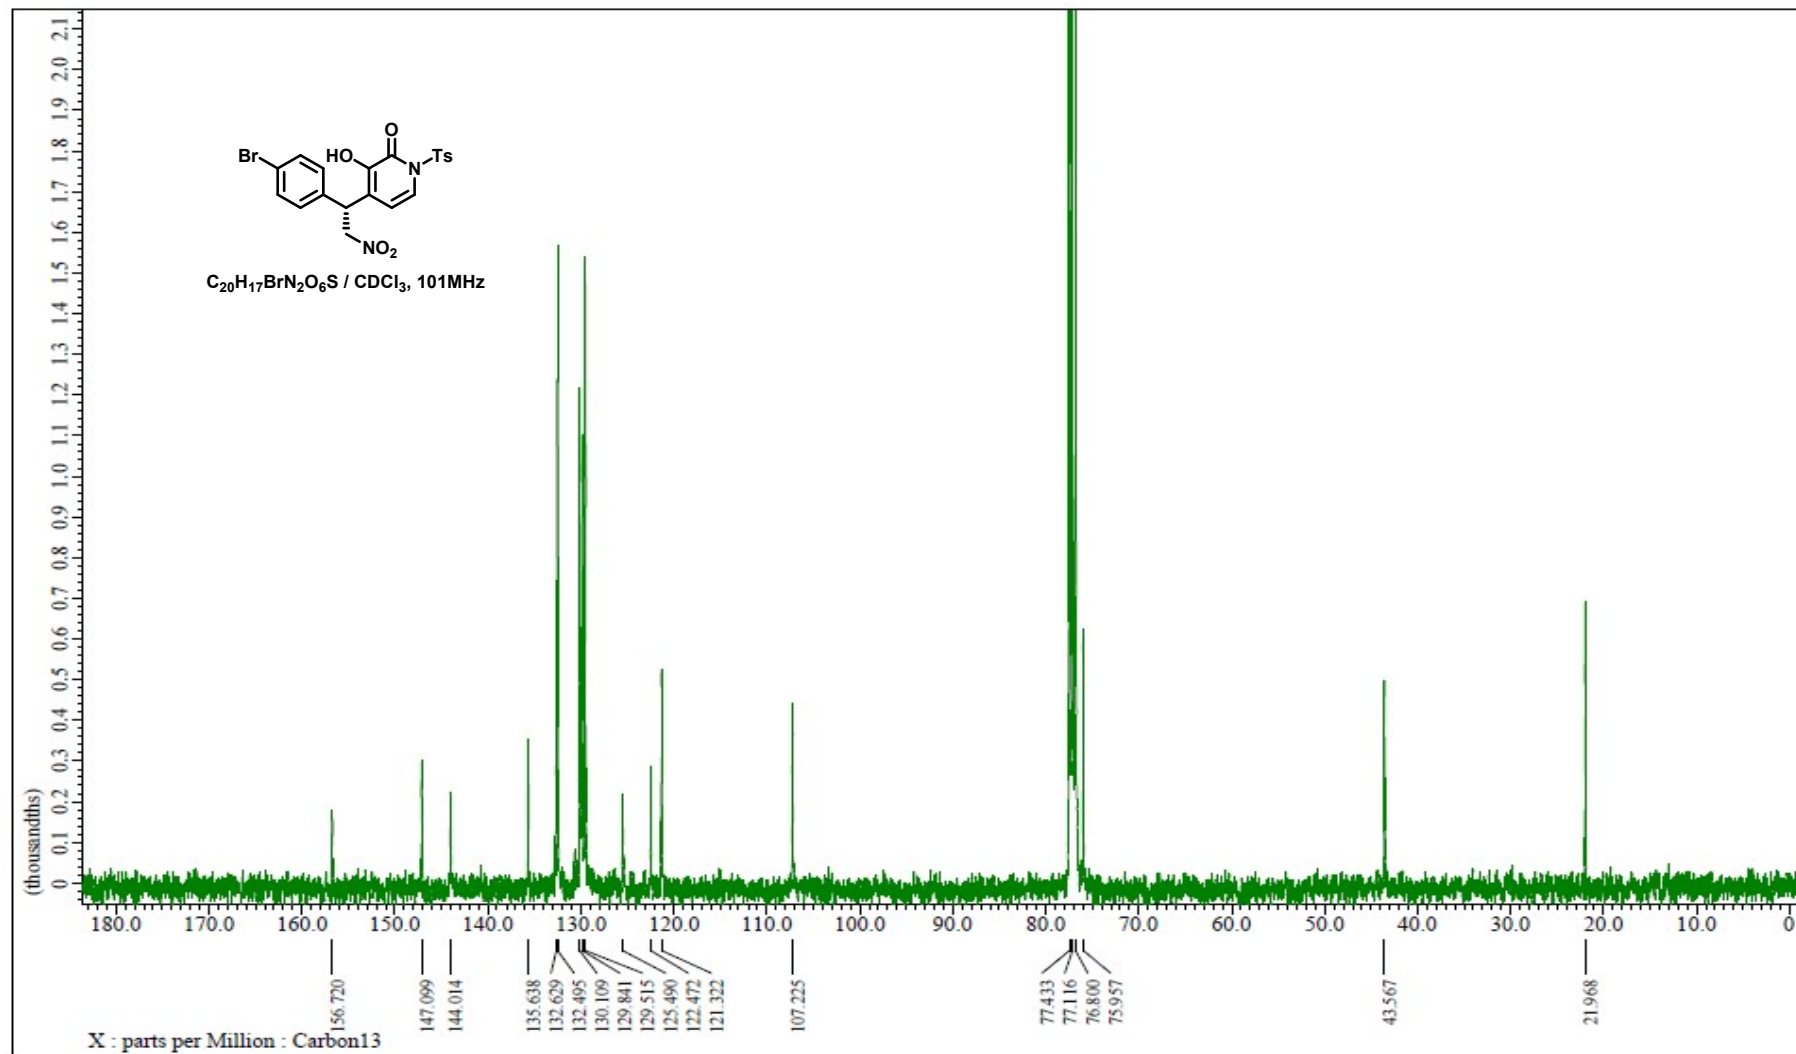

<sup>1</sup>H-NMR of compound (8j)

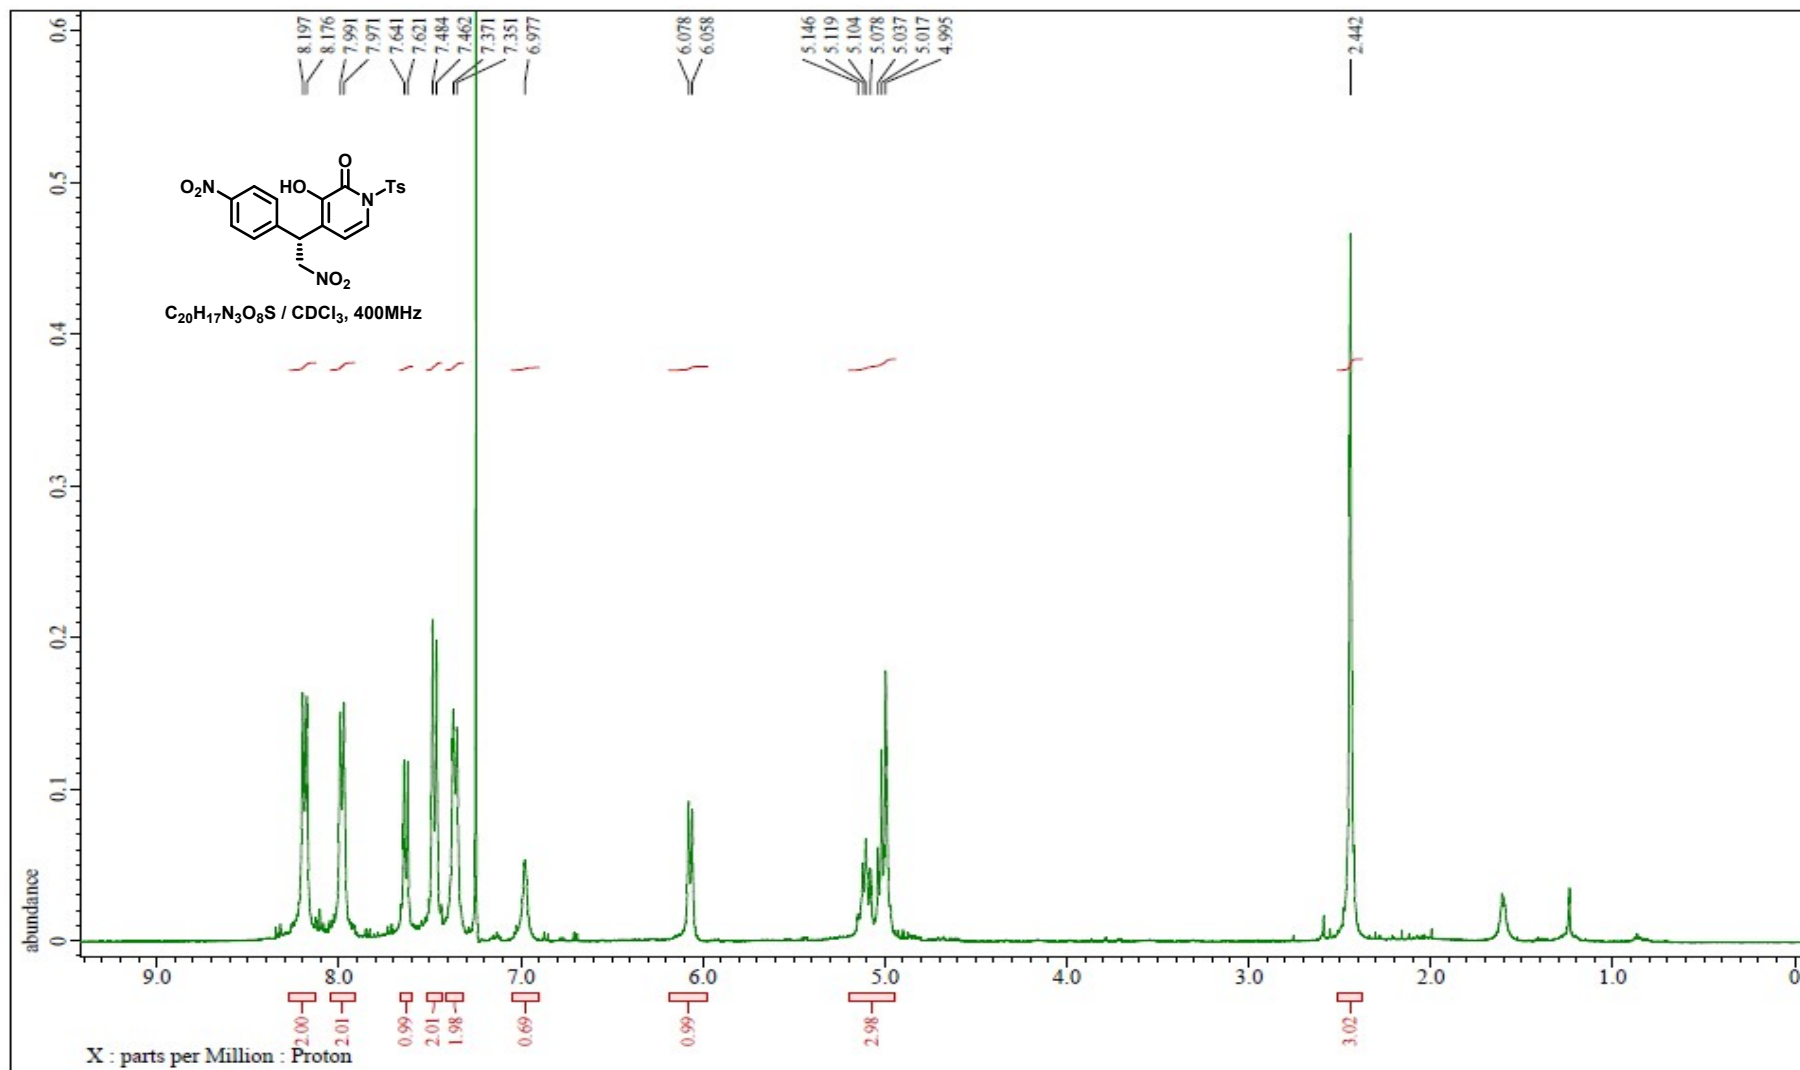

<sup>13</sup>C-NMR of compound (8j)

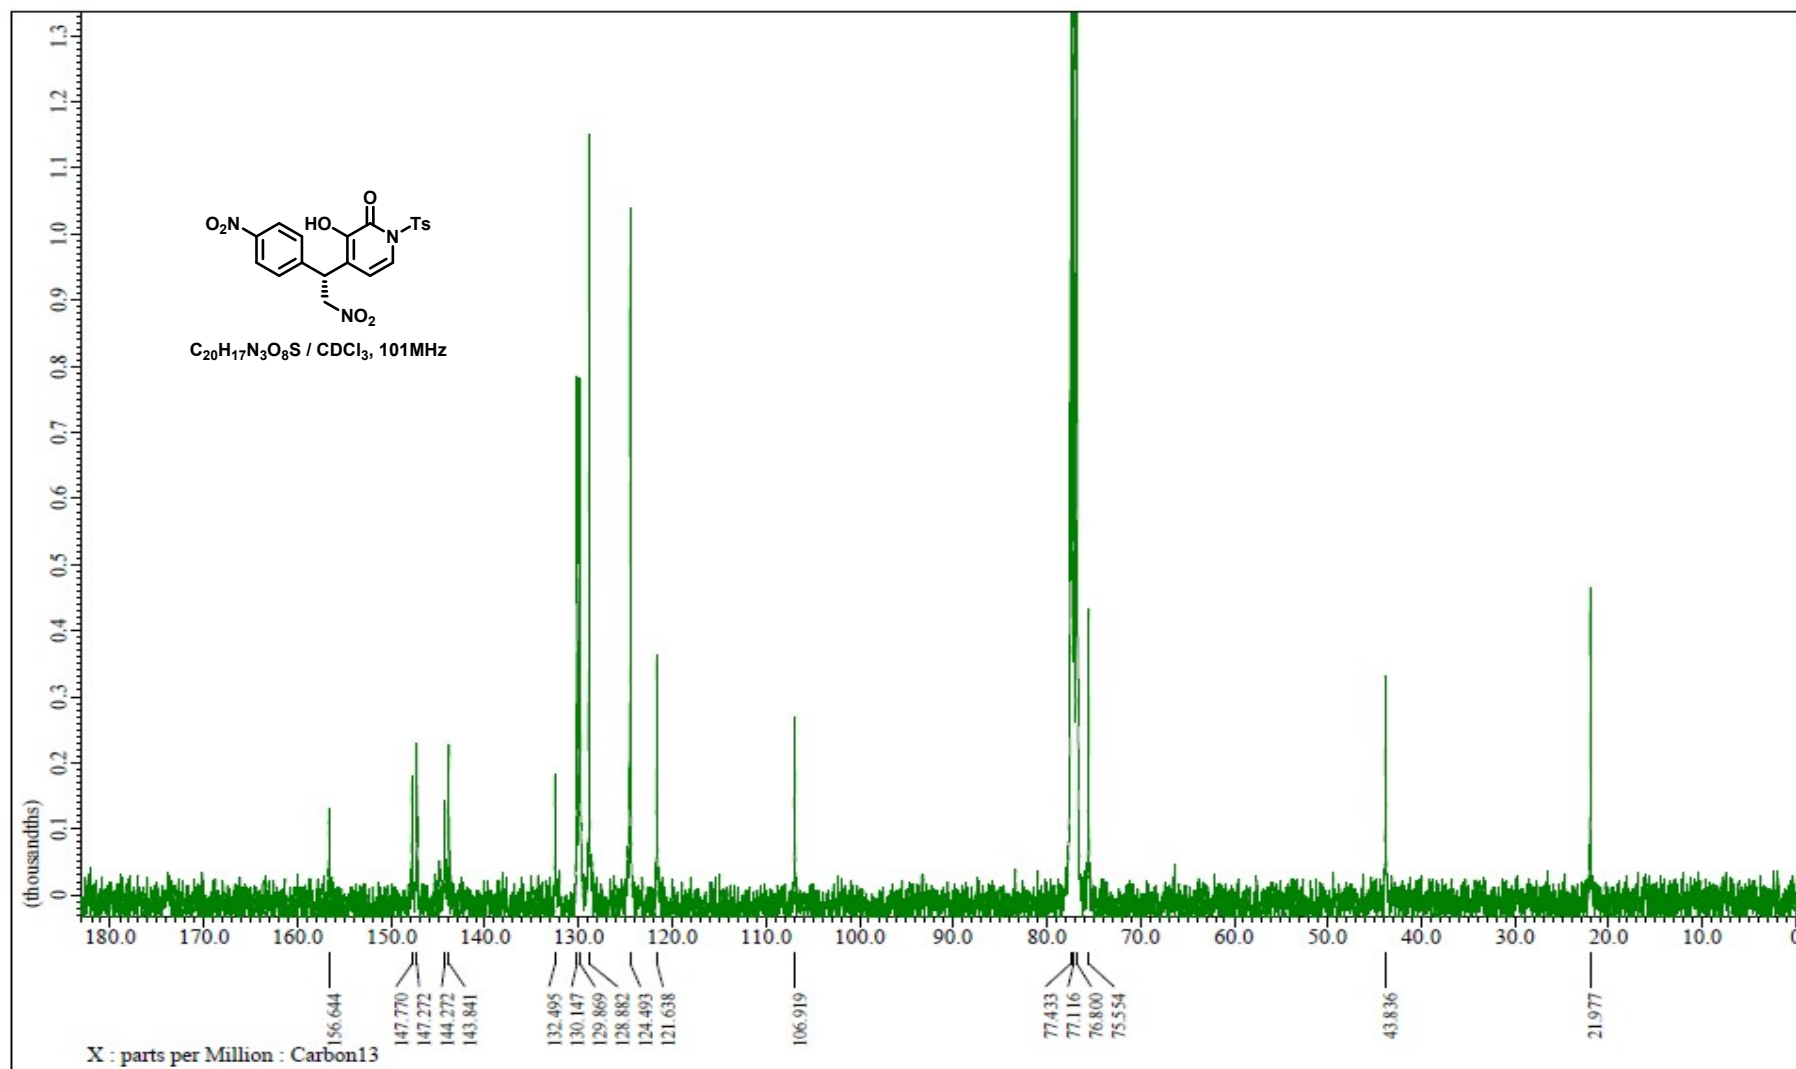



<sup>1</sup>H-NMR of compound (8k)

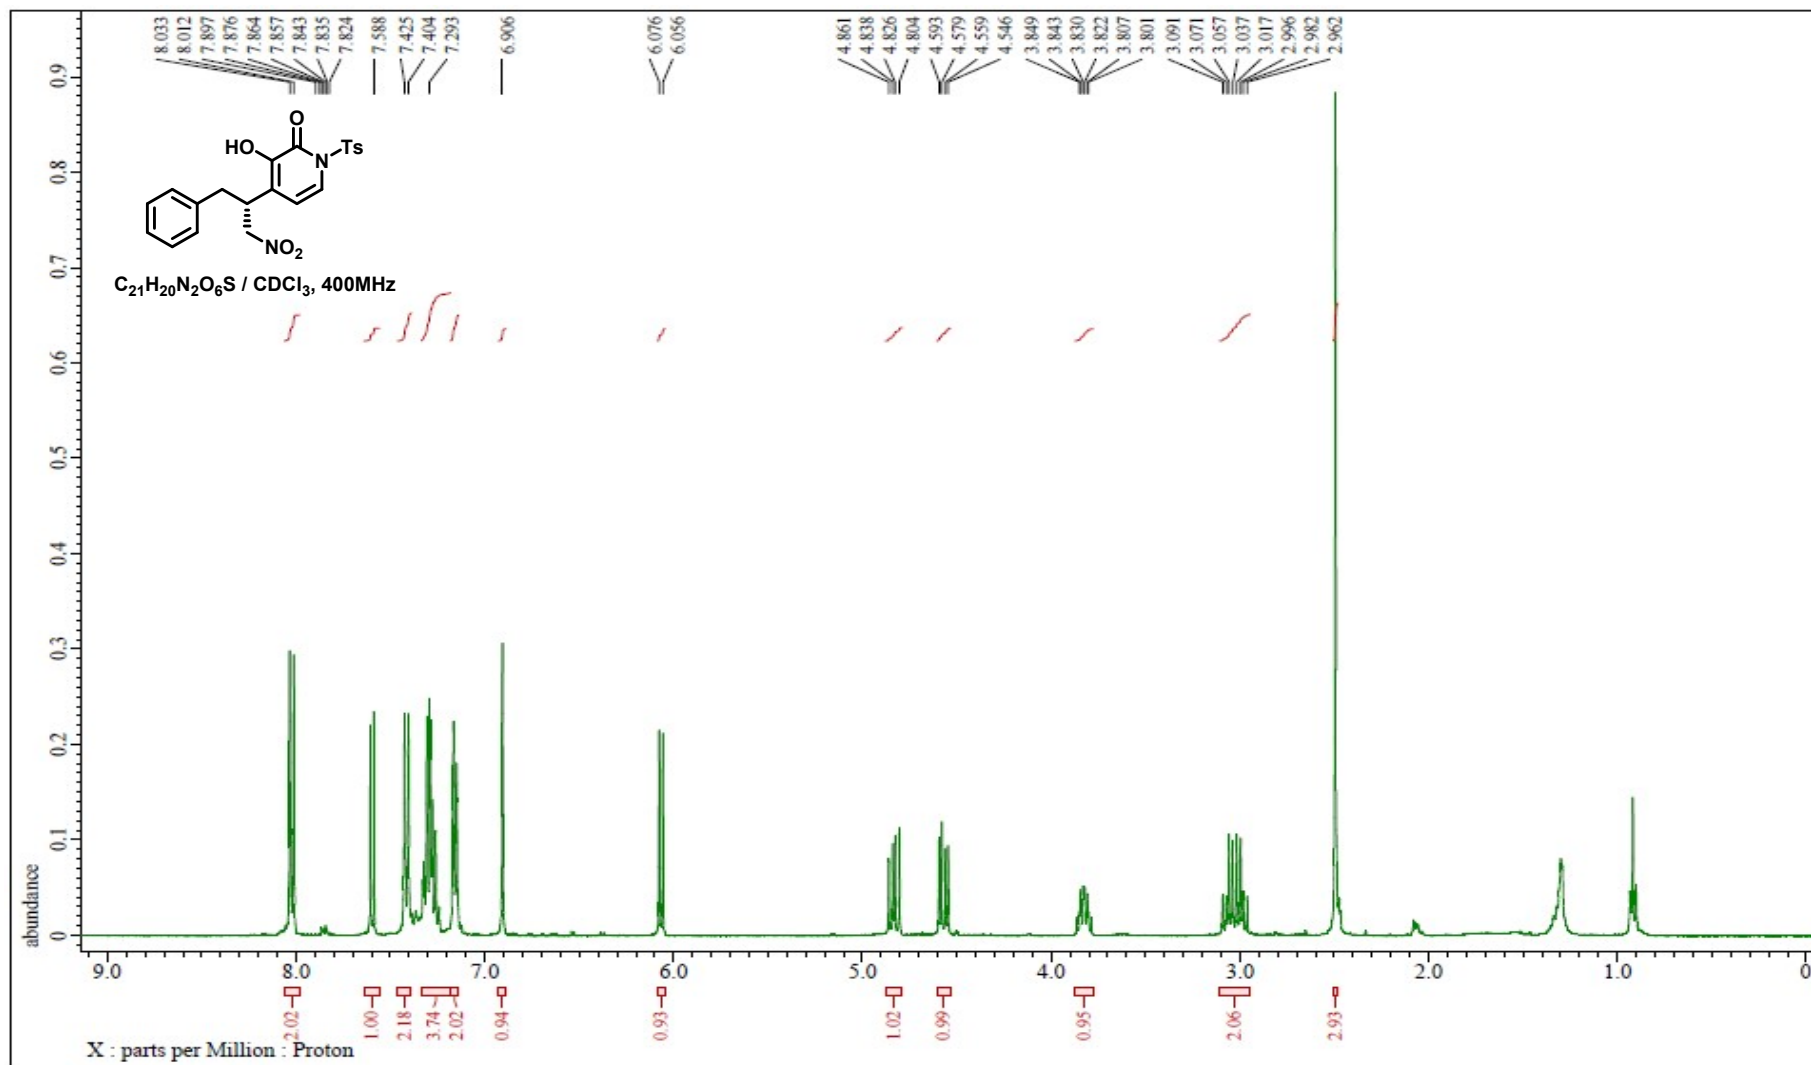

<sup>13</sup>C-NMR of compound (8k)

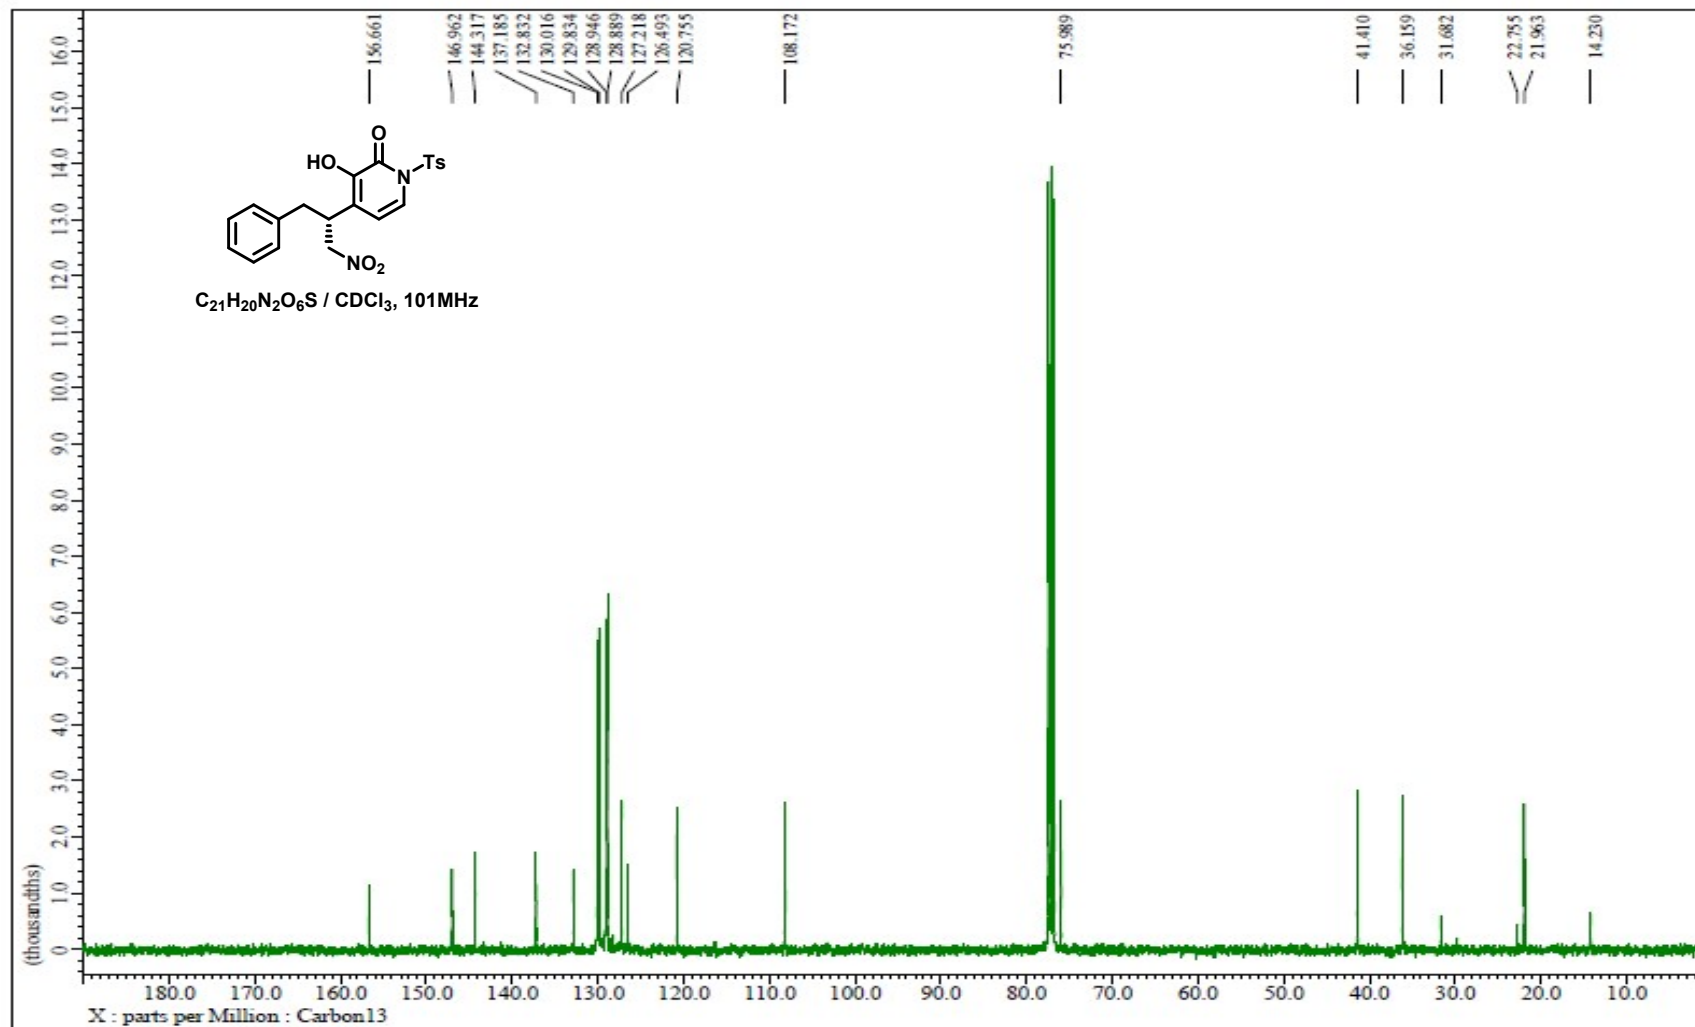

<sup>1</sup>H-NMR of compound (81)

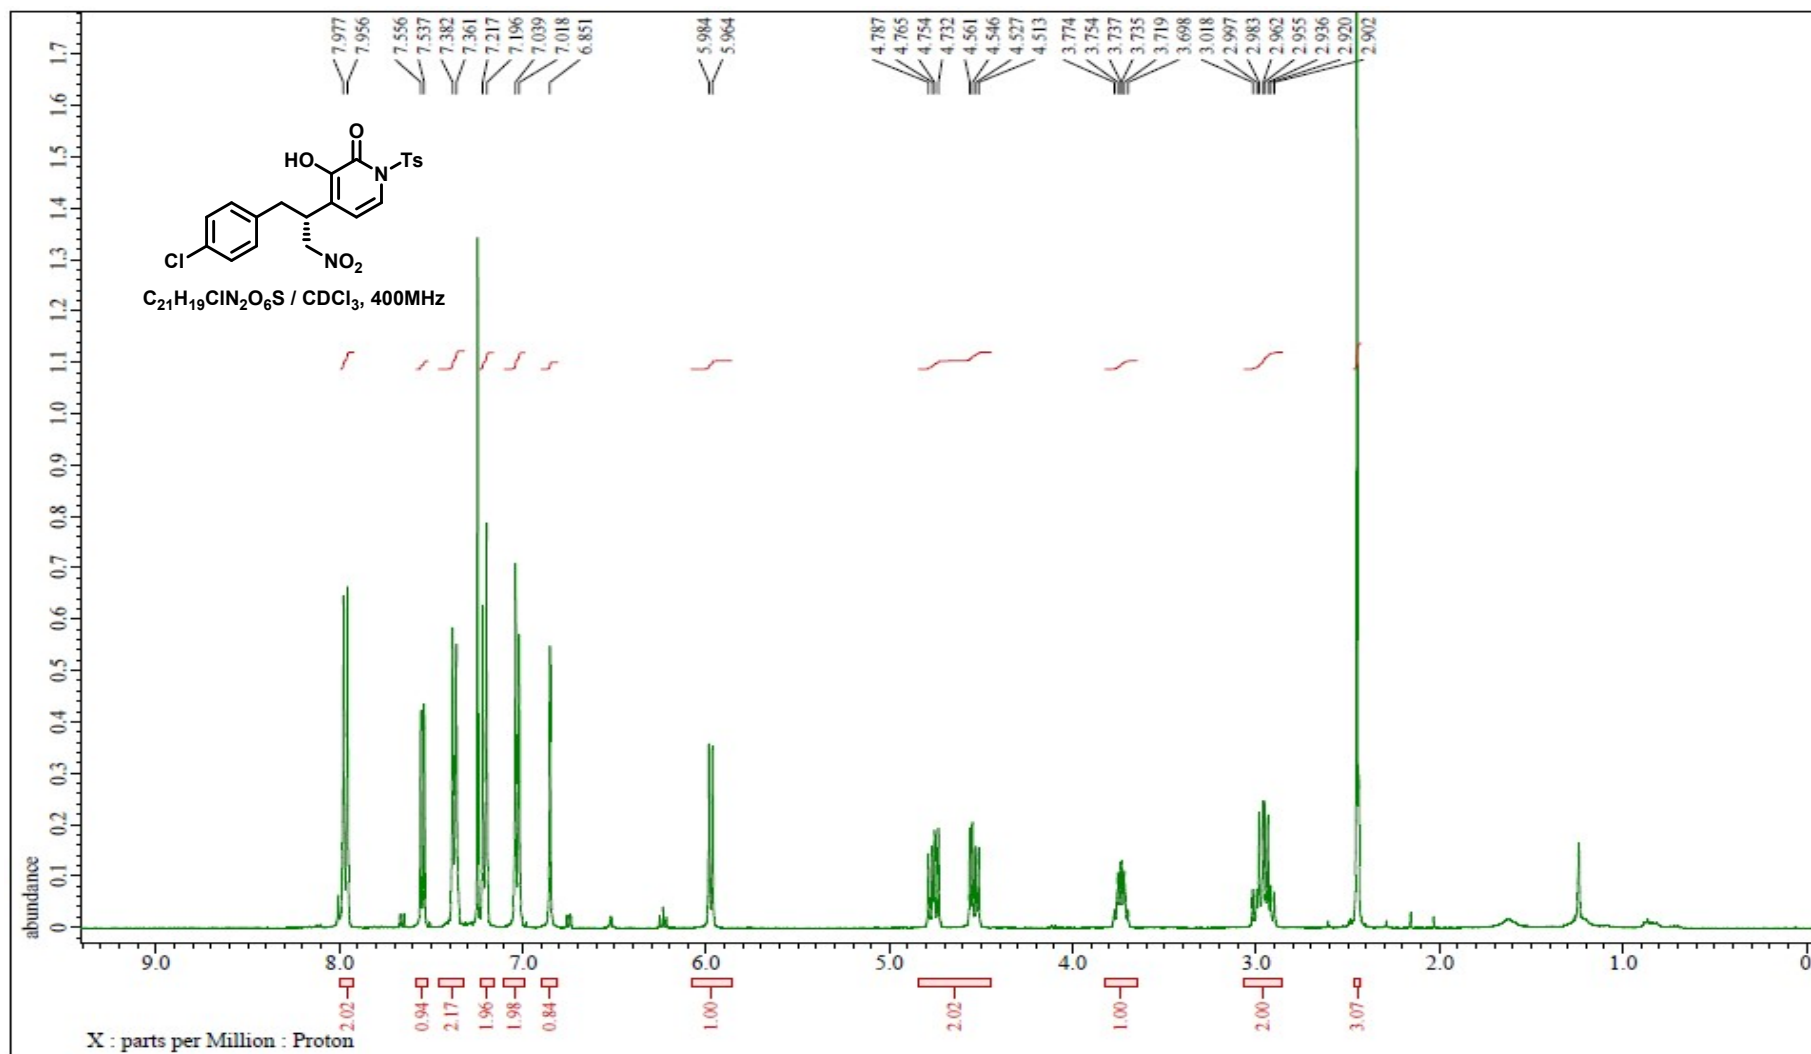

<sup>13</sup>C-NMR of compound (81)

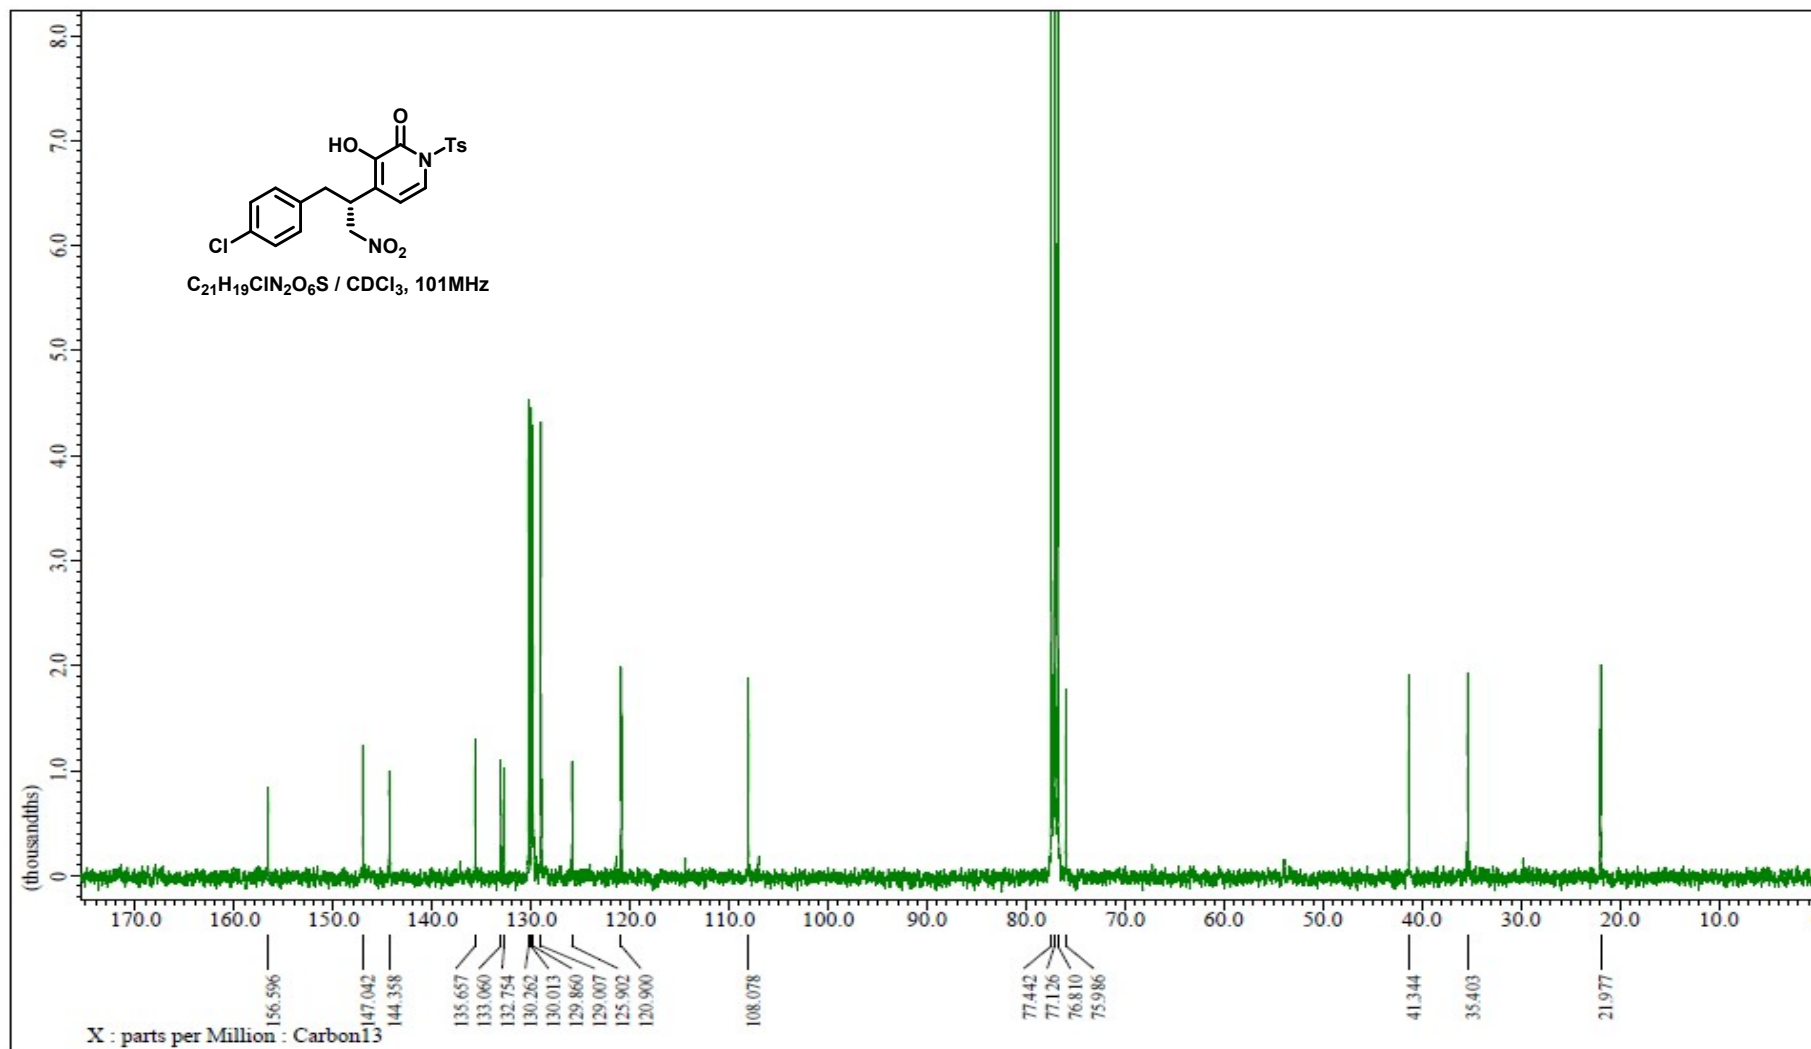

<sup>1</sup>H-NMR of compound (8m)

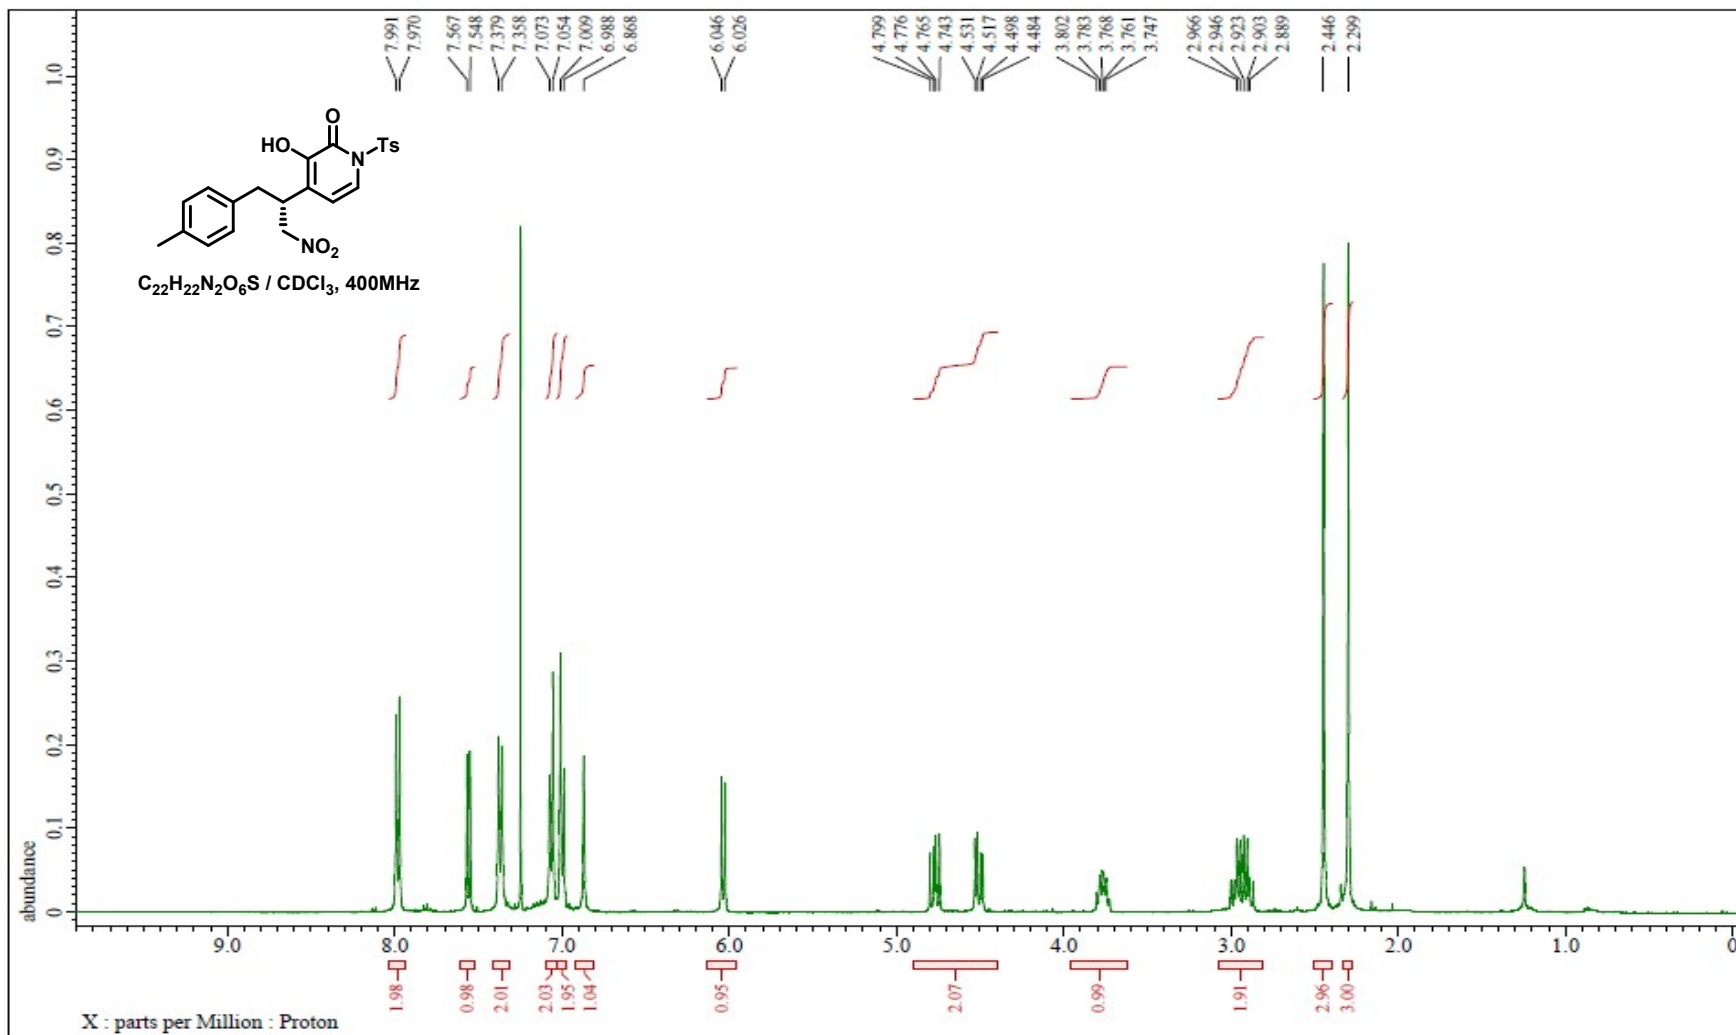

*<sup>13</sup>C -NMR of compound (8m)*

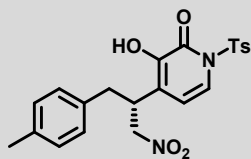

$C_{22}H_{22}N_2O_6S$  /  $CDCl_3$ , 101MHz

<sup>1</sup>H-NMR of compound (8n)

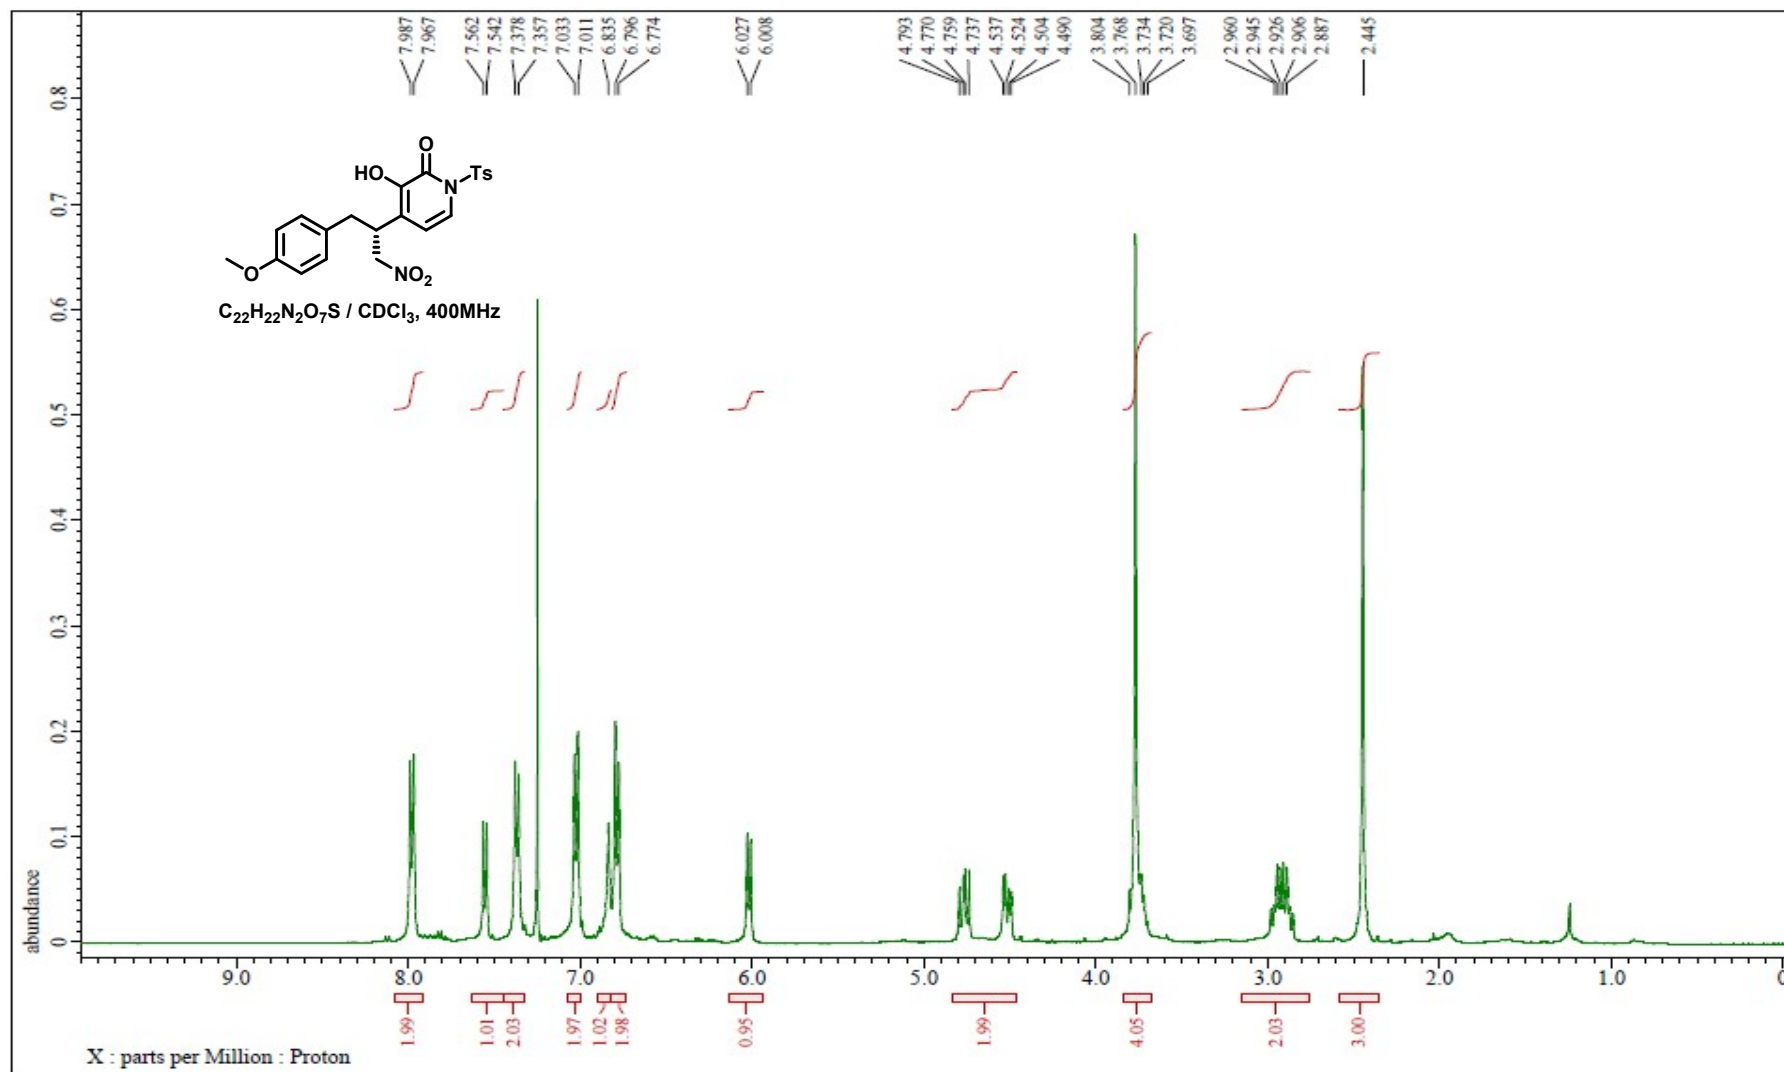

<sup>13</sup>C-NMR of compound (8n)

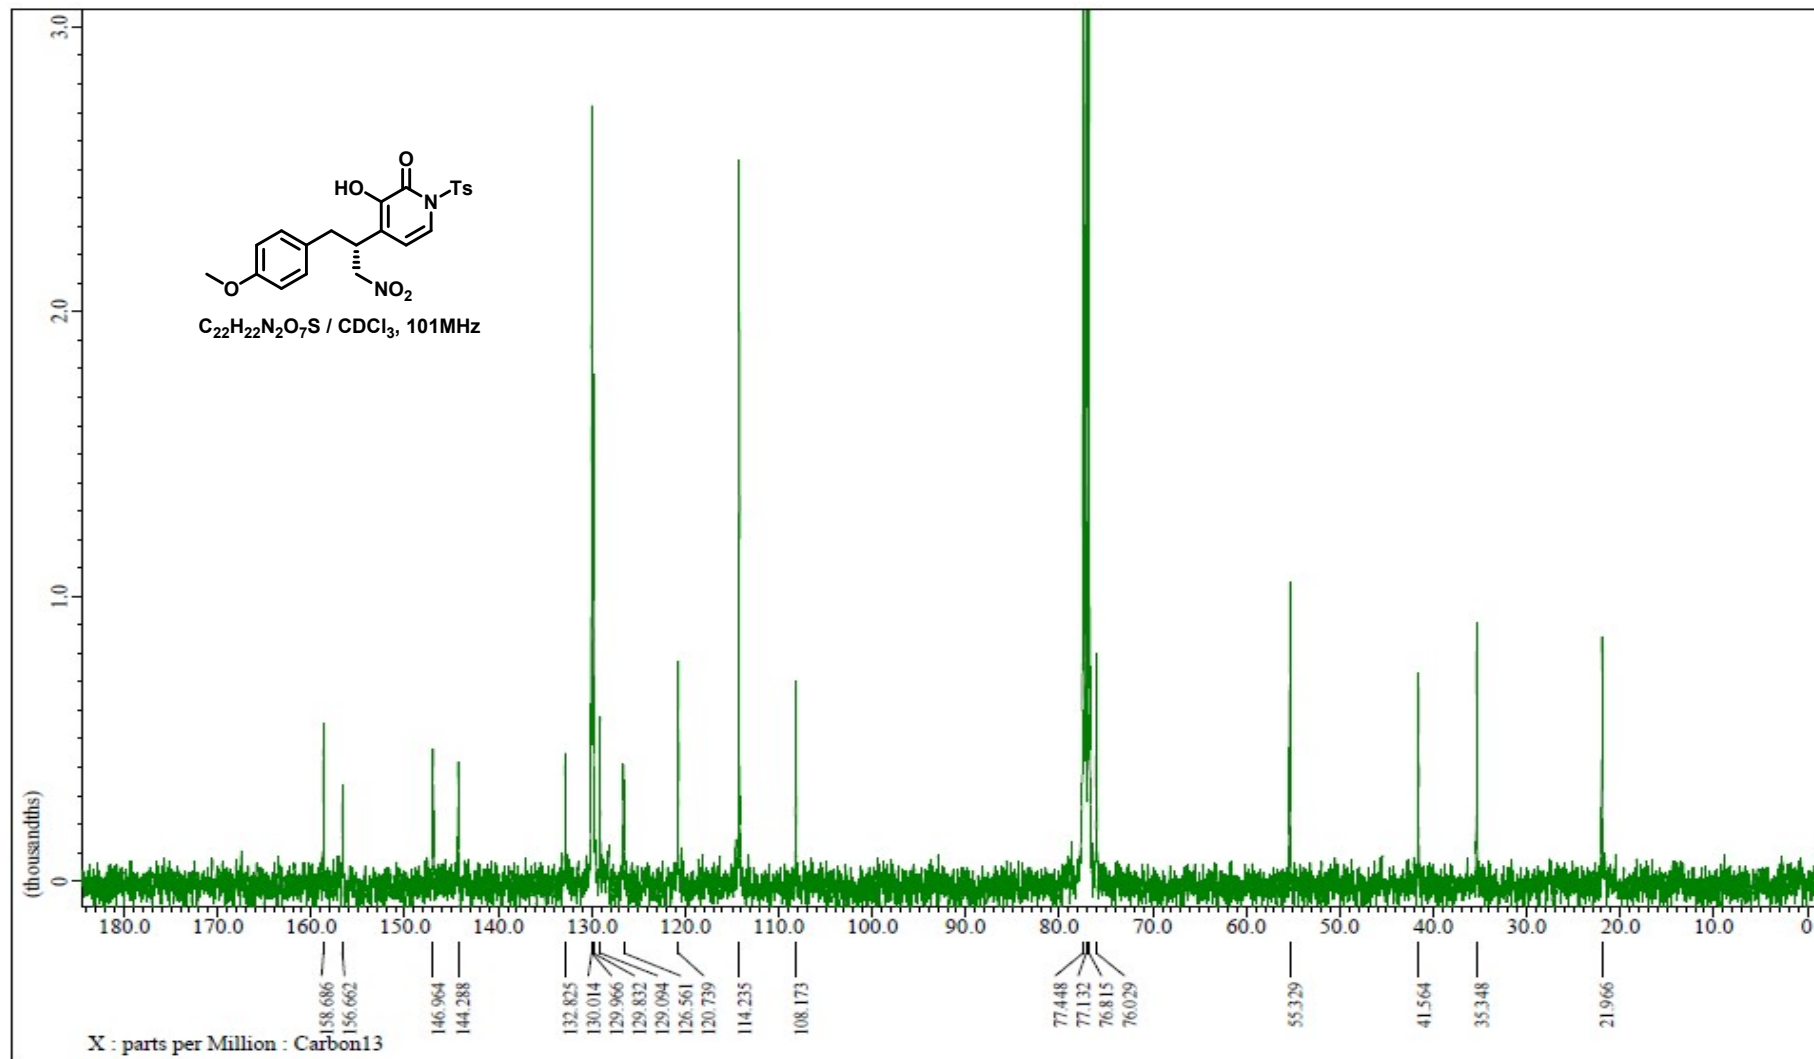



<sup>1</sup>H-NMR of compound (80)

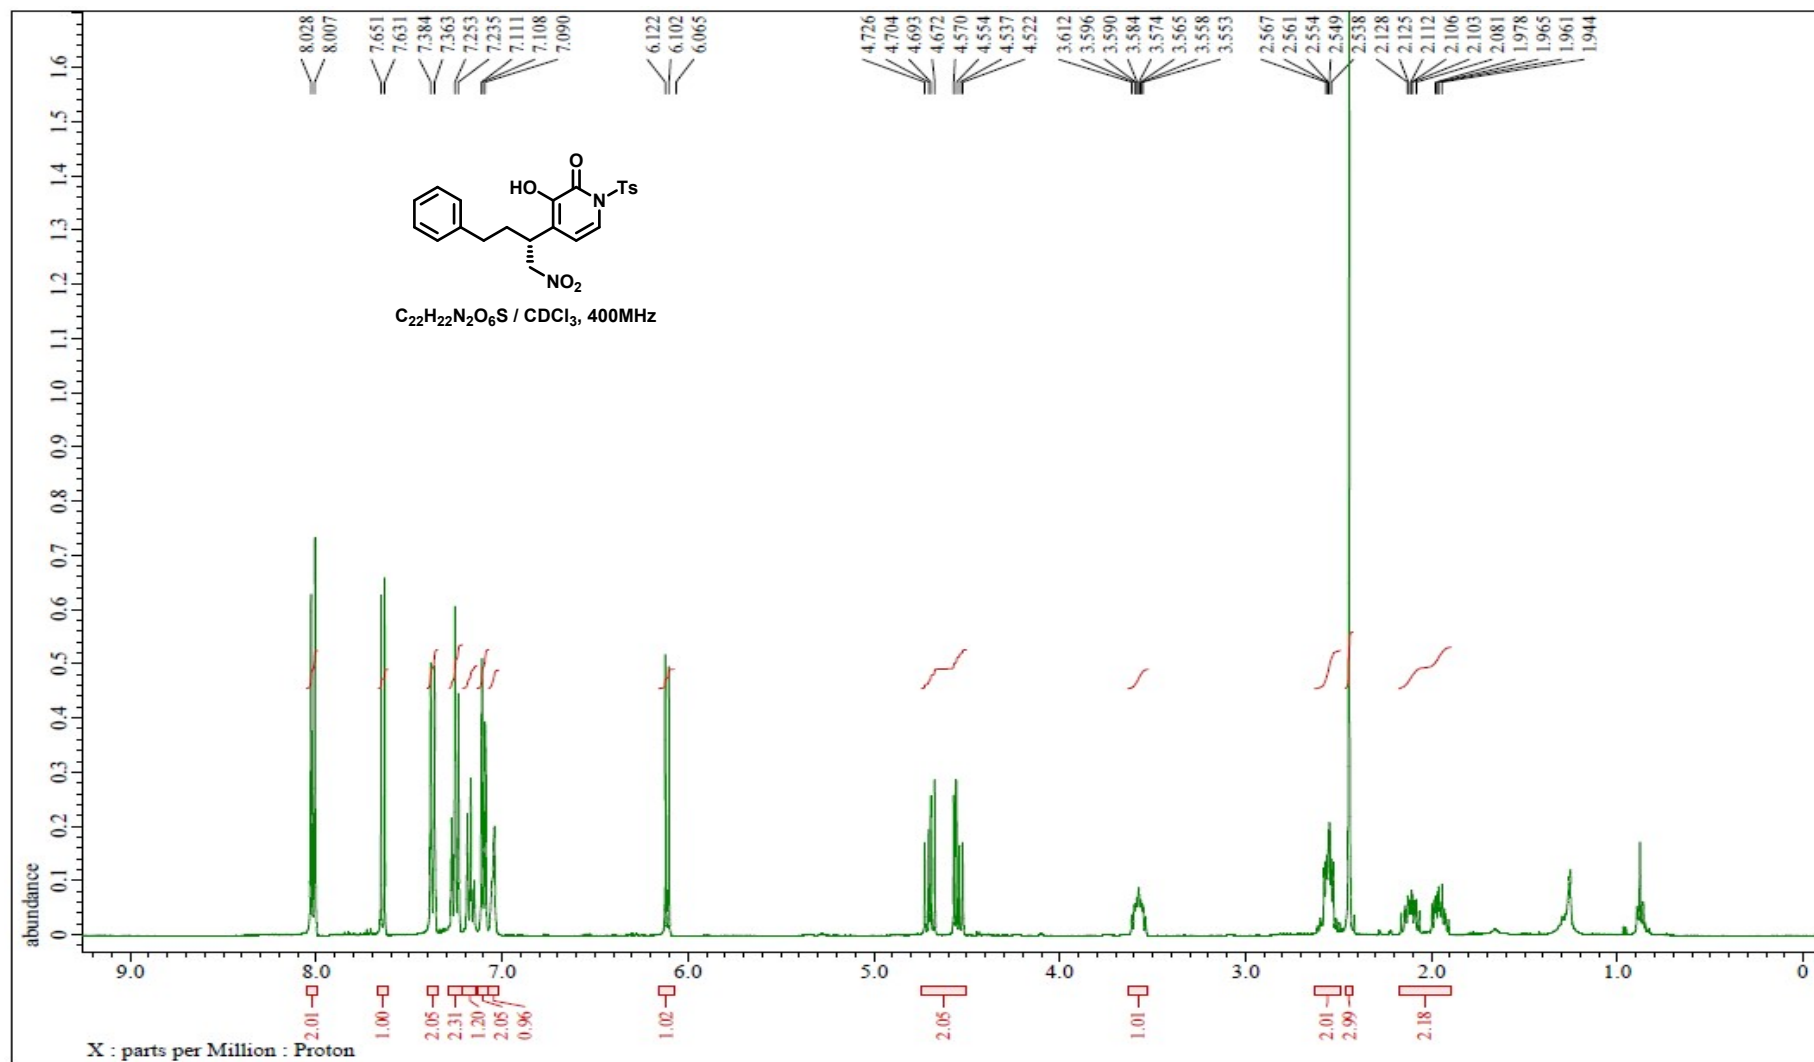

<sup>13</sup>C-NMR of compound (8o)

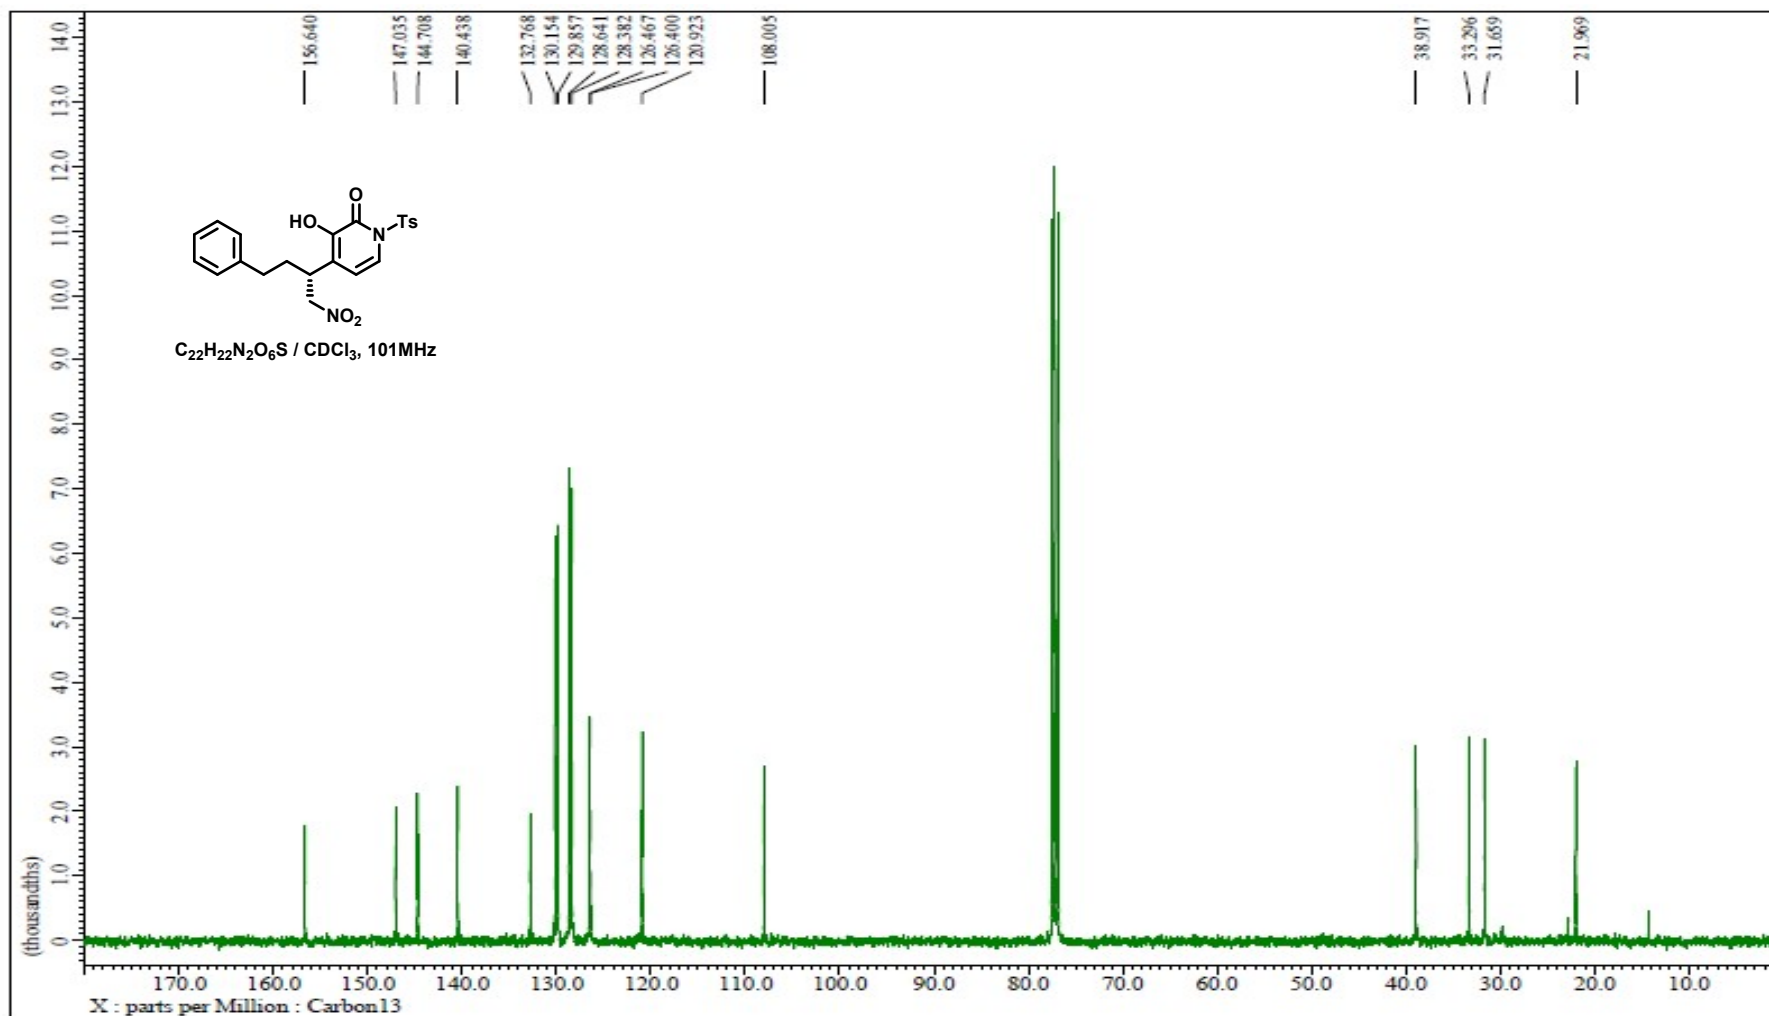

<sup>1</sup>H-NMR of compound (8p)

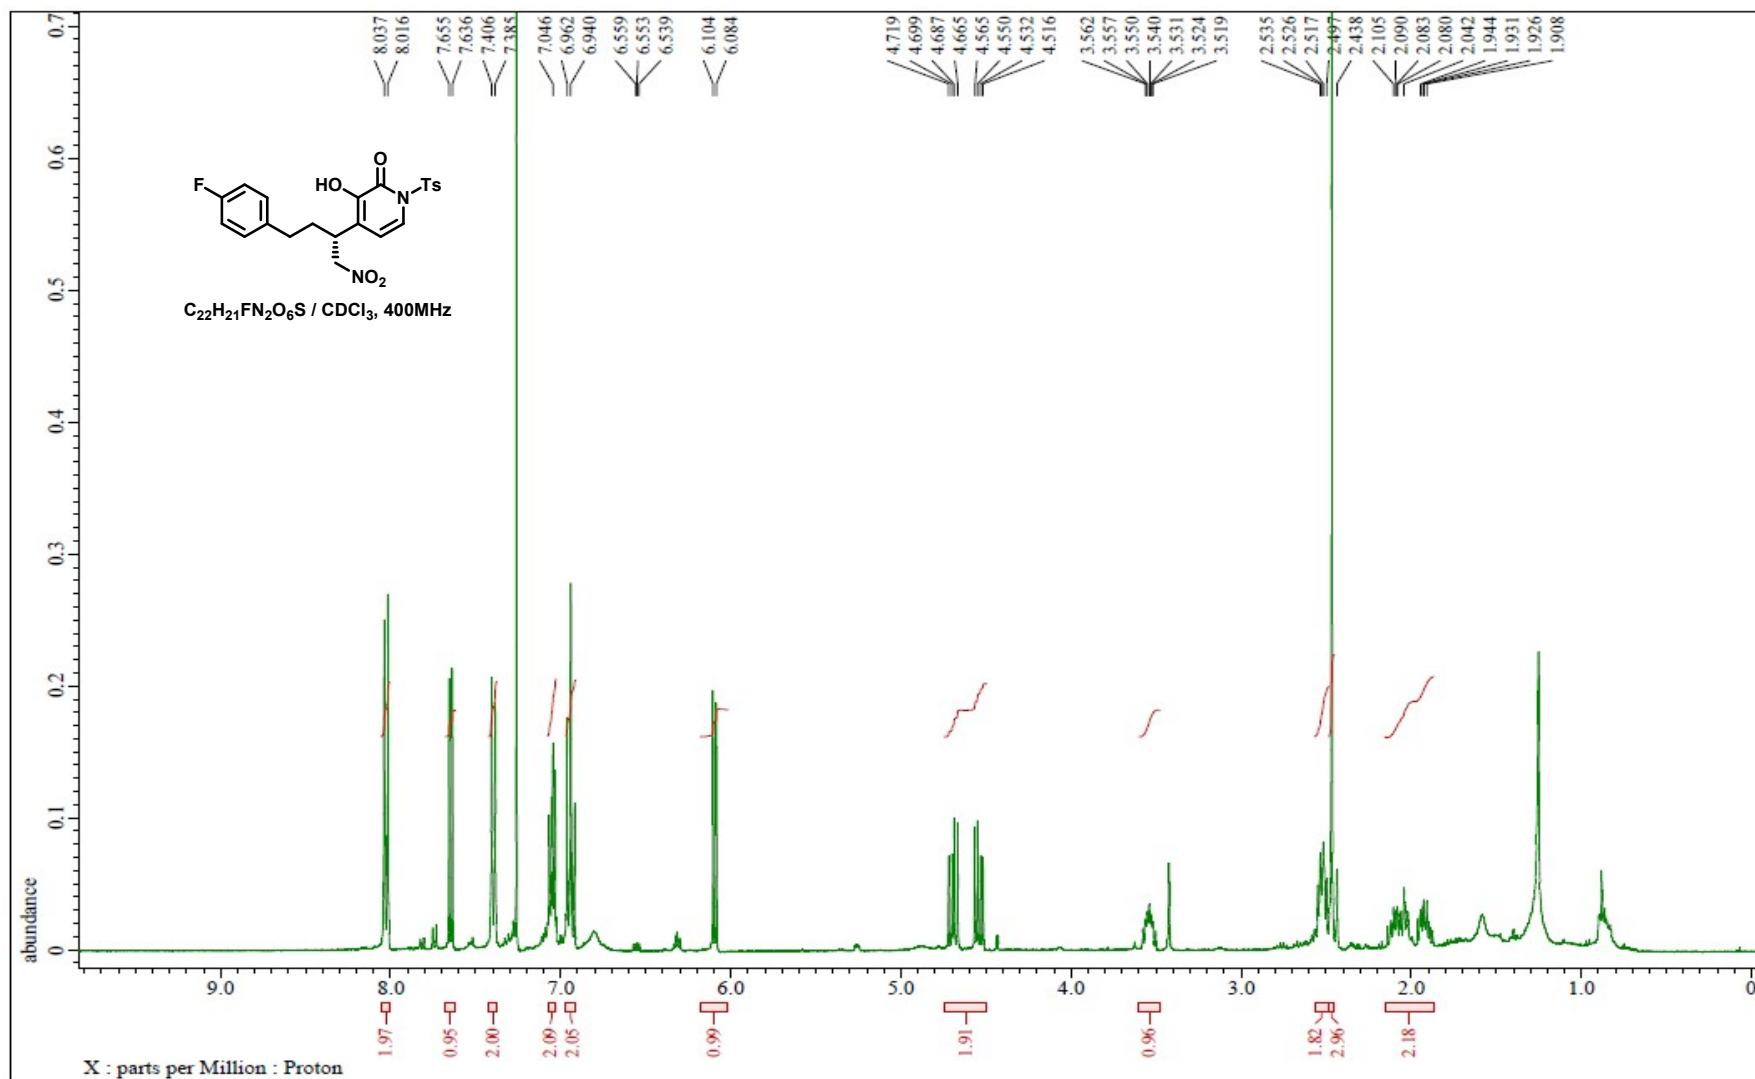

$^{13}\text{C}$  -NMR of compound (8p)

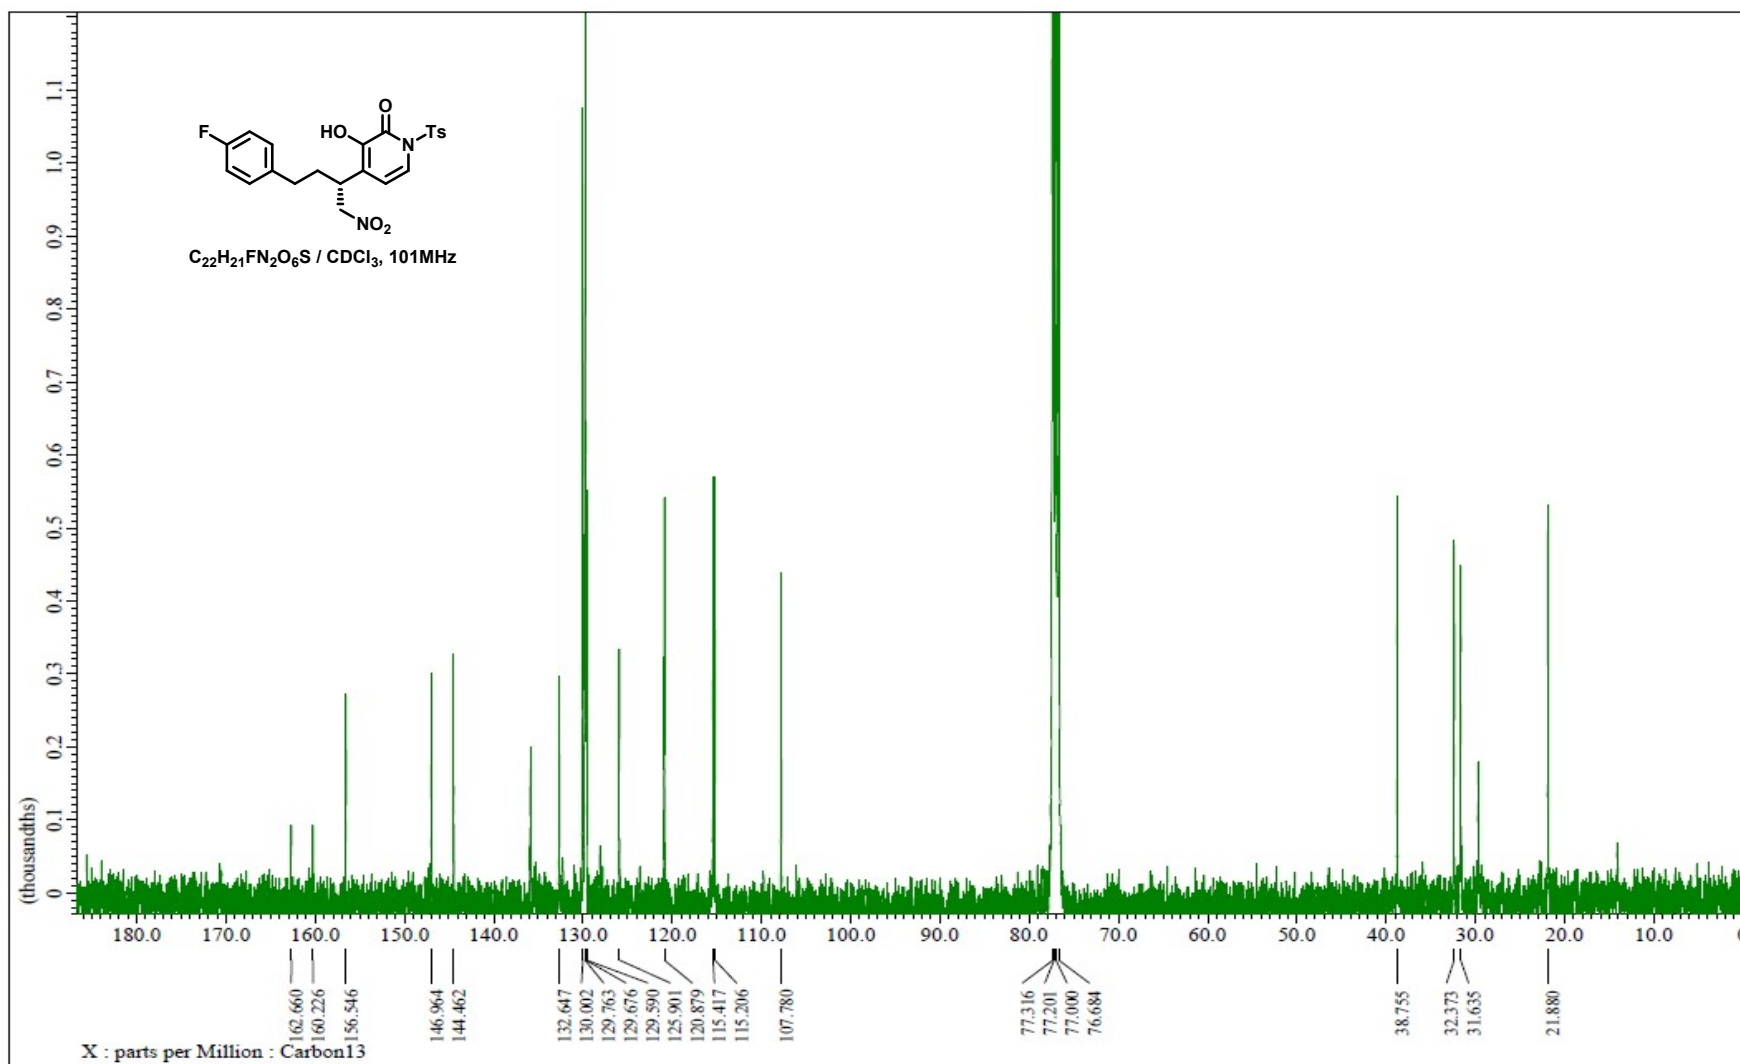

<sup>1</sup>H-NMR of compound (8q)

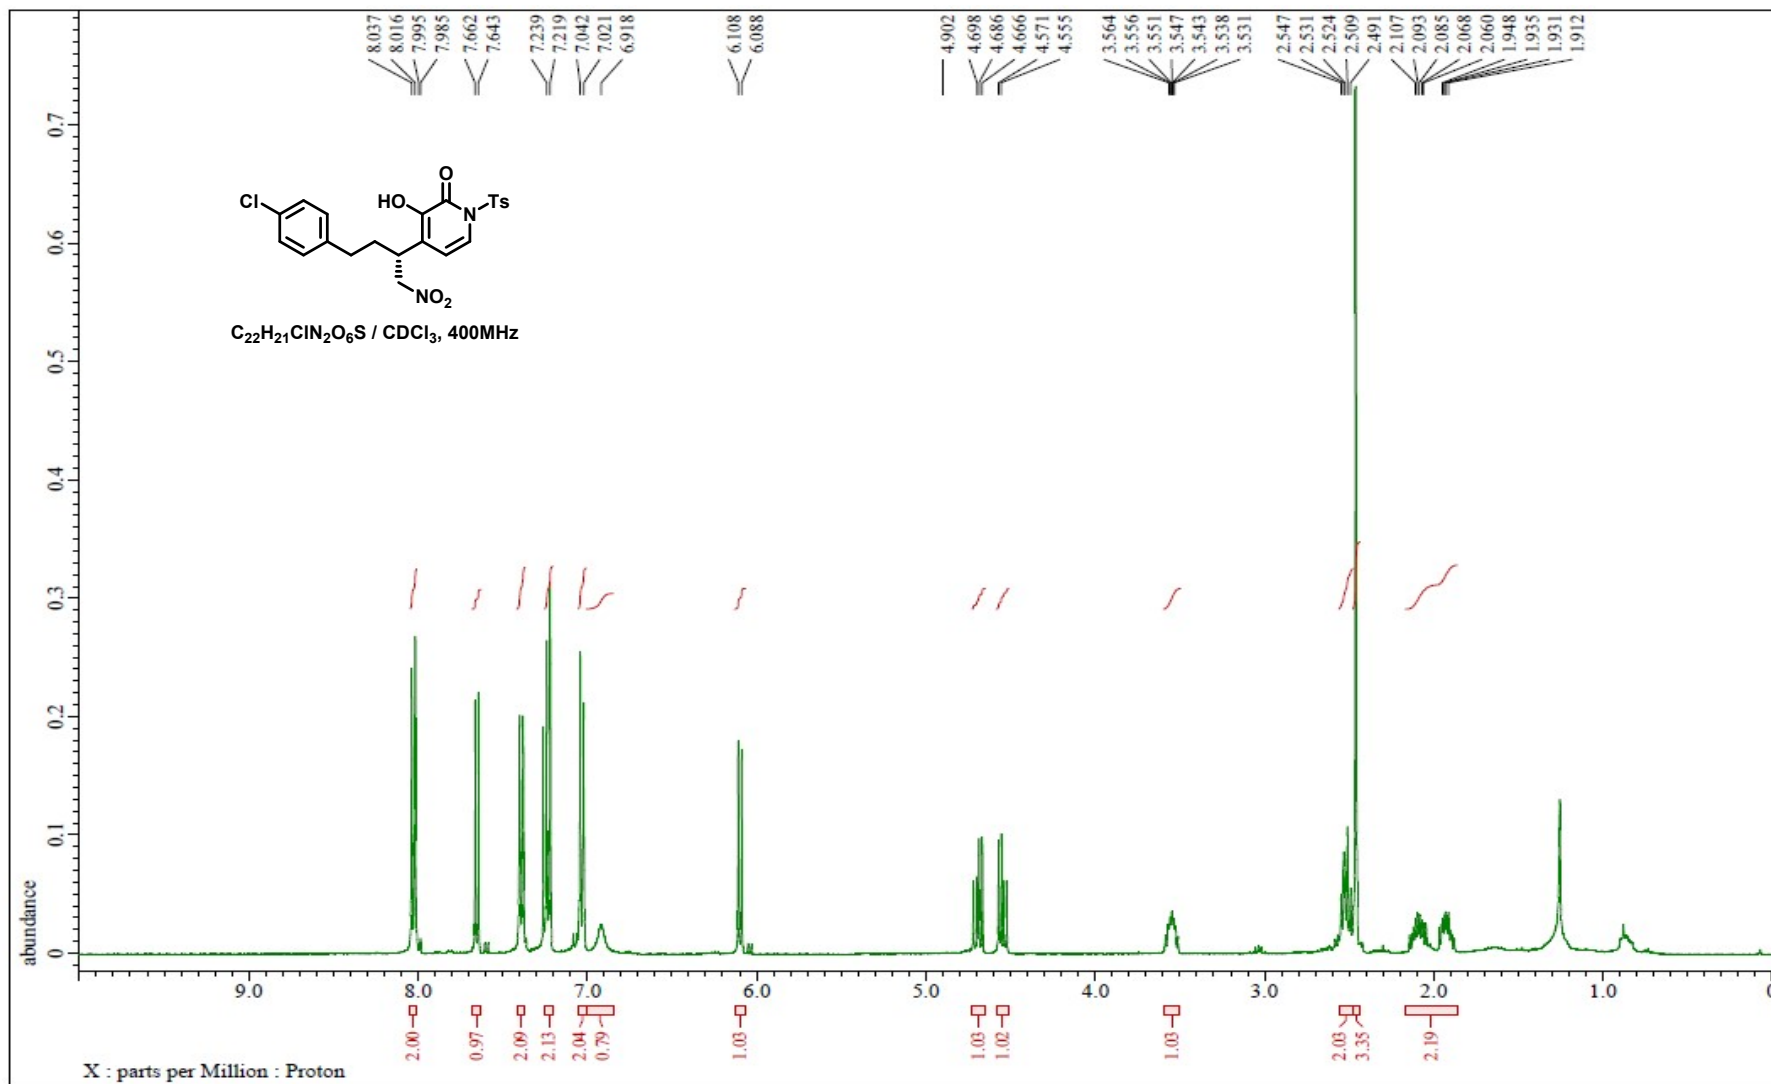

<sup>13</sup>C-NMR of compound (8q)

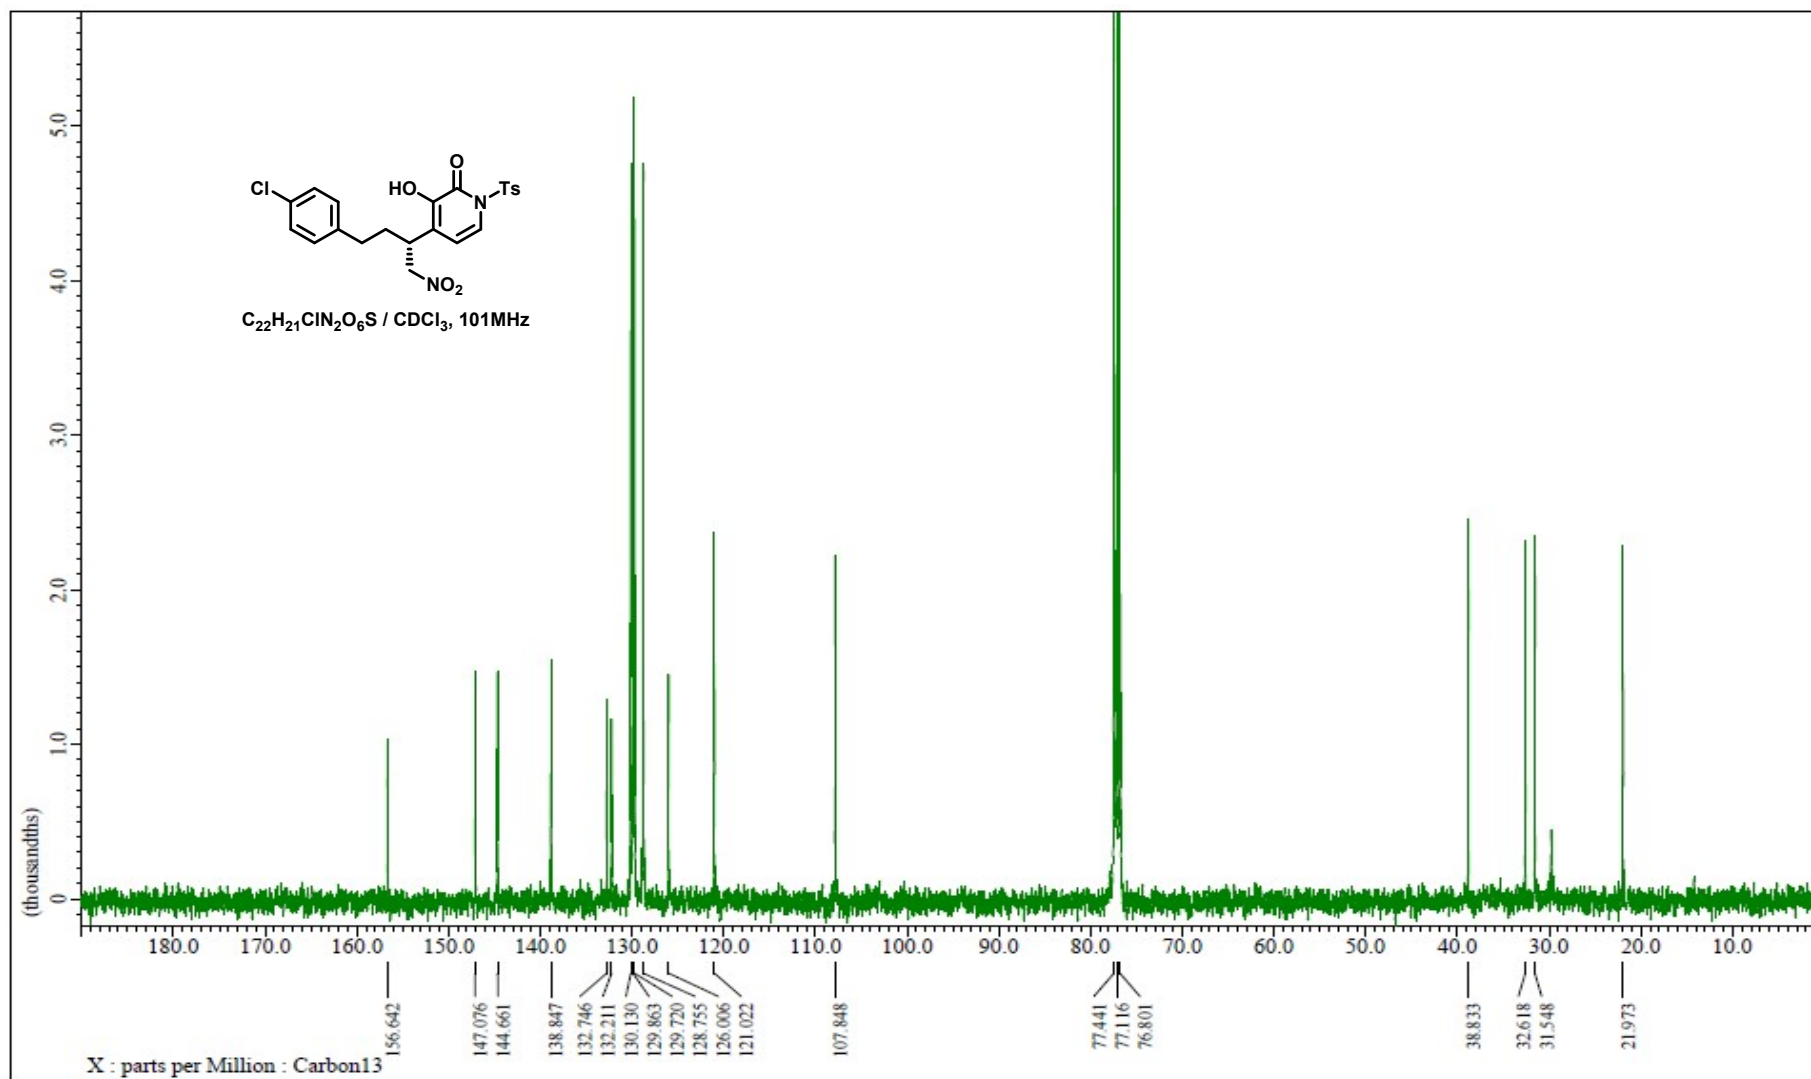

<sup>1</sup>H-NMR of compound (8r)

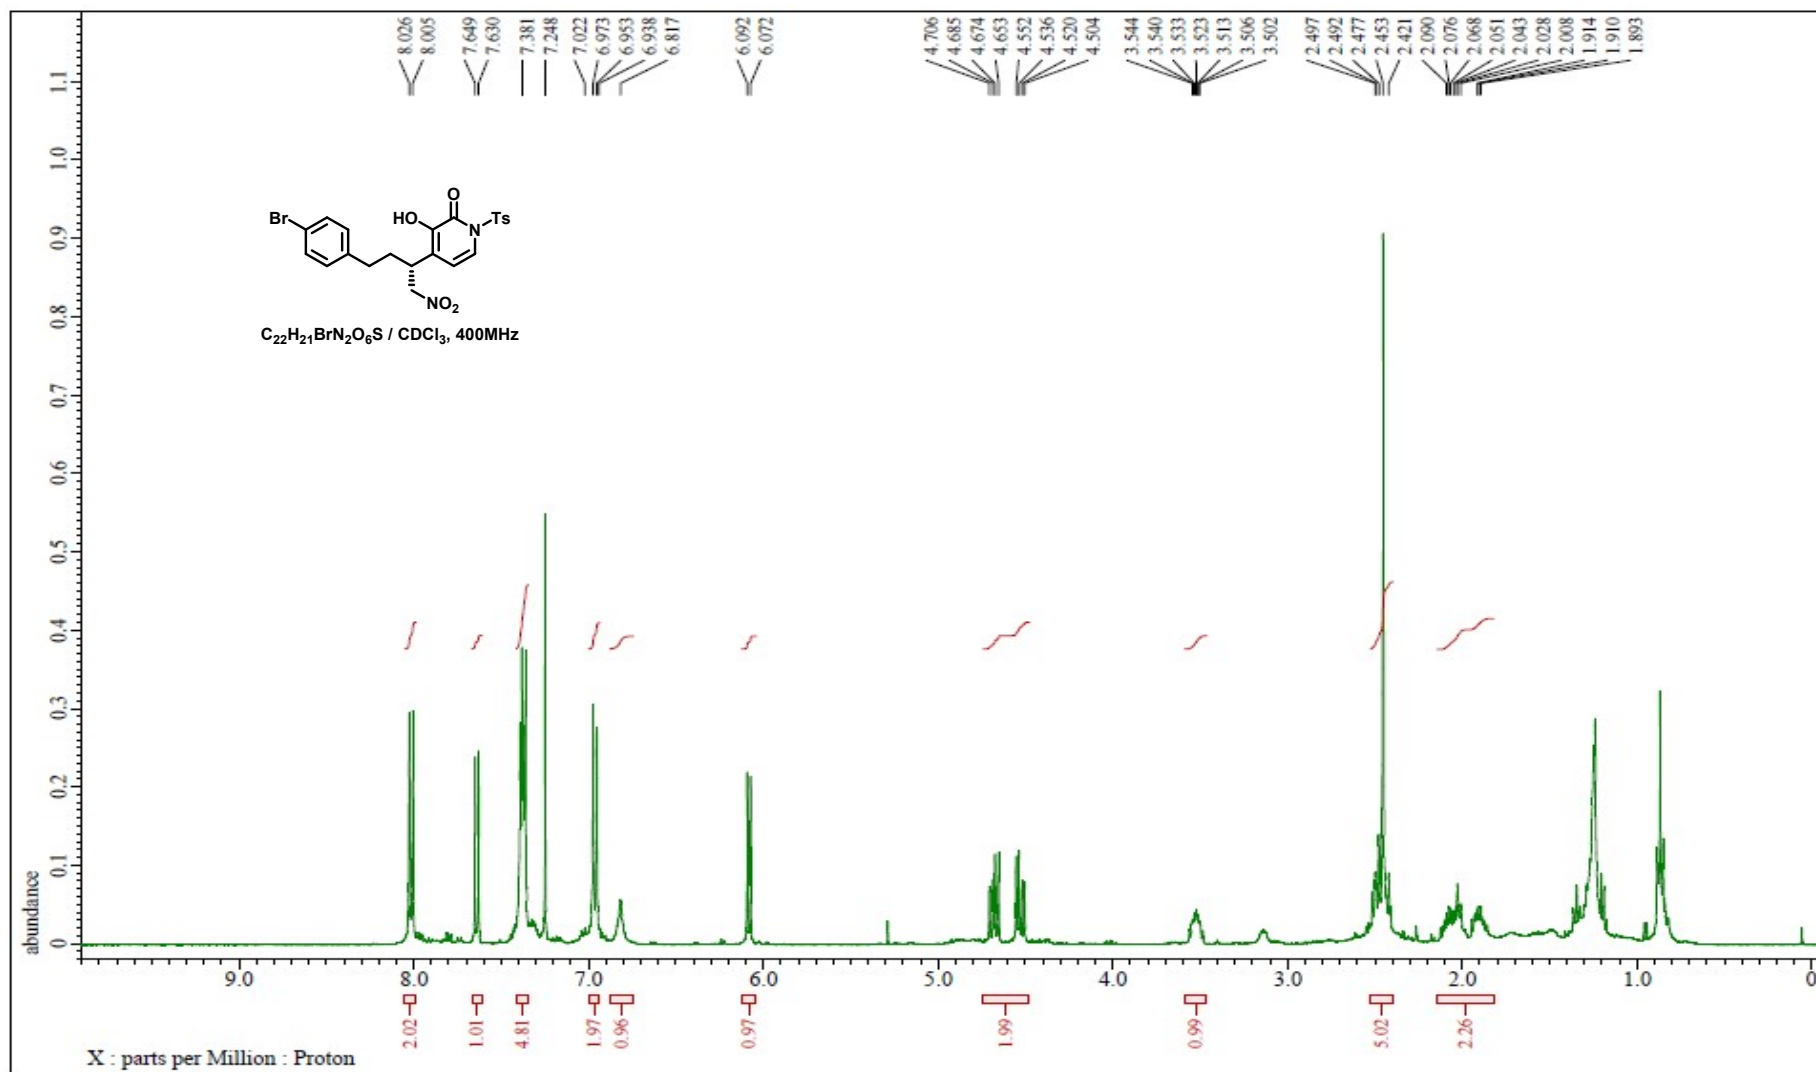

<sup>13</sup>C-NMR of compound (8r)

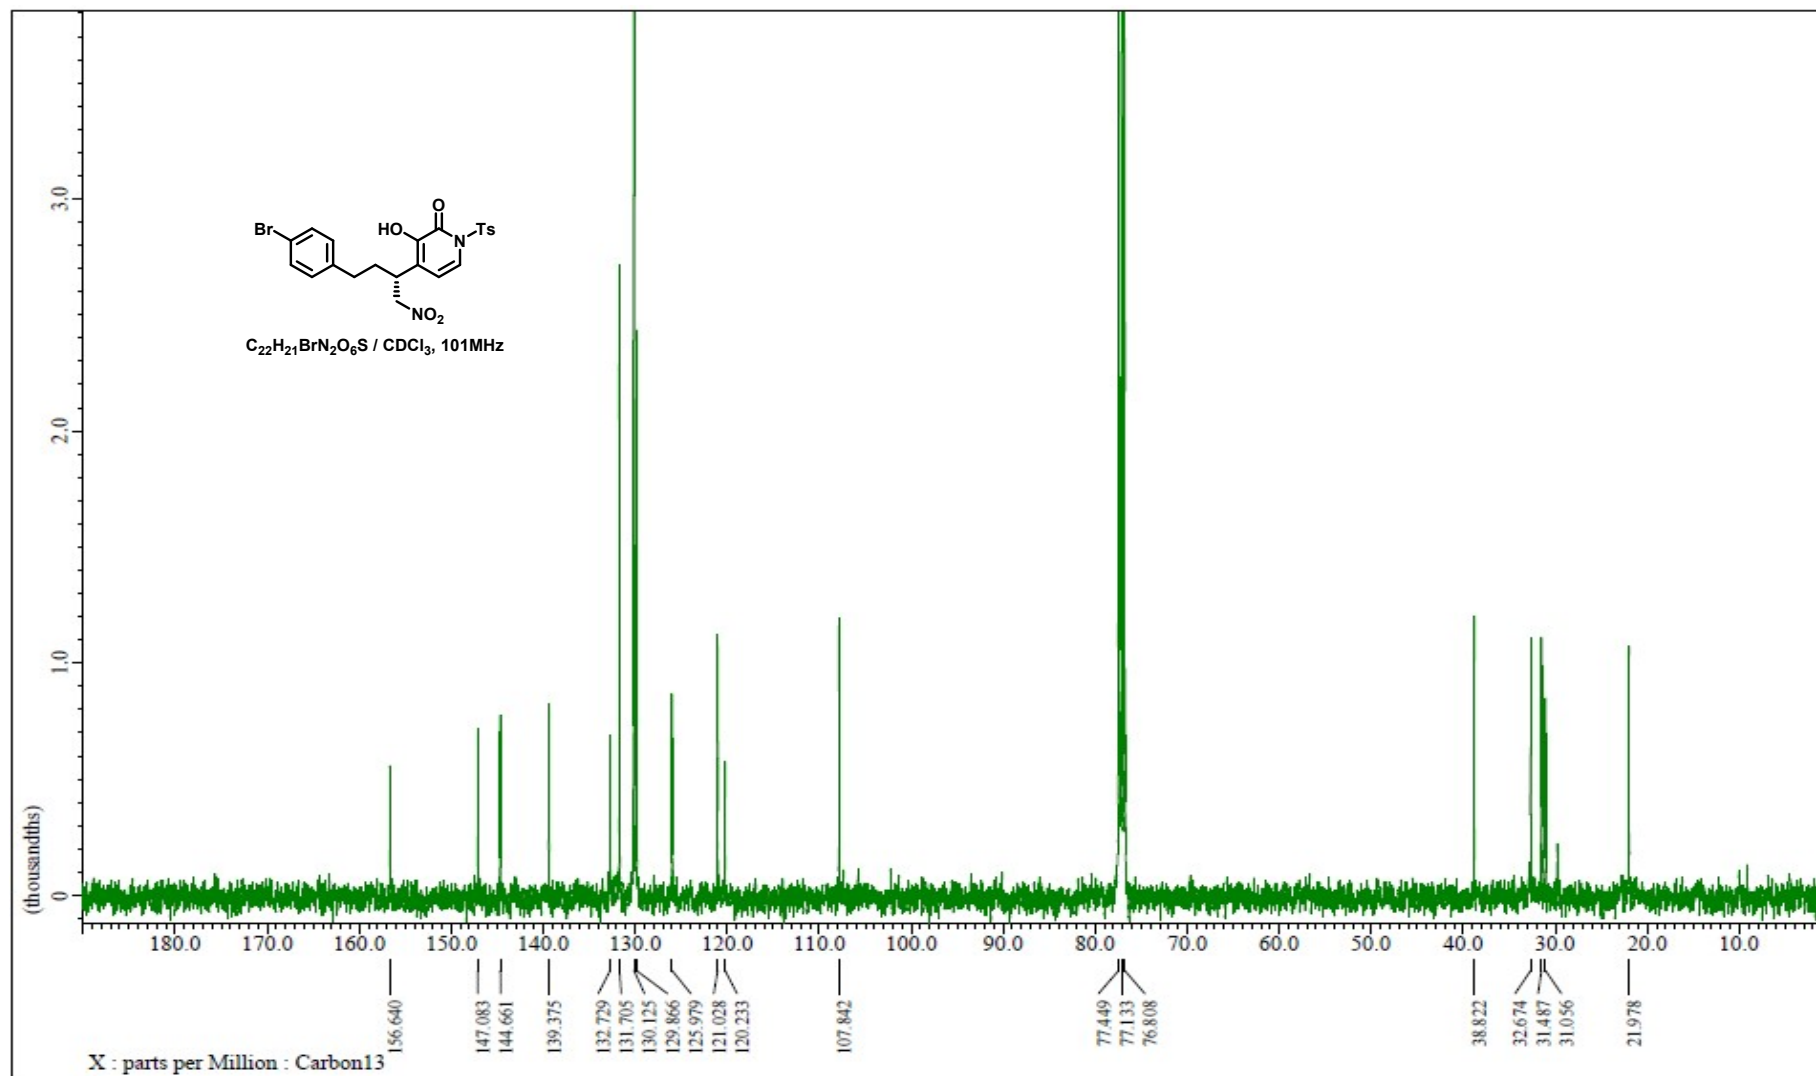



<sup>1</sup>H-NMR of compound (8s)

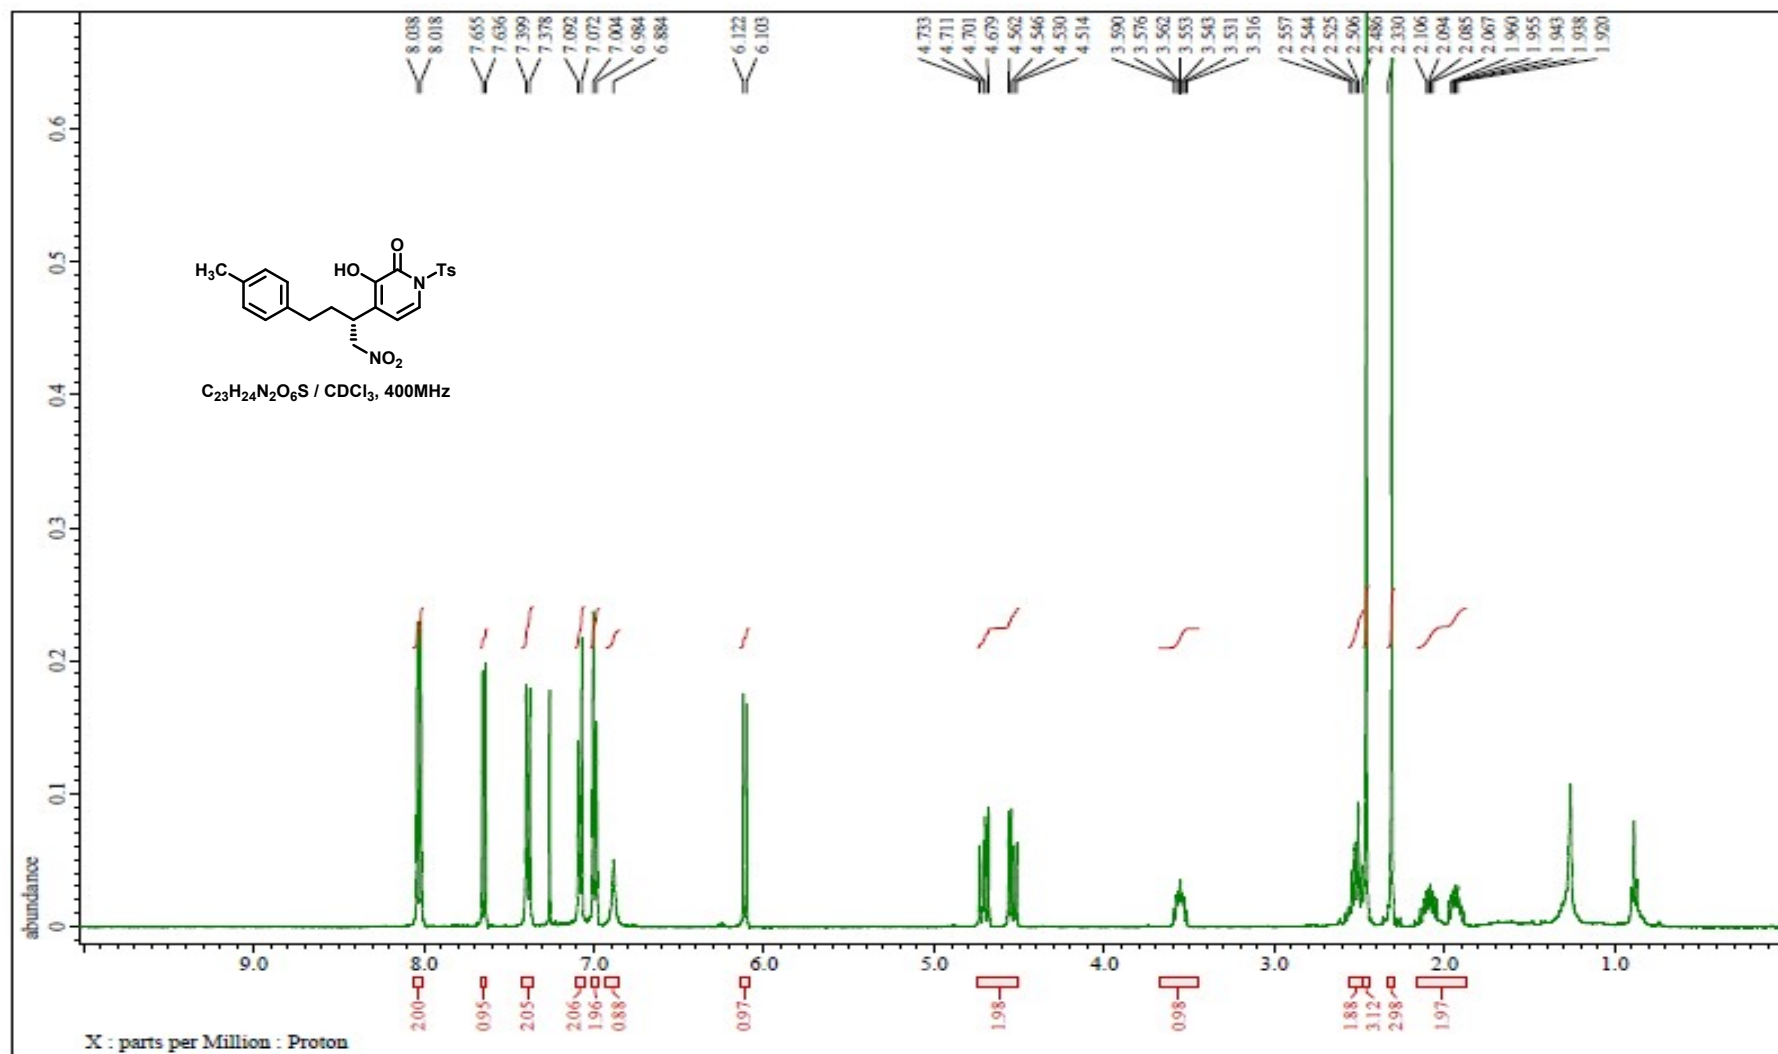

$^{13}\text{C}$  -NMR of compound (8s)

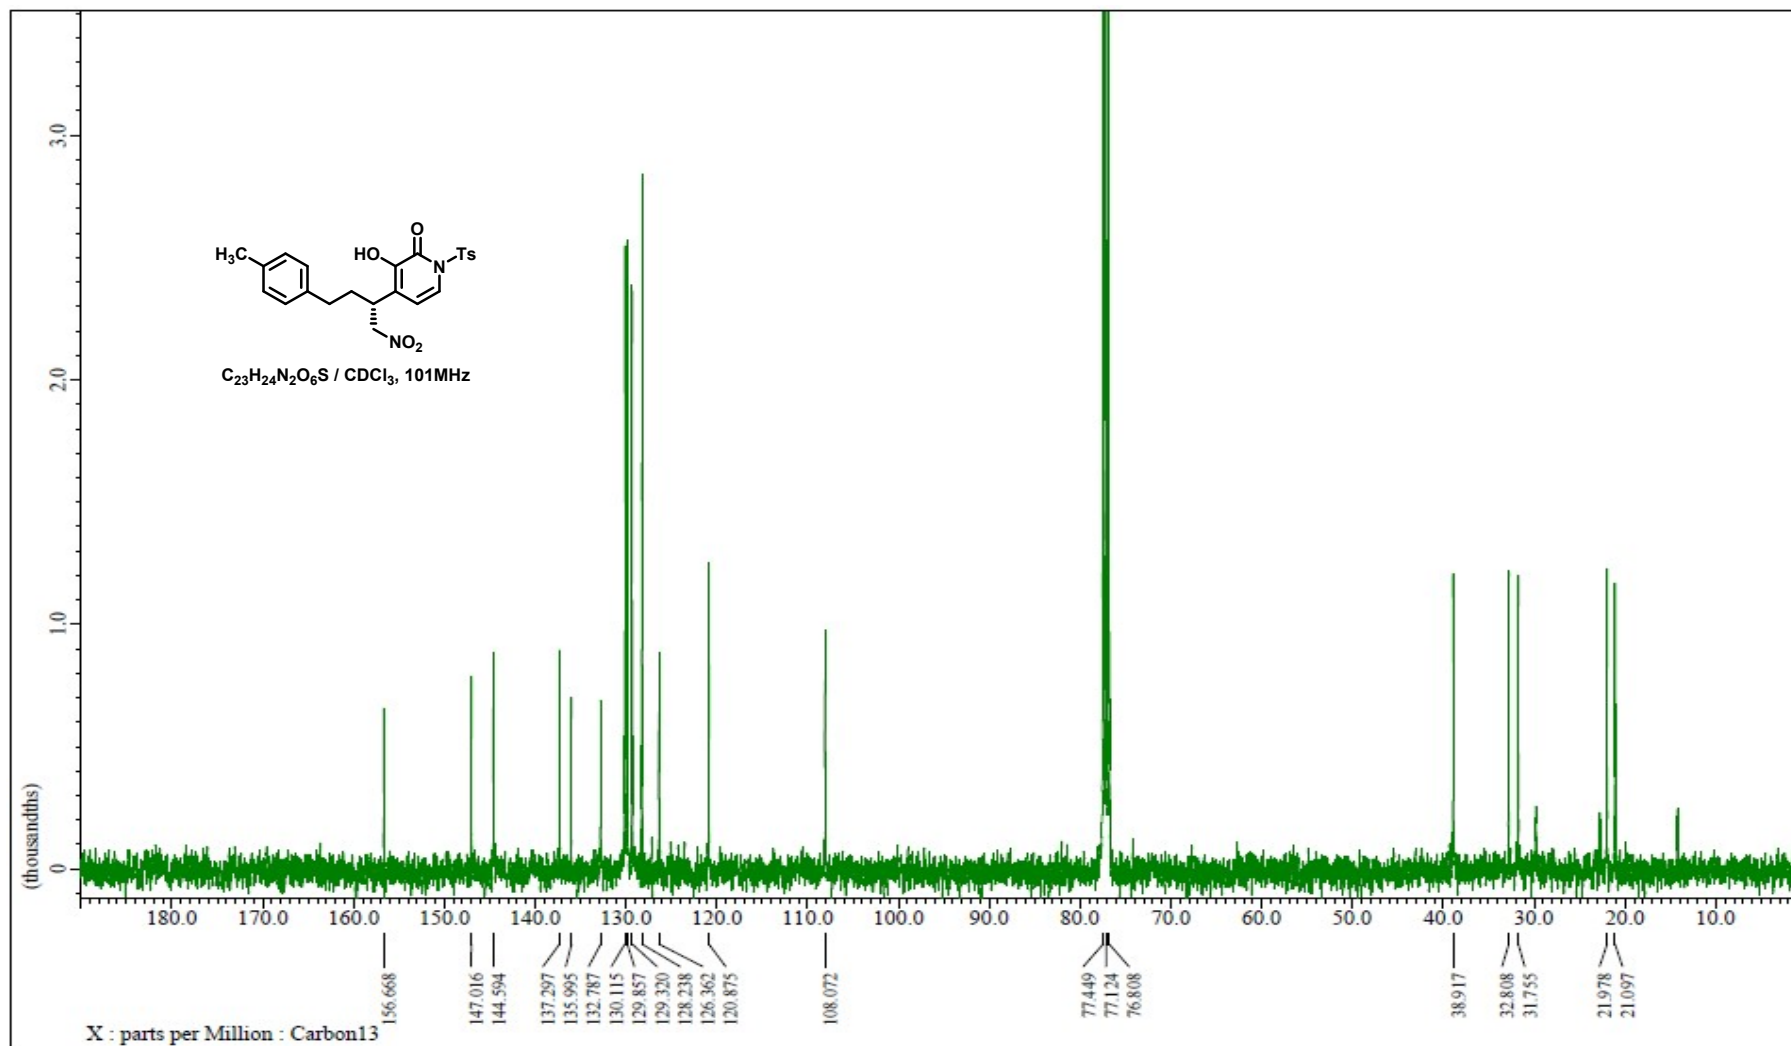

<sup>1</sup>H-NMR of compound (8t)

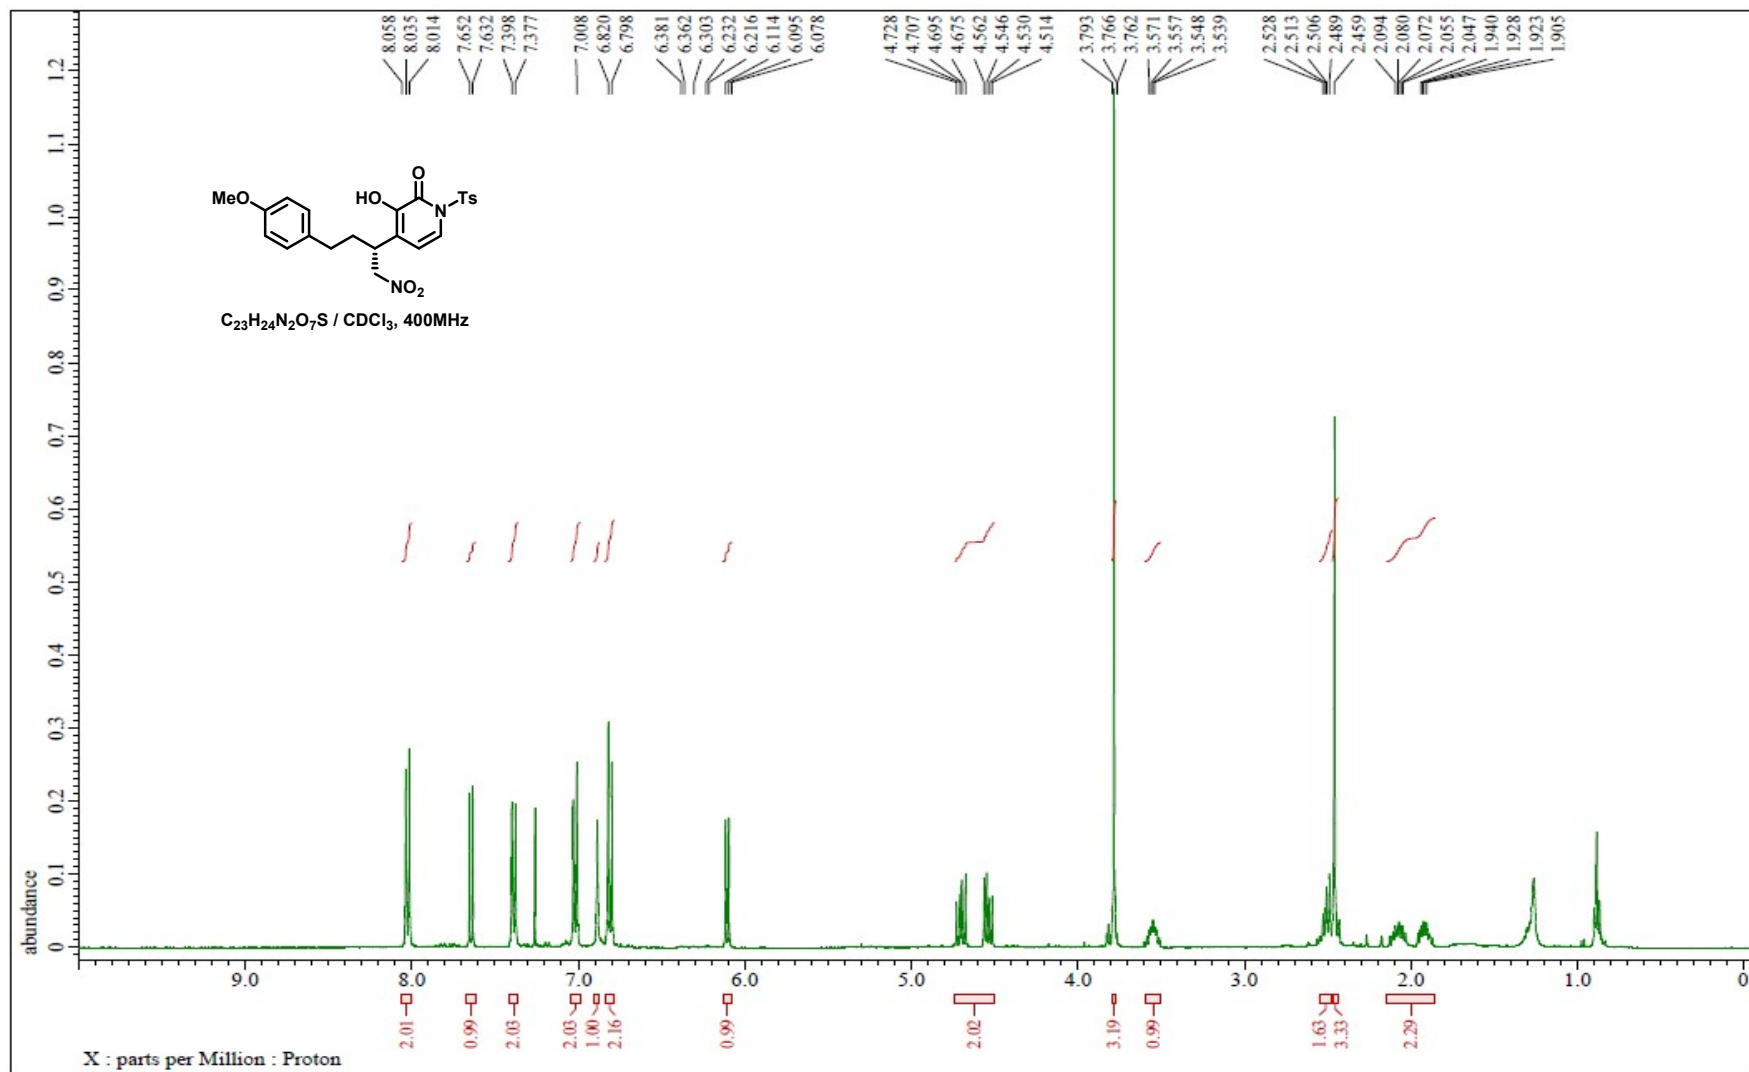

<sup>13</sup>C-NMR of compound (8t)

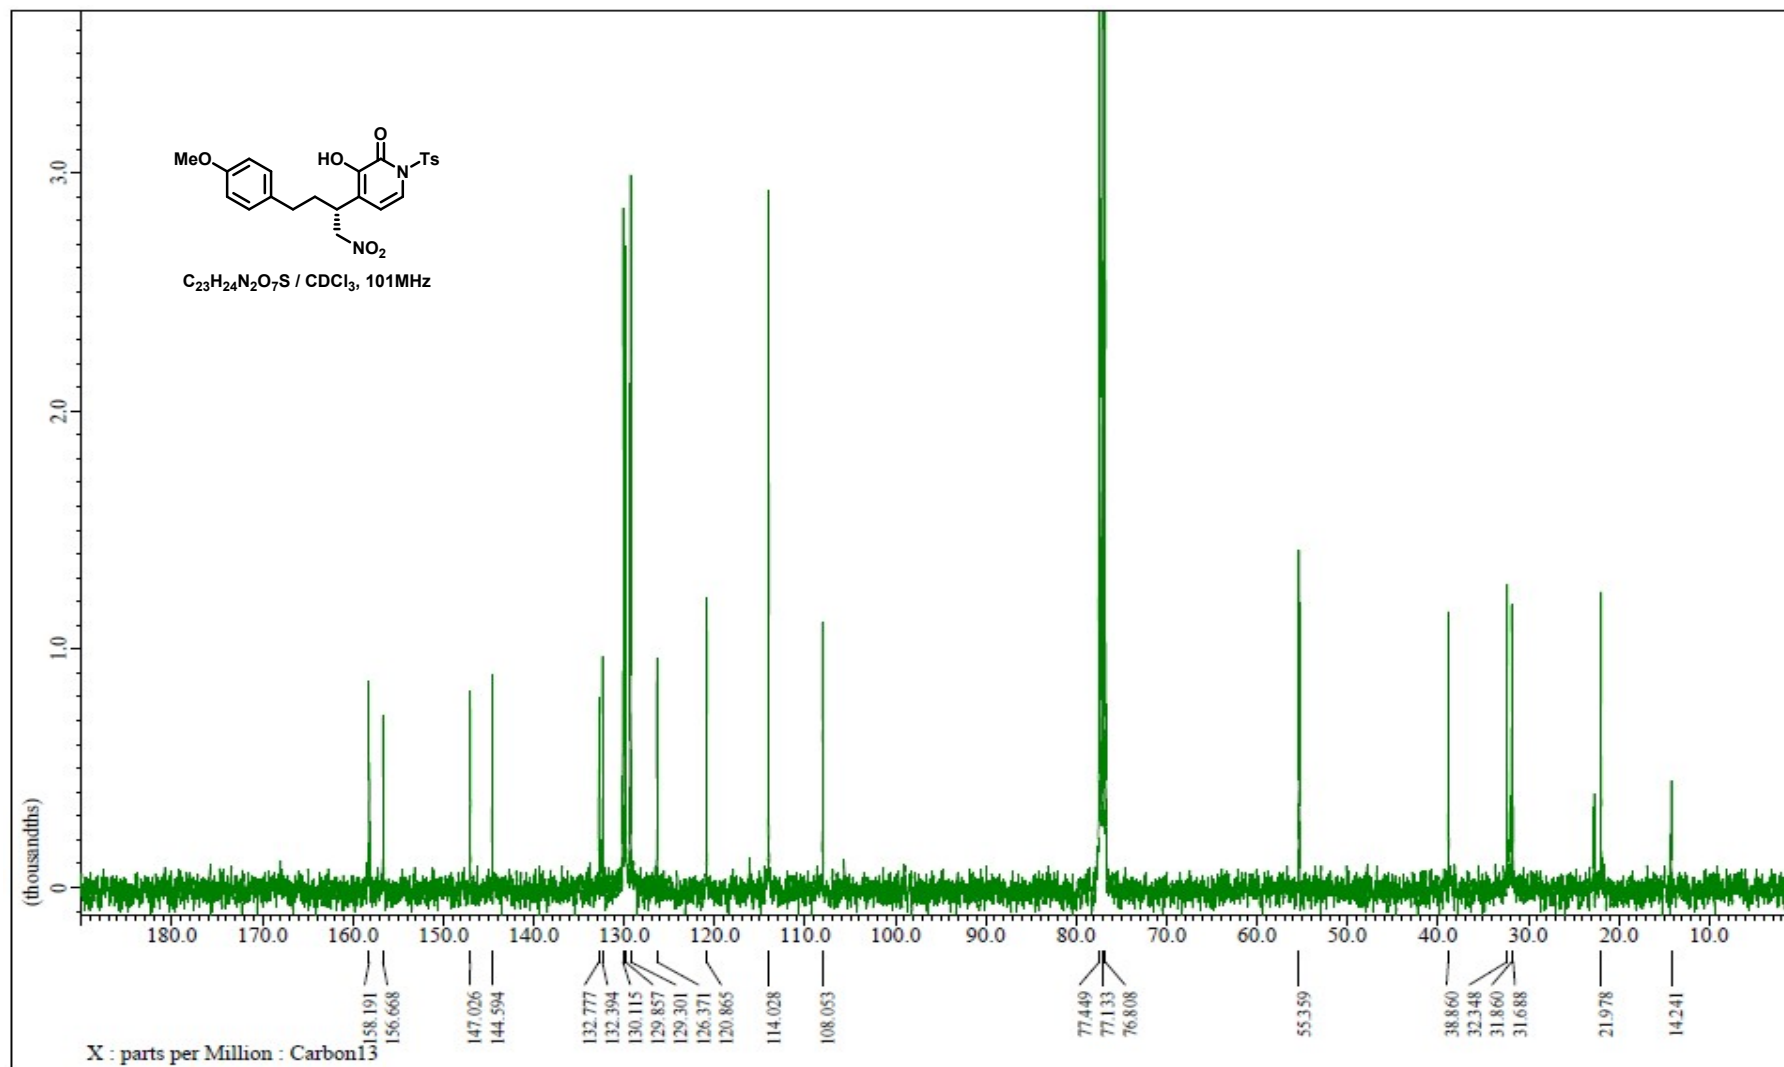

<sup>1</sup>H-NMR of compound (9)

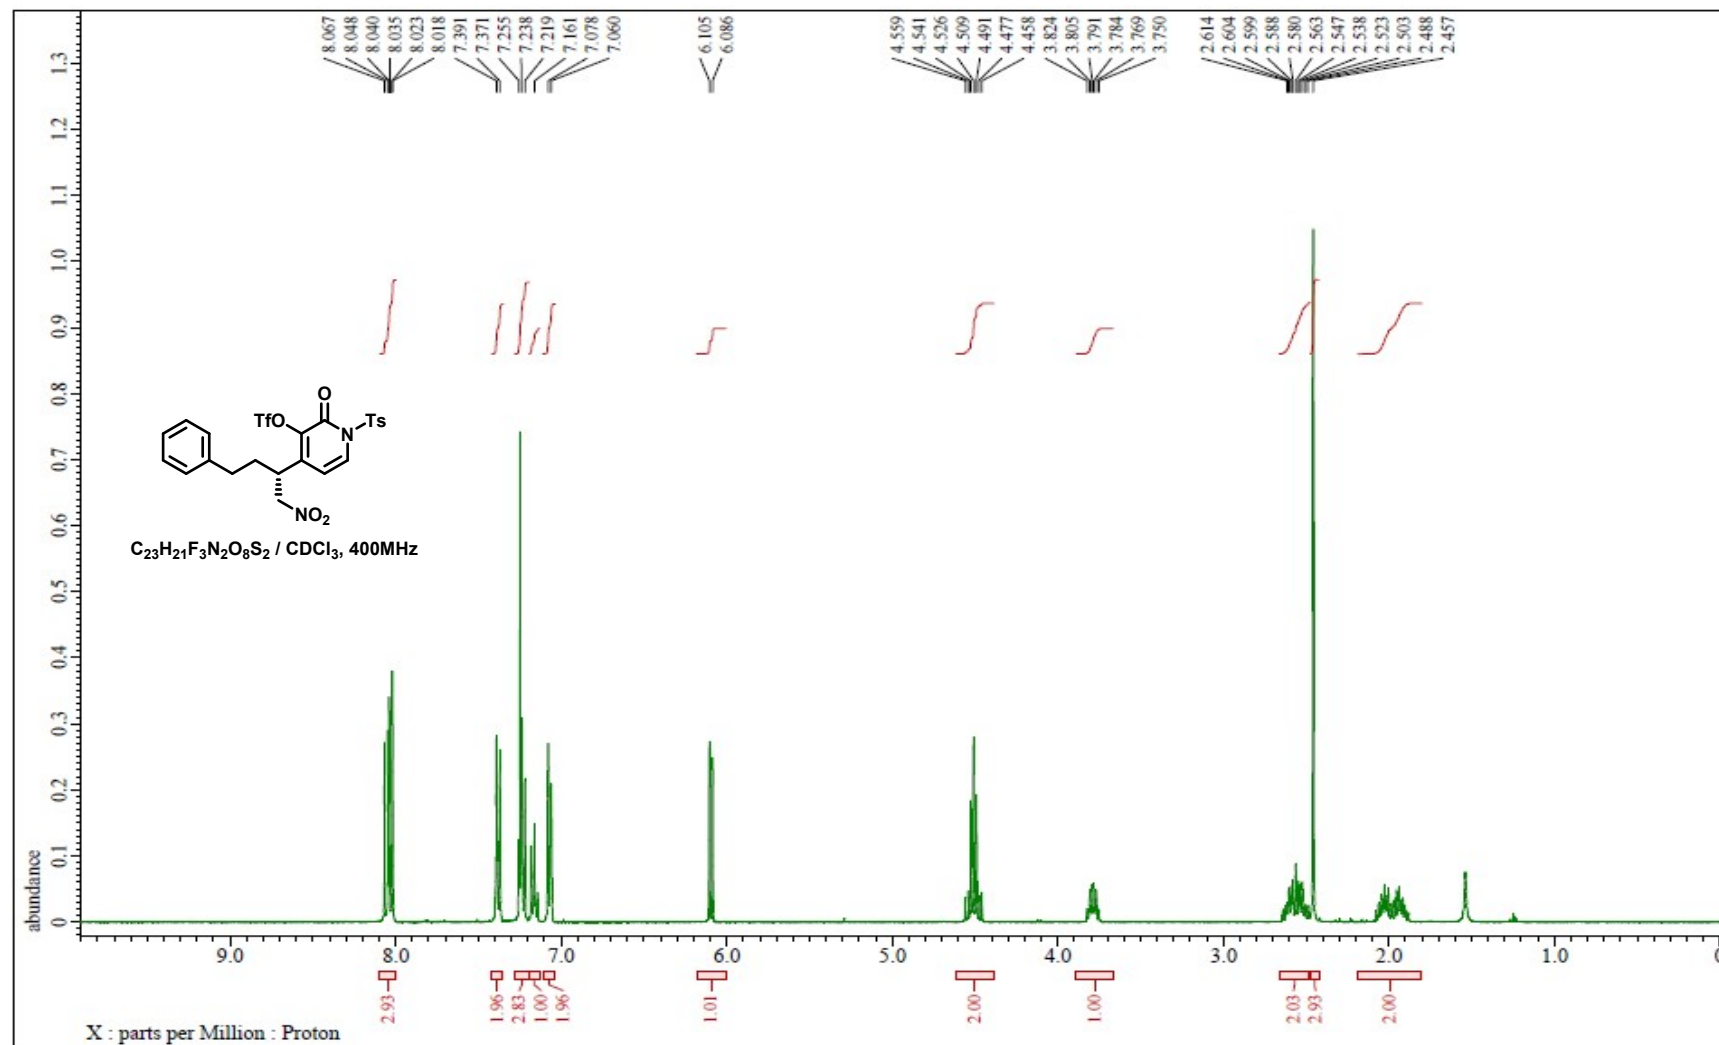

<sup>13</sup>C-NMR of compound (9)

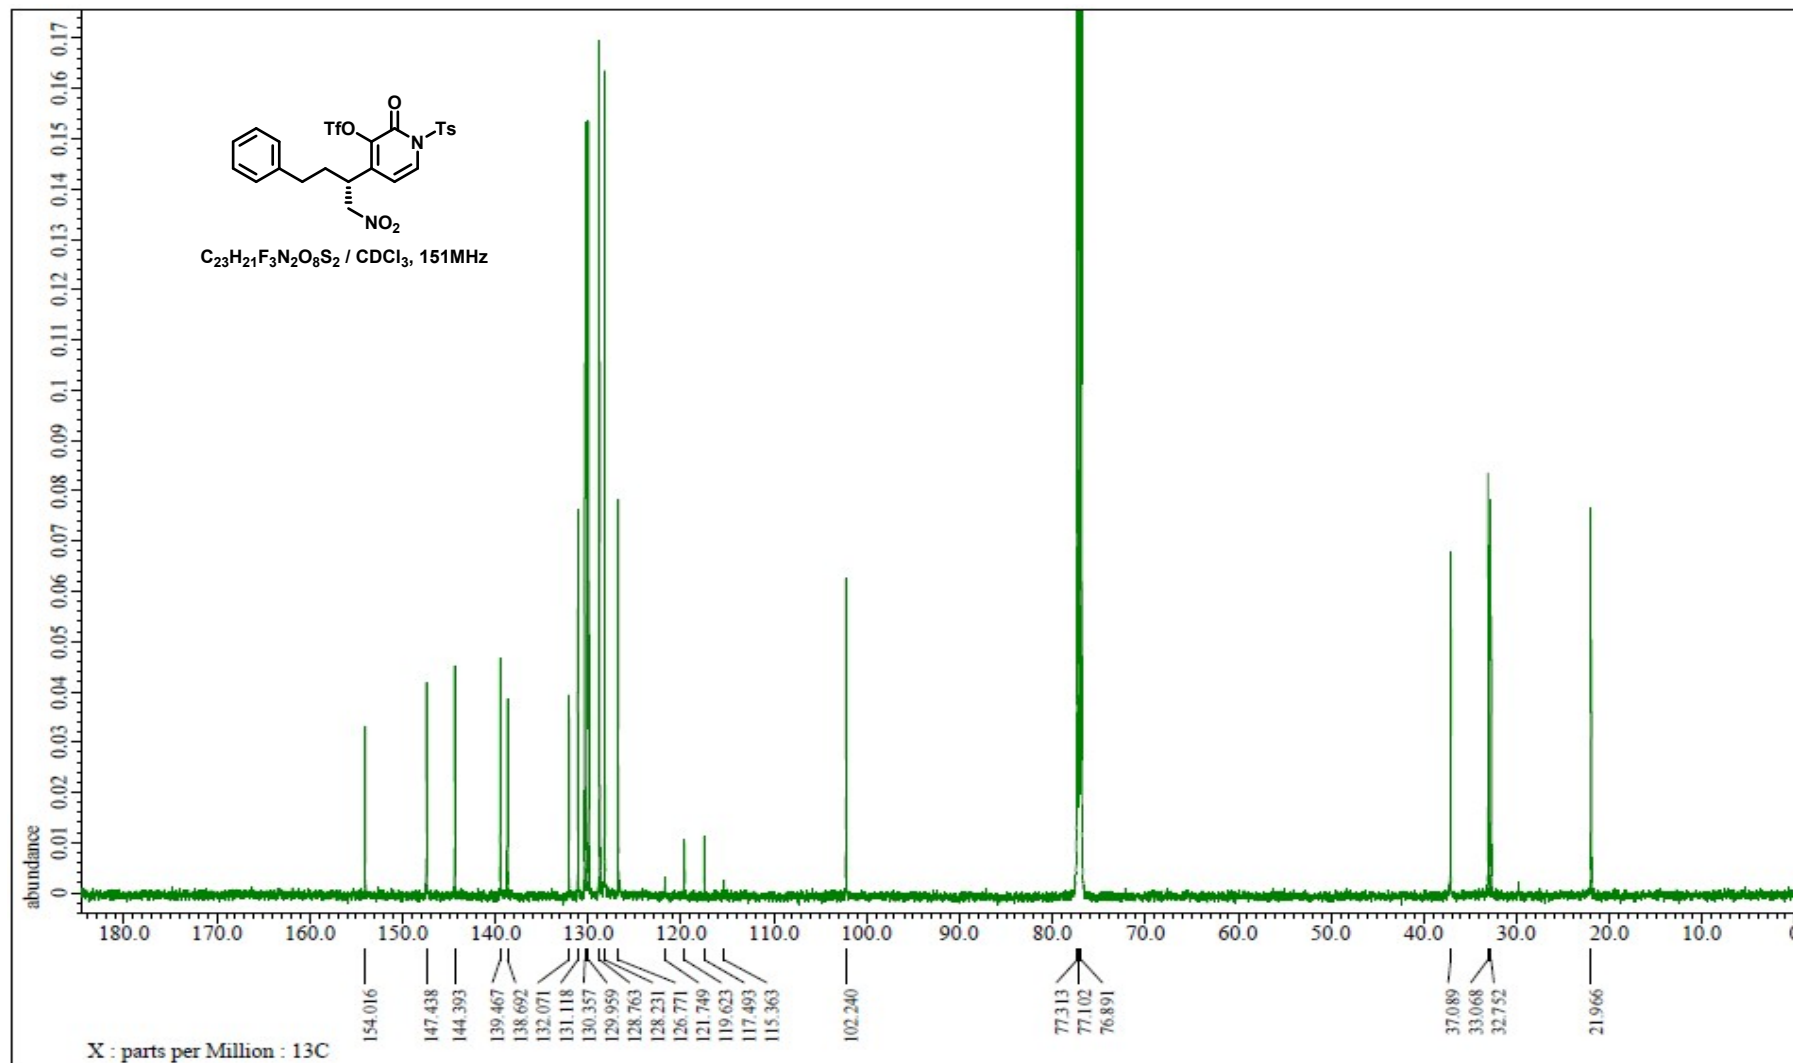

*<sup>19</sup>F-NMR of compound (9)*

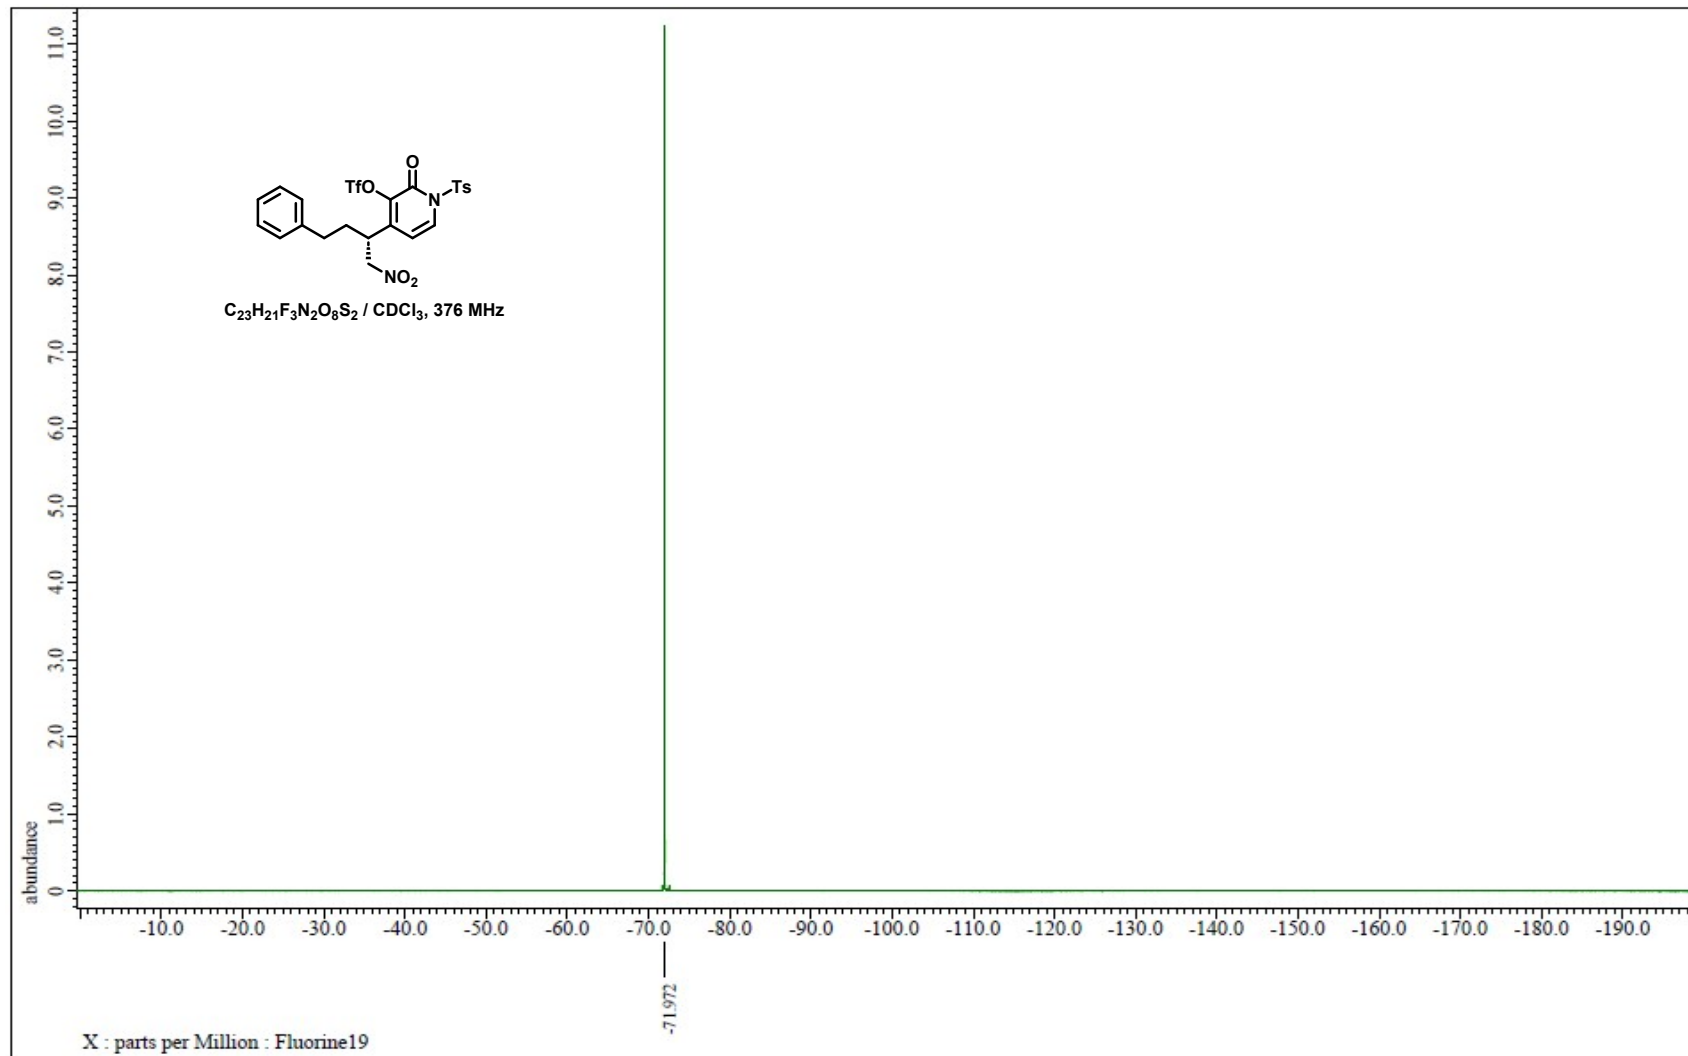

<sup>1</sup>H-NMR of compound (10)

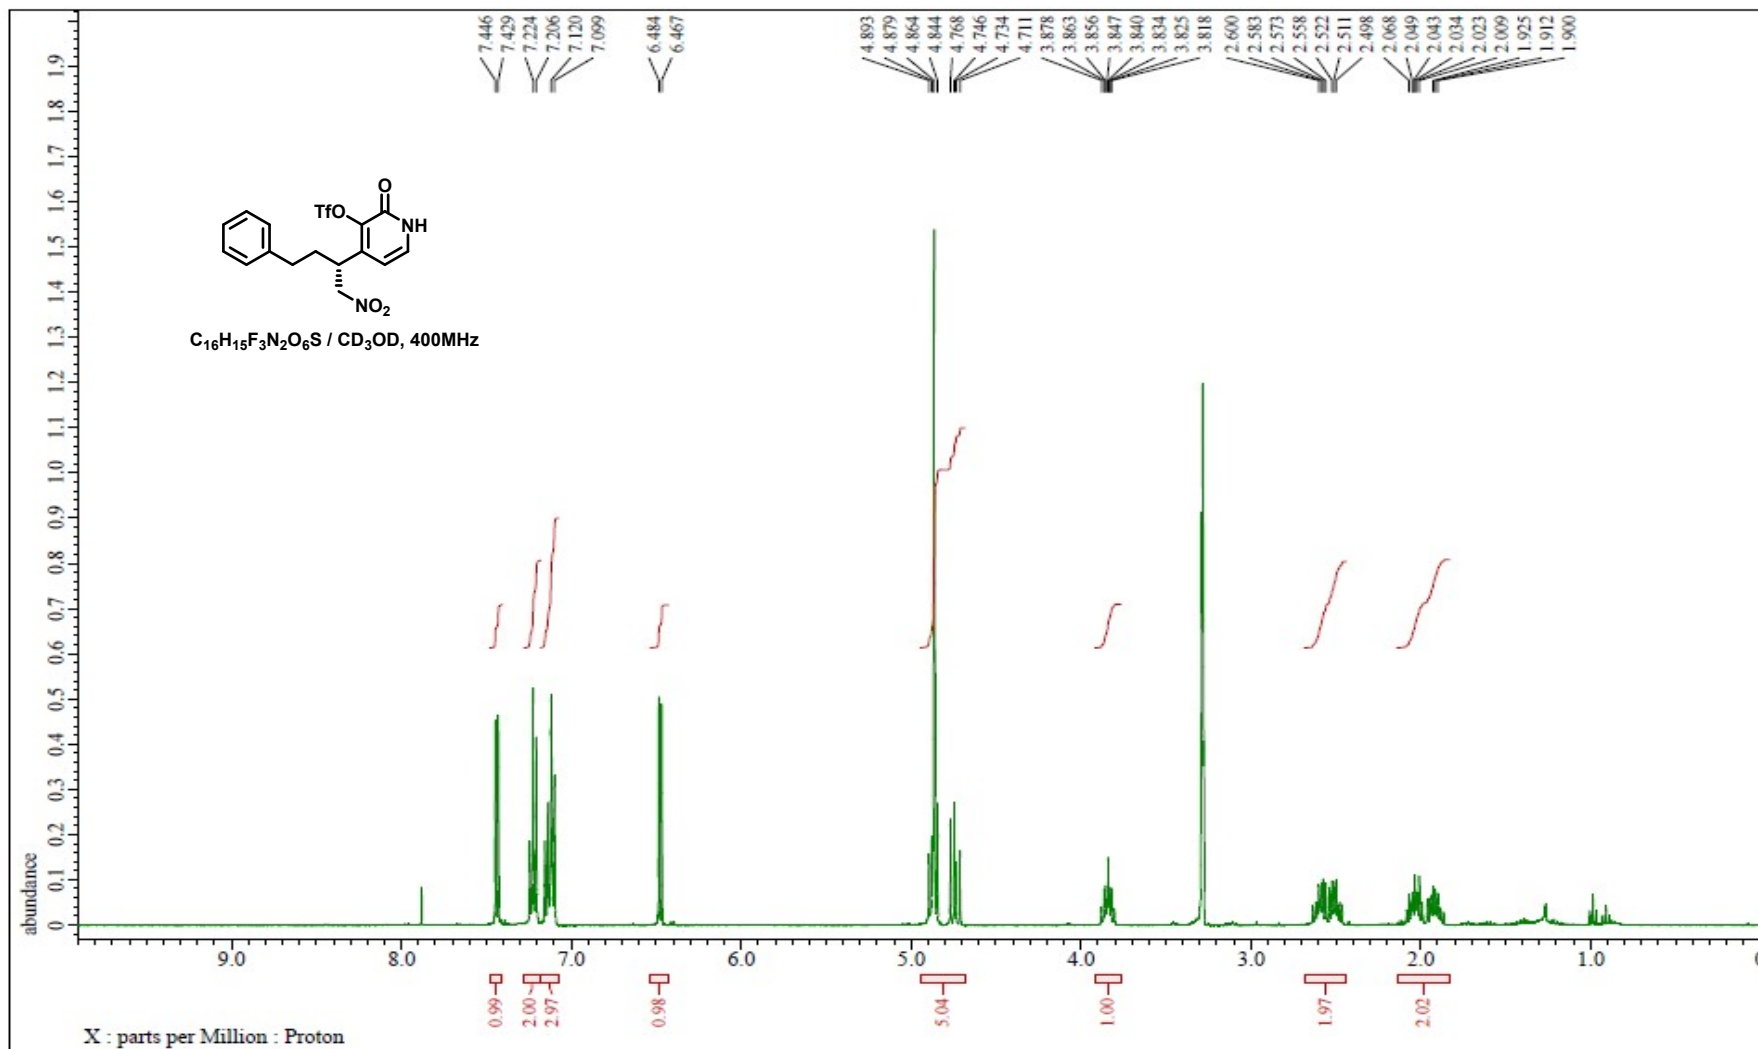



$^{13}\text{C}$ -NMR of compound (10)

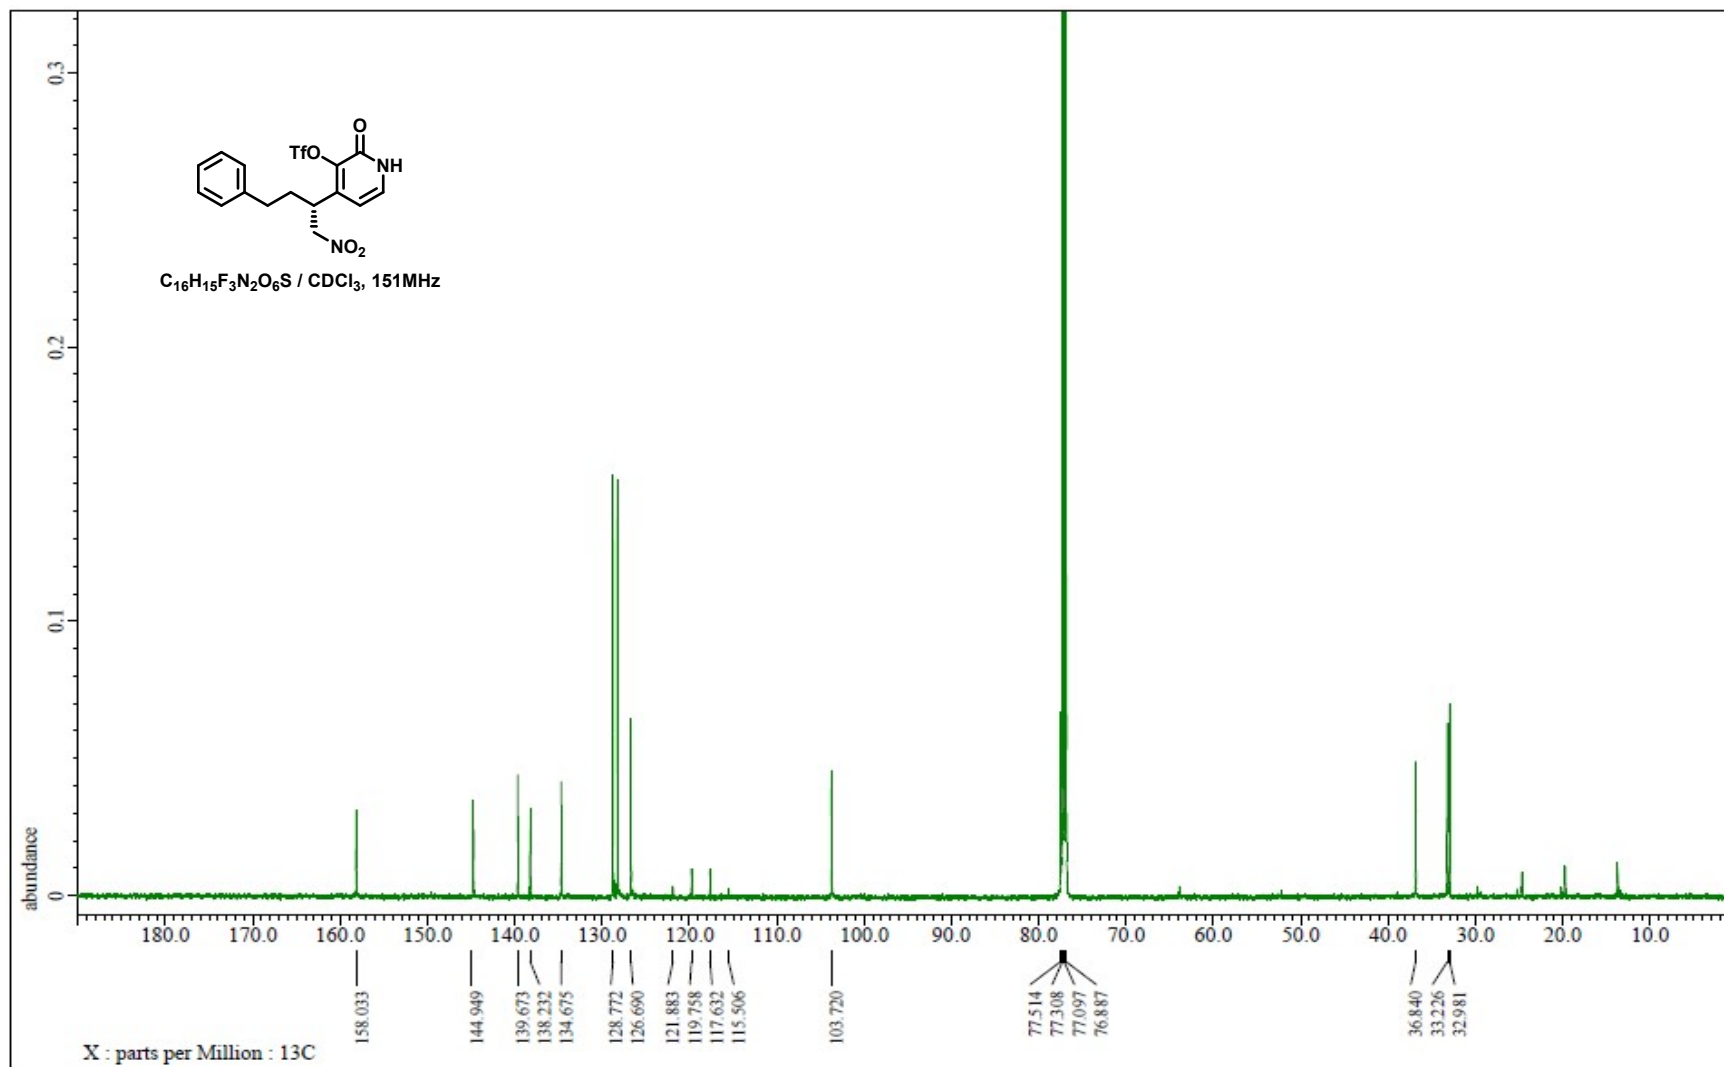

*<sup>19</sup>F -NMR of compound (10)*

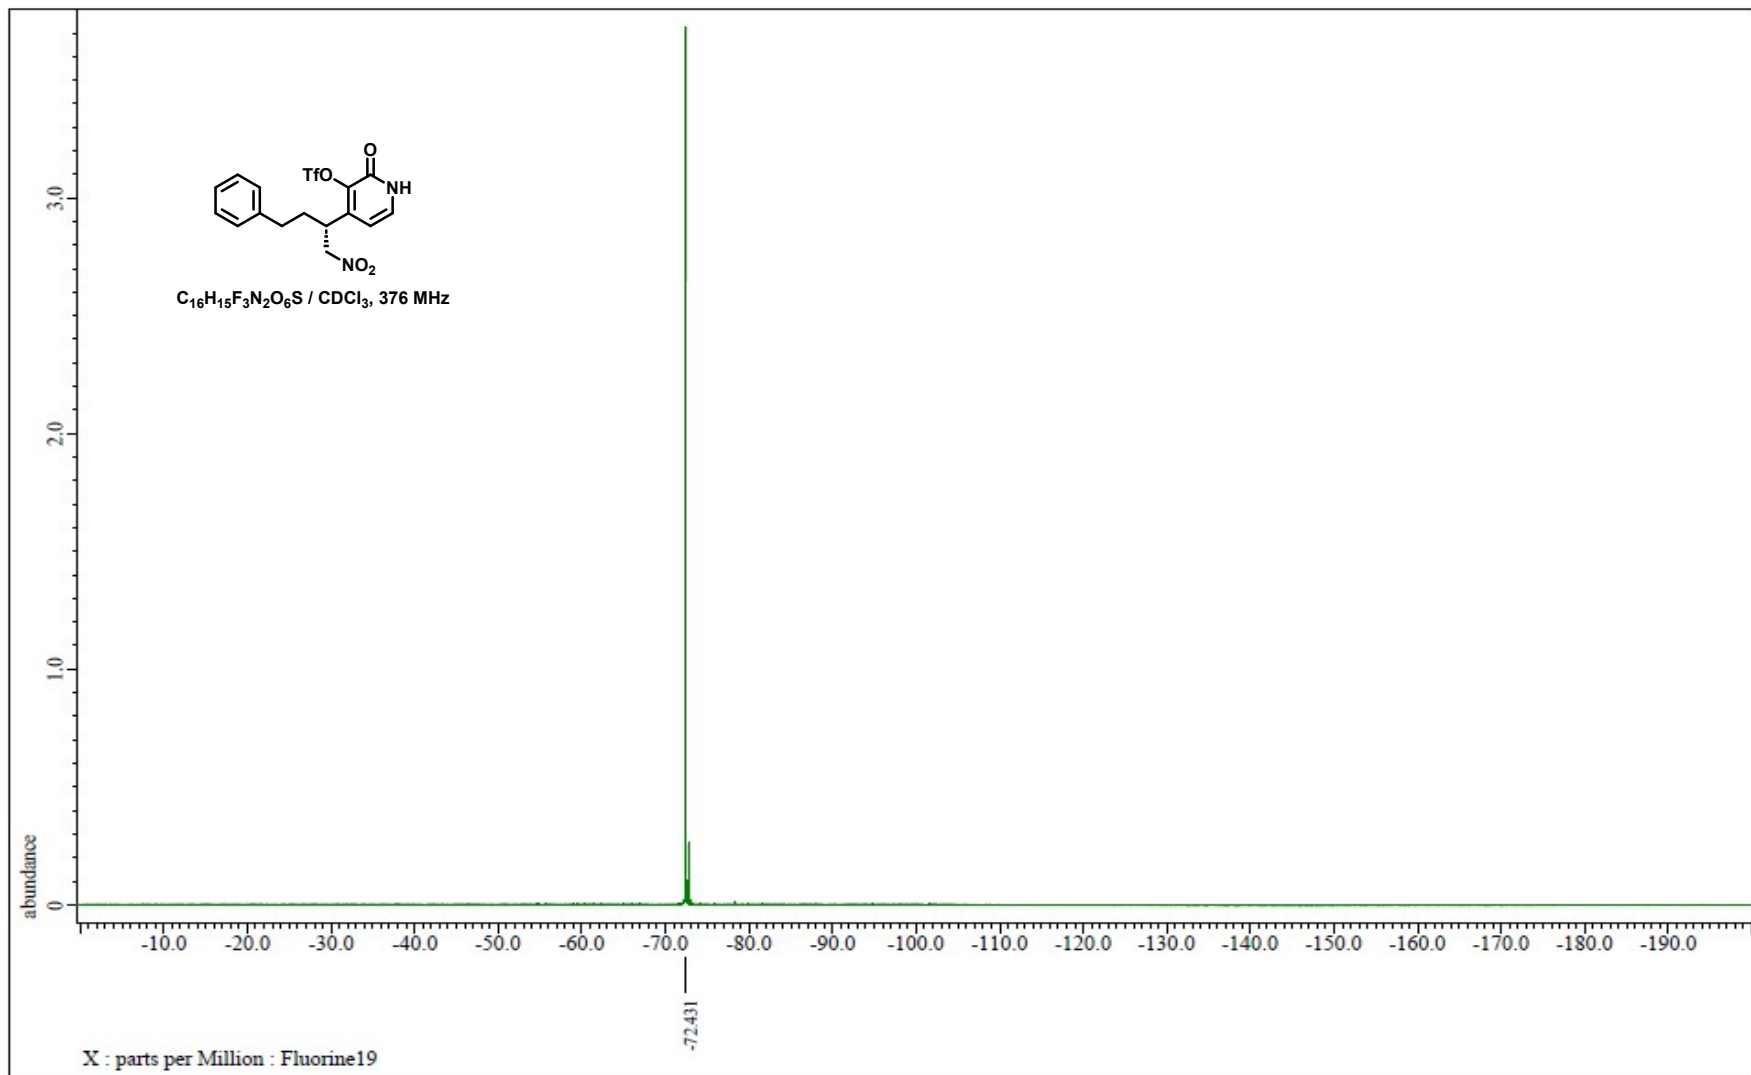

<sup>1</sup>H-NMR of compound (11)

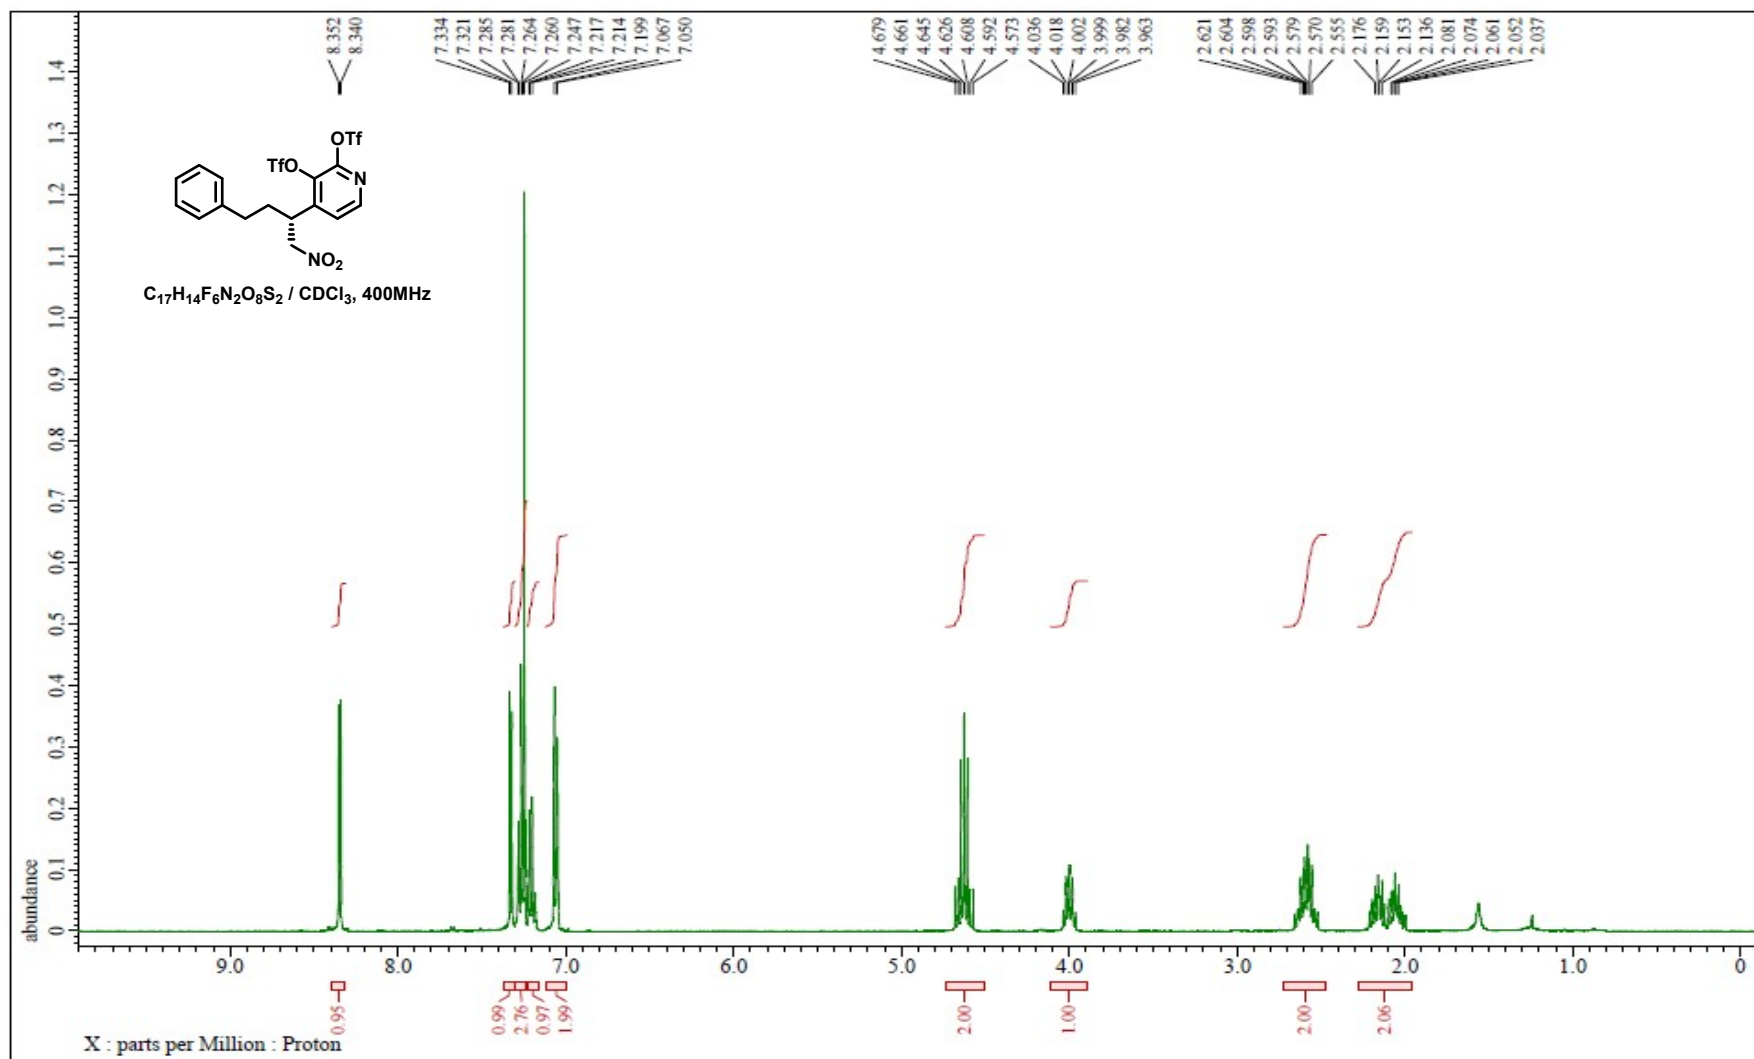

<sup>13</sup>C-NMR of compound (11)

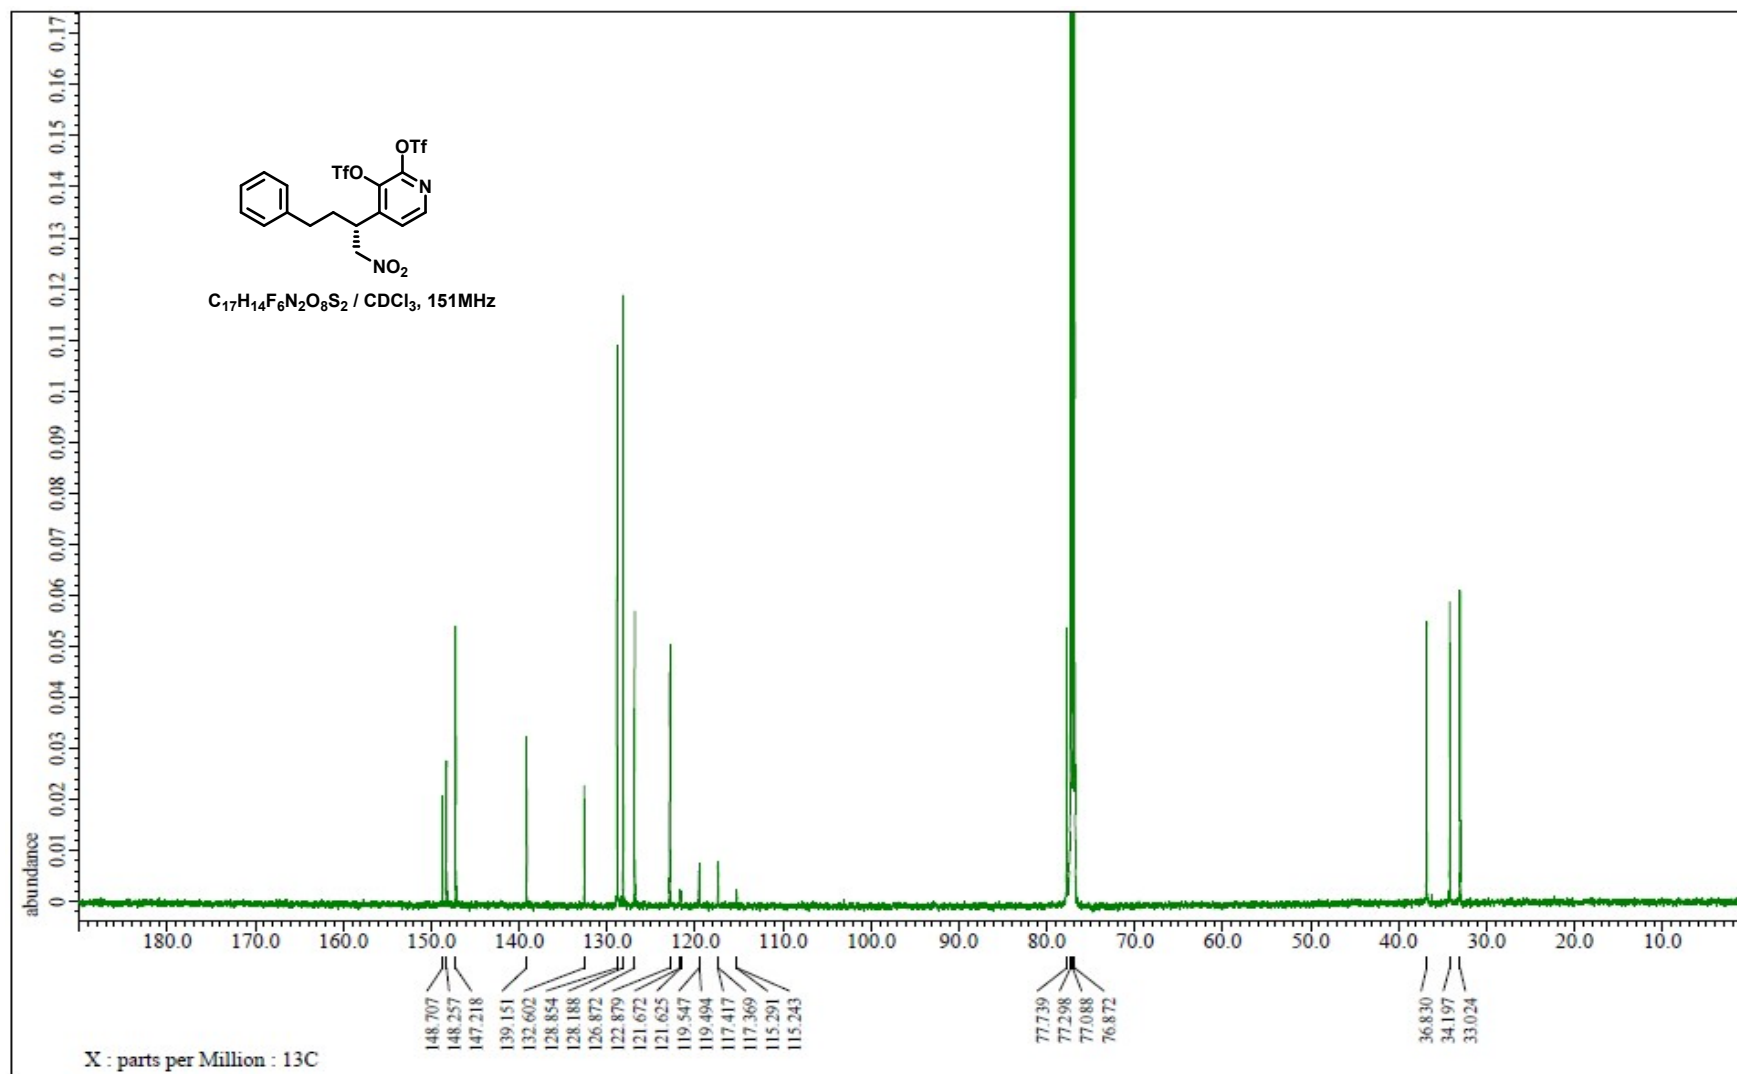

*<sup>19</sup>F-NMR of compound (11)*

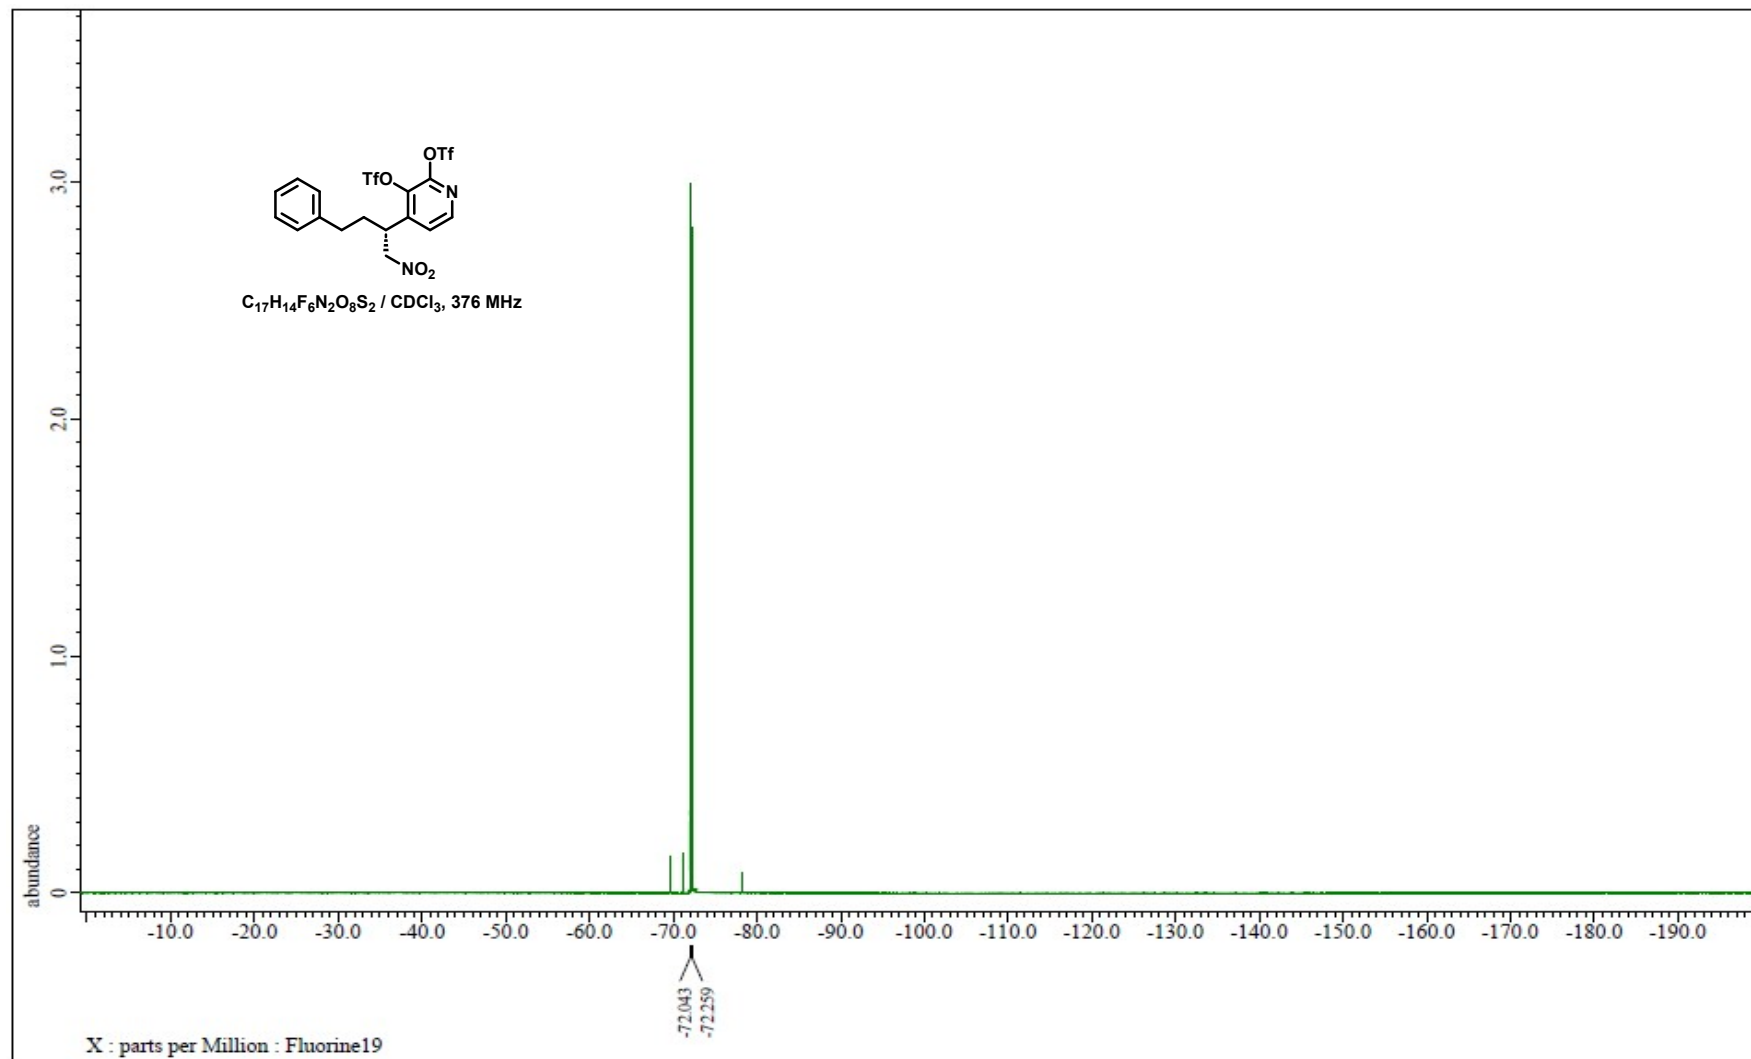

<sup>1</sup>H-NMR of compound (12)

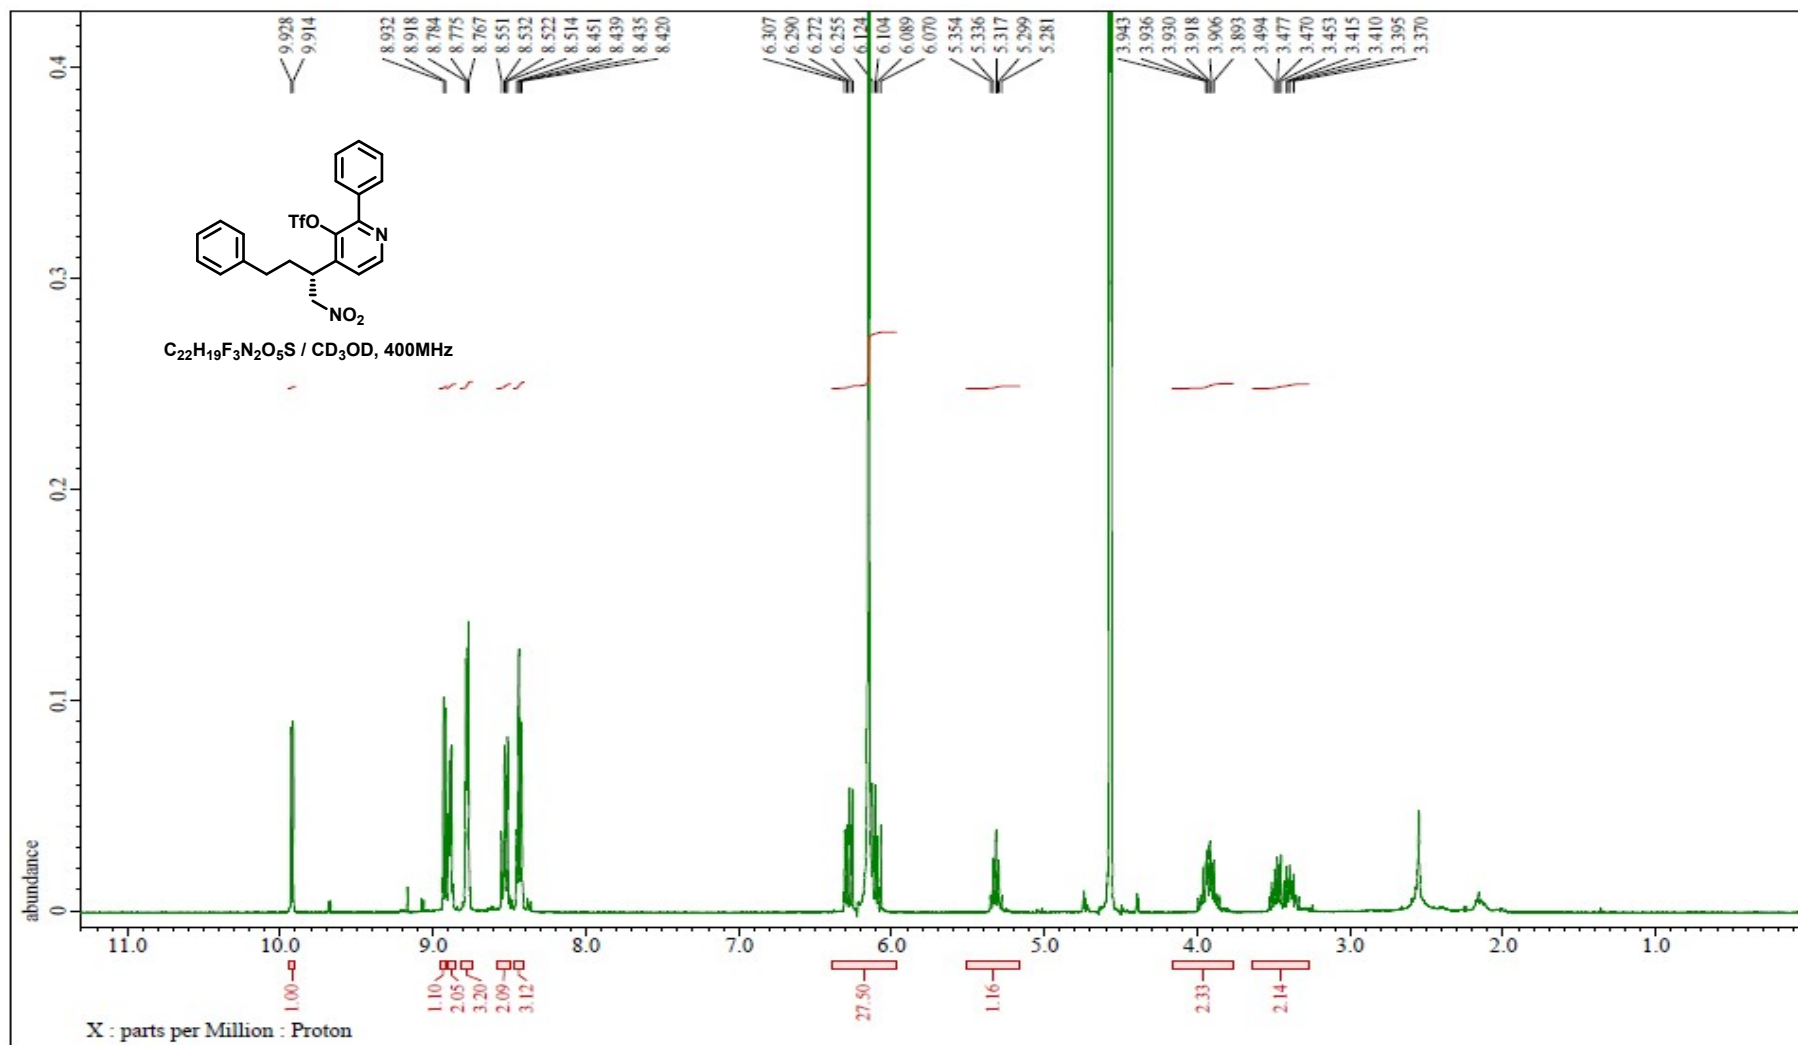

<sup>13</sup>C-NMR of compound (12)

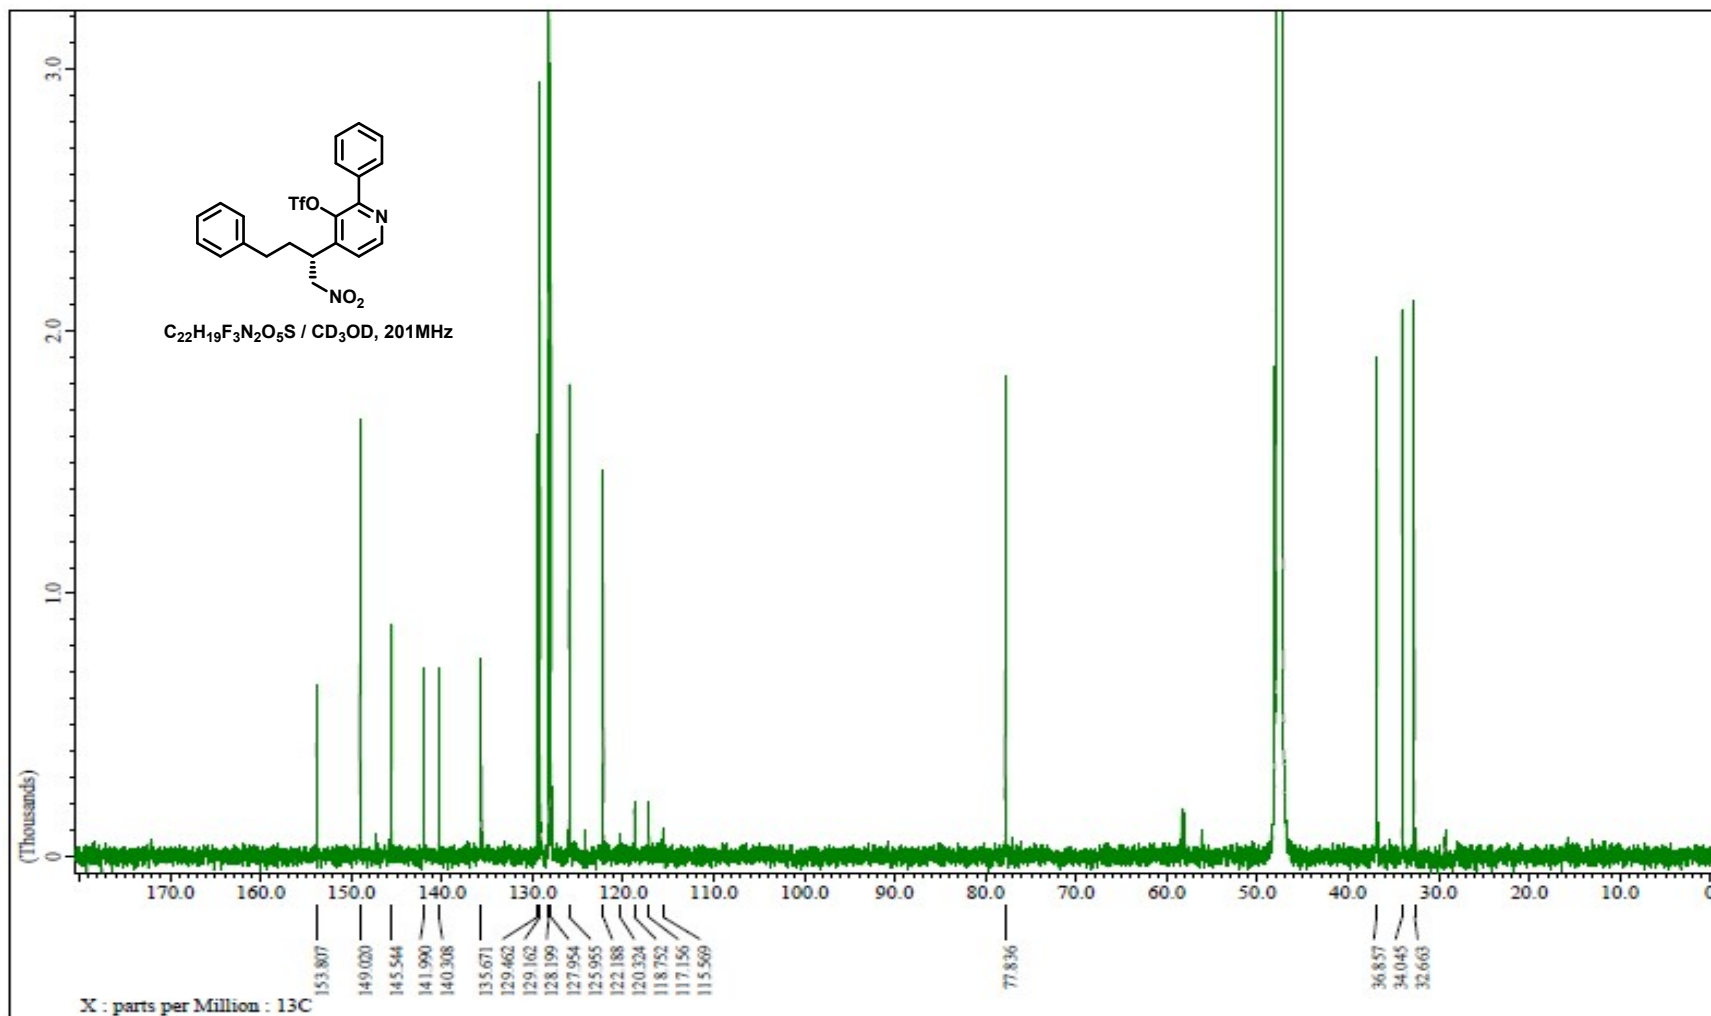

*<sup>19</sup>F -NMR of compound (12)*

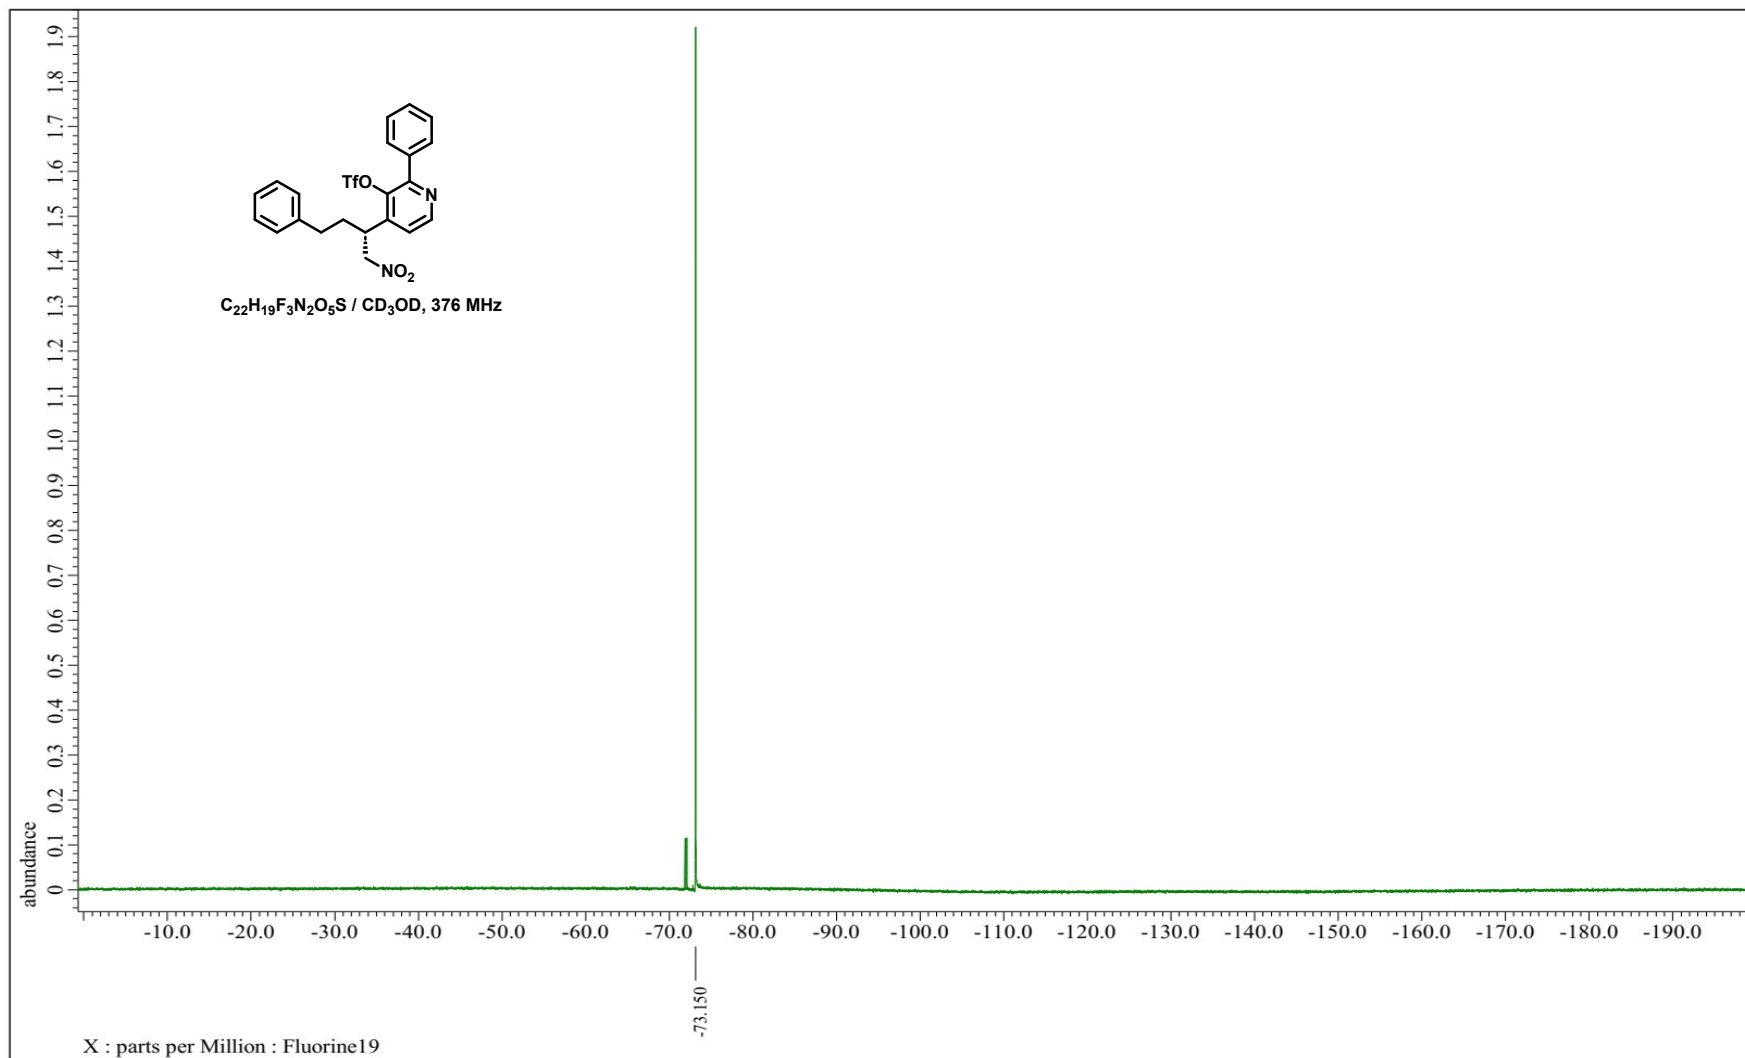



## (6) Chiral HPLC spectra

As the racemate products could not be obtained by using trimethylamine (TEA), the LC data of racemates were obtained by using catalyst **1a** which gave almost racemates.

### Area Percent Report

Instrument Name: L-2000 Software  
Version: Version LaChrom 890-8800-12  
Acquisition Method: DAICEL Chiralpak AD-H, hexane : 2-propanol = 80 : 20,  
flow rate = 0.5 ml/min, 23 °C,  $\lambda$  = 243 nm

Sample ID: *8a-rac*

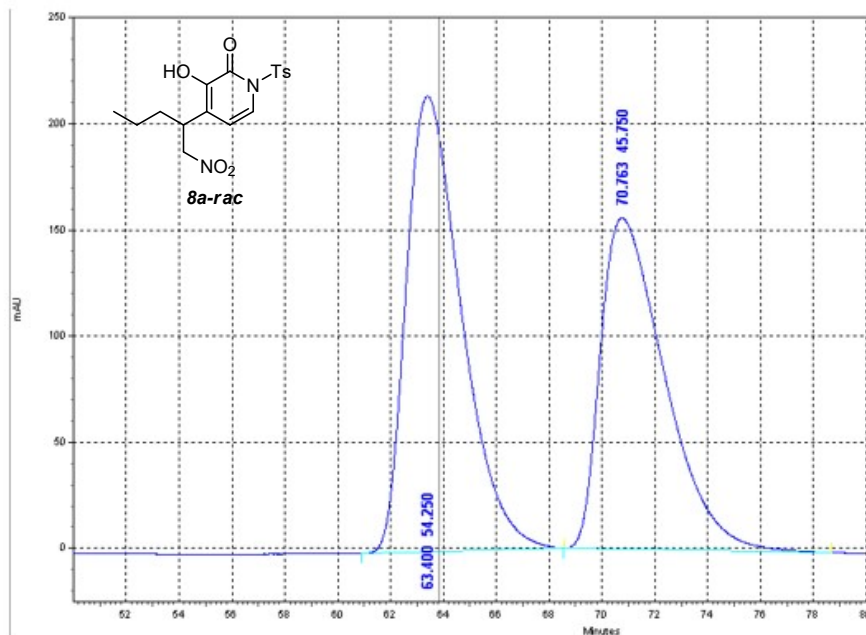

#### UV Results

| Name | Retention Time | Area      | Area Percent | Integration Codes |
|------|----------------|-----------|--------------|-------------------|
|      | 63.400         | 124770310 | 54.250       | MM                |
|      | 70.763         | 105222249 | 45.750       | MM                |

|        |  |           |         |  |
|--------|--|-----------|---------|--|
| Totals |  | 229992559 | 100.000 |  |
|--------|--|-----------|---------|--|

### Area Percent Report

Instrument Name: L-2000 Software  
Version: Version LaChrom 890-8800-12  
Acquisition Method: DAICEL Chiralpak AD-H, hexane : 2-propanol = 80 : 20,  
flow rate = 0.5 ml/min, 23 °C,  $\lambda$  = 243 nm

Sample ID: *8a-chiral*

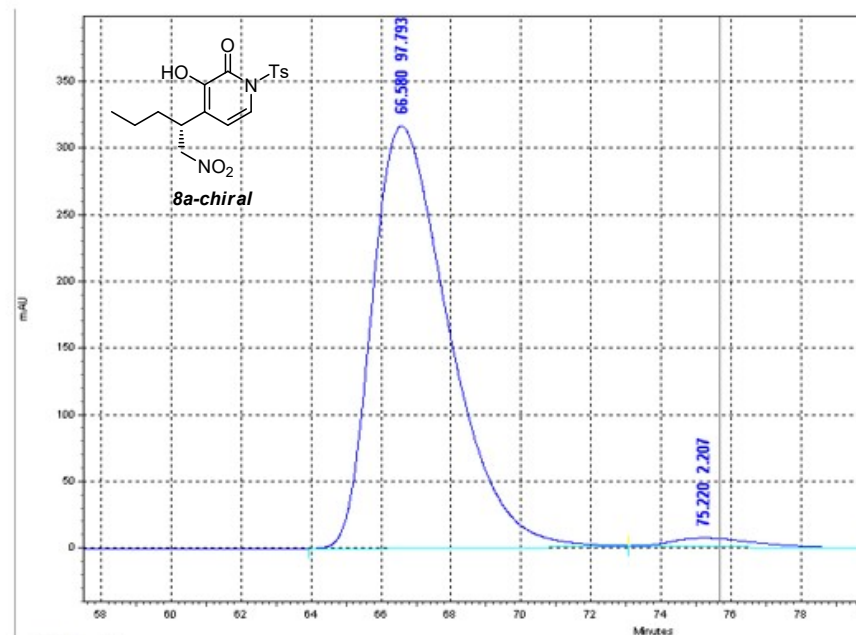

#### UV Results

| Name | Retention Time | Area      | Area Percent | Integration Codes |
|------|----------------|-----------|--------------|-------------------|
|      | 66.580         | 192443637 | 97.793       | MM                |
|      | 75.220         | 4342587   | 2.207        | MM                |

|        |  |           |         |  |
|--------|--|-----------|---------|--|
| Totals |  | 196786224 | 100.000 |  |
|--------|--|-----------|---------|--|

## Area Percent Report

Instrument Name: L-2000 Software

Version: Version LaChrom 890-8800-12

Acquisition Method: DAICEL Chiralpak ID, hexane : 2-propanol = 30 : 70,  
flow rate = 0.5 ml/min, 23 °C,  $\lambda$  = 243 nm

Sample ID: *8b-rac*

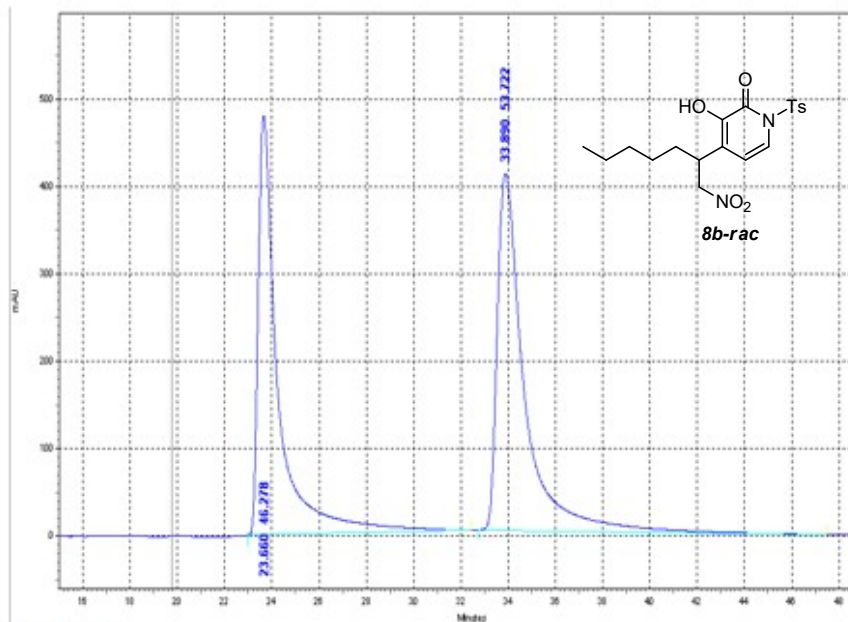

### UV Results

| Name | Retention Time | Area      | Area Percent | Integration Codes |
|------|----------------|-----------|--------------|-------------------|
|      | 23.660         | 112768381 | 46.278       | MM                |
|      | 33.890         | 130908757 | 53.722       | MM                |

| Totals | Area      | Area Percent |
|--------|-----------|--------------|
|        | 243677138 | 100.000      |

## Area Percent Report

Instrument Name: L-2000 Software

Version: Version LaChrom 890-8800-12

Acquisition Method: DAICEL Chiralpak ID, hexane : 2-propanol = 30 : 70,  
flow rate = 0.5 ml/min, 23 °C,  $\lambda$  = 243 nm

Sample ID: *8b-chiral*

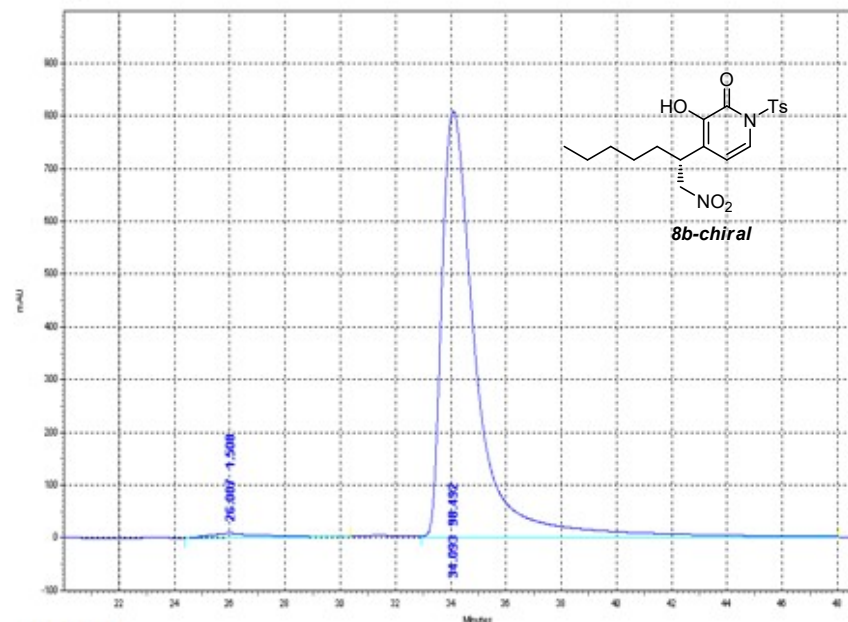

### UV Results

| Name | Retention Time | Area      | Area Percent | Integration Codes |
|------|----------------|-----------|--------------|-------------------|
|      | 26.007         | 4236099   | 1.508        | MM                |
|      | 34.093         | 276754046 | 98.492       | hh                |

| Totals | Area      | Area Percent |
|--------|-----------|--------------|
|        | 280990145 | 100.000      |

## Area Percent Report

Instrument Name: L-2000 Software  
 Version: Version LaChrom 890-8800-12  
 Acquisition Method: DAICEL Chiralpak ID, hexane : 2-propanol = 30 : 70,  
 flow rate = 0.5 ml/min, 23 °C,  $\lambda$  = 243 nm

Sample ID: *8c-rac*

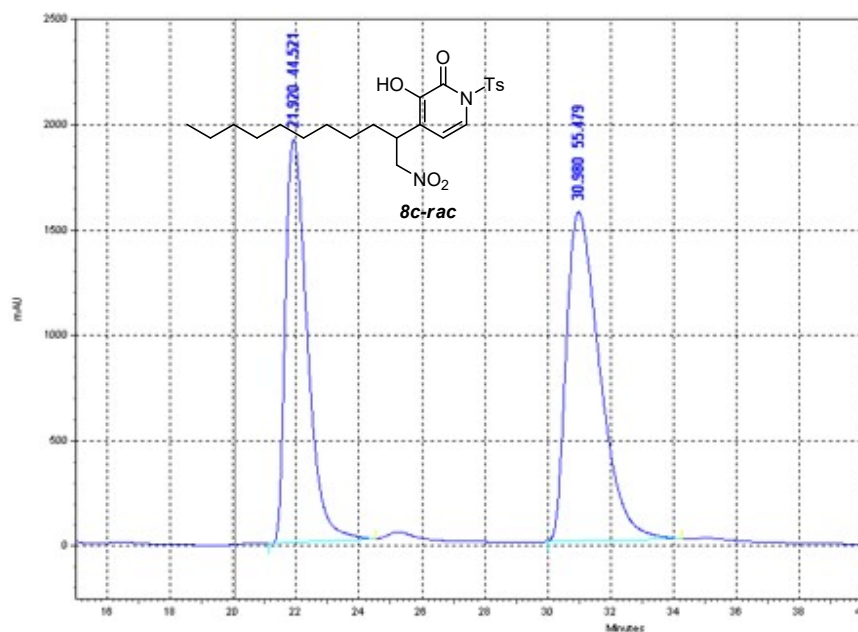

### UV Results

| Name | Retention Time | Area      | Area Percent | Integration Codes |
|------|----------------|-----------|--------------|-------------------|
|      | 21.920         | 369823763 | 44.521       | MM                |
|      | 30.980         | 460849123 | 55.479       | MM                |

|        |  |           |         |  |
|--------|--|-----------|---------|--|
| Totals |  | 830672886 | 100.000 |  |
|--------|--|-----------|---------|--|

## Area Percent Report

Instrument Name: L-2000 Software  
 Version: Version LaChrom 890-8800-12  
 Acquisition Method: DAICEL Chiralpak ID, hexane : 2-propanol = 30 : 70,  
 flow rate = 0.5 ml/min, 23 °C,  $\lambda$  = 243 nm

Sample ID: *8c-chiral*

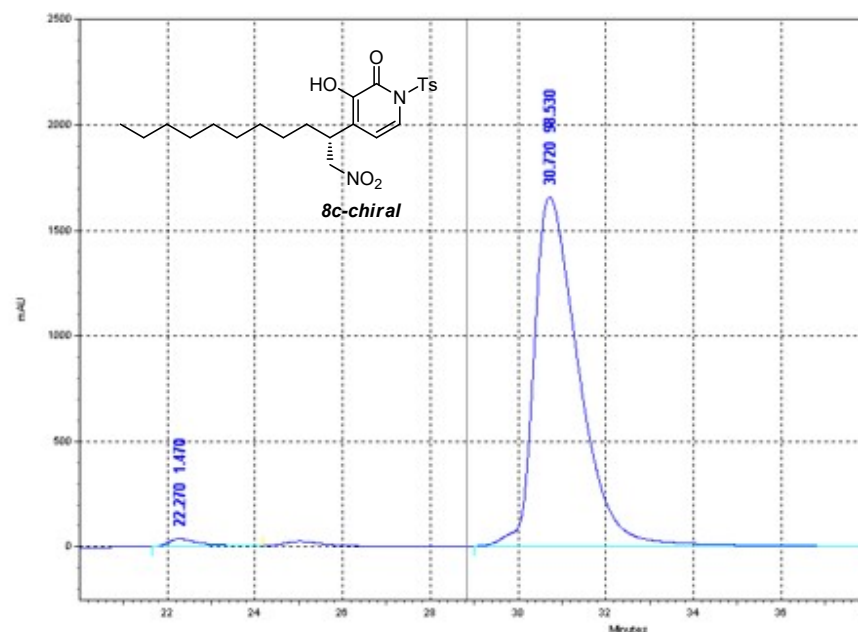

### UV Results

| Name | Retention Time | Area      | Area Percent | Integration Codes |
|------|----------------|-----------|--------------|-------------------|
|      | 22.270         | 7022340   | 1.470        | MM                |
|      | 30.720         | 470638402 | 98.530       | MM                |

|        |  |           |         |  |
|--------|--|-----------|---------|--|
| Totals |  | 477660742 | 100.000 |  |
|--------|--|-----------|---------|--|

## Area Percent Report

Instrument Name: L-2000 Software  
 Version: Version LaChrom 890-8800-12  
 Acquisition Method: DAICEL Chiralcel OD-H, hexane : 2-propanol = 95 : 05,  
 flow rate = 0.5 ml/min, 23 °C, λ = 243 nm

Sample ID: *8d-rac*

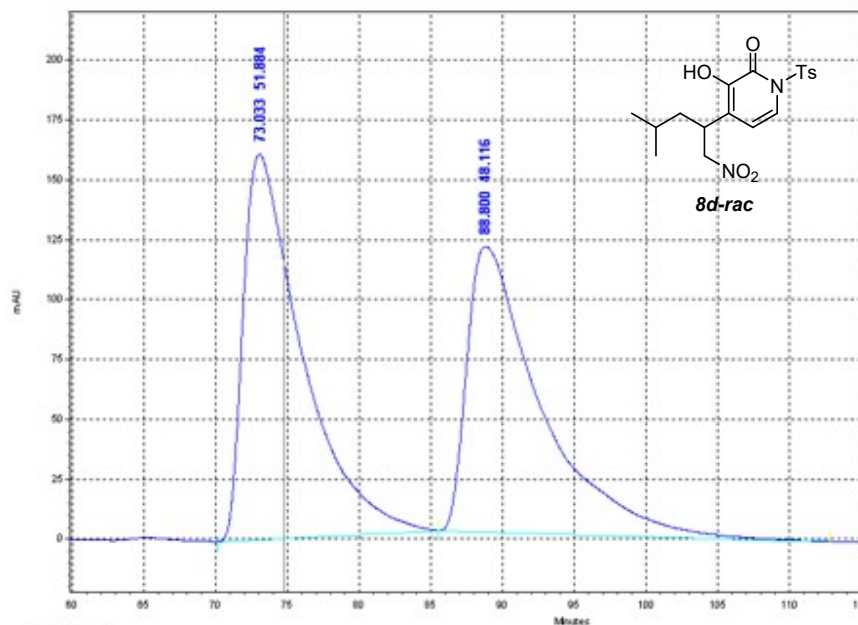

### UV Results

| Name | Retention Time | Area      | Area Percent | Integration Codes |
|------|----------------|-----------|--------------|-------------------|
|      | 73.033         | 182898127 | 51.884       | MM                |
|      | 88.800         | 169615431 | 48.116       | MM                |

| Totals | Area      | Area Percent |
|--------|-----------|--------------|
|        | 352513558 | 100.000      |

## Area Percent Report

Instrument Name: L-2000 Software  
 Version: Version LaChrom 890-8800-12  
 Acquisition Method: DAICEL Chiralcel OD-H, hexane : 2-propanol = 95 : 05,  
 flow rate = 0.5 ml/min, 23 °C, λ = 243 nm

Sample ID: *8d-chiral*

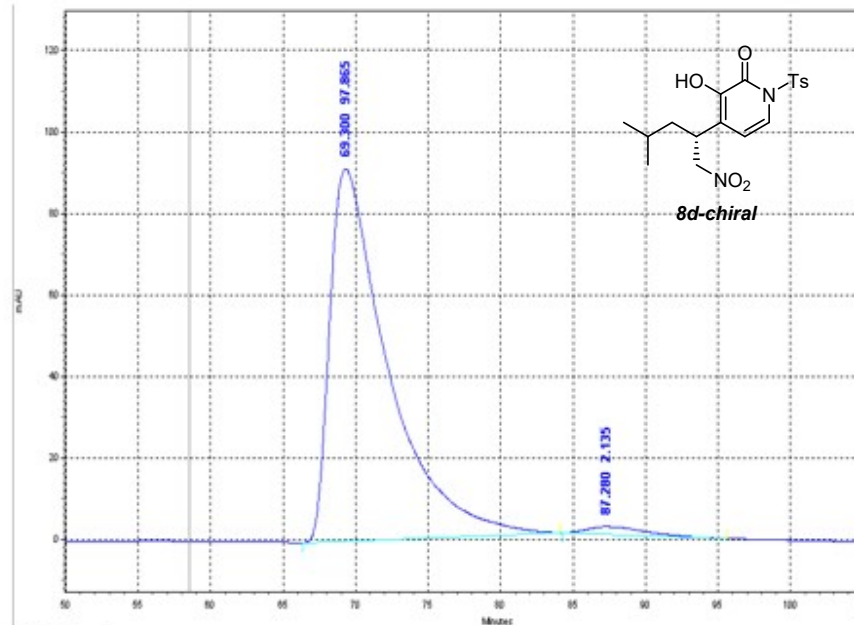

### UV Results

| Name | Retention Time | Area      | Area Percent | Integration Codes |
|------|----------------|-----------|--------------|-------------------|
|      | 69.300         | 102000884 | 97.865       | MM                |
|      | 87.280         | 2225738   | 2.135        | MM                |

| Totals | Area      | Area Percent |
|--------|-----------|--------------|
|        | 104226622 | 100.000      |

## Area Percent Report

Instrument Name: L-2000 Software  
 Version: Version LaChrom 890-8800-12  
 Acquisition Method: DAICEL Chiralpak ID, hexane : ethanol= 30 : 70,  
 flow rate = 0.5 ml/min, 23 °C, λ = 243 nm

Sample ID: *8e-rac*

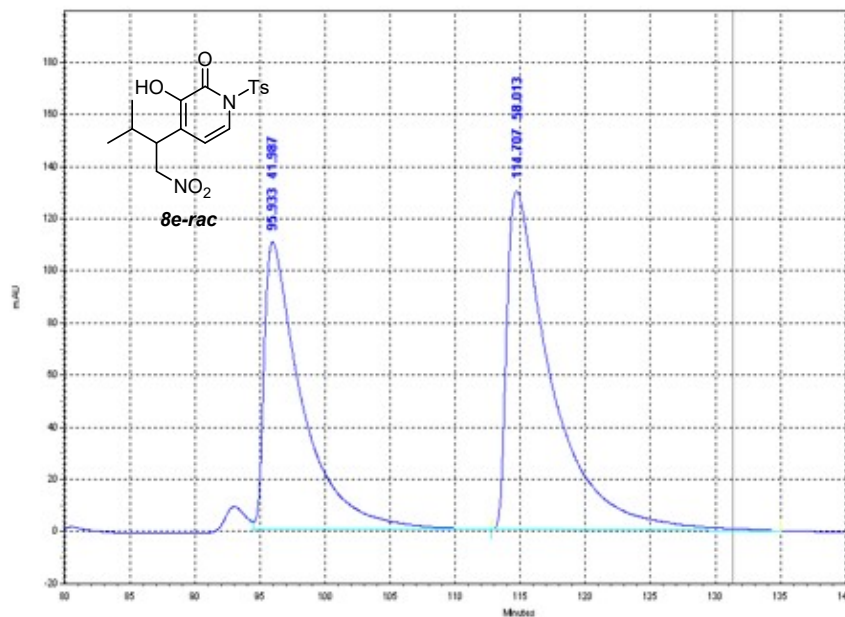

| UV Results |                |           |              |                   |
|------------|----------------|-----------|--------------|-------------------|
| Name       | Retention Time | Area      | Area Percent | Integration Codes |
|            | 95.933         | 89537606  | 41.987       | hh                |
|            | 114.707        | 123715610 | 58.013       | MM                |
| Totals     |                | 213253216 | 100.000      |                   |

## Area Percent Report

Instrument Name: L-2000 Software  
 Version: Version LaChrom 890-8800-12  
 Acquisition Method: DAICEL Chiralpak ID, hexane : ethanol= 30 : 70,  
 flow rate = 0.5 ml/min, 23 °C, λ = 243 nm

Sample ID: *8e-chiral*

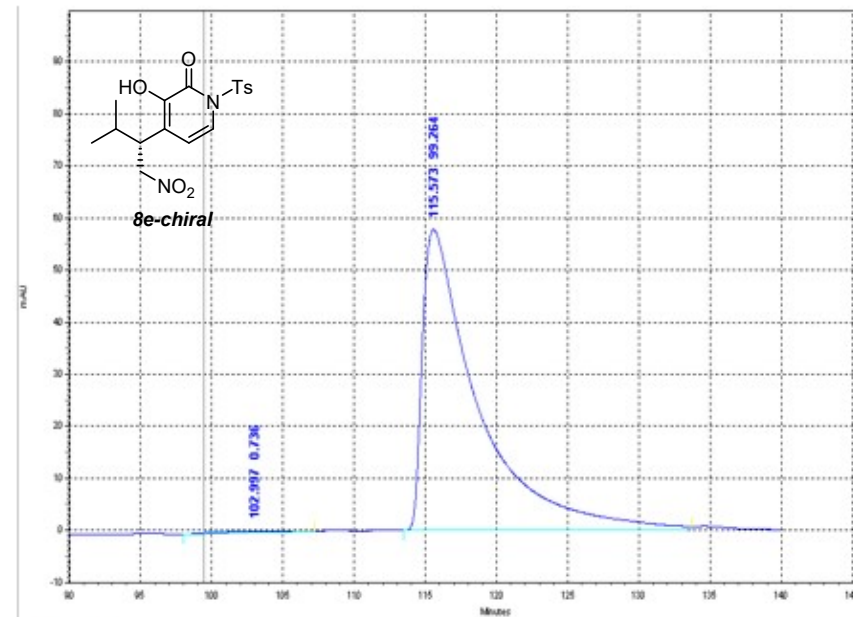

| UV Results |                |          |              |                   |
|------------|----------------|----------|--------------|-------------------|
| Name       | Retention Time | Area     | Area Percent | Integration Codes |
|            | 102.997        | 467299   | 0.736        | MM                |
|            | 115.573        | 63009558 | 99.264       | HH                |
| Totals     |                | 63476857 | 100.000      |                   |

## Area Percent Report

Instrument Name: L-2000 Software

Version: Version LaChrom 890-8800-12

Acquisition Method: DAICEL Chiralpak OJ-H, hexane : ethanol = 90 : 10,  
flow rate = 0.5 ml/min, 23 °C,  $\lambda$  = 243 nm

Sample ID: *8f-rac*

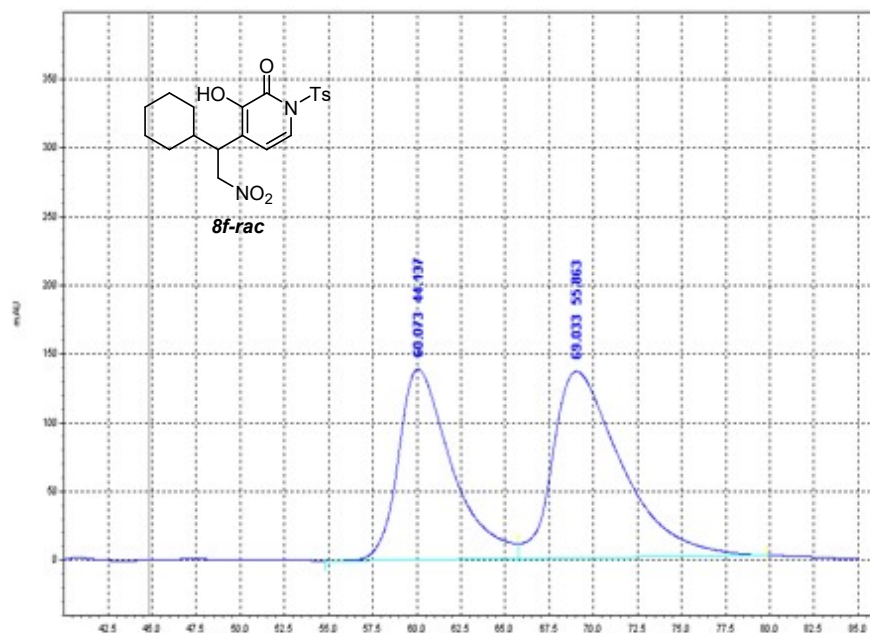

### UV Results

| Name | Retention Time | Area      | Area Percent | Integration Codes |
|------|----------------|-----------|--------------|-------------------|
|      | 60.073         | 116269302 | 44.137       | Mx                |
|      | 69.033         | 147161719 | 55.863       | xM                |

| Totals | Area      | Area Percent |
|--------|-----------|--------------|
|        | 263431021 | 100.000      |

## Area Percent Report

Instrument Name: L-2000 Software

Version: Version LaChrom 890-8800-12

Acquisition Method: DAICEL Chiralpak OJ-H, hexane : ethanol = 90 : 10,  
flow rate = 0.5 ml/min, 23 °C,  $\lambda$  = 243 nm

Sample ID: *8f-chiral*

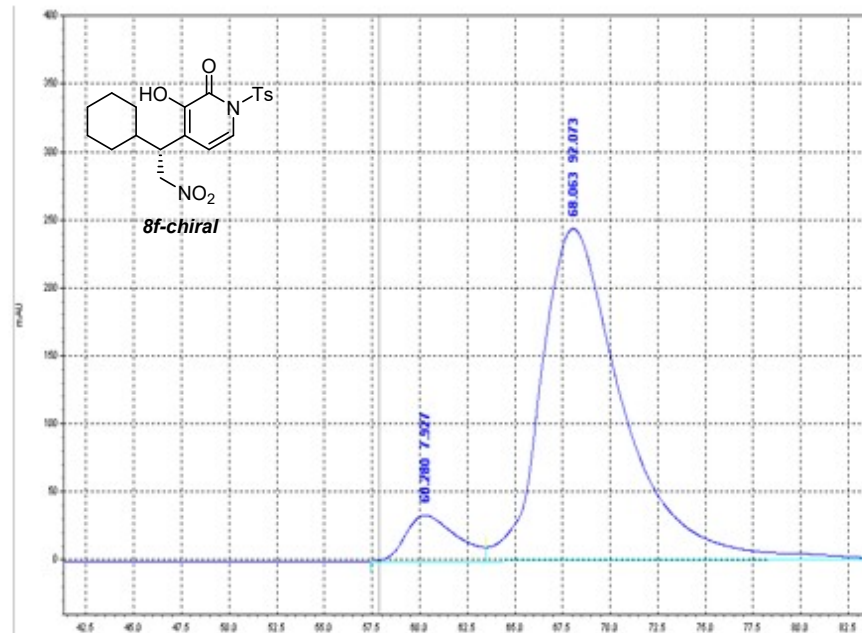

### UV Results

| Name | Retention Time | Area      | Area Percent | Integration Codes |
|------|----------------|-----------|--------------|-------------------|
|      | 60.280         | 25156356  | 7.927        | Mx                |
|      | 68.063         | 292212393 | 92.073       | xM                |

| Totals | Area      | Area Percent |
|--------|-----------|--------------|
|        | 317368749 | 100.000      |

## Area Percent Report

Instrument Name: L-2000 Software  
 Version: Version LaChrom 890-8800-12  
 Acquisition Method: DAICEL Chiralcel OD-H, hexane : 2-propanol = 70 : 30,  
 flow rate = 0.5 ml/min, 23 °C,  $\lambda$  = 243 nm

Sample ID: *8h-rac*

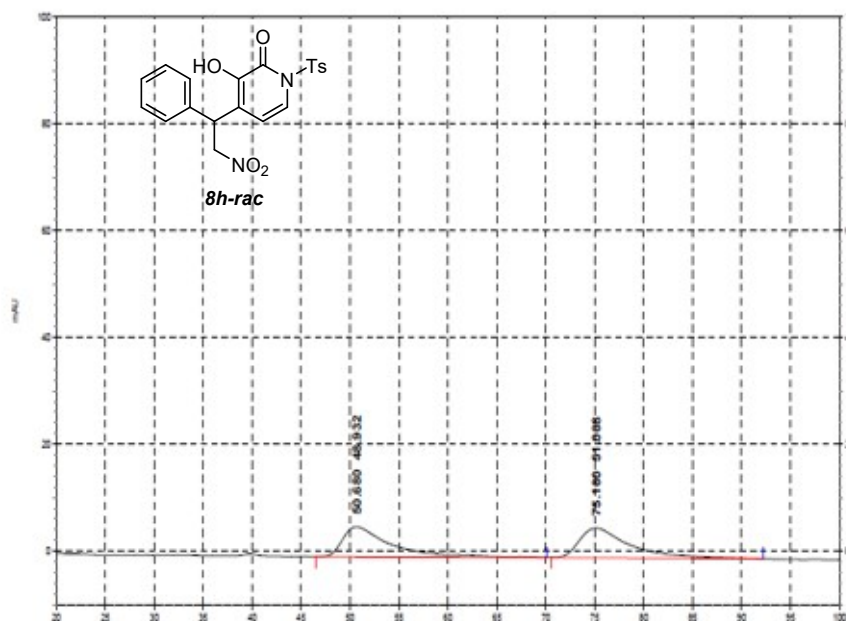

### UV Results

| Name | Retention Time | Area    | Area Percent | Integration Codes |
|------|----------------|---------|--------------|-------------------|
|      | 50.680         | 7595574 | 48.932       | mm                |
|      | 75.160         | 7927217 | 51.068       | MM                |

| Totals | Area     | Area Percent |
|--------|----------|--------------|
|        | 15522791 | 100.000      |

## Area Percent Report

Instrument Name: L-2000 Software  
 Version: Version LaChrom 890-8800-12  
 Acquisition Method: DAICEL Chiralcel OD-H, hexane : 2-propanol = 70 : 30,  
 flow rate = 0.5 ml/min, 23 °C,  $\lambda$  = 243 nm

Sample ID: *8h-chiral*

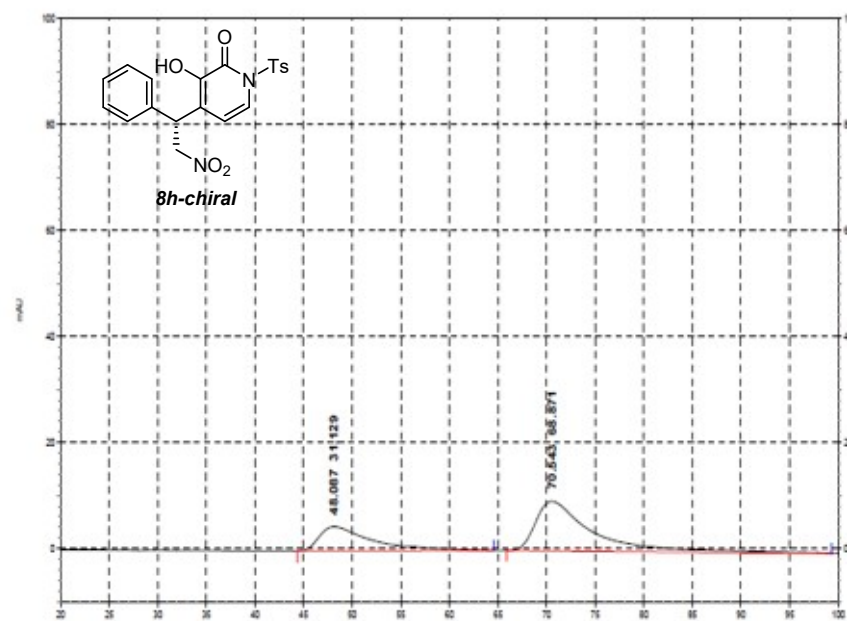

### UV Results

| Name | Retention Time | Area     | Area Percent | Integration Codes |
|------|----------------|----------|--------------|-------------------|
|      | 48.087         | 6888133  | 31.129       | MM                |
|      | 70.543         | 15239302 | 68.871       | MM                |

| Totals | Area     | Area Percent |
|--------|----------|--------------|
|        | 22127435 | 100.000      |

## Area Percent Report

Instrument Name: L-2000 Software

Version: Version LaChrom 890-8800-12

Acquisition Method: DAICEL Chiralcel OD-H, hexane : 2-propanol = 50 : 50,  
flow rate = 0.5 ml/min, 23 °C, λ = 240 nm

Sample ID: *8i-rac*

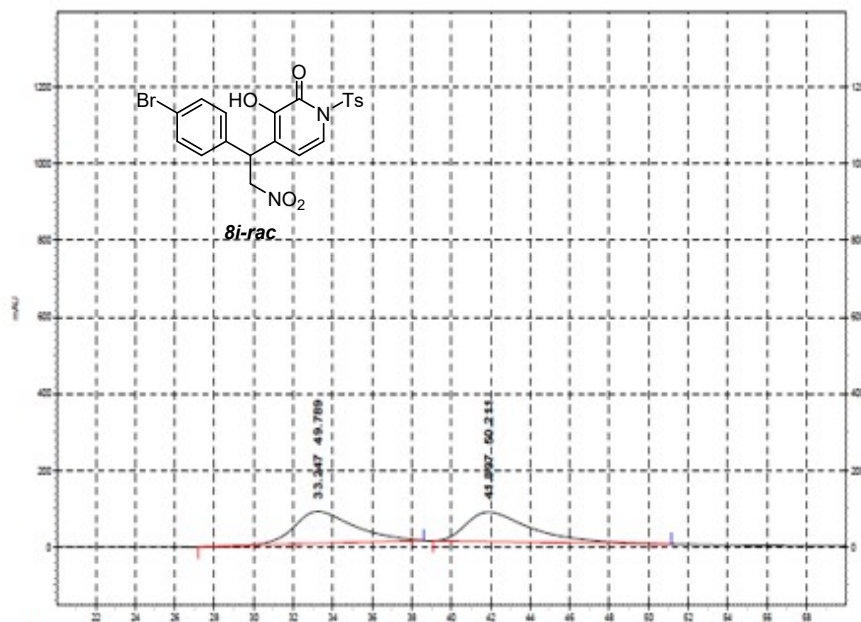

### UV Results

| Name | Retention Time | Area     | Area Percent | Integration Codes |
|------|----------------|----------|--------------|-------------------|
|      | 33.247         | 69622663 | 54.658       | mm                |
|      | 41.897         | 57756586 | 45.342       | mm                |

| Totals | Area      | Area Percent |
|--------|-----------|--------------|
|        | 127379249 | 100.000      |

## Area Percent Report

Instrument Name: L-2000 Software

Version: Version LaChrom 890-8800-12

Acquisition Method: DAICEL Chiralcel OD-H, hexane : 2-propanol = 50 : 50,  
flow rate = 0.5 ml/min, 23 °C, λ = 240 nm

Sample ID: *8i-chiral*

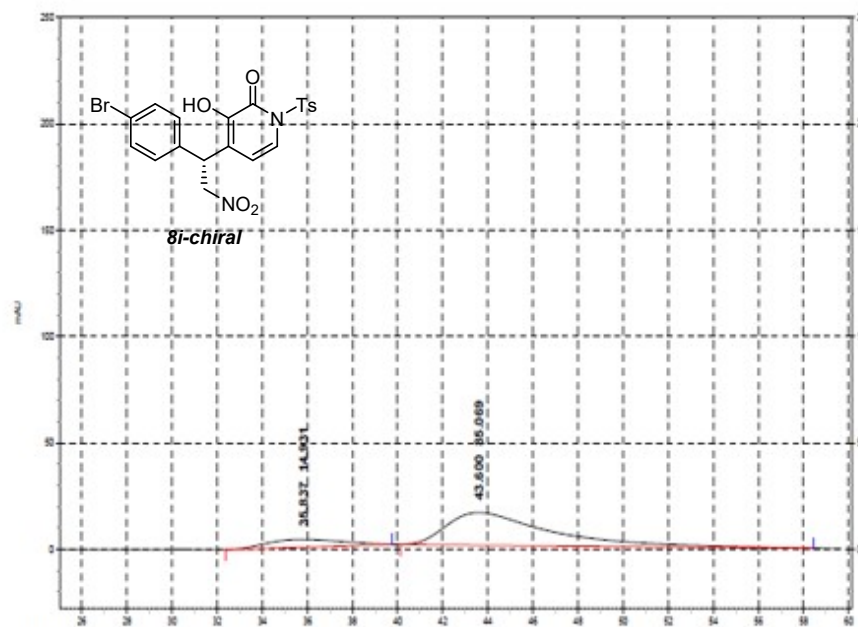

### UV Results

| Name | Retention Time | Area     | Area Percent | Integration Codes |
|------|----------------|----------|--------------|-------------------|
|      | 35.837         | 3406715  | 14.931       | MM                |
|      | 43.600         | 19409995 | 85.069       | MM                |

| Totals | Area     | Area Percent |
|--------|----------|--------------|
|        | 22816710 | 100.000      |



## Area Percent Report

Instrument Name: L-2000 Software  
 Version: Version LaChrom 890-8800-12  
 Acquisition Method: DAICEL Chiralcel OD-H, hexane : 2-propanol : trifluoroacetic acid = 700 : 300 : 1,  
 flow rate = 0.5 ml/min, 23 °C, λ = 240 nm  
 Sample ID: *8j-rac*

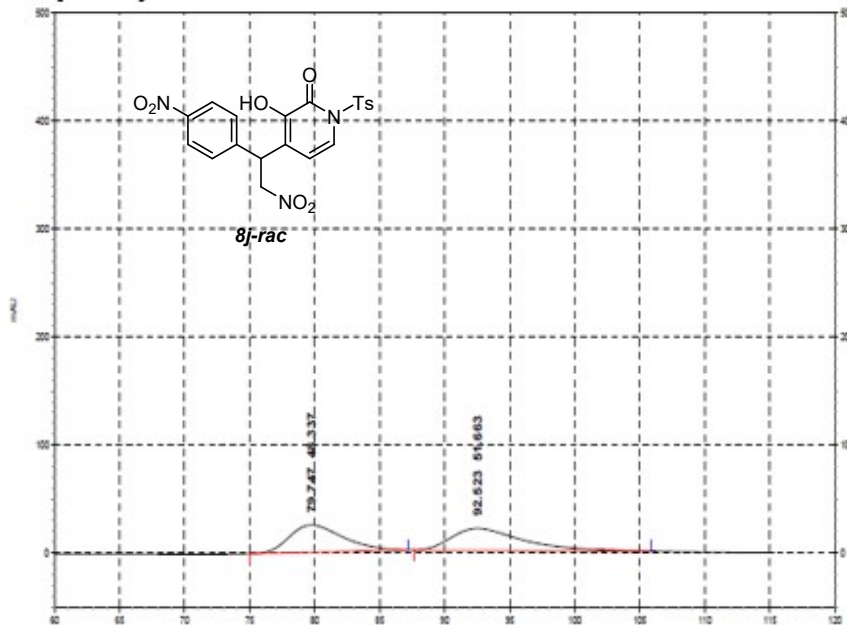

### UV Results

| Name | Retention Time | Area     | Area Percent | Integration Codes |
|------|----------------|----------|--------------|-------------------|
|      | 79.747         | 28948097 | 48.337       | MM                |
|      | 92.523         | 30940502 | 51.663       | mm                |

| Totals | Area     | Area Percent |
|--------|----------|--------------|
|        | 59888599 | 100.000      |

## Area Percent Report

Instrument Name: L-2000 Software  
 Version: Version LaChrom 890-8800-12  
 Acquisition Method: DAICEL Chiralcel OD-H, hexane : 2-propanol : trifluoroacetic acid = 700 : 300 : 1,  
 flow rate = 0.5 ml/min, 23 °C, λ = 240 nm  
 Sample ID: *8j-chiral*

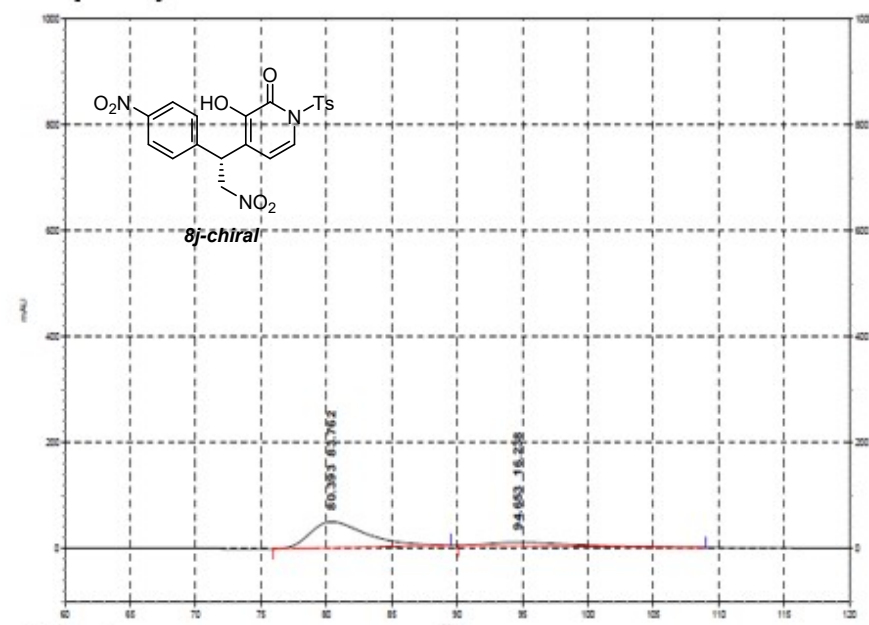

### UV Results

| Name | Retention Time | Area     | Area Percent | Integration Codes |
|------|----------------|----------|--------------|-------------------|
|      | 80.393         | 58252067 | 83.762       | MM                |
|      | 94.653         | 11292331 | 16.238       | MM                |

| Totals | Area     | Area Percent |
|--------|----------|--------------|
|        | 69544398 | 100.000      |

## Area Percent Report

Instrument Name: L-2000 Software

Version: Version LaChrom 890-8800-12

Acquisition Method: DAICEL Chiralcel OD-H, hexane : 2-propanol = 70 : 30,  
flow rate = 0.5 ml/min, 23 °C, λ = 243 nm

Sample ID: *8k-rac*

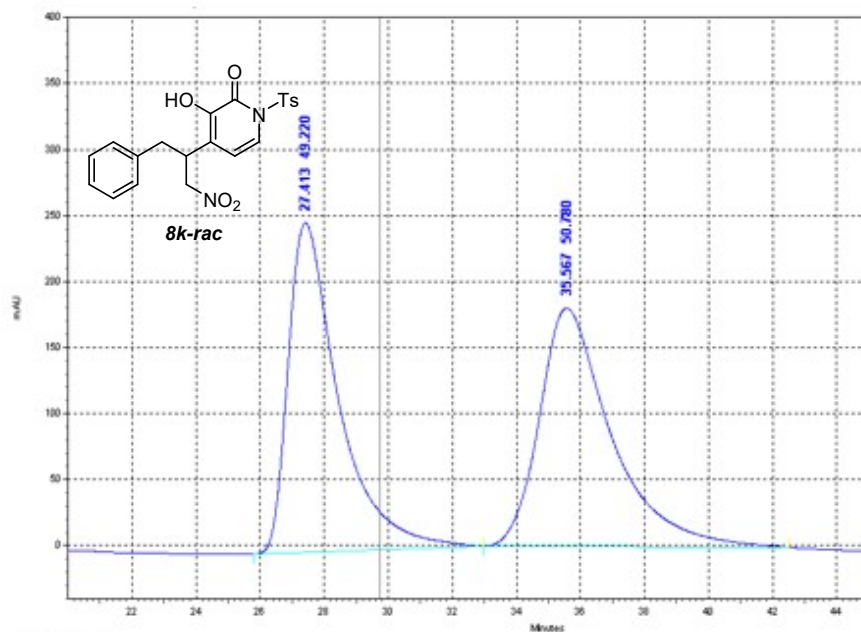

### UV Results

| Name | Retention Time | Area      | Area Percent | Integration Codes |
|------|----------------|-----------|--------------|-------------------|
|      | 27.413         | 109164241 | 49.220       | MM                |
|      | 35.567         | 112623173 | 50.780       | MM                |

|        |  |           |         |  |
|--------|--|-----------|---------|--|
| Totals |  | 221787414 | 100.000 |  |
|--------|--|-----------|---------|--|

## Area Percent Report

Instrument Name: L-2000 Software

Version: Version LaChrom 890-8800-12

Acquisition Method: DAICEL Chiralcel OD-H, hexane : 2-propanol = 70 : 30,  
flow rate = 0.5 ml/min, 23 °C, λ = 243 nm

Sample ID: *8k-chiral*

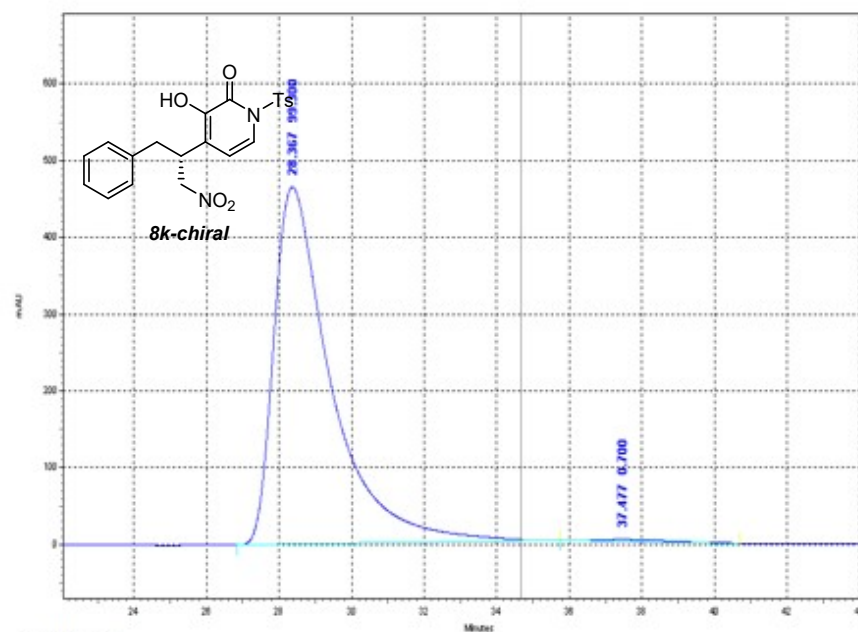

### UV Results

| Name | Retention Time | Area      | Area Percent | Integration Codes |
|------|----------------|-----------|--------------|-------------------|
|      | 28.367         | 204245403 | 99.300       | MM                |
|      | 37.477         | 1439612   | 0.700        | MM                |

|        |  |           |         |  |
|--------|--|-----------|---------|--|
| Totals |  | 205685015 | 100.000 |  |
|--------|--|-----------|---------|--|

## Area Percent Report

Instrument Name: L-2000 Software

Version: Version LaChrom 890-8800-12

Acquisition Method: DAICEL Chiralcel OD-H, hexane : 2-propanol : trifluoroacetic acid = 700 : 300 : 1,

flow rate = 0.5 ml/min, 23 °C, λ = 240 nm

Sample ID: *8l-rac*

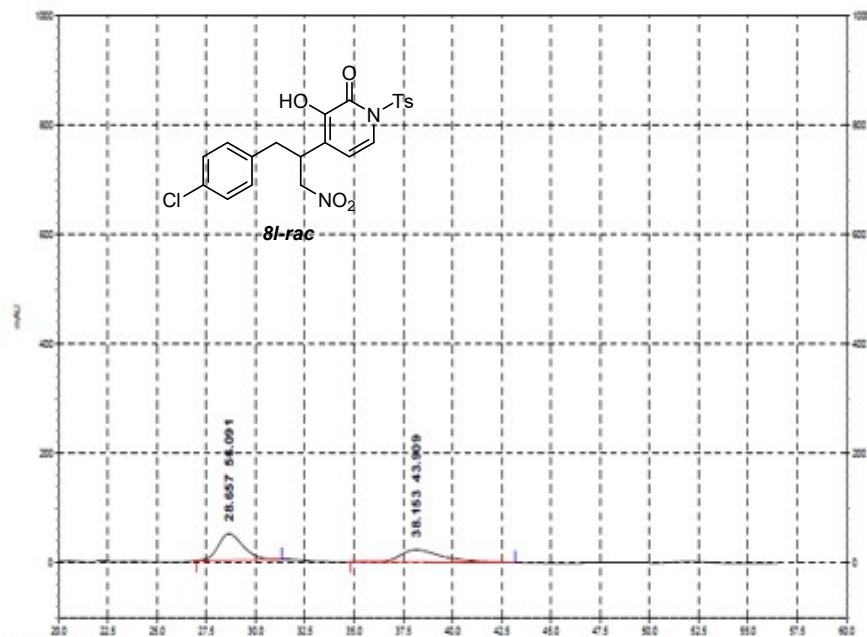

### UV Results

| Name | Retention Time | Area     | Area Percent | Integration Codes |
|------|----------------|----------|--------------|-------------------|
|      | 28.657         | 17121447 | 56.091       | MM                |
|      | 38.153         | 13402702 | 43.909       | MM                |

|        |  |          |         |  |
|--------|--|----------|---------|--|
| Totals |  | 30524149 | 100.000 |  |
|--------|--|----------|---------|--|

## Area Percent Report

Instrument Name: L-2000 Software

Version: Version LaChrom 890-8800-12

Acquisition Method: DAICEL Chiralcel OD-H, hexane : 2-propanol : trifluoroacetic acid = 700 : 300 : 1,

flow rate = 0.5 ml/min, 23 °C, λ = 240 nm

Sample ID: *8l-chiral*

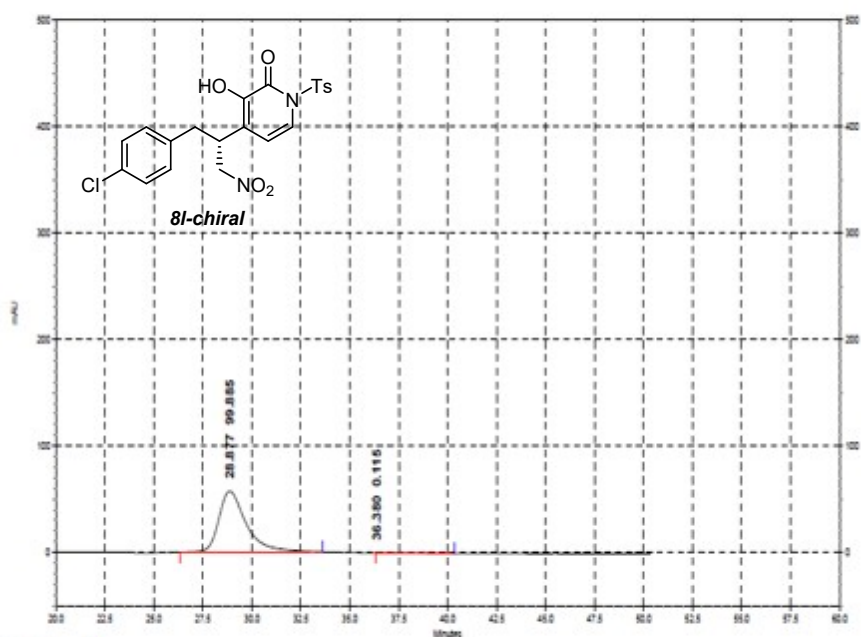

### UV Results

| Name | Retention Time | Area     | Area Percent | Integration Codes |
|------|----------------|----------|--------------|-------------------|
|      | 28.877         | 22324191 | 99.885       | MM                |
|      | 36.380         | 25720    | 0.115        | MM                |

|        |  |          |         |  |
|--------|--|----------|---------|--|
| Totals |  | 22349911 | 100.000 |  |
|--------|--|----------|---------|--|

## Area Percent Report

Instrument Name: L-2000 Software  
 Version: Version LaChrom 890-8800-12  
 Acquisition Method: DAICEL Chiralpak ID, hexane : 2-propanol = 50 : 50,  
 flow rate = 0.5 ml/min, 23 °C,  $\lambda$  = 243 nm

Sample ID: *8m-rac*

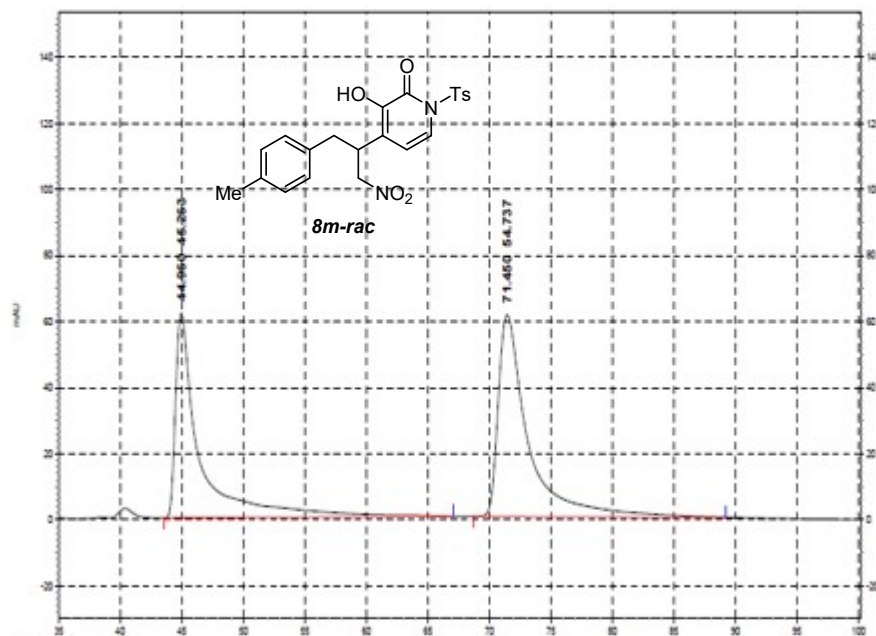

### UV Results

| Name | Retention Time | Area     | Area Percent | Integration Codes |
|------|----------------|----------|--------------|-------------------|
|      | 44.960         | 34107801 | 45.263       | mm                |
|      | 71.450         | 41246905 | 54.737       | mm                |

| Totals |  | Area     | Area Percent |
|--------|--|----------|--------------|
|        |  | 75354706 | 100.000      |

## Area Percent Report

Instrument Name: L-2000 Software  
 Version: Version LaChrom 890-8800-12  
 Acquisition Method: DAICEL Chiralpak ID, hexane : 2-propanol = 50 : 50,  
 flow rate = 0.5 ml/min, 23 °C,  $\lambda$  = 243 nm

Sample ID: *8m-chiral*

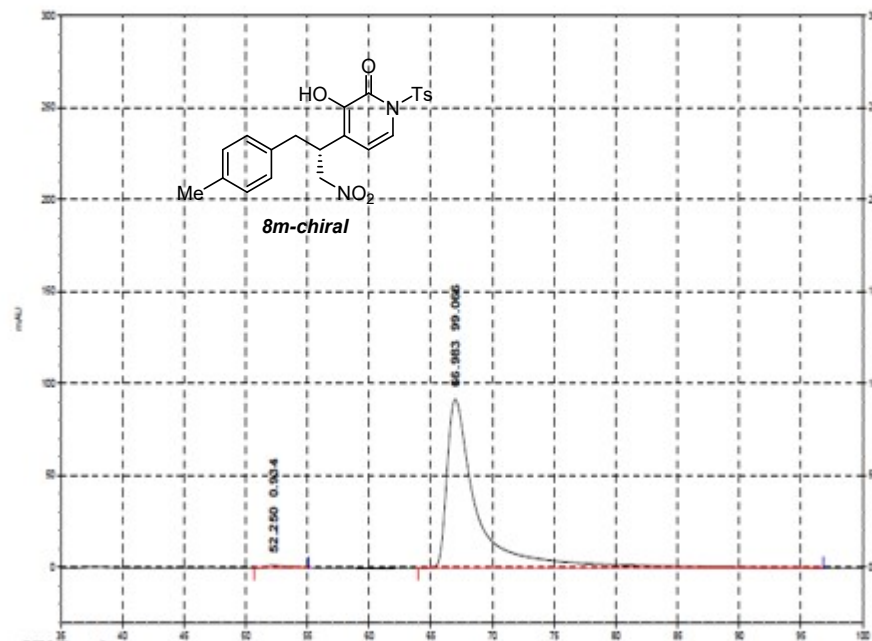

### UV Results

| Name | Retention Time | Area     | Area Percent | Integration Codes |
|------|----------------|----------|--------------|-------------------|
|      | 52.250         | 593006   | 0.934        | II                |
|      | 66.983         | 62881129 | 99.066       | MM                |

| Totals |  | Area     | Area Percent |
|--------|--|----------|--------------|
|        |  | 63474135 | 100.000      |

## Area Percent Report

Instrument Name: L-2000 Software

Version: Version LaChrom 890-8800-12

Acquisition Method: DAICEL Chiralpak ID, hexane : 2-propanol = 50 : 50,  
flow rate = 0.5 ml/min, 23 °C, λ = 243 nm

Sample ID: *8n-rac*

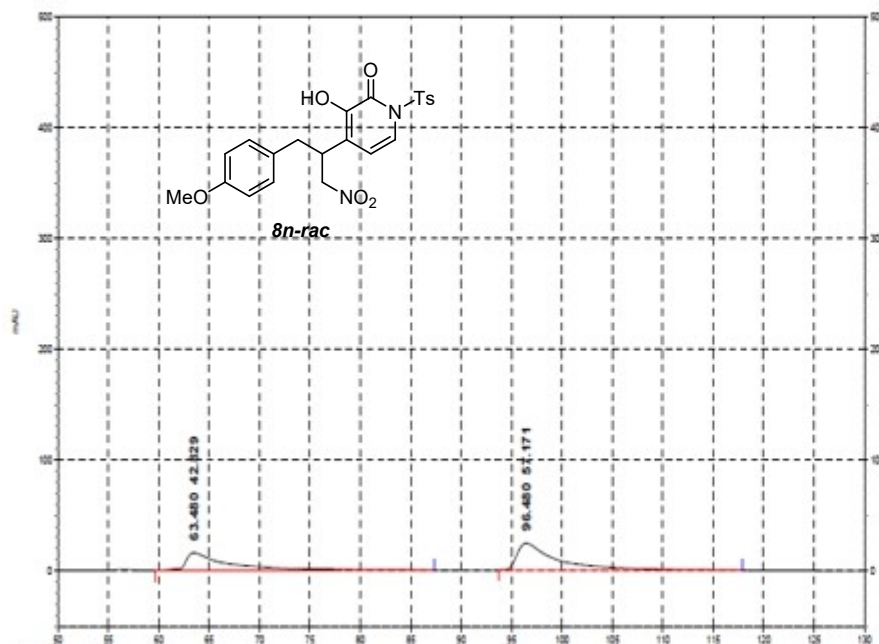

UV Results

| Name | Retention Time | Area     | Area Percent | Integration Codes |
|------|----------------|----------|--------------|-------------------|
|      | 63.480         | 20113113 | 42.829       | MM                |
|      | 96.480         | 26848159 | 57.171       | MM                |

| Totals | Area     | Area Percent |
|--------|----------|--------------|
|        | 46961272 | 100.000      |

## Area Percent Report

Instrument Name: L-2000 Software

Version: Version LaChrom 890-8800-12

Acquisition Method: DAICEL Chiralpak ID, hexane : 2-propanol = 50 : 50,  
flow rate = 0.5 ml/min, 23 °C, λ = 243 nm

Sample ID: *8n-chiral*

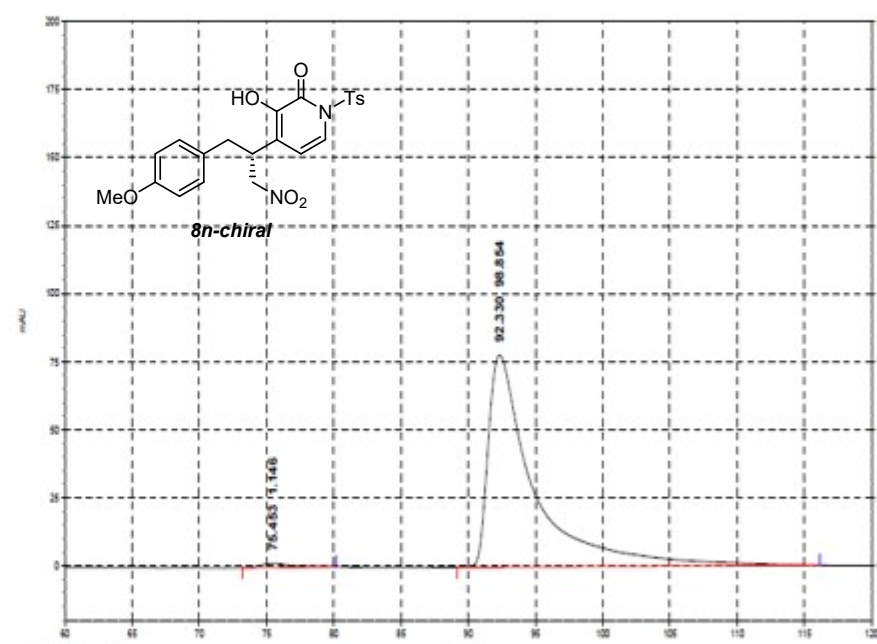

UV Results

| Name | Retention Time | Area     | Area Percent | Integration Codes |
|------|----------------|----------|--------------|-------------------|
|      | 75.453         | 854146   | 1.146        | MM                |
|      | 92.330         | 73664999 | 98.854       | MM                |

| Totals | Area     | Area Percent |
|--------|----------|--------------|
|        | 74519145 | 100.000      |

## Area Percent Report

Instrument Name: L-2000 Software

Version: Version LaChrom 890-8800-12

Acquisition Method: DAICEL Chiralcel OD-H, hexane : 2-propanol = 30 : 70,  
flow rate = 0.5 ml/min, 23 °C,  $\lambda$  = 243 nm

Sample ID: *8o-rac*

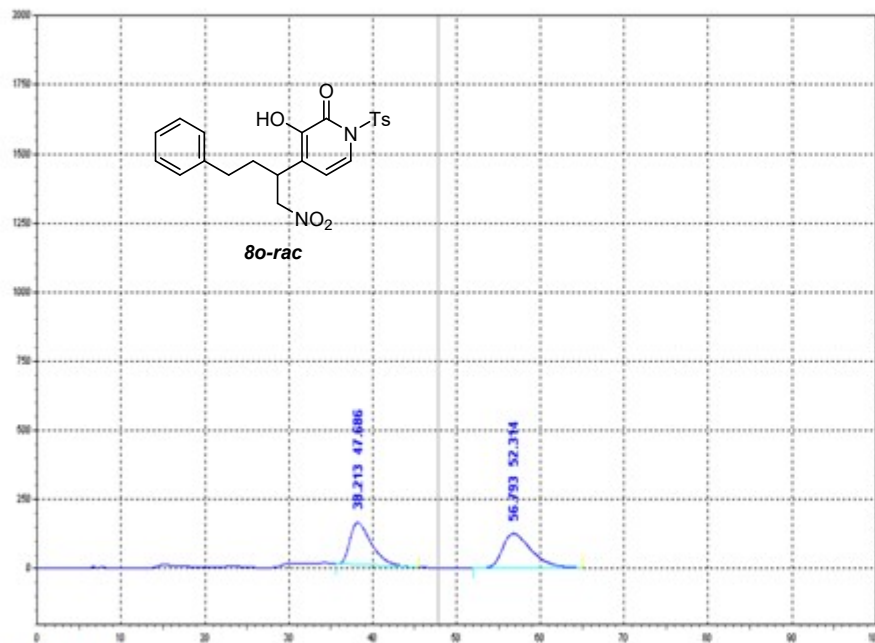

UV Results

| Name | Retention Time | Area      | Area Percent | Integration Codes |
|------|----------------|-----------|--------------|-------------------|
|      | 38.213         | 110314886 | 47.686       | MM                |
|      | 56.793         | 121021670 | 52.314       | MM                |

|        |  |           |         |  |
|--------|--|-----------|---------|--|
| Totals |  | 231336556 | 100.000 |  |
|--------|--|-----------|---------|--|

## Area Percent Report

Instrument Name: L-2000 Software

Version: Version LaChrom 890-8800-12

Acquisition Method: DAICEL Chiralcel OD-H, hexane : 2-propanol = 30 : 70,  
flow rate = 0.5 ml/min, 23 °C,  $\lambda$  = 243 nm

Sample ID: *8o-chiral*

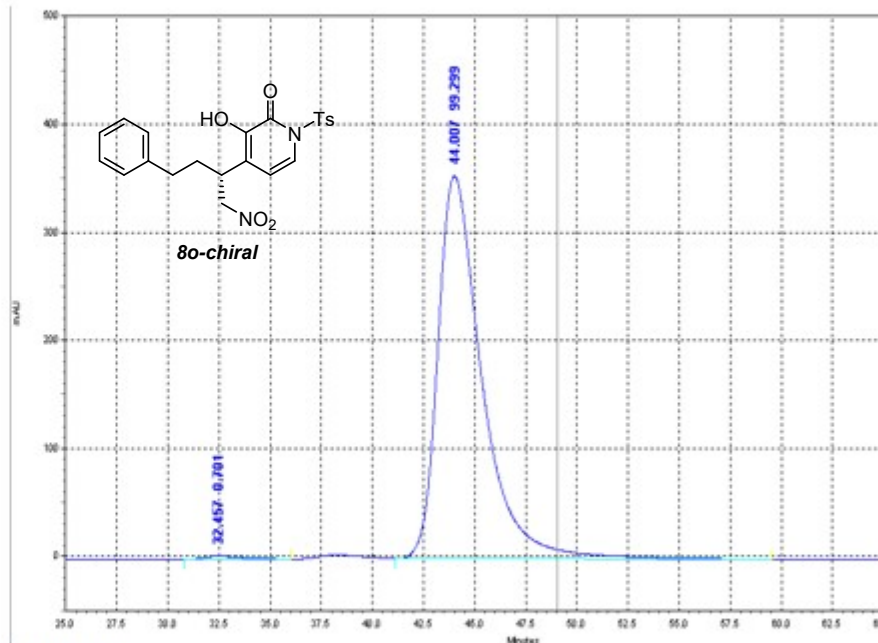

UV Results

| Name | Retention Time | Area      | Area Percent | Integration Codes |
|------|----------------|-----------|--------------|-------------------|
|      | 32.457         | 1499459   | 0.699        | MM                |
|      | 44.007         | 212992166 | 99.301       | MM                |

|        |  |           |         |  |
|--------|--|-----------|---------|--|
| Totals |  | 214491625 | 100.000 |  |
|--------|--|-----------|---------|--|

## Area Percent Report

Instrument Name: L-2000 Software  
 Version: Version LaChrom 890-8800-12  
 Acquisition Method: DAICEL Chiralpak OJ-H, hexane : 2-propanol = 50 : 50,  
 flow rate = 0.5 ml/min, 23 °C,  $\lambda$  = 243 nm

Sample ID: *8p-rac*

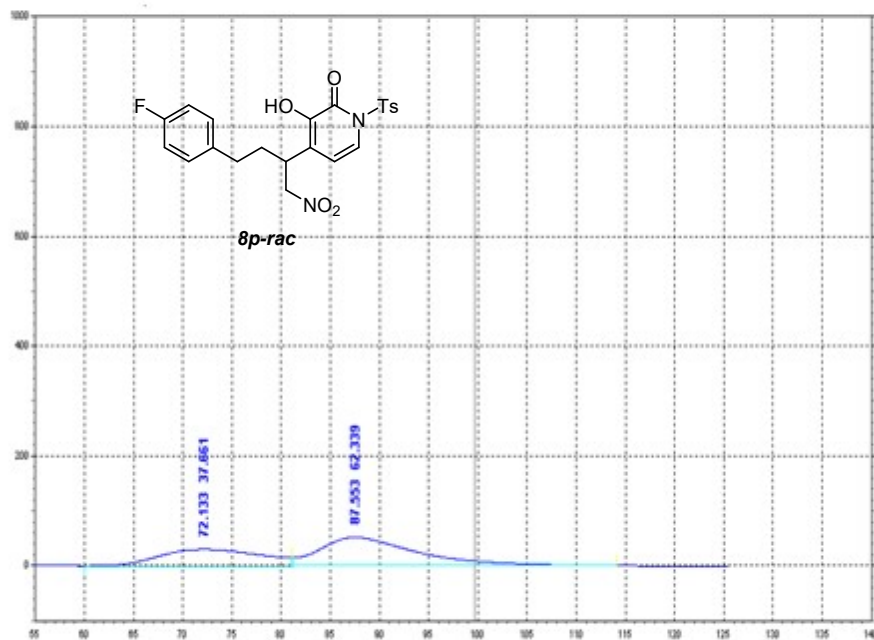

### UV Results

| Name | Retention Time | Area      | Area Percent | Integration Codes |
|------|----------------|-----------|--------------|-------------------|
|      | 72.133         | 86075395  | 37.661       | HH                |
|      | 87.553         | 142475517 | 62.339       | lh                |

| Totals | Area      | Area Percent |
|--------|-----------|--------------|
|        | 228550912 | 100.000      |

## Area Percent Report

Instrument Name: L-2000 Software  
 Version: Version LaChrom 890-8800-12  
 Acquisition Method: DAICEL Chiralpak OJ-H, hexane : 2-propanol = 50 : 50,  
 flow rate = 0.5 ml/min, 23 °C,  $\lambda$  = 243 nm

Sample ID: *8p-chiral*

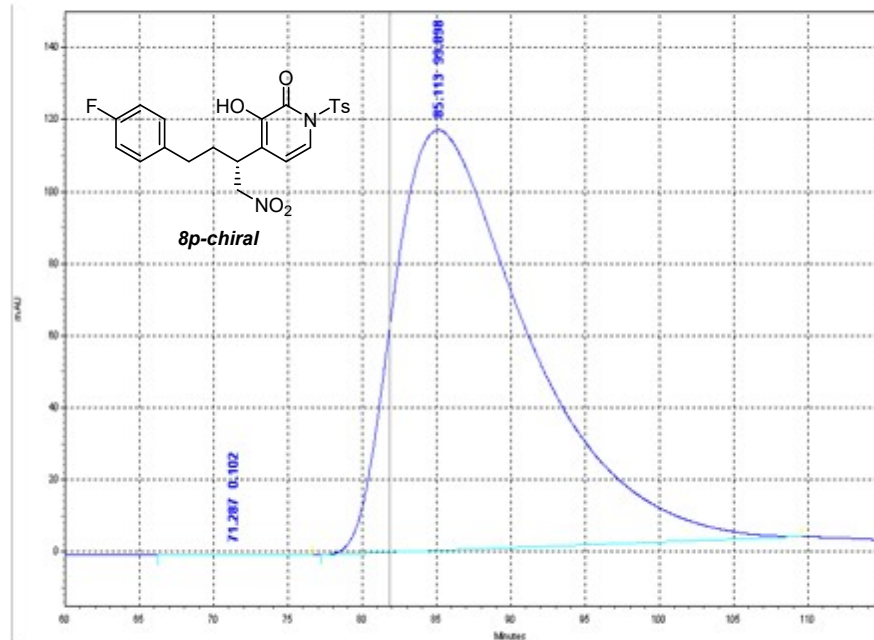

### UV Results

| Name | Retention Time | Area      | Area Percent | Integration Codes |
|------|----------------|-----------|--------------|-------------------|
|      | 71.287         | 302046    | 0.102        | MM                |
|      | 85.113         | 295929093 | 99.898       | MM                |

| Totals | Area      | Area Percent |
|--------|-----------|--------------|
|        | 296231139 | 100.000      |

## Area Percent Report

Instrument Name: L-2000 Software

Version: Version LaChrom 890-8800-12

Acquisition Method: DAICEL Chiralpak ID, hexane : 2-propanol = 30 : 70,  
flow rate = 0.5 ml/min, 23 °C,  $\lambda$  = 243 nm

Sample ID: *8q-rac*

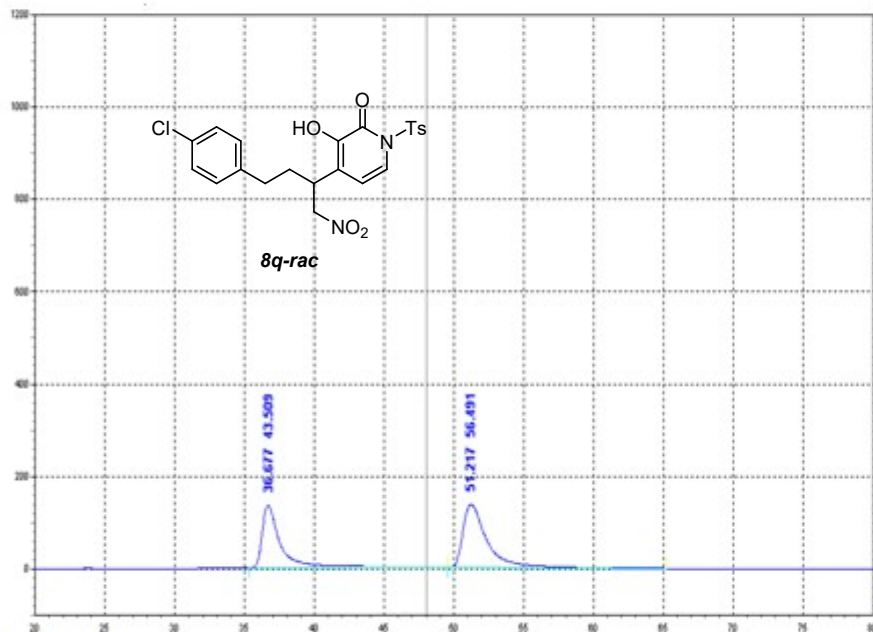

### UV Results

| Name | Retention Time | Area     | Area Percent | Integration Codes |
|------|----------------|----------|--------------|-------------------|
|      | 36.677         | 50643725 | 43.509       | MM                |
|      | 51.217         | 65755207 | 56.491       | MM                |

|        |  |           |         |  |
|--------|--|-----------|---------|--|
| Totals |  | 116398932 | 100.000 |  |
|--------|--|-----------|---------|--|

## Area Percent Report

Instrument Name: L-2000 Software

Version: Version LaChrom 890-8800-12

Acquisition Method: DAICEL Chiralpak ID, hexane : 2-propanol = 30 : 70,  
flow rate = 0.5 ml/min, 23 °C,  $\lambda$  = 243 nm

Sample ID: *8q-chiral*

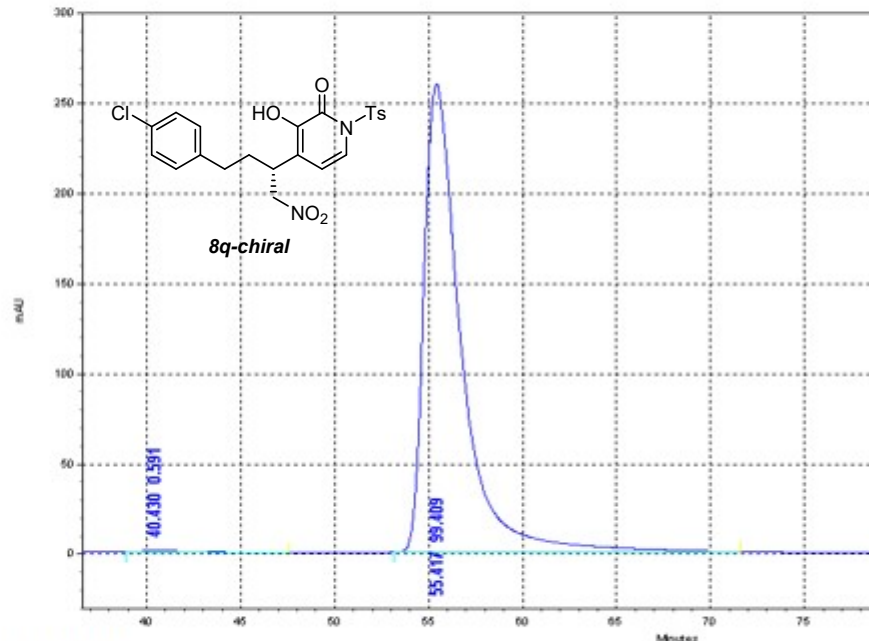

### UV Results

| Name | Retention Time | Area      | Area Percent | Integration Codes |
|------|----------------|-----------|--------------|-------------------|
|      | 40.430         | 849704    | 0.591        | MM                |
|      | 55.417         | 142910529 | 99.409       | MM                |

|        |  |           |         |  |
|--------|--|-----------|---------|--|
| Totals |  | 143760233 | 100.000 |  |
|--------|--|-----------|---------|--|



## Area Percent Report

Instrument Name: L-2000 Software

Version: Version LaChrom 890-8800-12

Acquisition Method: DAICEL Chiralpak ID, hexane : 2-propanol = 30 : 70,  
flow rate = 0.5 ml/min, 23 °C,  $\lambda$  = 243 nm

Sample ID: *8r-rac*

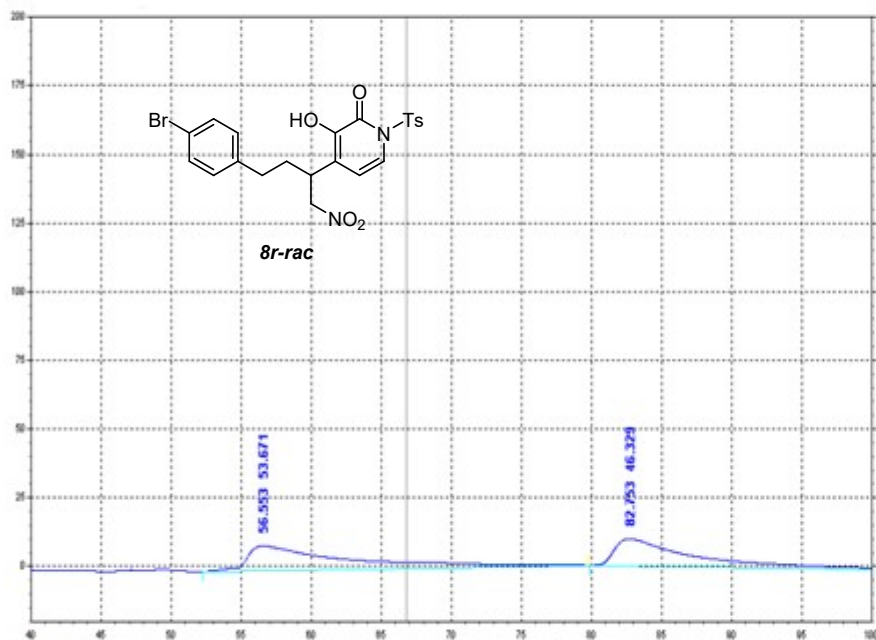

### UV Results

| Name | Retention Time | Area     | Area Percent | Integration Codes |
|------|----------------|----------|--------------|-------------------|
|      | 56.553         | 17203800 | 53.671       | MM                |
|      | 82.753         | 14850167 | 46.329       | MM                |

|        |  |          |         |  |
|--------|--|----------|---------|--|
| Totals |  | 32053967 | 100.000 |  |
|--------|--|----------|---------|--|

## Area Percent Report

Instrument Name: L-2000 Software

Version: Version LaChrom 890-8800-12

Acquisition Method: DAICEL Chiralpak ID, hexane : 2-propanol = 30 : 70,  
flow rate = 0.5 ml/min, 23 °C,  $\lambda$  = 243 nm

Sample ID: *8r-chiral*

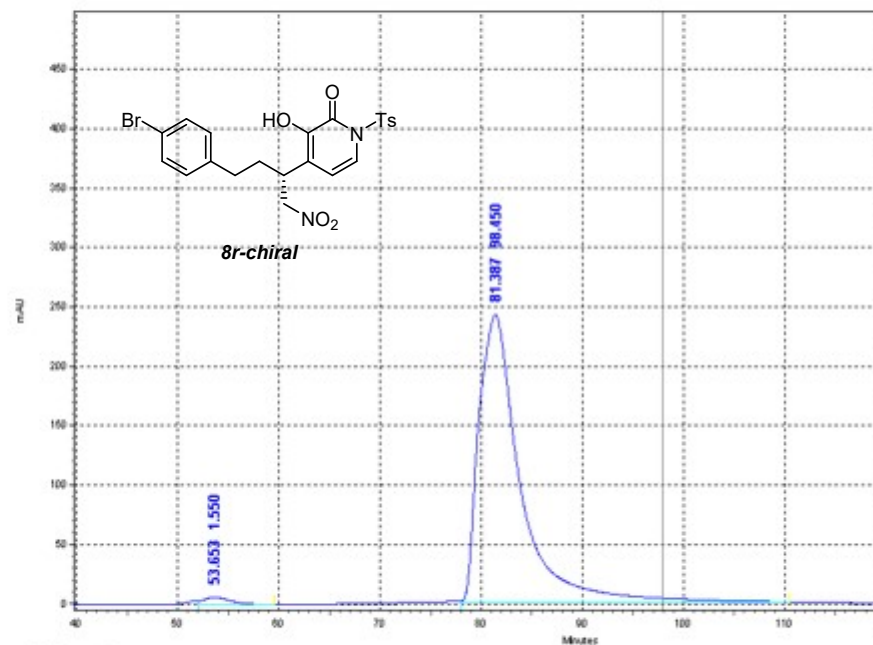

### UV Results

| Name | Retention Time | Area      | Area Percent | Integration Codes |
|------|----------------|-----------|--------------|-------------------|
|      | 53.653         | 4341143   | 1.550        | hh                |
|      | 81.387         | 275807991 | 98.450       | hh                |

|        |  |           |         |  |
|--------|--|-----------|---------|--|
| Totals |  | 280149134 | 100.000 |  |
|--------|--|-----------|---------|--|

## Area Percent Report

Instrument Name: L-2000 Software  
 Version: Version LaChrom 890-8800-12  
 Acquisition Method: DAICEL Chiralpak ID, hexane : 2-propanol = 30 : 70,  
 flow rate = 0.5 ml/min, 23 °C,  $\lambda$  = 243 nm

Sample ID: *8s-rac*

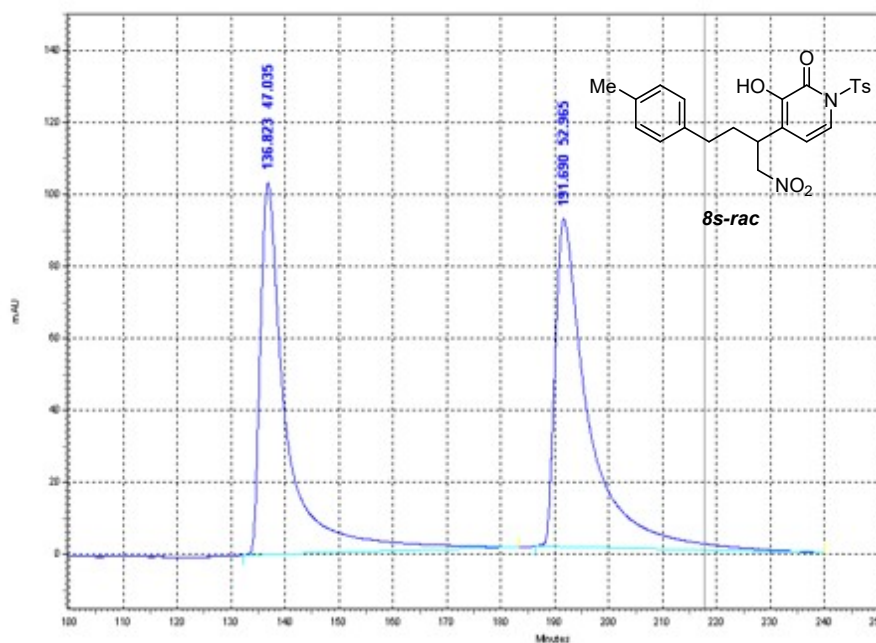

### UV Results

| Name | Retention Time | Area      | Area Percent | Integration Codes |
|------|----------------|-----------|--------------|-------------------|
|      | 136.823        | 139482596 | 47.035       | MM                |
|      | 191.690        | 157067662 | 52.965       | MM                |

| Totals | Area      | Area Percent |
|--------|-----------|--------------|
|        | 296550258 | 100.000      |

## Area Percent Report

Instrument Name: L-2000 Software  
 Version: Version LaChrom 890-8800-12  
 Acquisition Method: DAICEL Chiralpak ID, hexane : 2-propanol = 30 : 70,  
 flow rate = 0.5 ml/min, 23 °C,  $\lambda$  = 243 nm

Sample ID: *8s-chiral*

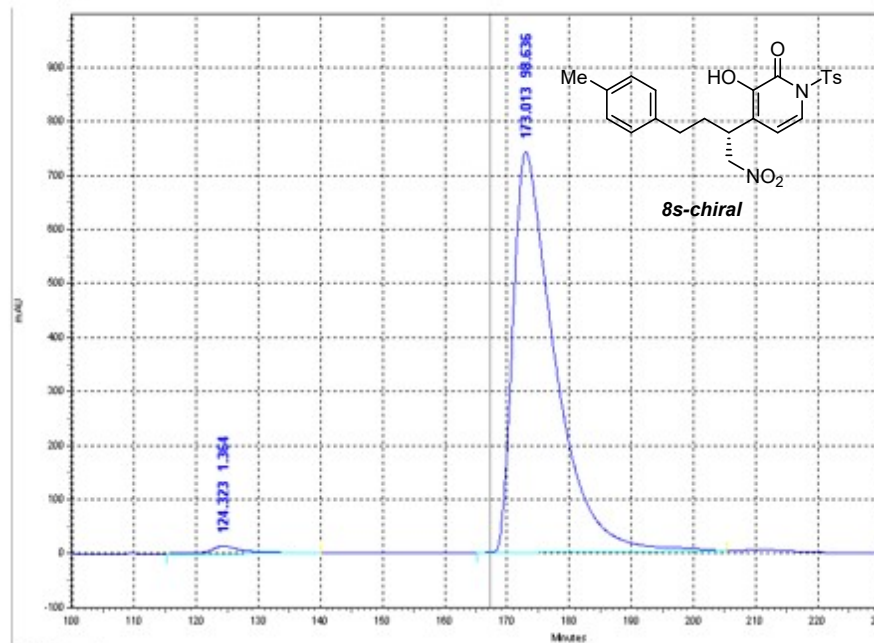

### UV Results

| Name | Retention Time | Area       | Area Percent | Integration Codes |
|------|----------------|------------|--------------|-------------------|
|      | 124.323        | 19200214   | 1.364        | MM                |
|      | 173.013        | 1388506134 | 98.636       | MM                |

| Totals | Area       | Area Percent |
|--------|------------|--------------|
|        | 1407706348 | 100.000      |

## Area Percent Report

Instrument Name: L-2000 Software  
 Version: Version LaChrom 890-8800-12  
 Acquisition Method: DAICEL Chiralpak ID, hexane : 2-propanol = 50 : 50,  
 flow rate = 0.5 ml/min, 23 °C, λ = 243 nm

Sample ID: *8t-rac*

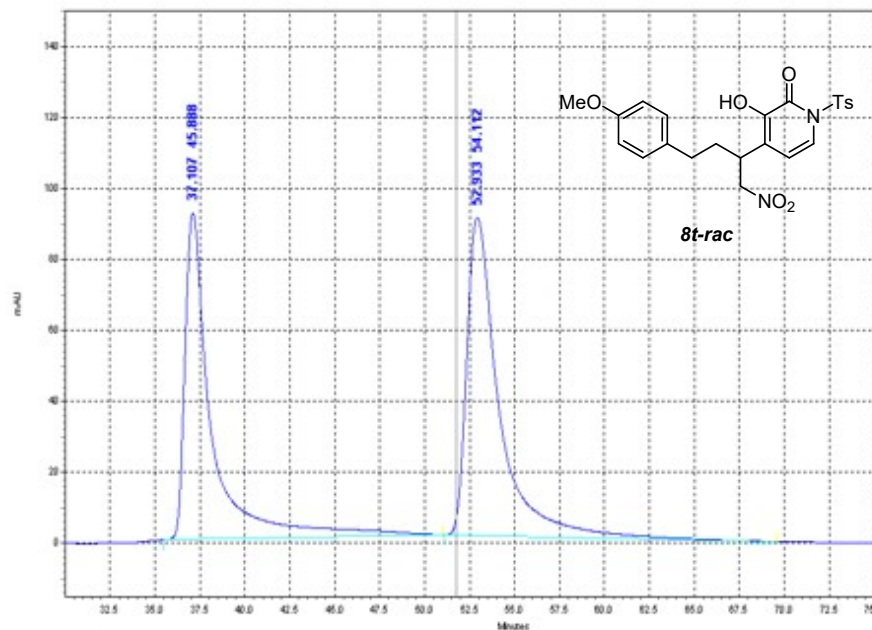

### UV Results

| Name | Retention Time | Area     | Area Percent | Integration Codes |
|------|----------------|----------|--------------|-------------------|
|      | 37.107         | 38258486 | 45.888       | MM                |
|      | 52.933         | 45115051 | 54.112       | MM                |

|        |  |          |         |  |
|--------|--|----------|---------|--|
| Totals |  | 83373537 | 100.000 |  |
|--------|--|----------|---------|--|

## Area Percent Report

Instrument Name: L-2000 Software  
 Version: Version LaChrom 890-8800-12  
 Acquisition Method: DAICEL Chiralpak ID, hexane : 2-propanol = 50 : 50,  
 flow rate = 0.5 ml/min, 23 °C, λ = 243 nm

Sample ID: *8t-chiral*

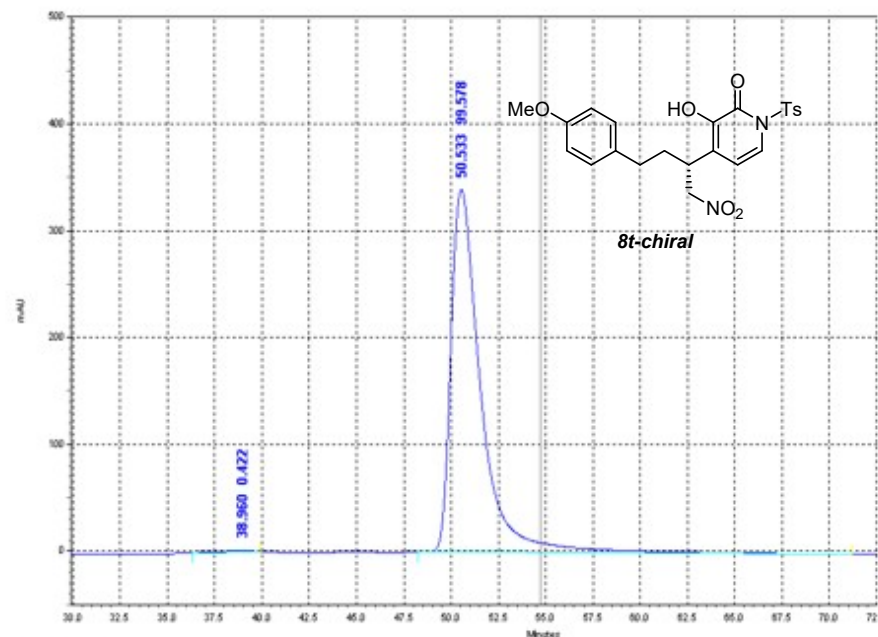

### UV Results

| Name | Retention Time | Area      | Area Percent | Integration Codes |
|------|----------------|-----------|--------------|-------------------|
|      | 38.960         | 637133    | 0.422        | MM                |
|      | 50.533         | 150415292 | 99.578       | MM                |

|        |  |           |         |  |
|--------|--|-----------|---------|--|
| Totals |  | 151052425 | 100.000 |  |
|--------|--|-----------|---------|--|

## (7) COSY & $^1\text{H}$ - $^{13}\text{C}$ HSQC

COSY of compound (8a)

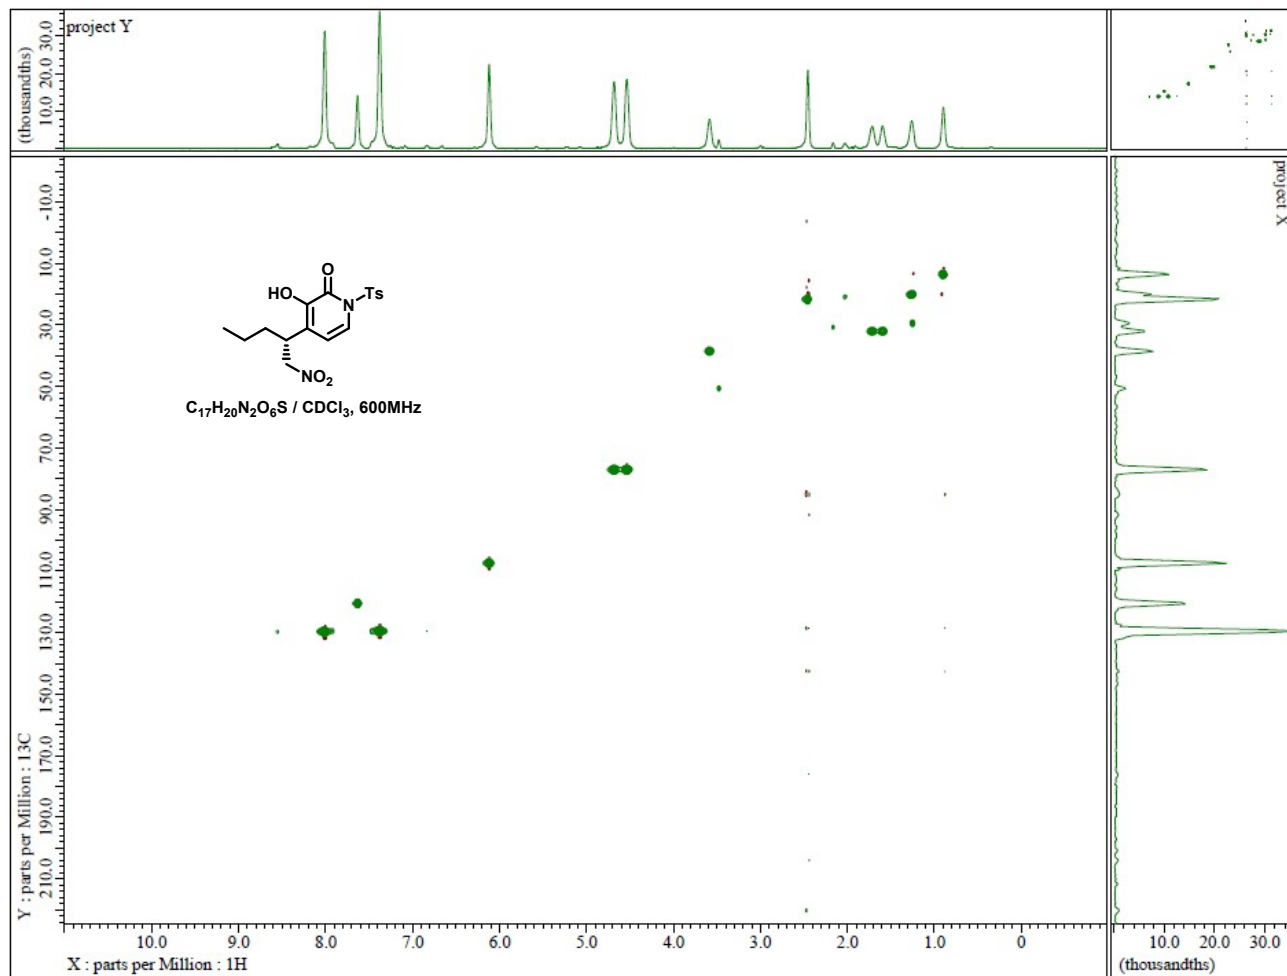

$^1\text{H}$ - $^{13}\text{C}$  HSQC of compound (8a)

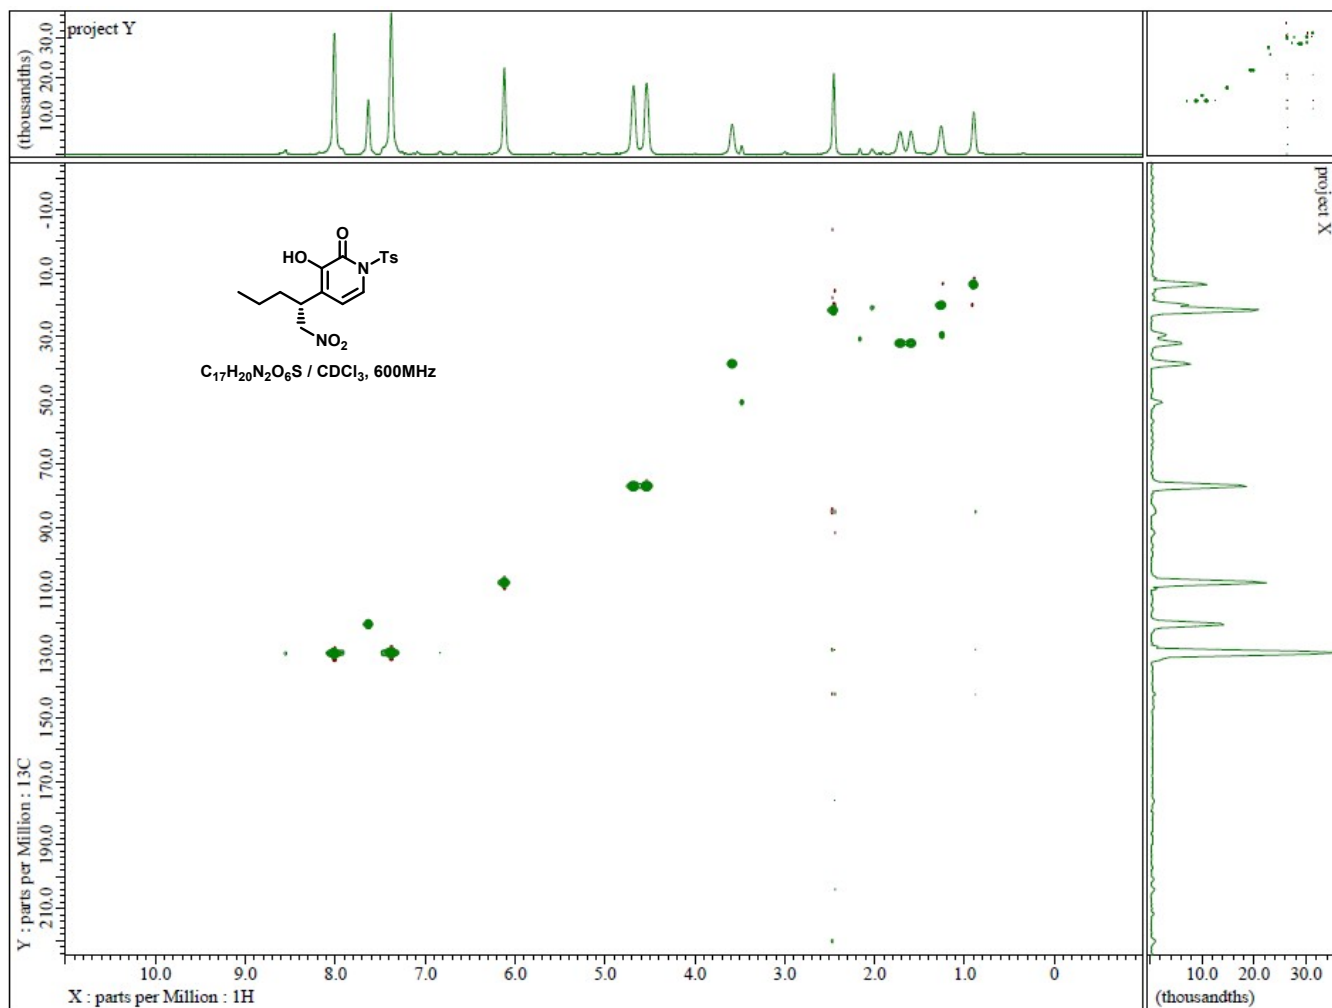



## (8) Gram-scale procedure of compound (8o)

To a solution of **6** (1.00 g, 3.77 mmol) and catalyst **5a** (273.3 mg, 0.377 mmol) dissolved in dichloromethane (38 mL) was added nitroolefin **7o** (1.34 g, 7.54 mmol) at -20 °C and the solution was stirred for 48 h. After the reaction finished, the reaction quenched with 1 N HCl and extracted with DCM. The aqueous phase was basified with NH<sub>4</sub>OH solution, the precipitate was collected by filtration and the catalyst **5a** was recovered as white solid (257.2 mg, recovery yield 94%). The organic phase was washed with brine, dried over anhydrous MgSO<sub>4</sub>, filtered and concentrated *in vacuo*. The residue was purified by flash column chromatography (ethyl acetate/hexane, 1/3, v/v) to afford Michael adduct **8o**

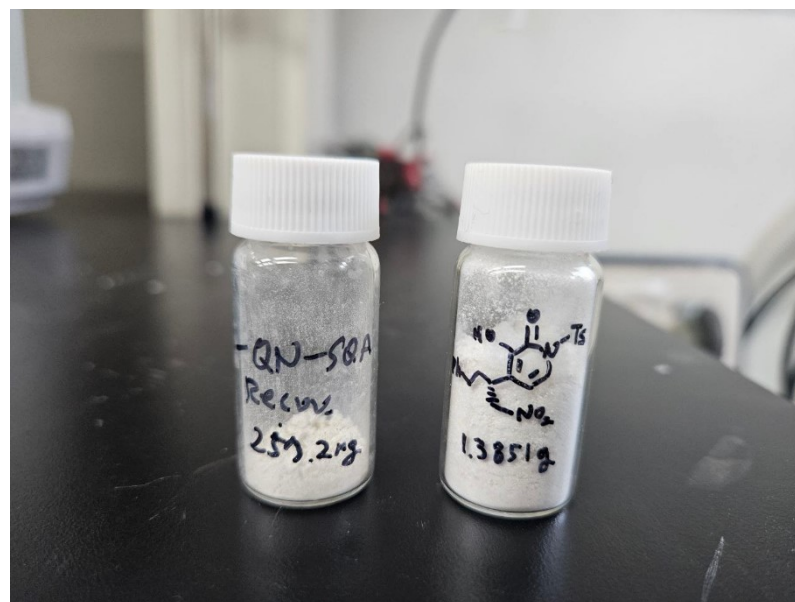

as white solid (1.39g, 83%).

## (9) X-ray Crystallographic Data of **8o**

The compound **8o** was dissolved in ethanol with heating, followed by recrystallization slowly at 40 °C bath. The crystals obtained were then used for X-ray crystallography.

|                                 |                                                                 |          |
|---------------------------------|-----------------------------------------------------------------|----------|
| Identification code             | <b>8o</b>                                                       |          |
| Empirical formula               | C <sub>22</sub> H <sub>22</sub> N <sub>2</sub> O <sub>6</sub> S |          |
| Formula weight                  | 442.47                                                          |          |
| Temperature                     | 223(2) K                                                        |          |
| Wavelength                      | 0.71073 Å                                                       |          |
| Crystal system                  | Orthorhombic                                                    |          |
| Space group                     | P2 <sub>1</sub> 2 <sub>1</sub> 2 <sub>1</sub>                   |          |
| Unit cell dimensions            | a = 5.8856(10) Å                                                | a = 90°. |
|                                 | b = 13.443(2) Å                                                 | b = 90°. |
|                                 | c = 26.710(5) Å                                                 | g = 90°. |
| Volume                          | 2113.3(6) Å <sup>3</sup>                                        |          |
| Z                               | 4                                                               |          |
| Density (calculated)            | 1.391 Mg/m <sup>3</sup>                                         |          |
| Absorption coefficient          | 0.196 mm <sup>-1</sup>                                          |          |
| F(000)                          | 928                                                             |          |
| Crystal size                    | 0.330 x 0.035 x 0.033 mm <sup>3</sup>                           |          |
| Theta range for data collection | 2.150 to 28.331°.                                               |          |
| Index ranges                    | -7<=h<=6, -17<=k<=17, -35<=l<=35                                |          |
| Reflections collected           | 43950                                                           |          |



|                                   |                                             |
|-----------------------------------|---------------------------------------------|
| Independent reflections           | 5242 [R(int) = 0.1348]                      |
| Completeness to theta = 25.242°   | 99.9 %                                      |
| Absorption correction             | Semi-empirical from equivalents             |
| Max. and min. transmission        | 0.7457 and 0.6353                           |
| Refinement method                 | Full-matrix least-squares on F <sup>2</sup> |
| Data / restraints / parameters    | 5242 / 24 / 318                             |
| Goodness-of-fit on F <sup>2</sup> | 1.050                                       |
| Final R indices [I>2sigma(I)]     | R1 = 0.0572, wR2 = 0.1368                   |
| R indices (all data)              | R1 = 0.1510, wR2 = 0.1797                   |
| Absolute structure parameter      | -0.01(7)                                    |
| Extinction coefficient            | n/a                                         |
| Largest diff. peak and hole       | 0.294 and -0.363 e.Å <sup>-3</sup>          |

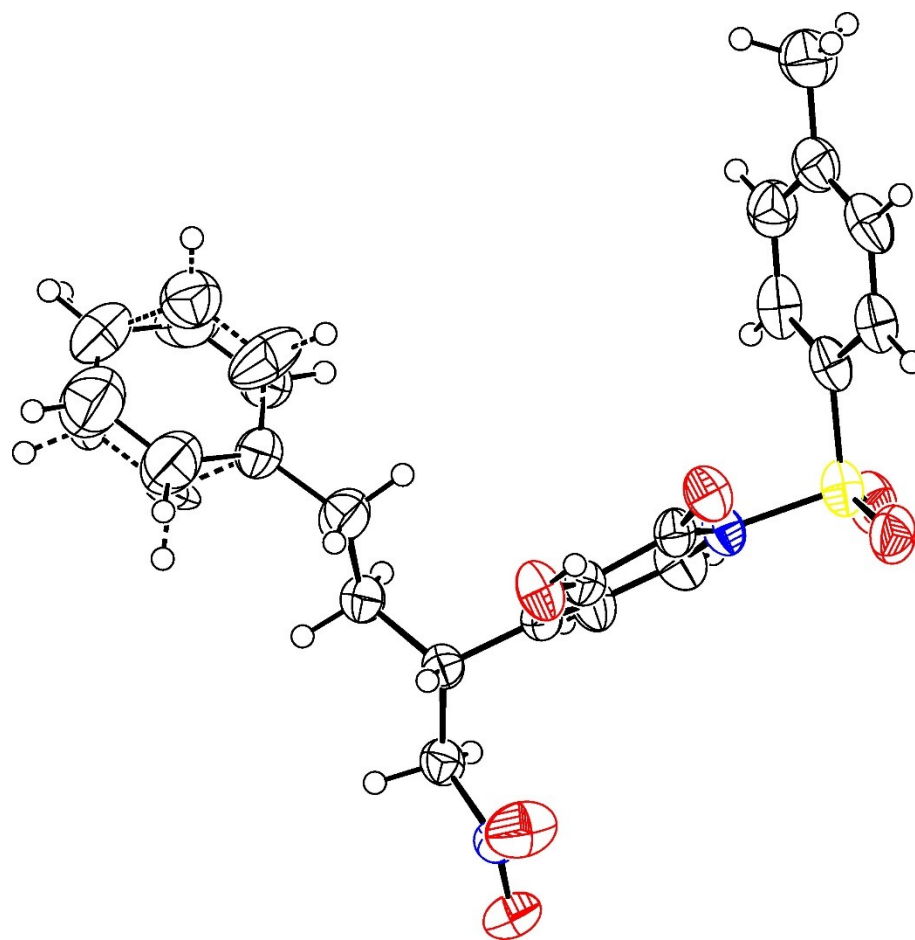

Supplement: d4ob01042f1.pdf [file d4ob01042f1.pdf]
